# Supplementary material for: Synthesis of N-functionalized 2,3-disubstituted benzofurans/naphthofurans from para-quinone methides and isocyanides via the [4 + 1] annulation pathway
Source: Royal Society of Chemistry journal article supplement (doi:10.1039/d3qo00048f), 2023-01-01
Supplement: d3qo00048f1.pdf [file d3qo00048f1.pdf]

## Supplementary Information

### Synthesis of N-Functionalized 2,3 - Disubstituted Benzofurans/Naphthofurans from *para*- Quinone Methides and Isocyanides via [4 +1] Annulation Pathway

Someshwar B. Kale<sup>a,b</sup>, Manish Kumar<sup>a,b</sup>, Dinesh R. Shinde<sup>a,b</sup>, Gamidi Rama Krishna<sup>c</sup> and Utpal Das<sup>a,b</sup> \*

<sup>a</sup>Division of Organic Chemistry, CSIR-National Chemical

<sup>b</sup>Academy of Scientific and Innovative Research (AcSIR), Ghaziabad 201002, India  
Laboratory, Pune- 411008, India

<sup>c</sup>X-ray Crystallography, CSIR- National Chemical Laboratory, Pune 411 008, India

## Table of contents

|                                                                         |             |
|-------------------------------------------------------------------------|-------------|
| 1. General Information                                                  | S3          |
| 2. General Procedure for Synthesis of Benzofurans & Naphthafurans       | S3          |
| 3. General Procedure for synthesis of compound <b>6</b>                 | S4          |
| 4. General Procedure for synthesis of Compounds <b>7a</b> and <b>7b</b> | S4          |
| 5. General Procedure for synthesis of Compounds <b>9</b>                | S4 –S5      |
| 4. Characterization of Compounds                                        | S6 - S24    |
| 5. <sup>1</sup> H NMR, and <sup>13</sup> C NMR Spectra of Compounds     | S25 - 132   |
| 6. X-Ray Crystal Data of Compound <b>3da</b> , <b>5am</b> & <b>6</b>    | S134 - S136 |
| 7. References.                                                          | S137        |
|                                                                         |             |

## 1. General Information

Unless otherwise stated, all commercially available reagents were used as received without further purification. All reactions were carried out using flame-dried glassware with magnetic stirring. All the solvents were distilled prior to use. Thin layer chromatography (TLC) was performed on precoated 0.25 mm silica gel plates 60 F254 and was visualized by exposure to ultraviolet light or KMnO<sub>4</sub>/DNP/Ninhydrin stain. Column chromatography was performed on silica gel (230-400 mesh) by using Teledyne Isco combi *flash RF+*. <sup>1</sup>H, <sup>13</sup>C NMR spectra were recorded on 400 MHz or 500 MHz Bruker/JEOL spectrometers using TMS as an internal standard. CDCl<sub>3</sub> was purchased from Merck (CDCl<sub>3</sub> at 7.26 ppm for <sup>1</sup>H and 77.16 ppm for <sup>13</sup>C), (DMSO-d<sub>6</sub> at 2.50 ppm for <sup>1</sup>H and 39.51 ppm for <sup>13</sup>C) Chemical shifts (δ) are given in ppm. All the NMR spectra were processed in either MestReNova or Bruker software. The following abbreviations are used to explain multiplicities: s = singlet, d = doublet, t = triplet and m = multiplet. High Resolution Mass Spectroscopy (HRMS) was recorded on Qexactive-orbitrap spectrometer with electrospray ionization as ionization source. Elemental analyses were recorded on a Thermo-Finnigan Flash EA 1112 analyzer. Melting points were recorded on Buchi B-540 instrument.

**Starting Materials.** All solvents and inorganic reagents were from commercial sources and used without purification unless otherwise noted. The *para*-quinone methides and isocyanide derivatives were prepared following the literature procedures.<sup>1-2</sup>

## 2. General Procedure for Synthesis of Benzofurans 3 & Naphthofurans 5

In an oven-dried round bottom flask *p*-QM<sup>1</sup> (0.1 mmol, 1eq), Isocyanide<sup>2</sup> (1eq) were dissolved in Toluene (0.5 mL) to this mixture Sc(OTf)<sub>3</sub> (10 mol%) was added and the reaction mixture was stirred for 15 min to 2 h at 30 °C. The progress of the reaction was monitored by TLC and was purified by using column chromatography on silica gel with a gradient eluent of petroleum ether and ethyl acetate.

### 3. General Procedure for Synthesis of Compound 6

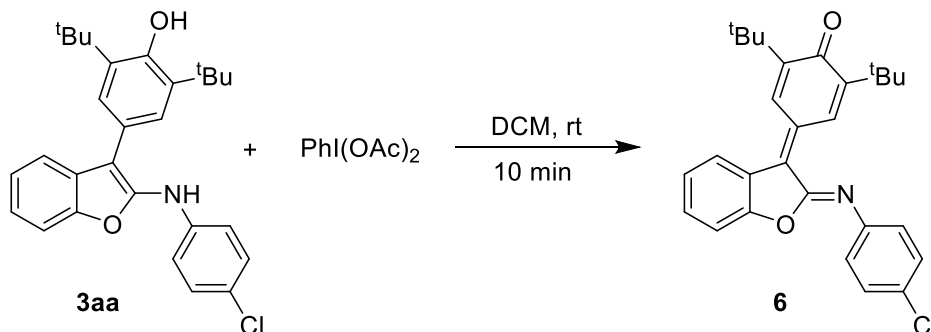

To a solution of Benzofuran **3aa** (0.1 mmol) in dichloromethane (DCM) (1 mL), (diacetoxyiodo)benzene (1 eq) was added. The reaction mixture was stirred at 30 °C for 10 min, the progress of the reaction was monitored by TLC and was purified by using column chromatography on silica gel with a gradient eluent of petroleum ether and ethyl acetate = 97:3 to afford 43.7 mg (88%) of the title compound

### 4. General Procedure for Synthesis of Compound 7a and 7b

In an oven dry round bottom flask  $\text{AlCl}_3$  (5 equiv.) and Benzofuran **3aa** (0.15 mmol) in anhydrous Toluene (2 mL/mmol) stirred under nitrogen atmosphere at 30 °C, reaction progress monitored by TLC. After the completion of reaction, the mixture was cooled to 0 °C and ice water was added to quench the  $\text{AlCl}_3$ . The mixture was extracted with EtOAc and the combined organic layers dried over  $\text{Na}_2\text{SO}_4$  and evaporated under vacuum and was purified by using column chromatography on silica gel with a gradient eluent of petroleum ether and ethyl acetate (5-15%). (For compound **7a** reaction stirred for 15 min and for compound **7b** for 6 hrs)

### 5. General Procedure for Synthesis of Compound 9

In an oven dry Schlenk tube *o*-hydroxybenzhydryl alcohol **8** (0.2 mmol), isocyanide **2a** (0.2 mmol), were dissolved in Toluene (1 mL) to this mixture  $\text{Sc}(\text{OTf})_3$  (10 mol%) was added and the reaction mixture was stirred for 30 min and then solvent of reaction mixture evaporated



under reduced pressure. The mixture of compound purified by using column chromatography on silica gel with a gradient eluent of ethyl acetate and petroleum ether (5-15%).

## 6. Characterization of Compounds

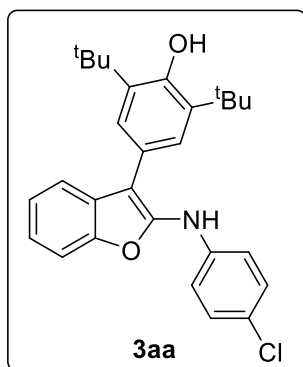

**(3aa):** Reaction time: (15 min); Brown solid (43.9 mg, 98%); mp 170-171 °C;  $R_f = 0.5$  (petroleum ether/ethyl acetate = 95/05);  $^1\text{H}$  NMR (500 MHz,  $\text{CDCl}_3$ )  $\delta$  7.70 – 7.63 (m, 1H), 7.50 – 7.43 (m, 1H), 7.38 (s, 2H), 7.23 – 7.18 (m, 2H), 7.20 (d,  $J = 8.8$  Hz, 2H), 6.89 (d,  $J = 8.8$  Hz, 2H), 6.07 (s, 1H), 5.29 (s, 1H), 1.44 (s, 18H);  $^{13}\text{C}$  NMR (126 MHz,  $\text{CDCl}_3$ )  $\delta$  153.09, 151.20, 147.06, 141.67, 136.68, 129.33, 128.97, 125.71, 125.05, 123.30, 123.18, 122.89, 119.28, 116.93, 110.97, 106.64, 34.56, 30.39; HRMS (ESI+) ( $m/z$ ) calcd for  $\text{C}_{28}\text{H}_{30}\text{ClNO}_2[\text{M}+\text{H}]^+$  448.2038 found 448.2025.

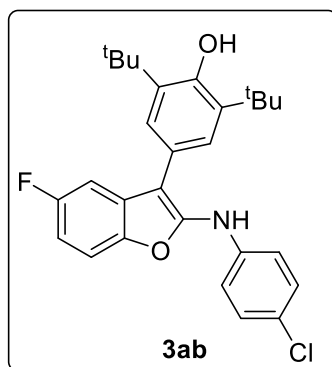

**(3ab):** Reaction time: (30 min); Brown solid (35.3 mg, 76%); mp 171-172 °C;  $R_f = 0.5$  (petroleum ether/ethyl acetate = 95/05);  $^1\text{H}$  NMR (500 MHz,  $\text{CDCl}_3$ )  $\delta$  7.35 (dd,  $J = 8.8, 4.1$  Hz, 1H), 7.30 (s, 2H), 7.27 – 7.22 (m, 1H), 7.20 (d,  $J = 8.8$  Hz, 2H), 6.98 – 6.88 (m, 3H), 6.14 (s, 1H), 5.30 (s, 1H), 1.44 (s, 18H);  $^{13}\text{C}$  NMR (126 MHz,  $\text{CDCl}_3$ )  $\delta$  159.80 (d,  $J = 237.9$  Hz), 153.21, 148.95, 147.07, 140.78, 136.89, 130.16 (d,  $J = 10.1$  Hz), 129.36, 126.18, 124.88, 122.46, 117.38, 111.39 (d,  $J = 9.6$  Hz), 110.15 (d,  $J = 26.2$  Hz), 105.26, 104.90 (d,  $J = 25.8$  Hz), 34.58, 30.39;  $^{19}\text{F}$  NMR (376 MHz,  $\text{CDCl}_3$ )  $\delta$  -120.21; HRMS (ESI+) ( $m/z$ ) calcd for  $\text{C}_{28}\text{H}_{29}\text{ClFNO}_2[\text{M}+\text{H}]^+$  466.1944 found 466.1930.

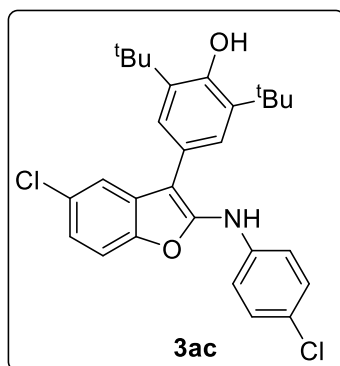

**(3ac):** Reaction time: (20 min); Sticky liquid (39.1 mg, 81%);  $R_f = 0.5$  (petroleum ether/ethyl acetate = 95/05);  $^1\text{H}$  NMR (400 MHz,  $\text{CDCl}_3$ )  $\delta$  7.53 (d,  $J = 2.0$  Hz, 1H), 7.34 (d,  $J = 8.6$  Hz, 1H), 7.27 (d,  $J = 7.2$  Hz, 2H), 7.23 – 7.13 (m, 3H), 6.91 (d,  $J = 8.8$  Hz, 2H), 6.14 (s, 1H), 5.29 (s, 1H), 1.43 (s, 18H);  $^{13}\text{C}$  NMR (101 MHz,  $\text{CDCl}_3$ )  $\delta$  153.29, 149.30, 148.71, 140.68, 136.94, 130.71, 129.37, 128.93,

126.28, 125.01, 122.93, 122.27, 118.65, 117.47, 111.75, 104.62, 34.58, 30.40; HRMS (ESI+) ( $m/z$ ) calcd for  $C_{28}H_{29}Cl_2NO_2$   $[M+H]^+$  482.1648 found 482.1641.

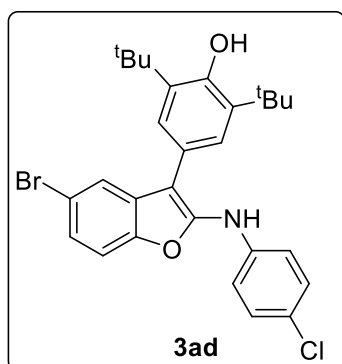

**(3ad):** Reaction time: (20 min); Sticky liquid (49.7 mg, 94%);  $R_f = 0.5$  (petroleum ether/ethyl acetate = 95/05);  $^1H$  NMR (400 MHz,  $CDCl_3$ )  $\delta$  7.68 (d,  $J = 1.6$  Hz, 1H), 7.36 – 7.29 (m, 2H), 7.27 (s, 2H), 7.20 (d,  $J = 8.9$  Hz, 2H), 6.91 (d,  $J = 8.9$  Hz, 2H), 6.14 (s, 1H), 5.30 (s, 1H), 1.43 (s, 18H);  $^{13}C$  NMR (101 MHz,  $CDCl_3$ )  $\delta$  153.31, 149.69, 148.58, 140.64, 136.95, 131.31, 129.37, 126.31, 125.65, 125.03, 122.23, 121.65, 117.49, 116.46, 112.23, 104.41, 34.58,

30.40; HRMS (ESI+) ( $m/z$ ) calcd for  $C_{28}H_{29}BrClNO_2$   $[M+H]^+$  526.1148 found 526.1144.

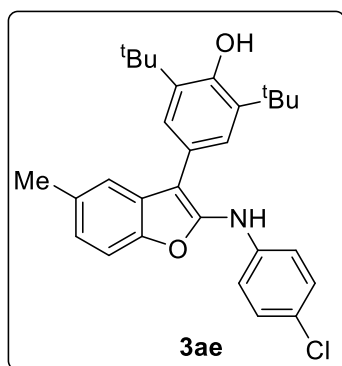

**(3ae):** Reaction time: (20 min); Brown solid (39.3 mg, 85%); mp 131-132 °C;  $R_f = 0.5$  (petroleum ether/ethyl acetate = 95/05);  $^1H$  NMR (500 MHz,  $CDCl_3$ )  $\delta$  7.42 (s, 1H), 7.36 – 7.31 (m, 3H), 7.19 (d,  $J = 8.7$  Hz, 2H), 7.08 (d,  $J = 8.2$  Hz, 1H), 6.87 (d,  $J = 8.7$  Hz, 2H), 6.02 (s, 1H), 5.27 (s, 1H), 2.46 (s, 3H), 1.43 (s, 18H);  $^{13}C$  NMR (126 MHz,  $CDCl_3$ )  $\delta$  153.06, 149.52, 147.18, 141.80, 136.64, 132.62, 129.32, 128.99, 125.63, 125.10, 124.37, 122.99, 119.26,

116.87, 110.51, 106.55, 34.57, 30.39, 21.74; HRMS (ESI+) ( $m/z$ ) calcd for  $C_{29}H_{32}ClNO_2$   $[M+H]^+$  462.2194 found 462.2184.

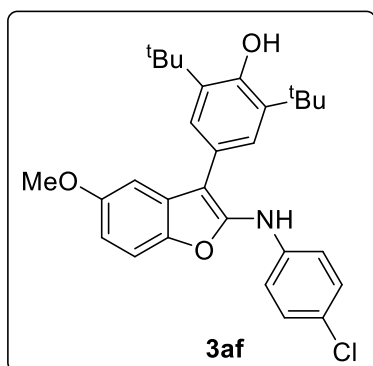

**(3af):** Reaction time: (20 min); Sticky liquid (40.2 mg, 84%);  $R_f = 0.7$  (petroleum ether/ethyl acetate = 95/05);  $^1H$  NMR (500 MHz,  $CDCl_3$ )  $\delta$  7.35 – 7.31 (m, 3H), 7.18 (d,  $J = 8.8$  Hz, 2H), 7.12 (d,  $J = 2.5$  Hz, 1H), 6.88 (d,  $J = 8.8$  Hz, 2H), 6.84 (dd,  $J = 8.8, 2.6$  Hz, 1H), 6.07 (s, 1H), 5.27 (s, 1H), 3.84 (s, 3H), 1.42 (s, 18H);  $^{13}C$  NMR (126 MHz,  $CDCl_3$ )  $\delta$  156.25, 152.92, 147.80, 145.82, 141.37, 136.62, 129.43, 129.20, 125.63, 124.82, 122.84,

116.89, 111.24, 111.00, 106.20, 102.35, 55.89, 34.46, 30.28; HRMS (ESI+) ( $m/z$ ) calcd for  $C_{29}H_{32}ClNO_3$   $[M+H]^+$  478.2143 found 478.2142.

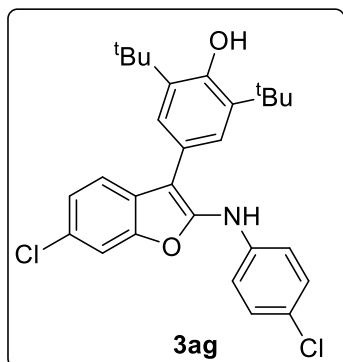

**(3ag):** Reaction time: (20 min); liquid (38.2 mg, 79%);  $R_f = 0.7$  (petroleum ether/ethyl acetate = 95/05);  $^1\text{H}$  NMR (500 MHz,  $\text{CDCl}_3$ )  $\delta$  7.53 (d,  $J = 2.1$  Hz, 1H), 7.34 (d,  $J = 8.6$  Hz, 1H), 7.28 (s, 2H), 7.23 – 7.12 (m, 3H), 6.92 (d,  $J = 8.8$  Hz, 2H), 6.14 (s, 1H), 5.30 (s, 1H), 1.44 (s, 18H);  $^{13}\text{C}$  NMR (126 MHz,  $\text{CDCl}_3$ )  $\delta$  153.28, 149.29, 148.69, 140.66, 136.91, 130.69, 129.36, 128.91, 126.26, 125.00, 122.92, 122.25, 118.63, 117.44, 111.75, 104.59, 34.57,

30.38; HRMS (ESI+) ( $m/z$ ) calcd for  $\text{C}_{28}\text{H}_{29}\text{Cl}_2\text{NO}_2$   $[\text{M}+\text{H}]^+$  482.1648 found 482.1644.

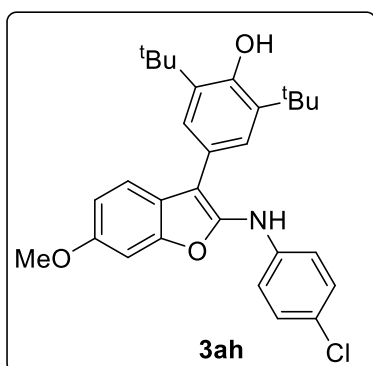

**(3ah):** Reaction time: (15 min); Brown solid (40.1 mg, 84%); mp 188-189 °C;  $R_f = 0.5$  (petroleum ether/ethyl acetate = 95/05);  $^1\text{H}$  NMR (500 MHz,  $\text{CDCl}_3$ )  $\delta$  7.57 (d,  $J = 8.6$  Hz, 1H), 7.37 (s, 2H), 7.19 (d,  $J = 8.6$  Hz, 2H), 7.03 (d,  $J = 1.6$  Hz, 1H), 6.94 (dd,  $J = 8.5, 1.8$  Hz, 1H), 6.80 (d,  $J = 8.6$  Hz, 2H), 5.88 (s, 1H), 5.28 (s, 1H), 3.88 (s, 3H), 1.42 (s, 18H);  $^{13}\text{C}$  NMR (126 MHz,  $\text{CDCl}_3$ )  $\delta$  157.76, 153.15, 152.38, 145.41, 142.88, 136.56, 129.35, 125.25,

124.98, 122.90, 121.88, 120.00, 116.25, 111.60, 109.56, 96.30, 55.93, 34.54, 30.35; HRMS (ESI+) ( $m/z$ ) calcd for  $\text{C}_{29}\text{H}_{32}\text{ClNO}_3$   $[\text{M}]^+$  477.2071 found 477.2067.

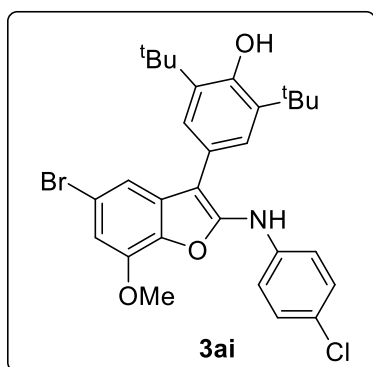

**(3ai):** Reaction time: (25 min); Brown solid (37.9 mg, 68%); mp 187-189 °C;  $R_f = 0.5$  (petroleum ether/ethyl acetate = 95/05);  $^1\text{H}$  NMR (400 MHz,  $\text{CDCl}_3$ )  $\delta$  7.34 (d,  $J = 1.7$  Hz, 1H), 7.16 (d,  $J = 8.8$  Hz, 2H), 6.91 (d,  $J = 1.7$  Hz, 1H), 6.84 (d,  $J = 8.9$  Hz, 2H), 6.07 (s, 1H), 5.28 (s, 1H), 4.00 (s, 3H), 1.41 (s, 18H);  $^{13}\text{C}$  NMR (101 MHz,  $\text{CDCl}_3$ )  $\delta$  153.31, 147.99, 145.36, 141.02, 138.87, 136.80, 132.00, 129.29, 126.00, 125.06, 122.19, 117.17, 116.35,

114.62, 109.63, 106.15, 56.53, 34.55, 30.37; Analysis Calculated for C, 62.54; H, 5.61; N, 2.52; Found C, 61.96; H, 6.21; N, 1.51.

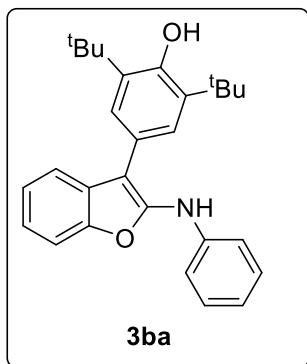

**(3ba):** Reaction time: (20 min); Brown solid (29.4 mg, 71%); mp 156-157 °C;  $R_f = 0.5$  (petroleum ether/ethyl acetate = 95/05);  $^1\text{H NMR}$  (500 MHz,  $\text{CDCl}_3$ )  $\delta$  7.67 (dd,  $J = 4.6, 2.4$  Hz, 1H), 7.48 (d,  $J = 6.5$  Hz, 1H), 7.42 (s, 2H), 7.36 – 7.25 (m, 4H), 7.08 – 6.87 (m, 3H), 6.11 (s, 1H), 5.29 (s, 1H), 1.45 (s, 18H);  $^{13}\text{C NMR}$  (126 MHz,  $\text{CDCl}_3$ )  $\delta$  152.97, 151.18, 147.81, 143.04, 136.64, 129.45, 129.11, 125.06, 123.18, 123.06, 123.00, 120.97, 119.10, 115.82, 110.94, 105.98, 34.57,

30.40; HRMS (ESI+) ( $m/z$ ) calcd for  $\text{C}_{28}\text{H}_{31}\text{NO}_2$   $[\text{M}+\text{H}]^+$  414.2428 found 414.2422.

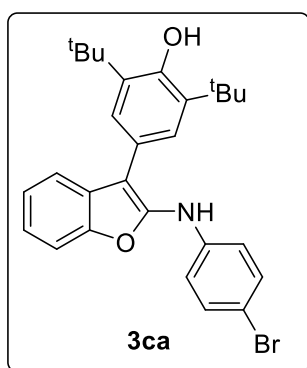

**(3ca):** Reaction time: (20 min); liquid (41.1 mg, 83%);  $R_f = 0.5$  (petroleum ether/ethyl acetate = 95/05);  $^1\text{H NMR}$  (400 MHz,  $\text{CDCl}_3$ )  $\delta$  7.58 – 7.52 (m, 1H), 7.38 – 7.31 (m, 1H), 7.25 – 7.20 (m, 2H), 7.19 – 7.14 (m, 2H), 6.73 (d,  $J = 8.9$  Hz, 2H), 5.96 (s, 1H), 5.18 (s, 1H), 1.33 (s, 18H);  $^{13}\text{C NMR}$  (101 MHz,  $\text{CDCl}_3$ )  $\delta$  153.12, 151.23, 146.95, 142.18, 136.72, 132.24, 128.96, 125.06, 123.34, 123.19, 122.88, 119.31, 117.36, 112.97, 110.99, 106.81, 34.58, 30.41; Analysis calcd

for C, 68.29; H, 6.14; N, 2.84; Found C, 67.64; H, 6.94; N, 1.82.

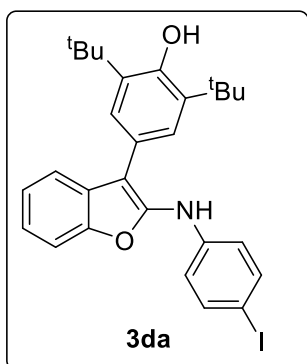

**(3da):** Reaction time: (20 min); liquid (41.1 mg, 76%);  $R_f = 0.5$  (petroleum ether/ethyl acetate = 95/05);  $^1\text{H NMR}$  (500 MHz,  $\text{CDCl}_3$ )  $\delta$  7.68 – 7.61 (m, 1H), 7.50 (d,  $J = 8.8$  Hz, 2H), 7.48 – 7.42 (m, 1H), 7.35 (s, 2H), 7.29 – 7.24 (m, 2H), 6.73 (d,  $J = 8.8$  Hz, 2H), 6.05 (s, 1H), 5.27 (s, 1H), 1.42 (s, 18H).;  $^{13}\text{C NMR}$  (126 MHz,  $\text{CDCl}_3$ )  $\delta$  153.12, 151.23, 146.79, 142.86, 138.14, 136.70, 128.93, 125.06, 123.37, 123.19, 122.84, 119.33, 117.83, 111.00, 106.93, 82.59, 34.58,

30.40; HRMS (ESI+) ( $m/z$ ) calcd for  $\text{C}_{28}\text{H}_{30}\text{INO}_2$   $[\text{M}]^+$  539.1321 found 539.1318.

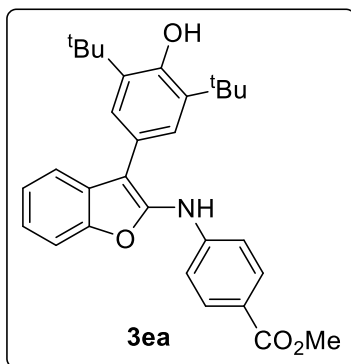

**(3ea):** Reaction time: (20 min); liquid (36.5 mg, 77%);  $R_f = 0.5$  (petroleum ether/ethyl acetate = 95/05);  $^1\text{H NMR}$  (500 MHz,  $\text{CDCl}_3$ )  $\delta$  7.94 (d,  $J = 8.6$  Hz, 2H), 7.77 – 7.61 (m, 1H), 7.49 (dd,  $J = 5.9, 2.9$  Hz, 1H), 7.38 (s, 2H), 7.35 – 7.27 (m, 2H), 6.94 (d,  $J = 8.7$  Hz, 2H), 6.33 (s, 1H), 5.30 (s, 1H), 3.89 (s, 3H), 1.41 (s, 18H);  $^{13}\text{C NMR}$  (126 MHz,  $\text{CDCl}_3$ )  $\delta$  167.09, 153.25, 151.45, 147.62, 145.77, 136.70, 131.57, 128.63, 125.06, 123.83, 123.24, 122.59,

122.07, 119.67, 114.43, 111.17, 108.86, 51.93, 34.55, 30.35; HRMS (ESI+) ( $m/z$ ) calcd for  $\text{C}_{30}\text{H}_{33}\text{NO}_4$   $[\text{M}]^+$  471.2404 found 471.2402.

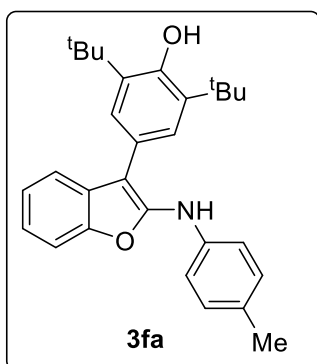

**(3fa):** Reaction time: (20 min); Brown solid (37.1 mg, 87%); mp 177-179 °C;  $R_f = 0.5$  (petroleum ether/ethyl acetate = 95/05);  $^1\text{H NMR}$  (500 MHz,  $\text{CDCl}_3$ )  $\delta$  7.64 (d,  $J = 7.8$  Hz, 1H), 7.46 (d,  $J = 7.4$  Hz, 1H), 7.41 (s, 2H), 7.33 – 7.16 (m, 2H), 7.08 (d,  $J = 8.2$  Hz, 2H), 6.93 (d,  $J = 8.3$  Hz, 2H), 6.07 (s, 1H), 5.27 (s, 1H), 2.31 (s, 3H), 1.46 (s, 18H);  $^{13}\text{C NMR}$  (126 MHz,  $\text{CDCl}_3$ )  $\delta$  152.85, 151.01, 148.51, 140.18, 136.63, 130.51, 129.89, 129.32, 125.04, 123.36, 123.03, 122.61,

118.78, 116.30, 110.81, 104.37, 34.57, 30.42, 20.74; HRMS (ESI+) ( $m/z$ ) calcd for  $\text{C}_{29}\text{H}_{33}\text{NO}_2$   $[\text{M}+\text{H}]^+$  428.2584 found 428.2578.

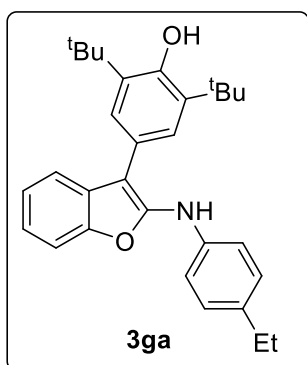

**(3ga):** Reaction time: (20 min); Brown solid (34.9 mg, 79%); mp 113-114 °C;  $R_f = 0.5$  (petroleum ether/ethyl acetate = 95/05);  $^1\text{H NMR}$  (500 MHz,  $\text{CDCl}_3$ )  $\delta$  7.65 (d,  $J = 6.6$  Hz, 1H), 7.47 (d,  $J = 7.2$  Hz, 1H), 7.42 (s, 2H), 7.32 – 7.23 (m, 2H), 7.12 (d,  $J = 7.5$  Hz, 2H), 6.96 (d,  $J = 7.5$  Hz, 2H), 6.09 (s, 1H), 5.28 (s, 1H), 2.62 (q,  $J = 14.04$  Hz, 2H), 1.47 (s, 18H), 1.24 (t,  $J = 7.3$  Hz, 3H);  $^{13}\text{C NMR}$  (126 MHz,  $\text{CDCl}_3$ )  $\delta$  152.86, 151.03, 148.49, 140.44, 137.11, 136.64, 129.33, 128.75, 125.06,

123.36, 123.03, 122.64, 118.82, 116.30, 110.83, 104.55, 34.59, 30.43, 28.25, 16.04; HRMS (ESI+) ( $m/z$ ) calcd for  $\text{C}_{30}\text{H}_{35}\text{NO}_2$   $[\text{M}+\text{H}]^+$  442.2741 found 442.2732.

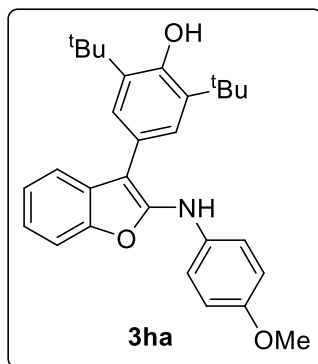

**(3ha):** Reaction time: (20 min); Brown solid (40.1 mg, 90%); mp 114-115 °C;  $R_f = 0.5$  (petroleum ether/ethyl acetate = 95/05);  $^1\text{H}$  NMR (500 MHz,  $\text{CDCl}_3$ )  $\delta$  7.62 (d,  $J = 7.5$  Hz, 1H), 7.43 (d,  $J = 7.9$  Hz, 1H), 7.39 (s, 2H), 7.30 – 7.20 (m, 2H), 6.99 (d,  $J = 8.7$  Hz, 2H), 6.84 (d,  $J = 8.8$  Hz, 2H), 6.03 (s, 1H), 5.27 (s, 1H), 3.80 (s, 3H), 1.46 (s, 18H);  $^{13}\text{C}$  NMR (126 MHz,  $\text{CDCl}_3$ )  $\delta$  154.71, 152.80, 150.86, 149.07, 136.65, 135.93, 129.50, 127.96, 125.00, 123.43, 123.05, 122.37, 118.57, 118.18, 114.79, 110.70, 103.18, 55.80, 34.58, 30.44; HRMS (ESI+) ( $m/z$ ) calcd for  $\text{C}_{29}\text{H}_{33}\text{NO}_3$   $[\text{M}+\text{H}]^+$  444.2533 found 444.2525.

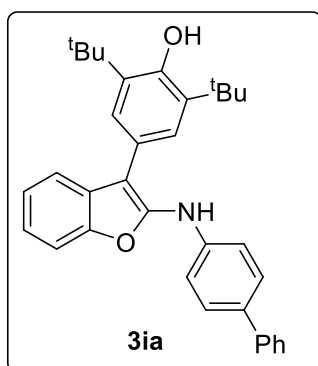

**(3ia):** Reaction time: (20 min); liquid (38.2 mg, 78%);  $R_f = 0.5$  (petroleum ether/ethyl acetate = 95/05);  $^1\text{H}$  NMR (400 MHz,  $\text{CDCl}_3$ )  $\delta$  7.68 – 7.60 (m, 1H), 7.49 – 7.45 (m, 2H), 7.44 – 7.37 (m, 3H), 7.35 – 7.30 (m, 1H), 7.28 (s, 2H), 7.25 – 7.21 (m, 2H), 7.20 – 7.12 (m, 2H), 7.02 – 6.90 (m, 2H), 6.17 (s, 1H), 5.18 (s, 1H), 1.35 (s, 18H);  $^{13}\text{C}$  NMR (101 MHz,  $\text{CDCl}_3$ )  $\delta$  152.99, 151.33, 147.15, 140.33, 138.78, 136.42, 130.60, 129.49, 129.22, 129.11, 129.08, 128.66, 127.80, 124.94, 123.32, 122.98, 120.78, 119.43, 115.33, 110.97, 108.11, 34.50, 30.36; HRMS (ESI+) ( $m/z$ ) calcd for  $\text{C}_{34}\text{H}_{35}\text{NO}_2$   $[\text{M}+\text{H}]^+$  490.2746 found 490.2740.

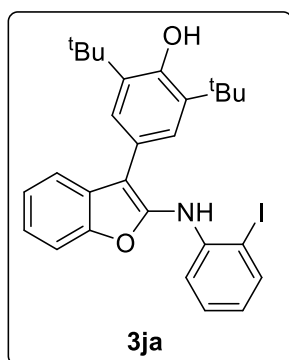

**(3ja):** Reaction time: (20 min); Brown solid (42.1 mg, 78%); mp 149-150 °C;  $R_f = 0.5$  (petroleum ether/ethyl acetate = 95/05);  $^1\text{H}$  NMR (500 MHz,  $\text{CDCl}_3$ )  $\delta$  7.78 – 7.68 (m, 2H), 7.54 – 7.45 (m, 1H), 7.40 (s, 2H), 7.31 (dd,  $J = 5.5, 3.2$  Hz, 2H), 7.20 – 7.03 (m, 1H), 6.99 (d,  $J = 8.1$  Hz, 1H), 6.67 – 6.59 (m, 1H), 6.54 (s, 1H), 5.27 (s, 1H), 1.45 (s, 18H);  $^{13}\text{C}$  NMR (126 MHz,  $\text{CDCl}_3$ )  $\delta$  153.16, 151.39, 146.46, 143.09, 139.14, 136.56, 129.45, 128.80, 124.94, 123.60, 123.17, 122.65, 122.19, 119.64, 115.29, 111.09, 108.35, 85.82, 34.58, 30.42; HRMS (ESI+) ( $m/z$ ) calcd for  $\text{C}_{28}\text{H}_{30}\text{INO}_2$   $[\text{M}+\text{H}]^+$  540.1394 found 540.1383.

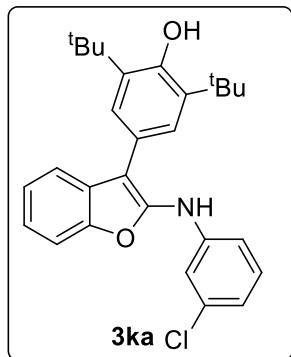

**(3ka):** Reaction time: (20 min); liquid (42.1 mg, 94%);  $R_f = 0.5$  (petroleum ether/ethyl acetate = 95/05);  $^1\text{H NMR}$  (400 MHz,  $\text{CDCl}_3$ )  $\delta$  7.69 – 7.60 (m, 1H), 7.50 – 7.42 (m, 1H), 7.34 (s, 2H), 7.31 – 7.23 (m, 1H), 7.17 – 7.10 (m, 1H), 6.94 – 6.88 (m, 1H), 6.86 (ddd,  $J = 7.9, 1.9, 0.8$  Hz, 1H), 6.78 (ddd,  $J = 8.2, 2.2, 0.8$  Hz, 1H), 6.06 (s, 1H), 5.26 (s, 1H), 1.41 (s, 18H);  $^{13}\text{C NMR}$  (101 MHz,  $\text{CDCl}_3$ )  $\delta$  153.16, 151.31, 146.54, 144.33, 136.68, 135.21, 130.38, 128.92, 125.09, 123.50, 123.19, 122.78, 120.81, 119.45, 115.62, 113.88, 111.08, 107.48, 34.57, 30.39; HRMS (ESI+) ( $m/z$ ) calcd for  $\text{C}_{28}\text{H}_{30}\text{ClNO}_2$   $[\text{M}]^+$  447.1960 found 447.1954.

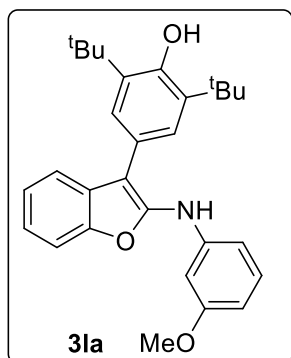

**(3la):** Reaction time: (20 min); liquid (34.5 mg, 78%);  $R_f = 0.5$  (petroleum ether/ethyl acetate = 95/05);  $^1\text{H NMR}$  (400 MHz,  $\text{CDCl}_3$ )  $\delta$  7.70 – 7.62 (m, 1H), 7.48 – 7.42 (m, 1H), 7.39 (s, 2H), 7.31 – 7.21 (m, 2H), 7.17 – 7.11 (m, 1H), 6.66 – 6.37 (m, 3H), 6.10 (s, 1H), 5.25 (s, 1H), 3.67 (s, 3H), 1.42 (s, 18H);  $^{13}\text{C NMR}$  (101 MHz,  $\text{CDCl}_3$ )  $\delta$  160.77, 152.94, 151.17, 147.47, 143.97, 136.56, 130.14, 129.15, 125.10, 123.15, 123.06, 123.05, 119.16, 110.91, 108.62, 106.61, 105.86, 101.78, 55.28, 34.55, 30.40; HRMS (ESI+) ( $m/z$ ) calcd for  $\text{C}_{29}\text{H}_{33}\text{NO}_3$   $[\text{M}]^+$  443.2455 found 443.2456.

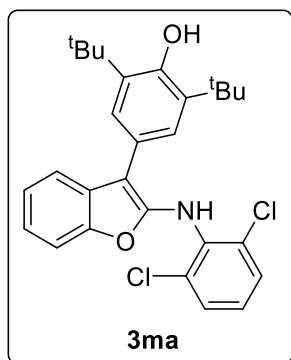

**(3ma):** Reaction time: (40 min); Brown solid (38.8 mg, 80%); mp 139-140 °C;  $R_f = 0.5$  (petroleum ether/ethyl acetate = 95/05);  $^1\text{H NMR}$  (400 MHz,  $\text{CDCl}_3$ )  $\delta$  7.62 – 7.50 (m, 1H), 7.46 – 7.32 (m, 3H), 7.27 – 7.15 (m, 4H), 6.96 – 6.77 (m, 1H), 6.38 (s, 1H), 5.19 (s, 1H), 1.45 (s, 18H);  $^{13}\text{C NMR}$  (101 MHz,  $\text{CDCl}_3$ )  $\delta$  152.84, 150.79, 146.84, 136.12, 135.93, 129.89, 128.81, 127.23, 125.48, 123.67, 123.01, 122.87, 122.78, 119.06, 110.78, 105.29, 34.54, 30.44; HRMS (ESI+) ( $m/z$ ) calcd for  $\text{C}_{28}\text{H}_{29}\text{Cl}_2\text{NO}_2$   $[\text{M}+\text{H}]^+$  482.1648 found 482.1643.

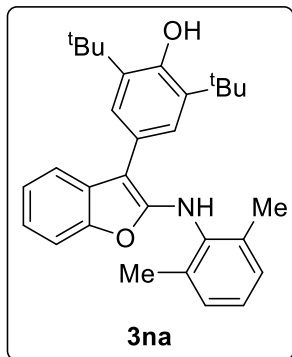

**(3na):** Reaction time: (20 min); liquid (33.6 mg, 76%);  $R_f = 0.5$  (petroleum ether/ethyl acetate = 95/05);  $^1\text{H NMR}$  (500 MHz,  $\text{CDCl}_3$ )  $\delta$  7.52 (d,  $J = 7.7$  Hz, 1H), 7.45 (s, 2H), 7.29 (d,  $J = 8.0$  Hz, 1H), 7.23 – 7.20 (m, 1H), 7.12 – 7.04 (m, 4H), 5.88 (s, 1H), 5.24 (s, 1H), 2.31 (s, 6H), 1.52 (s, 18H);  $^{13}\text{C NMR}$  (126 MHz,  $\text{CDCl}_3$ )  $\delta$  152.26, 151.43, 150.07, 136.45, 134.13, 130.87, 128.67, 127.81, 125.61, 124.91, 123.97, 123.01, 120.76, 117.37, 110.21, 95.91, 34.61, 30.48, 18.75; HRMS

(ESI+) ( $m/z$ ) calcd for  $\text{C}_{30}\text{H}_{35}\text{NO}_2[\text{M}]^+$  441.2662 found 441.2664.

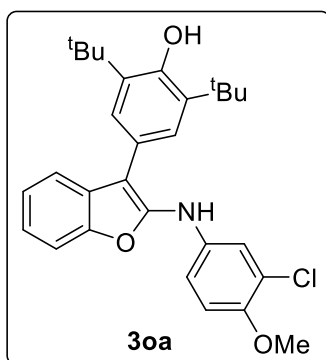

**(3oa):** Reaction time: (20 min); Brown solid (35.8 mg, 75%);  $R_f = 0.5$  (petroleum ether/ethyl acetate = 95/05);  $^1\text{H NMR}$  (500 MHz,  $\text{CDCl}_3$ )  $\delta$  7.62 (d,  $J = 6.8$  Hz, 1H), 7.44 (d,  $J = 7.2$  Hz, 1H), 7.34 (s, 2H), 7.30 – 7.21 (m, 2H), 7.02 (s, 1H), 6.83 (s, 2H), 5.97 (s, 1H), 5.26 (s, 1H), 3.85 (s, 3H), 1.44 (s, 18H);  $^{13}\text{C NMR}$  (126 MHz,  $\text{CDCl}_3$ )  $\delta$  152.97, 150.98, 149.94, 147.86, 136.63, 129.29, 125.04, 123.28, 123.15, 123.01, 122.88, 118.94, 118.76, 115.72, 113.39,

110.84, 104.76, 56.84, 34.56, 30.40; HRMS (ESI+) ( $m/z$ ) calcd for  $\text{C}_{29}\text{H}_{32}\text{ClNO}_3$   $[\text{M}]^+$  477.2065 found 477.2065.

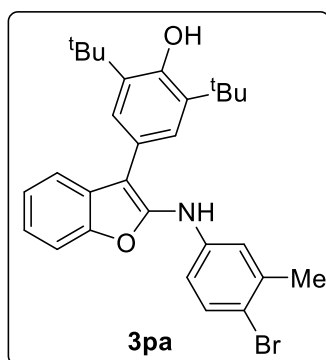

**(3pa):** Reaction time: (20 min); liquid (43.0 mg, 85%);  $R_f = 0.5$  (petroleum ether/ethyl acetate = 95/05);  $^1\text{H NMR}$  (500 MHz,  $\text{CDCl}_3$ )  $\delta$  7.33 (d,  $J = 9.1$  Hz, 3H), 7.18 (d,  $J = 8.8$  Hz, 2H), 7.12 (d,  $J = 2.5$  Hz, 1H), 6.88 (d,  $J = 8.8$  Hz, 2H), 6.84 (dd,  $J = 8.8, 2.6$  Hz, 1H), 6.07 (s, 1H), 5.27 (s, 1H), 3.84 (s, 3H), 1.42 (s, 18H);  $^{13}\text{C NMR}$  (126 MHz,  $\text{CDCl}_3$ )  $\delta$  156.38, 153.05, 147.93, 145.95, 141.50, 136.74, 129.56, 129.33, 124.95, 117.02, 111.37, 111.13, 106.33, 102.48,

56.02, 34.59, 30.40; HRMS of oxidized product of **3pa** (ESI+) ( $m/z$ ) calcd for  $\text{C}_{29}\text{H}_{32}\text{BrNO}_2$   $[\text{M}+\text{H}]^+$  504.1333 found 504.1546.



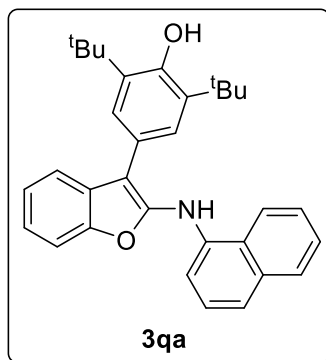

**(3qa):** Reaction time: (20 min); Brown solid (32.8 mg, 71%); mp 180-181 °C;  $R_f = 0.5$  (petroleum ether/ethyl acetate = 95/05);  $^1\text{H}$  NMR (400 MHz,  $\text{CDCl}_3$ )  $\delta$  7.98 – 7.87 (m, 1H), 7.87 – 7.78 (m, 1H), 7.66 (d,  $J = 7.1$  Hz, 1H), 7.53 – 7.39 (m, 4H), 7.37 (s, 2H), 7.33 – 7.19 (m, 3H), 7.11 (d,  $J = 7.5$  Hz, 1H), 6.58 (s, 1H), 5.18 (s, 1H), 1.31 (s, 18H);  $^{13}\text{C}$  NMR (101 MHz,  $\text{CDCl}_3$ )  $\delta$  152.97, 151.32, 148.44, 138.14, 136.64, 134.52, 129.31, 128.89, 126.20, 126.13, 125.80, 124.93, 124.87, 123.22, 123.12, 122.97, 121.85, 120.41, 119.09, 112.17, 110.97, 105.91, 34.50, 30.30; HRMS (ESI+) ( $m/z$ ) calcd for  $\text{C}_{32}\text{H}_{33}\text{NO}_2$   $[\text{M}+\text{H}]^+$  464.2584 found 464.2575.

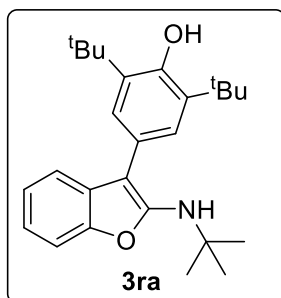

**(3ra):** Reaction time: (20 min); liquid (26.4 mg, 67%); mp 147-149 °C;  $R_f = 0.5$  (petroleum ether/ethyl acetate = 95/05);  $^1\text{H}$  NMR (500 MHz,  $\text{CDCl}_3$ )  $\delta$  7.47 (d,  $J = 7.4$  Hz, 1H), 7.36 (d,  $J = 9.2$  Hz, 3H), 7.18 (dd,  $J = 11.0, 3.9$  Hz, 1H), 7.12 – 7.07 (m, 1H), 5.23 (s, 1H), 4.30 (s, 1H), 1.52 (s, 18H), 1.45 (s, 9H);  $^{13}\text{C}$  NMR (126 MHz,  $\text{CDCl}_3$ )  $\delta$  154.91, 152.19, 150.61, 136.72, 130.02, 124.63, 122.80, 120.54, 117.20, 110.06, 98.08, 53.40, 34.71, 30.73, 30.57; HRMS (ESI+) ( $m/z$ ) calcd for  $\text{C}_{26}\text{H}_{35}\text{NO}_2$   $[\text{M}]^+$  393.2662 found 393.2661.

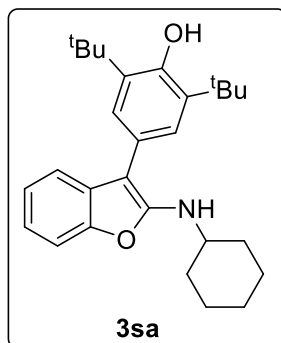

**(3sa):** Reaction time: (20 min); Brown solid (26.8 mg, 64%);  $R_f = 0.5$  (petroleum ether/ethyl acetate = 95/05);  $^1\text{H}$  NMR (500 MHz,  $\text{CDCl}_3$ )  $\delta$  7.44 – 7.39 (m, 1H), 7.34 (s, 2H), 7.29 (d,  $J = 8.0$  Hz, 1H), 7.15 – 7.09 (m, 1H), 7.03 – 6.96 (m, 1H), 5.18 (s, 1H), 4.23 (d,  $J = 8.6$  Hz, 1H), 3.79 – 3.24 (m, 1H), 2.07 (d,  $J = 12.1$  Hz, 2H), 1.74 (d,  $J = 13.6$  Hz, 2H), 1.62 (d,  $J = 15.9$  Hz, 2H), 1.48 (s, 18H), 1.42 – 1.37 (m, 4H);  $^{13}\text{C}$  NMR (126 MHz,  $\text{CDCl}_3$ )  $\delta$  154.57, 151.97, 150.18, 136.71, 130.80, 124.74, 124.48, 122.88, 119.92, 116.70, 109.80, 94.19, 52.83, 34.70, 34.50, 30.54, 25.82, 25.05; HRMS of **3sa**(ESI+) ( $m/z$ ) calcd for  $\text{C}_{28}\text{H}_{37}\text{NO}_2$   $[\text{M}+\text{H}]^+$  420.2897 found 420.2887.

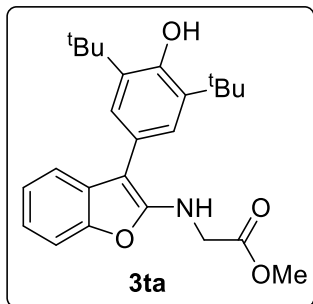

**(3ta):** Reaction time: (120 min); liquid (24.7 mg, 60%);  $R_f = 0.5$  (petroleum ether/ethyl acetate = 95/05);  $^1\text{H NMR}$  (500 MHz,  $\text{CDCl}_3$ )  $\delta$  7.48 (d,  $J = 7.6$  Hz, 1H), 7.42 (s, 2H), 7.32 (d,  $J = 8.0$  Hz, 1H), 7.21 – 7.15 (m, 1H), 7.10 – 7.04 (m, 1H), 5.24 (s, 1H), 4.99 (t,  $J = 5.8$  Hz, 1H), 4.20 (d,  $J = 5.9$  Hz, 2H), 3.79 (s, 3H), 1.52 (s, 18H);  $^{13}\text{C NMR}$  (126 MHz,  $\text{CDCl}_3$ )  $\delta$  171.29, 153.25, 152.26, 150.10, 136.81, 130.64, 124.52, 124.02, 123.12, 120.43, 117.30, 109.98, 94.75, 52.51, 45.39, 34.68, 30.52; HRMS (ESI+) ( $m/z$ ) calcd for  $\text{C}_{25}\text{H}_{31}\text{NO}_4$   $[\text{M}+\text{H}]^+$  410.2326 found 410.2325.

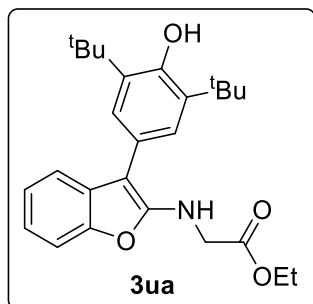

**(3ua):** Reaction time: (120 min); Yellow solid (30.4 mg, 72%); mp 136-137 °C;  $R_f = 0.5$  (petroleum ether/ethyl acetate = 95/05);  $^1\text{H NMR}$  (500 MHz,  $\text{CDCl}_3$ )  $\delta$  7.49 (d,  $J = 7.6$  Hz, 1H), 7.42 (s, 2H), 7.32 (d,  $J = 8.0$  Hz, 1H), 7.22 – 7.15 (m, 1H), 7.11 – 7.04 (m, 1H), 5.24 (s, 1H), 5.01 (t,  $J = 5.7$  Hz, 1H), 4.25 (q,  $J = 7.1$  Hz, 2H), 4.19 (d,  $J = 5.8$  Hz, 2H), 1.52 (s, 18H), 1.30 (t,  $J = 7.1$  Hz, 3H);  $^{13}\text{C NMR}$  (126 MHz,  $\text{CDCl}_3$ )  $\delta$  170.76, 153.37, 152.23, 150.10, 136.79, 130.63, 124.49, 124.07, 123.10, 120.39, 117.28, 109.95, 94.66, 61.60, 45.59, 34.68, 30.52, 14.31; HRMS (ESI+) ( $m/z$ ) calcd for  $\text{C}_{31}\text{H}_{34}\text{N}_2\text{O}_2$   $[\text{M}+\text{H}]^+$  424.2488 found 424.2484; HRMS (ESI+) ( $m/z$ ) calcd for  $\text{C}_{26}\text{H}_{33}\text{NO}_4$   $[\text{M}+\text{H}]^+$  424.2482 found 424.2483.

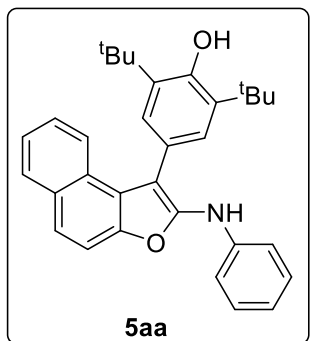

**(5aa):** Reaction time: (20 min); Brown solid (35.3 mg, 76%); mp 162-163 °C;  $R_f = 0.4$  (petroleum ether/ethyl acetate = 95/05);  $^1\text{H NMR}$  (500 MHz,  $\text{CDCl}_3$ )  $\delta$  8.05 (d,  $J = 8.4$  Hz, 1H), 7.91 (d,  $J = 8.1$  Hz, 1H), 7.67 (d,  $J = 8.9$  Hz, 1H), 7.63 (d,  $J = 8.8$  Hz, 1H), 7.43 – 7.37 (m, 1H), 7.36 – 7.29 (m, 3H), 7.26 – 7.22 (m, 2H), 7.00 (d,  $J = 7.9$  Hz, 2H), 6.93 – 6.88 (m, 1H), 5.95 (s, 1H), 5.31 (s, 1H), 1.42 (s, 18H);  $^{13}\text{C NMR}$  (126 MHz,  $\text{CDCl}_3$ )  $\delta$  153.56, 148.50, 148.04, 143.78, 136.38, 131.10, 129.45, 129.05, 127.91, 127.23, 125.34, 124.24, 123.77, 123.70, 123.54, 122.72, 120.88, 115.81, 112.13, 108.77, 34.59, 30.51; HRMS (ESI+) ( $m/z$ ) calcd for  $\text{C}_{32}\text{H}_{33}\text{NO}_2$   $[\text{M}]^+$  463.2506 found 463.2507.

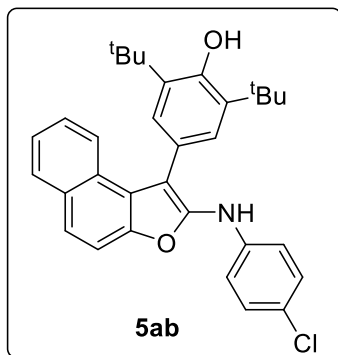

**(5ab):** Reaction time: (20 min); liquid (43.8 mg, 88%);  $R_f = 0.4$  (petroleum ether/ethyl acetate = 95/05);  $^1\text{H NMR}$  (500 MHz,  $\text{CDCl}_3$ )  $\delta$  8.04 (d,  $J = 8.4$  Hz, 1H), 7.93 (d,  $J = 8.1$  Hz, 1H), 7.70 (d,  $J = 8.9$  Hz, 1H), 7.64 (d,  $J = 8.9$  Hz, 1H), 7.46 – 7.39 (m, 1H), 7.37 – 7.30 (m, 3H), 7.21 (d,  $J = 8.8$  Hz, 2H), 6.93 (d,  $J = 8.8$  Hz, 2H), 5.95 (s, 1H), 5.35 (s, 1H), 1.44 (s, 18H);  $^{13}\text{C NMR}$  (126 MHz,  $\text{CDCl}_3$ )  $\delta$  153.66, 148.13, 147.79, 142.45, 136.45, 131.10, 129.34,

129.08, 127.94, 127.16, 125.63, 125.47, 124.35, 124.13, 123.64, 123.30, 122.60, 116.92, 112.09, 109.48, 34.59, 30.50; HRMS of oxidized product of **5ab** (ESI+) ( $m/z$ ) calcd for  $\text{C}_{32}\text{H}_{32}\text{ClNO}_2$   $[\text{M}+\text{H}]^+$  496.2038 found 496.2035.

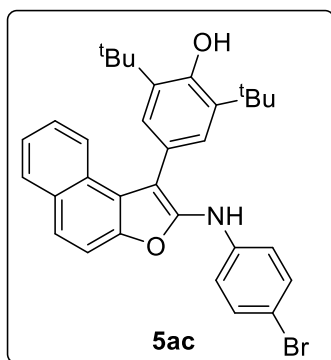

**(5ac):** Reaction time: (20 min); liquid (46.7 mg, 86%);  $R_f = 0.4$  (petroleum ether/ethyl acetate = 95/05);  $^1\text{H NMR}$  (500 MHz,  $\text{CDCl}_3$ )  $\delta$  8.04 (d,  $J = 8.4$  Hz, 1H), 7.93 (d,  $J = 8.2$  Hz, 1H), 7.70 (d,  $J = 8.9$  Hz, 1H), 7.64 (d,  $J = 8.8$  Hz, 1H), 7.42 (dd,  $J = 7.9, 7.0$  Hz, 1H), 7.36 – 7.32 (m, 5H), 6.87 (d,  $J = 8.8$  Hz, 2H), 5.96 (s, 1H), 5.34 (s, 1H), 1.43 (s, 18H);  $^{13}\text{C NMR}$  (126 MHz,  $\text{CDCl}_3$ )  $\delta$  153.67, 148.16, 147.65, 142.96, 136.46, 132.24, 131.11, 129.09, 127.95, 127.16,

125.49, 124.36, 124.18, 123.64, 123.28, 122.58, 117.33, 112.84, 112.10, 109.65, 34.60, 30.51; HRMS of oxidized product of **5ac** (ESI+) ( $m/z$ ) calcd for  $\text{C}_{32}\text{H}_{32}\text{BrNO}_2$   $[\text{M}+\text{H}]^+$  540.1533 found 540.1535.

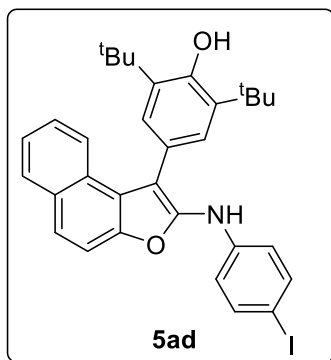

**(5ad):** Reaction time: (20 min); liquid (51.4 mg, 87%);  $R_f = 0.4$  (petroleum ether/ethyl acetate = 95/05);  $^1\text{H NMR}$  (500 MHz,  $\text{CDCl}_3$ )  $\delta$  8.08 (d,  $J = 8.4$  Hz, 1H), 7.96 (d,  $J = 8.0$  Hz, 1H), 7.73 (d,  $J = 8.9$  Hz, 1H), 7.67 (d,  $J = 8.9$  Hz, 1H), 7.55 (d,  $J = 8.7$  Hz, 2H), 7.47 – 7.44 (m, 1H), 7.38 (d,  $J = 11.7$  Hz, 3H), 6.80 (d,  $J = 8.7$  Hz, 2H), 5.99 (s, 1H), 5.38 (s, 1H), 1.47 (s, 18H);  $^{13}\text{C NMR}$  (126 MHz,  $\text{CDCl}_3$ )  $\delta$  153.66, 148.17, 147.48, 143.61, 138.12, 136.44, 131.09,

129.08, 127.94, 127.15, 125.49, 124.35, 124.21, 123.62, 123.25, 122.55, 117.79, 112.09, 109.80, 82.43, 34.58, 30.50; HRMS of oxidized product of **5ad** (ESI+) ( $m/z$ ) calcd for  $C_{32}H_{32}INO_2$   $[M+H]^+$  588.1395 found 588.1398.

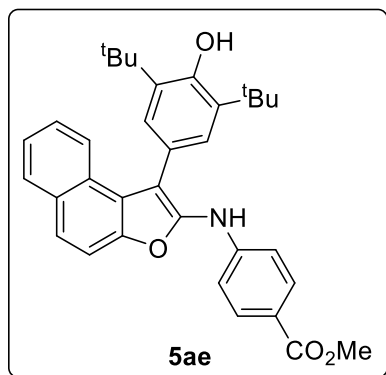

**(5ae):** Reaction time: (20 min); Brown solid (35.5 mg, 68%); mp 207-208 °C;  $R_f$  = 0.7 (petroleum ether/ethyl acetate = 95/05);  $^1H$  NMR (500 MHz,  $CDCl_3$ )  $\delta$  8.08 (d,  $J$  = 8.0 Hz, 1H), 7.96 (d,  $J$  = 6.9 Hz, 3H), 7.74 (d,  $J$  = 8.5 Hz, 1H), 7.67 (d,  $J$  = 8.7 Hz, 1H), 7.47 – 7.32 (m, 4H), 6.98 (d,  $J$  = 8.0 Hz, 2H), 6.23 (s, 1H), 5.36 (s, 1H), 3.89 (s, 3H), 1.43 (s, 18H);  $^{13}C$  NMR (126 MHz,  $CDCl_3$ )  $\delta$  167.10, 153.74, 148.50, 148.28, 146.44, 136.44, 131.56, 131.08, 129.12, 128.05, 127.08, 125.63, 124.73, 124.44, 123.60, 123.04, 122.32, 121.95, 114.39, 112.18, 111.56, 51.92, 34.57, 30.47; HRMS (ESI+) ( $m/z$ ) calcd for  $C_{34}H_{35}NO_4$   $[M+H]^+$  522.2639 found 522.2633.

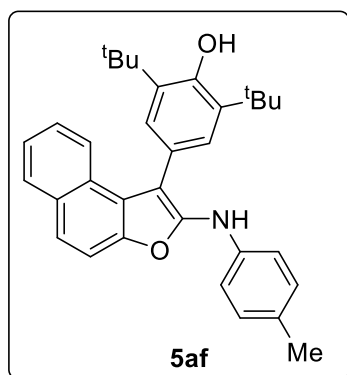

**(5af):** Reaction time: (20 min); liquid (41.7 mg, 87%);  $R_f$  = 0.4 (petroleum ether/ethyl acetate = 95/05);  $^1H$  NMR (400 MHz,  $CDCl_3$ )  $\delta$  8.02 (d,  $J$  = 8.4 Hz, 1H), 7.91 (d,  $J$  = 7.7 Hz, 1H), 7.67 – 7.61 (m, 2H), 7.40 (ddd,  $J$  = 8.2, 6.9, 1.2 Hz, 1H), 7.35 (s, 2H), 7.31 (ddd,  $J$  = 8.3, 6.9, 1.3 Hz, 1H), 7.07 (d,  $J$  = 8.2 Hz, 2H), 6.95 (d,  $J$  = 8.5 Hz, 2H), 5.93 (s, 1H), 5.32 (s, 1H), 2.29 (s, 3H), 1.44 (s, 18H);  $^{13}C$  NMR (126 MHz,  $CDCl_3$ )  $\delta$  153.50, 149.21, 147.78, 140.90, 136.39, 131.12, 130.43, 129.91, 129.58, 129.01, 127.80, 127.28, 125.21, 124.17, 123.72, 123.31, 122.92, 116.30, 112.06, 107.20, 34.59, 30.53, 20.74; HRMS (ESI+) ( $m/z$ ) calcd for  $C_{33}H_{35}NO_2$   $[M]^+$  477.2662 found 477.2654.

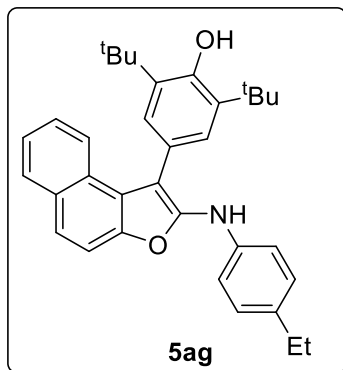

**(5ag):** Reaction time: (20 min); liquid (37.4 mg, 76%);  $R_f = 0.4$  (petroleum ether/ethyl acetate = 95/05);  $^1\text{H}$  NMR (500 MHz,  $\text{CDCl}_3$ )  $\delta$  8.04 (d,  $J = 8.3$  Hz, 1H), 7.92 (d,  $J = 8.0$  Hz, 1H), 7.65 (q,  $J = 8.8$  Hz, 2H), 7.43 – 7.38 (m, 1H), 7.38 – 7.30 (m, 3H), 7.10 (d,  $J = 8.2$  Hz, 2H), 6.97 (d,  $J = 8.2$  Hz, 2H), 5.95 (s, 1H), 5.32 (s, 1H), 2.59 (q,  $J = 7.5$  Hz, 2H), 1.44 (s, 18H), 1.21 (t,  $J = 7.5$  Hz, 3H);  $^{13}\text{C}$  NMR (126 MHz,  $\text{CDCl}_3$ )  $\delta$  153.49, 149.17, 147.80, 141.18, 137.01, 136.38, 131.11, 129.02, 128.75, 128.42, 127.82, 127.28, 125.22, 124.17, 123.72, 123.35, 122.91, 116.27, 112.07, 107.40, 34.59, 30.52, 28.25, 16.06; HRMS of oxidized product of **5ag** (ESI+) ( $m/z$ ) calcd for  $\text{C}_{34}\text{H}_{37}\text{NO}_2$   $[\text{M}+\text{H}]^+$  490.2741 found 490.2741.

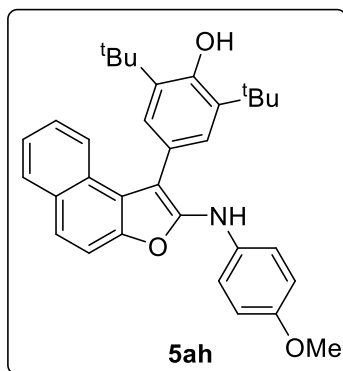

**(5ah):** Reaction time: (20 min); liquid (36.1 mg, 73%);  $R_f = 0.4$  (petroleum ether/ethyl acetate = 95/05);  $^1\text{H}$  NMR (500 MHz,  $\text{CDCl}_3$ )  $\delta$  8.04 (d,  $J = 8.3$  Hz, 1H), 7.92 (d,  $J = 8.0$  Hz, 1H), 7.68 – 7.60 (m, 2H), 7.41 (t,  $J = 7.4$  Hz, 1H), 7.37 (s, 2H), 7.32 (dd,  $J = 11.0, 4.0$  Hz, 1H), 7.03 (d,  $J = 8.9$  Hz, 2H), 6.85 (d,  $J = 8.8$  Hz, 2H), 5.91 (s, 1H), 5.34 (s, 1H), 3.79 (s, 3H), 1.47 (s, 18H);  $^{13}\text{C}$  NMR (126 MHz,  $\text{CDCl}_3$ )  $\delta$  154.66, 153.47, 149.78, 147.57, 136.66, 136.42, 131.13, 129.00, 127.72, 127.30, 125.15, 124.15, 123.73, 123.08, 123.04, 118.21, 114.81, 111.98, 106.04, 55.80, 34.59, 30.53; HRMS (ESI+) ( $m/z$ ) calcd for  $\text{C}_{33}\text{H}_{35}\text{NO}_3$   $[\text{M}]^+$  493.2611 found 493.2611.

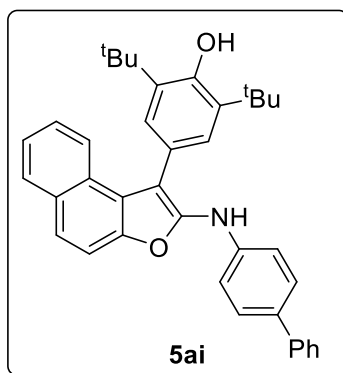

**(5ai):** Reaction time: (20 min); liquid (49.3 mg, 91%);  $R_f = 0.4$  (petroleum ether/ethyl acetate = 95/05);  $^1\text{H}$  NMR (500 MHz,  $\text{CDCl}_3$ )  $\delta$  7.96 (d,  $J = 7.1$  Hz, 1H), 7.83 (d,  $J = 7.3$  Hz, 1H), 7.58 (dd,  $J = 21.2, 8.3$  Hz, 2H), 7.35 – 7.20 (m, 7H), 7.17 – 7.06 (m, 5H), 6.87 (s, 1H), 6.04 (s, 1H), 5.18 (s, 1H), 1.29 (s, 18H);  $^{13}\text{C}$  NMR (126 MHz,  $\text{CDCl}_3$ )  $\delta$  153.50, 148.23, 148.17, 141.16, 138.78, 136.17, 131.02, 130.53, 129.38, 129.13, 129.03, 128.95, 128.75,

128.70, 127.99, 127.67, 126.97, 125.40, 124.25, 124.06, 123.71, 123.39, 122.70, 120.64, 115.25, 112.18, 110.64, 77.41, 77.16, 76.91, 34.49, 30.45; HRMS (ESI+) ( $m/z$ ) calcd for  $C_{38}H_{37}NO_2$   $[M+H]^+$  540.2902 found 540.2905.

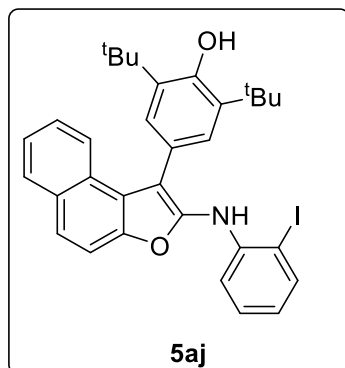

**(5aj):** Reaction time: (20 min); liquid (50.1 mg, 85%);  $R_f = 0.4$  (petroleum ether/ethyl acetate = 95/05);  $^1H$  NMR (500 MHz,  $CDCl_3$ )  $\delta$  8.17 (d,  $J = 8.4$  Hz, 1H), 7.95 (d,  $J = 8.1$  Hz, 1H), 7.76 – 7.70 (m, 2H), 7.67 (d,  $J = 8.9$  Hz, 1H), 7.44 (dd,  $J = 11.1, 3.8$  Hz, 1H), 7.39 – 7.35 (m, 3H), 7.23 – 7.19 (m, 1H), 7.16 (dd,  $J = 8.1, 1.3$  Hz, 1H), 6.65 – 6.60 (m, 1H), 6.51 (s, 1H), 5.32 (s, 1H), 1.46 (s, 18H);  $^{13}C$  NMR (126 MHz,  $CDCl_3$ )  $\delta$  153.58, 148.29, 147.48, 143.58, 139.10, 136.31, 131.09, 129.49, 129.08, 128.02, 126.92, 125.50, 124.38, 124.33, 123.78, 123.07, 122.43, 122.14, 115.37, 112.13, 110.45, 85.92, 77.41, 77.16, 76.91, 34.58, 30.51; HRMS (ESI+) ( $m/z$ ) calcd for  $C_{32}H_{32}INO_2$   $[M]^+$  589.1472 found 589.1481.

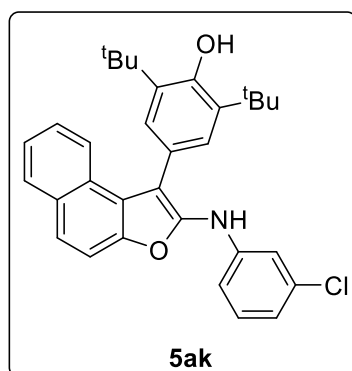

**(5ak):** Reaction time: (20 min); liquid (36.6 mg, 73%);  $R_f = 0.4$  (petroleum ether/ethyl acetate = 95/05);  $^1H$  NMR (500 MHz,  $CDCl_3$ )  $\delta$  8.04 (d,  $J = 8.4$  Hz, 1H), 7.93 (d,  $J = 8.1$  Hz, 1H), 7.71 (d,  $J = 8.9$  Hz, 1H), 7.66 (d,  $J = 8.9$  Hz, 1H), 7.44 – 7.40 (m, 1H), 7.36 – 7.33 (m, 1H), 7.32 (s, 2H), 7.17 – 7.13 (m, 1H), 6.98 – 6.96 (m, 1H), 6.87 (dd,  $J = 7.7, 1.5$  Hz, 1H), 6.83 (dd,  $J = 8.1, 1.8$  Hz, 1H), 5.96 (s, 1H), 5.33 (s, 1H), 1.42 (s, 17H);  $^{13}C$  NMR (126 MHz,  $CDCl_3$ )  $\delta$  153.69, 148.32, 147.23, 145.20, 136.44, 135.21, 131.11, 130.40, 129.11, 128.14, 128.03, 127.13, 125.55, 124.39, 123.64, 123.22, 122.51, 120.71, 115.52, 113.80, 112.19, 110.48, 34.60, 30.50; HRMS (ESI+) ( $m/z$ ) calcd for  $C_{32}H_{32}ClNO_2$   $[M]^+$  497.2116 found 497.2117.

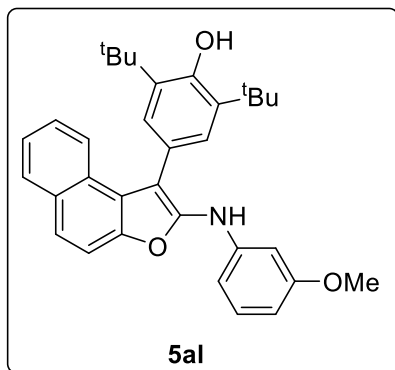

**(5al):** Reaction time: (20 min); Brown solid (40.5 mg, 82%); mp 192-194 °C;  $R_f = 0.4$  (petroleum ether/ethyl acetate = 95/05);  $^1\text{H}$  NMR (500 MHz,  $\text{CDCl}_3$ )  $\delta$  8.07 (d,  $J = 8.3$  Hz, 1H), 7.93 (d,  $J = 8.1$  Hz, 1H), 7.67 (dd,  $J = 19.8, 8.8$  Hz, 2H), 7.46 – 7.40 (m, 1H), 7.40 – 7.31 (m, 3H), 7.20 – 7.13 (m, 1H), 6.59 (d,  $J = 9.0$  Hz, 2H), 6.49 (d,  $J = 7.9$  Hz, 1H), 5.97 (s, 1H), 5.33 (s, 1H), 3.78 (s, 3H), 1.44 (s, 18H);  $^{13}\text{C}$  NMR (126 MHz,  $\text{CDCl}_3$ )  $\delta$  160.85, 153.57, 148.23, 148.13, 145.14, 136.35, 131.09, 130.22, 129.06, 127.94, 127.22, 125.36, 124.25, 123.89, 123.70, 123.48, 122.64, 112.16, 109.18, 108.55, 106.15, 101.89, 55.38, 34.59, 30.51; HRMS (ESI+) ( $m/z$ ) calcd for  $\text{C}_{33}\text{H}_{35}\text{NO}_3$   $[\text{M}]^+$  494.2690 found 494.2664.

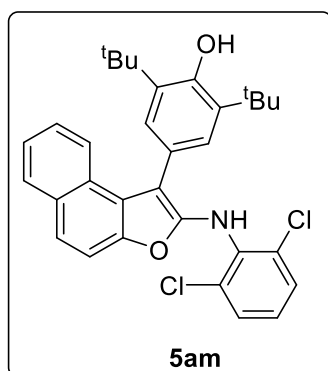

**(5am):** Reaction time: (20 min); Brown solid (35.8 mg, 67%); mp 175-176 °C;  $R_f = 0.4$  (petroleum ether/ethyl acetate = 95/05);  $^1\text{H}$  NMR (500 MHz,  $\text{CDCl}_3$ )  $\delta$  7.91 (d,  $J = 8.1$  Hz, 1H), 7.86 (d,  $J = 8.4$  Hz, 1H), 7.67 (d,  $J = 8.9$  Hz, 1H), 7.61 (d,  $J = 8.9$  Hz, 1H), 7.41 – 7.36 (m, 1H), 7.29 (d,  $J = 7.8$  Hz, 1H), 7.25 (d,  $J = 8.1$  Hz, 2H), 7.09 (d,  $J = 8.1$  Hz, 2H), 6.79 – 6.72 (m, 1H), 6.27 (s, 1H), 5.17 (s, 1H), 1.42 (s, 18H);  $^{13}\text{C}$  NMR (126 MHz,  $\text{CDCl}_3$ )  $\delta$  153.27, 147.75, 146.99, 136.08, 135.68, 131.03, 128.95, 128.61, 128.15, 127.03, 126.98, 125.55, 125.42, 124.16, 123.88, 123.57, 123.28, 123.03, 112.09, 109.39, 34.43, 30.42; HRMS (ESI+) ( $m/z$ ) calcd for  $\text{C}_{32}\text{H}_{31}\text{Cl}_2\text{NO}_2$   $[\text{M}]^+$  531.1726 found 531.1735.

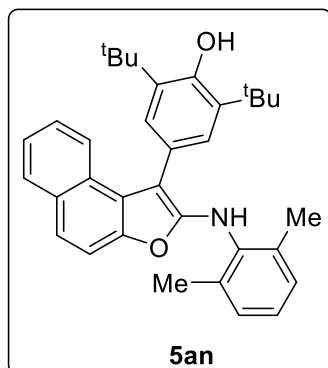

**(5an):** Reaction time: (20 min); liquid (33.4 mg, 68%);  $R_f = 0.4$  (petroleum ether/ethyl acetate = 95/05);  $^1\text{H}$  NMR (500 MHz,  $\text{CDCl}_3$ )  $\delta$  7.88 (dd,  $J = 7.7, 5.7$  Hz, 2H), 7.54 – 7.50 (m, 2H), 7.39 – 7.33 (m, 3H), 7.29 – 7.25 (m, 1H), 7.05 – 7.00 (m, 3H), 5.69 (s, 1H), 5.27 (s, 1H), 2.28 (s, 6H), 1.48 (s, 18H);  $^{13}\text{C}$  NMR (126 MHz,  $\text{CDCl}_3$ )  $\delta$  153.13, 152.00, 146.50, 137.26, 136.17, 134.10, 131.19, 128.83, 128.62, 127.87, 127.29, 125.46, 124.78, 124.40, 124.10, 123.93,

123.76, 121.32, 111.65, 99.67, 34.54, 30.53, 18.72; HRMS (ESI+) ( $m/z$ ) calcd for  $C_{34}H_{37}NO_2$   $[M]^+$  491.2819 found 491.2827.

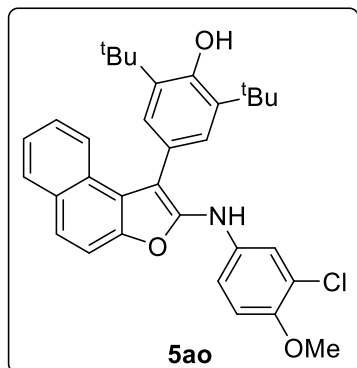

**(5ao):** Reaction time: (20 min); liquid(32.8 mg, 62%);  $R_f = 0.4$  (petroleum ether/ethyl acetate = 95/05);  $^1H$  NMR (500 MHz,  $CDCl_3$ )  $\delta$  8.04 (d,  $J = 8.4$  Hz, 1H), 7.93 (d,  $J = 8.1$  Hz, 1H), 7.66 (dd,  $J = 19.7, 8.9$  Hz, 2H), 7.44 – 7.40 (m, 2H), 7.34 (d,  $J = 5.0$  Hz, 3H), 7.08 (d,  $J = 2.6$  Hz, 1H), 6.84 (d,  $J = 8.8$  Hz, 1H), 5.86 (s, 1H), 5.34 (s, 1H), 3.86 (s, 3H), 1.45 (s, 18H);  $^{13}C$  NMR (126 MHz,  $CDCl_3$ )  $\delta$  153.47, 149.78, 148.47, 147.74, 137.43, 136.32, 131.01, 128.94, 127.74, 127.09, 125.24, 124.16, 123.56, 123.31, 123.19, 122.74, 121.74, 118.60, 115.57, 113.38, 111.93, 107.71, 56.76, 34.47, 30.40; HRMS (ESI+) ( $m/z$ ) calcd for  $C_{33}H_{34}ClNO_3$   $[M+H]^+$  528.2300 found 528.2298.

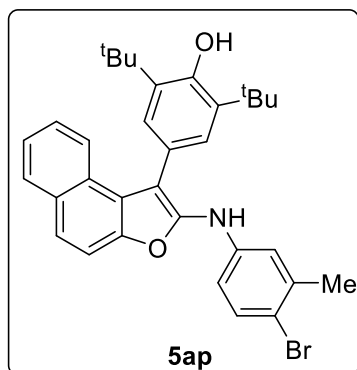

**(5ap):** Reaction time: (20 min); Brown solid (33.8 mg, 61%); mp 193-194 °C;  $R_f = 0.4$  (petroleum ether/ethyl acetate = 95/05);  $^1H$  NMR (500 MHz,  $CDCl_3$ )  $\delta$  8.06 (d,  $J = 8.4$  Hz, 1H), 7.94 (d,  $J = 8.1$  Hz, 1H), 7.70 (d,  $J = 8.9$  Hz, 1H), 7.65 (d,  $J = 8.8$  Hz, 1H), 7.45 – 7.41 (m, 1H), 7.37 (d,  $J = 8.7$  Hz, 1H), 7.34 (s, 3H), 6.85 (d,  $J = 2.7$  Hz, 1H), 6.72 (dd,  $J = 8.6, 2.7$  Hz, 1H), 5.89 (s, 1H), 5.34 (s, 1H), 2.33 (s, 3H), 1.44 (s, 18H);  $^{13}C$  NMR (126 MHz,  $CDCl_3$ )  $\delta$  153.62, 148.13, 147.86, 143.03, 138.73, 136.40, 132.92, 131.10, 129.08, 127.95, 127.17, 125.46, 124.33, 124.08, 123.65, 123.35, 122.65, 117.99, 115.54, 114.98, 112.12, 109.47, 34.59, 30.50, 23.19; HRMS (ESI+) ( $m/z$ ) calcd for  $C_{33}H_{34}BrNO_2$   $[M+H]^+$  556.1846 found 556.1847.



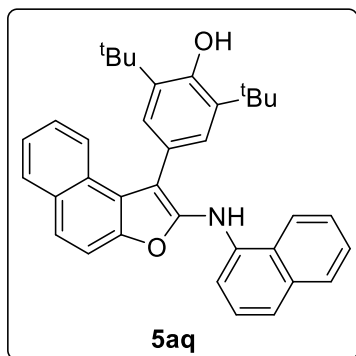

**(5aq):** Reaction time: (20 min); Brown solid (36.1 mg, 70%); mp 189-190 °C;  $R_f = 0.4$  (petroleum ether/ethyl acetate = 95/05);  $^1\text{H}$  NMR (500 MHz,  $\text{CDCl}_3$ )  $\delta$  8.14 (d,  $J = 8.4$  Hz, 1H), 7.95 (d,  $J = 8.1$  Hz, 1H), 7.90 (d,  $J = 7.7$  Hz, 1H), 7.88 – 7.84 (m, 1H), 7.52 – 7.46 (m, 3H), 7.46 – 7.42 (m, 1H), 7.37 (dd,  $J = 17.1, 9.0$  Hz, 4H), 6.56 (s, 1H), 5.29 (s, 1H), 1.39 (s,  $18\text{H}^{13}\text{C}$  NMR (126 MHz,  $\text{CDCl}_3$ )  $\delta$  153.51, 149.27, 148.06, 138.70, 136.40, 134.47, 131.15,

129.07, 128.85, 127.88, 126.99, 126.27, 126.10, 125.73, 125.33, 124.99, 124.27, 123.78, 123.62, 123.59, 122.89, 121.83, 120.48, 112.35, 112.14, 108.21, 34.52, 30.44; HRMS (ESI+) ( $m/z$ ) calcd for  $\text{C}_{36}\text{H}_{35}\text{NO}_2$   $[\text{M}+\text{H}]^+$  514.2741 found 514.2745.

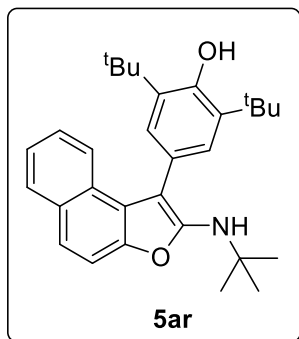

**(5ar):** Reaction time: (20 min); liquid (35.2 mg, 79%); mp 147-149 °C;  $R_f = 0.4$  (petroleum ether/ethyl acetate = 95/05);  $^1\text{H}$  NMR (500 MHz,  $\text{CDCl}_3$ )  $\delta$  7.91 (dd,  $J = 17.9, 8.2$  Hz, 2H), 7.58 (dd,  $J = 20.6, 8.7$  Hz, 2H), 7.41 – 7.32 (m, 3H), 7.28 (d,  $J = 7.5$  Hz, 1H), 5.32 (s, 1H), 4.00 (s, 1H), 1.51 (s, 18H), 1.41 (s, 9H);  $^{13}\text{C}$  NMR (126 MHz,  $\text{CDCl}_3$ )  $\delta$  155.32, 153.18, 147.24, 136.50, 131.11, 128.83, 127.36, 127.31, 124.71, 124.60, 123.84, 123.77, 123.46, 121.39, 111.73, 102.68, 53.60,

34.66, 30.65; HRMS (ESI+) ( $m/z$ ) calcd for  $\text{C}_{30}\text{H}_{37}\text{NO}_2$   $[\text{M}]^+$  443.2819 found 443.2821.

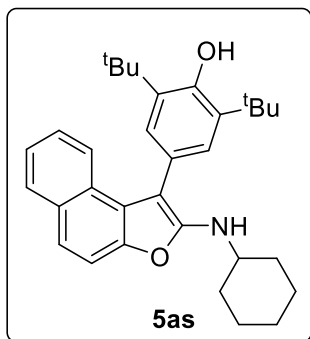

**(5as):** Reaction time: (20 min); Brown solid (35.8 mg, 76%); mp 166-168 °C;  $R_f = 0.4$  (petroleum ether/ethyl acetate = 95/05);  $^1\text{H}$  NMR (500 MHz,  $\text{CDCl}_3$ )  $\delta$  7.91 (d,  $J = 8.1$  Hz, 1H), 7.85 (d,  $J = 7.7$  Hz, 1H), 7.51 (dd,  $J = 29.8, 8.4$  Hz, 2H), 7.33 (s, 3H), 7.24 (d,  $J = 7.5$  Hz, 1H), 5.28 (s, 1H), 3.99 (s, 1H), 3.56 (s, 1H), 2.06 (d,  $J = 10.0$  Hz, 2H), 1.73 (d,  $J = 11.4$  Hz, 2H), 1.66 – 1.55 (m, 2H), 1.48 (s, 18H), 1.41 – 1.30 (m, 3H), 1.25 – 1.13 (m, 3H);  $^{13}\text{C}$  NMR (126 MHz,  $\text{CDCl}_3$ )  $\delta$  155.08,

153.03, 146.58, 136.44, 131.21, 128.80, 127.45, 127.13, 124.65, 124.47, 124.35, 123.89, 123.78, 120.50, 111.43, 98.13, 53.41, 34.65, 34.43, 30.64, 25.84, 25.10; HRMS of **5as**(ESI+) ( $m/z$ ) calcd for  $\text{C}_{32}\text{H}_{39}\text{NO}_2$   $[\text{M}]^+$  469.2975 found 469.2963.

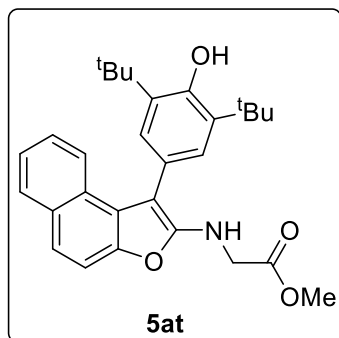

**(5at):** Reaction time: (20 min); Yellow solid (27.8 mg, 60%); mp 184-185 °C;  $R_f = 0.4$  (petroleum ether/ethyl acetate = 95/05);  $^1\text{H}$  NMR (500 MHz,  $\text{CDCl}_3$ )  $\delta$  7.95 (d,  $J = 7.7$  Hz, 1H), 7.86 (d,  $J = 7.4$  Hz, 1H), 7.57 – 7.45 (m, 2H), 7.43 – 7.31 (m, 3H), 7.29 – 7.22 (m, 1H), 5.30 (s, 1H), 4.75 (s, 1H), 4.16 (d,  $J = 4.7$  Hz, 2H), 3.76 (s, 3H), 1.49 (s, 18H);  $^{13}\text{C}$  NMR (126 MHz,  $\text{CDCl}_3$ )  $\delta$  171.41, 153.74, 153.19, 146.48, 136.67, 136.51, 131.26, 128.82, 127.34, 124.64, 124.33, 123.99, 123.94, 123.92, 120.95, 111.42, 97.82, 52.45, 45.62, 34.64, 30.61; HRMS (ESI+) ( $m/z$ ) calcd for  $\text{C}_{29}\text{H}_{33}\text{NO}_4$   $[\text{M}+\text{H}]^+$  460.2482 found 460.2481.

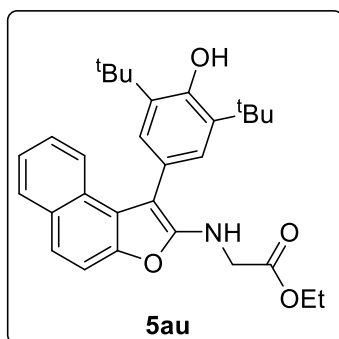

**(5au):** Reaction time: (20 min); liquid (33.8 mg, 71%);  $R_f = 0.4$  (petroleum ether/ethyl acetate = 95/05);  $^1\text{H}$  NMR (500 MHz,  $\text{CDCl}_3$ )  $\delta$  7.96 (d,  $J = 8.3$  Hz, 1H), 7.86 (d,  $J = 8.0$  Hz, 1H), 7.56 – 7.47 (m, 2H), 7.42 – 7.32 (m, 3H), 7.27 – 7.22 (m, 1H), 5.30 (s, 1H), 4.77 (s, 1H), 4.21 (q,  $J = 6.82$ , 2H), 4.15 (d,  $J = 5.7$  Hz, 2H), 1.49 (s, 18H), 1.26 (t,  $J = 6.8$  Hz, 3H);  $^{13}\text{C}$  NMR (126 MHz,  $\text{CDCl}_3$ )  $\delta$  170.90, 153.85, 153.16, 146.47, 136.49, 131.26, 128.82, 127.31, 124.60, 124.33, 124.04, 123.93, 120.88, 111.41, 97.70, 61.51, 45.79, 34.64, 30.61, 14.33; HRMS (ESI+) ( $m/z$ ) calcd for  $\text{C}_{30}\text{H}_{35}\text{NO}_4$   $[\text{M}+\text{H}]^+$  474.2639 found 474.2635.

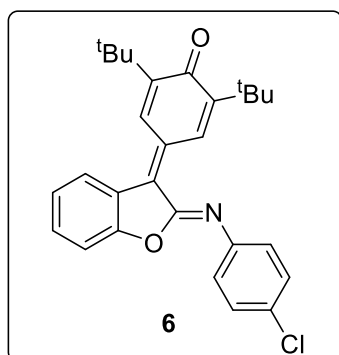

**(6):** Reaction time: (10 min); Maroon liquid (39.6 mg, 88%);  $R_f = 0.4$  (petroleum ether/ethyl acetate = 97/03);  $^1\text{H}$  NMR (400 MHz,  $\text{CDCl}_3$ )  $\delta$  9.33 (d,  $J = 2.3$  Hz, 1H), 7.91 (d,  $J = 2.2$  Hz, 1H), 7.87 (d,  $J = 8.0$  Hz, 1H), 7.45 – 7.35 (m, 5H), 7.25 – 7.20 (m, 1H), 7.13 (d,  $J = 8.1$  Hz, 1H), 1.39 (d,  $J = 12.3$  Hz, 18H);  $^{13}\text{C}$  NMR (101 MHz,  $\text{CDCl}_3$ )  $\delta$  186.86, 156.91, 154.43, 150.83, 150.62, 143.49, 135.62, 132.11, 131.51, 130.43, 129.66, 129.16, 128.06, 126.18, 125.86, 124.60, 124.38, 111.47, 36.32, 36.21, 29.97, 29.96; HRMS of **6** (ESI+) ( $m/z$ ) calcd for  $\text{C}_{28}\text{H}_{28}\text{BrNO}_2$   $[\text{M}+\text{H}]^+$  446.1881 found 446.1867.

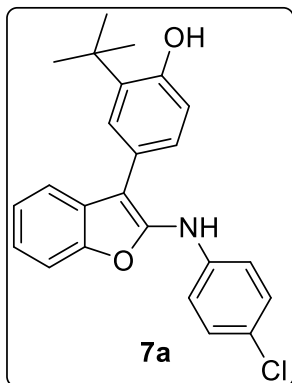

**(7a):** Reaction time: (30 min); liquid (Quantitative);  $R_f = 0.5$  (petroleum ether/ethyl acetate = 80/20);  $^1\text{H NMR}$  (500 MHz,  $\text{CDCl}_3$ )  $\delta$  7.61 (s, 1H), 7.44 (s, 2H), 7.29 – 7.24 (m, 3H), 7.20 (d,  $J = 8.0$  Hz, 2H), 6.90 (d,  $J = 7.9$  Hz, 2H), 6.75 (d,  $J = 8.1$  Hz, 1H), 6.04 (s, 1H), 4.96 (s, 1H), 1.38 (s, 9H);  $^{13}\text{C NMR}$  (126 MHz,  $\text{CDCl}_3$ )  $\delta$  153.46, 151.09, 147.20, 141.38, 136.96, 129.36, 128.93, 127.44, 126.70, 125.85, 124.04, 123.29, 123.22, 119.10, 117.28, 117.08, 110.94, 105.71, 34.80, 29.64; HRMS **7a** (ESI+) ( $m/z$ ) calcd for  $\text{C}_{24}\text{H}_{22}\text{ClNO}_2$   $[\text{M}]^+$  391.1334

found 391.1330.

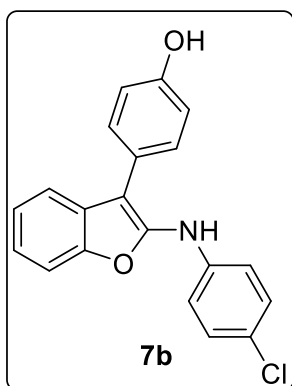

**(7b):** Reaction time: (6 h); Green liquid (44.4 mg, 84%);  $R_f = 0.5$  (petroleum ether/ethyl acetate = 80/20);  $^1\text{H NMR}$  (500 MHz,  $\text{CDCl}_3$ )  $\delta$  7.64 – 7.58 (m, 1H), 7.47 – 7.41 (m, 3H), 7.28 (s, 2H), 7.22 (d,  $J = 8.6$  Hz, 2H), 6.93 (dd,  $J = 8.6, 2.9$  Hz, 4H), 6.04 (s, 1H), 5.18 (s, 1H);  $^{13}\text{C NMR}$  (126 MHz,  $\text{CDCl}_3$ )  $\delta$  151.01, 147.33, 141.26, 129.99, 129.69, 129.56, 129.40, 128.93, 128.83, 125.95, 124.32, 123.33, 123.24, 118.97, 117.36, 117.15, 116.20, 115.48, 110.93, 105.16; HRMS of oxidized product of **7b** (ESI+) ( $m/z$ ) calcd for  $\text{C}_{20}\text{H}_{14}\text{ClNO}_2$   $[\text{M}+\text{H}]^+$

334.0629 found 334.0634 [Note: the product spectra contain visible amount of solvent peaks. We could not remove it even after repeated attempts].

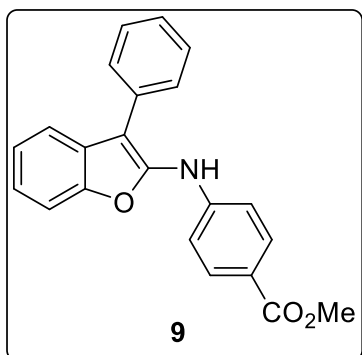

**(9):** Reaction time: (30 min); liquid (50.1 mg, 73%);  $R_f = 0.5$  (petroleum ether/ethyl acetate = 80/20);  $^1\text{H NMR}$  (400 MHz,  $\text{CDCl}_3$ )  $\delta$  7.95 (d,  $J = 8.8$  Hz, 2H), 7.67 (dd,  $J = 5.4, 1.3$  Hz, 1H), 7.57 (dd,  $J = 8.1, 1.0$  Hz, 2H), 7.50 – 7.43 (m, 3H), 7.37 – 7.31 (m, 1H), 7.31 – 7.27 (m, 2H), 7.00 (d,  $J = 8.8$  Hz, 2H), 6.37 (s, 1H), 3.88 (s, 3H);  $^{13}\text{C NMR}$  (126 MHz,  $\text{CDCl}_3$ )  $\delta$  167.02, 151.19, 146.69, 131.81, 131.53, 129.27, 128.39, 128.29, 127.36, 123.75,

123.41, 122.39, 119.25, 114.86, 111.08, 106.60, 51.96; HRMS **9** (ESI+) ( $m/z$ ) calcd for  $\text{C}_{22}\text{H}_{17}\text{NO}_2$   $[\text{M}]^+$  343.1203 found 343.1199.

## 7. $^1\text{H}$ NMR, $^{13}\text{C}$ NMR, Mass Spectra of Compounds

$^1\text{H}$  NMR of compound **3aa** in  $\text{CDCl}_3$

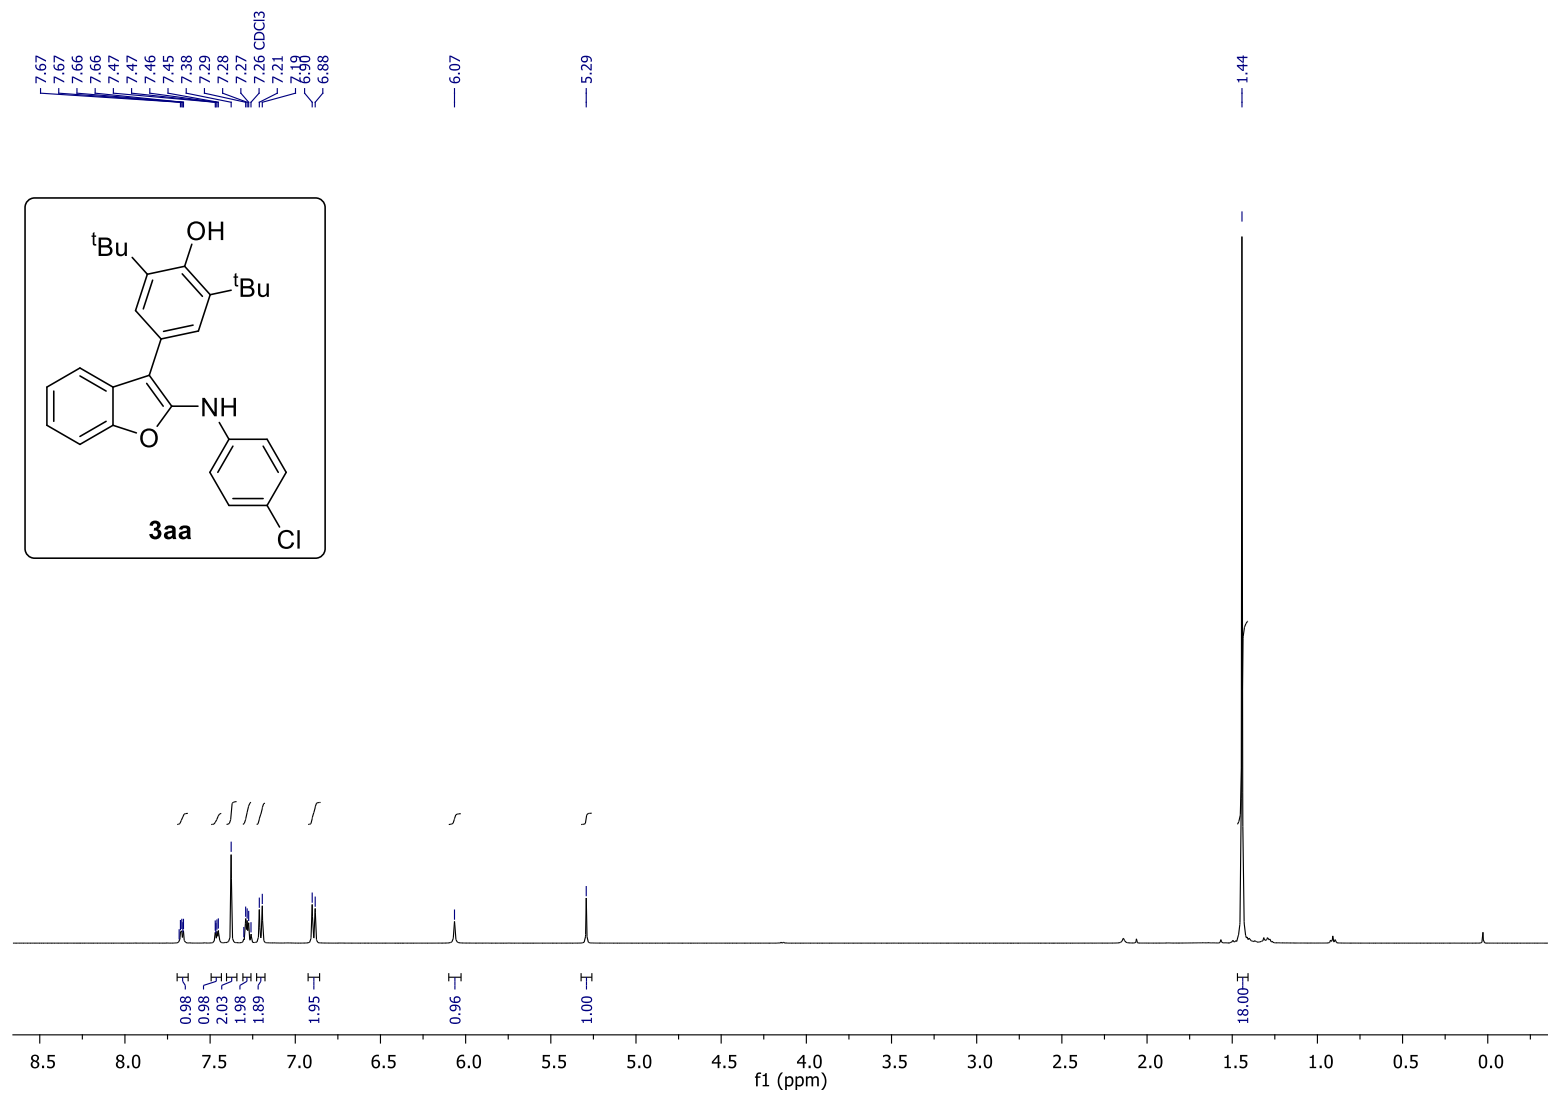

$^{13}\text{C}$  NMR of compound **3aa** in  $\text{CDCl}_3$

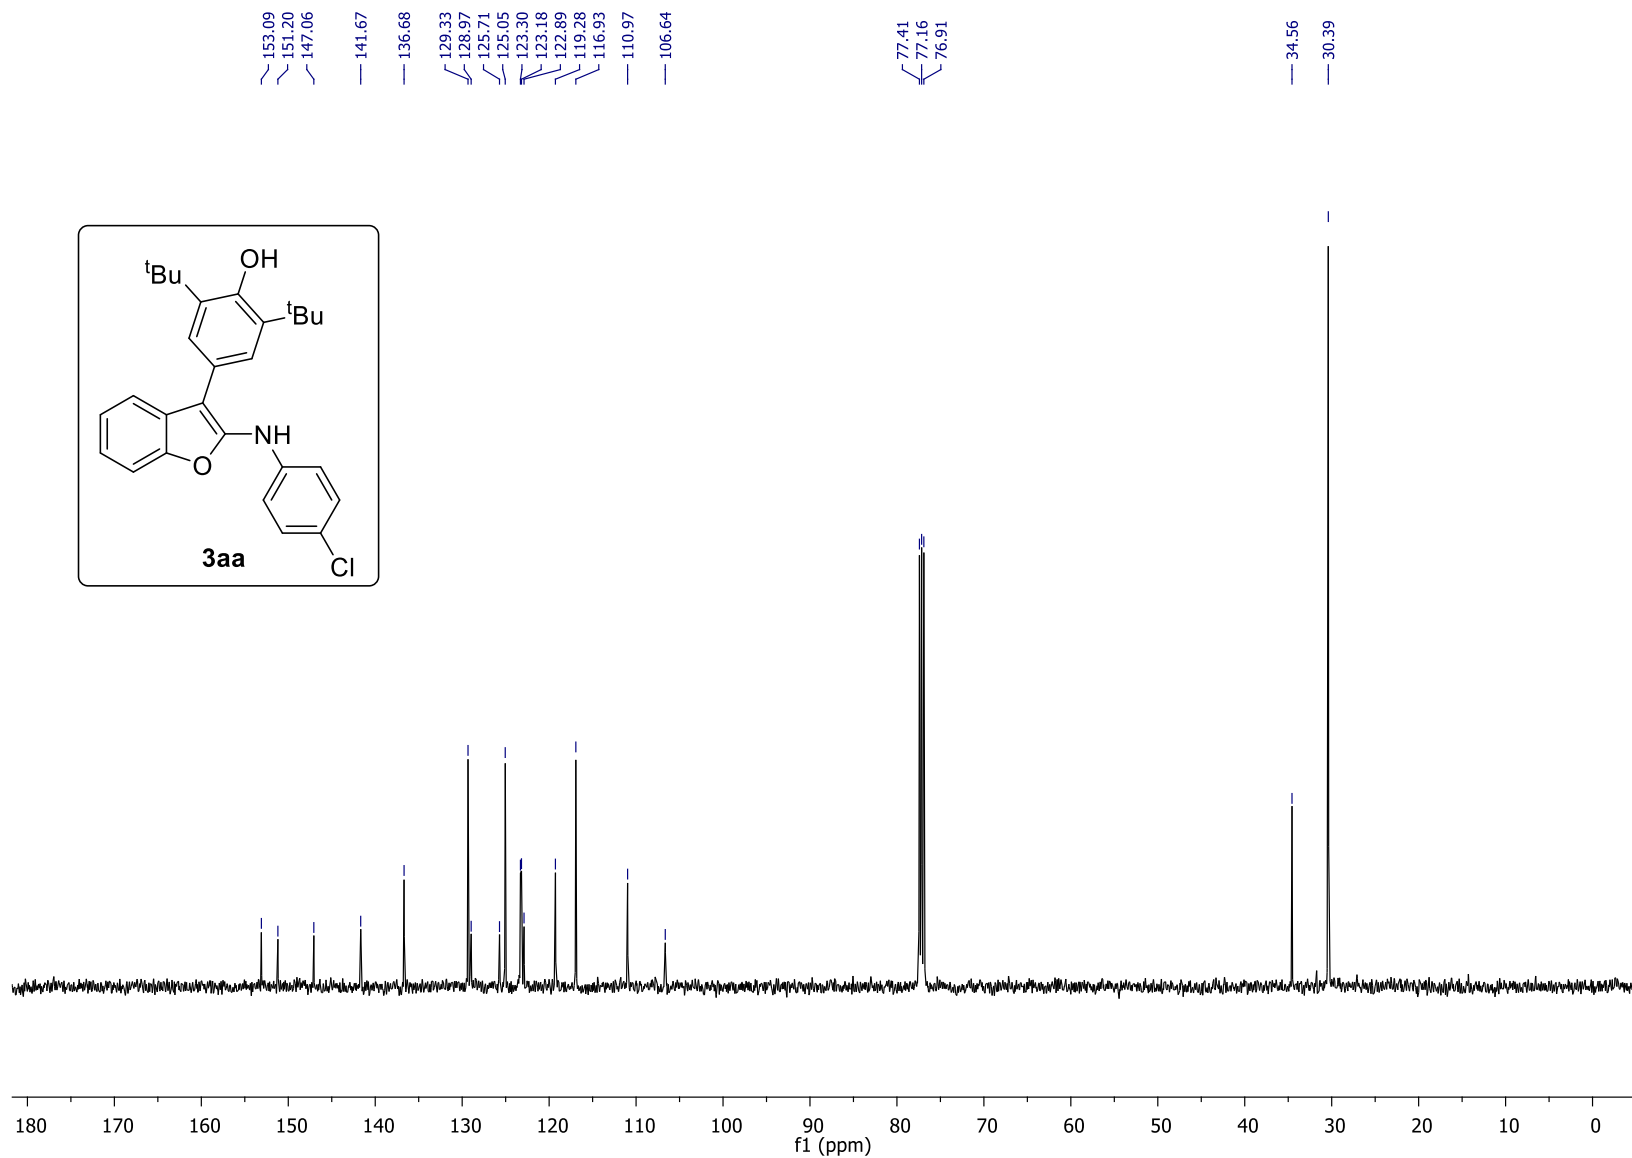

$^1\text{H}$  NMR of compound **3ab** in  $\text{CDCl}_3$

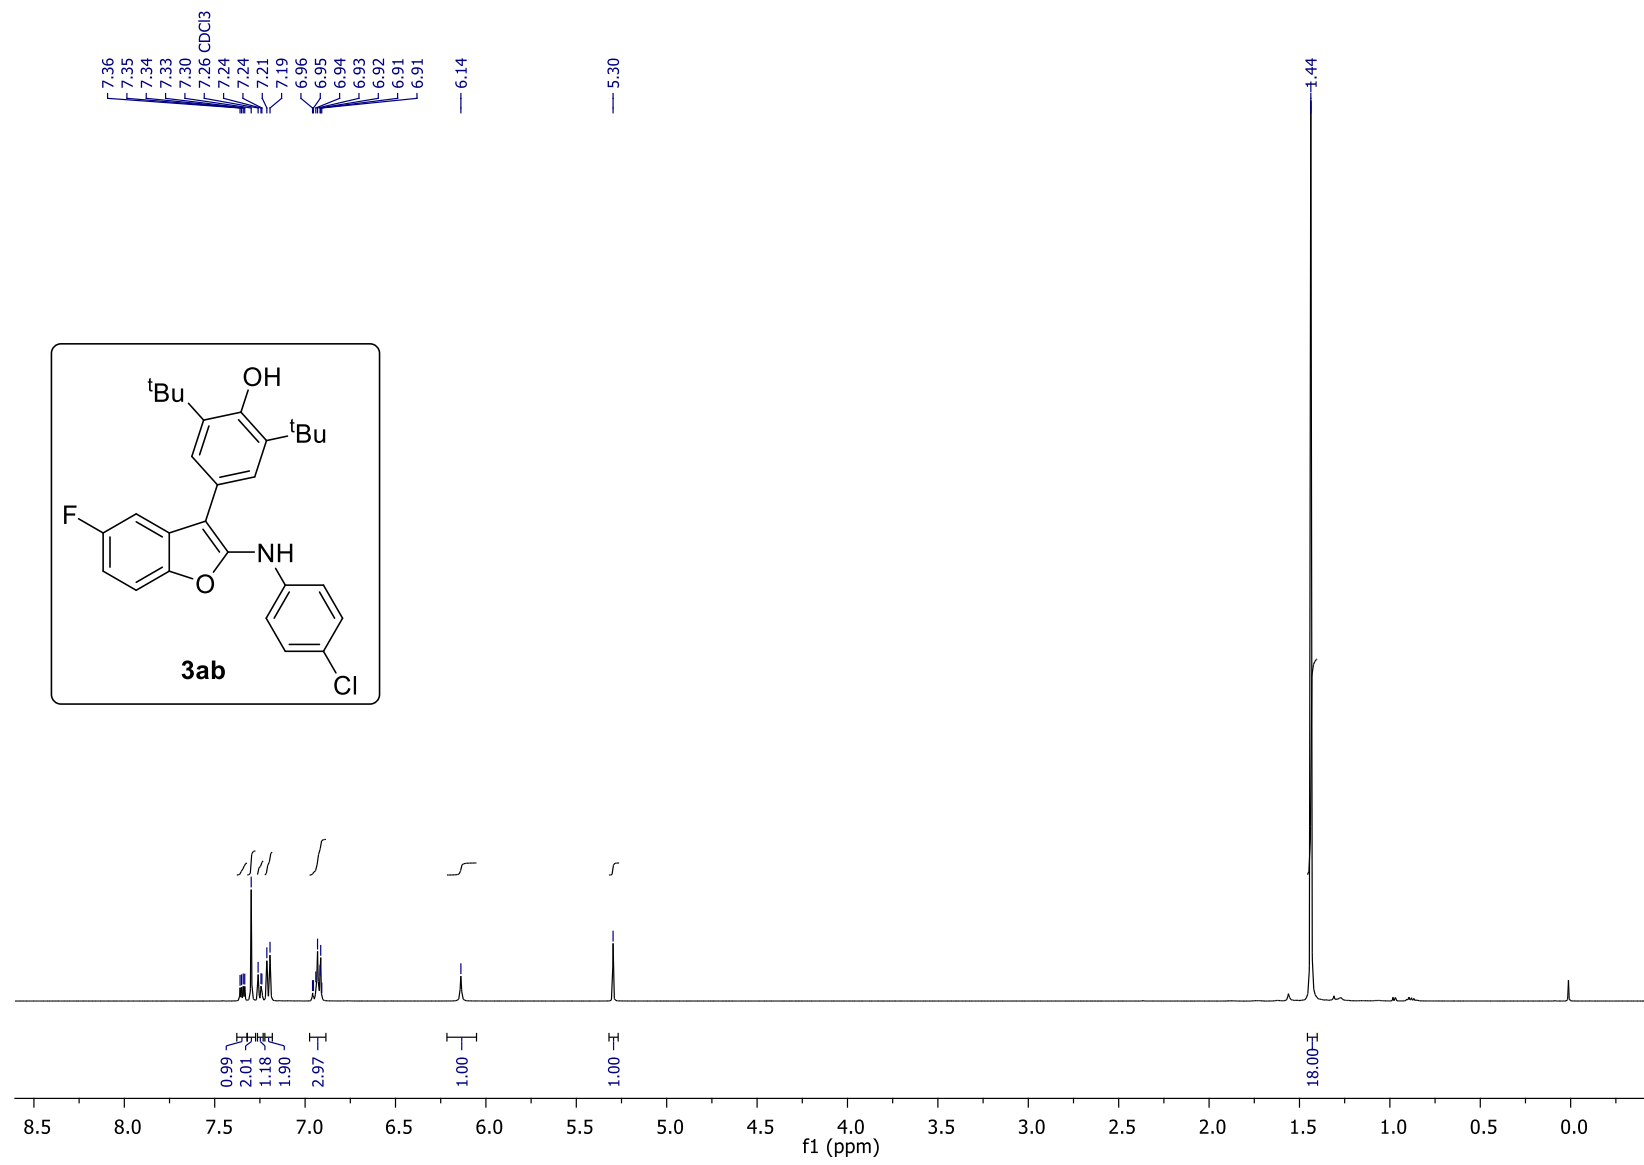

$^{13}\text{C}$  NMR of compound **3ab** in  $\text{CDCl}_3$

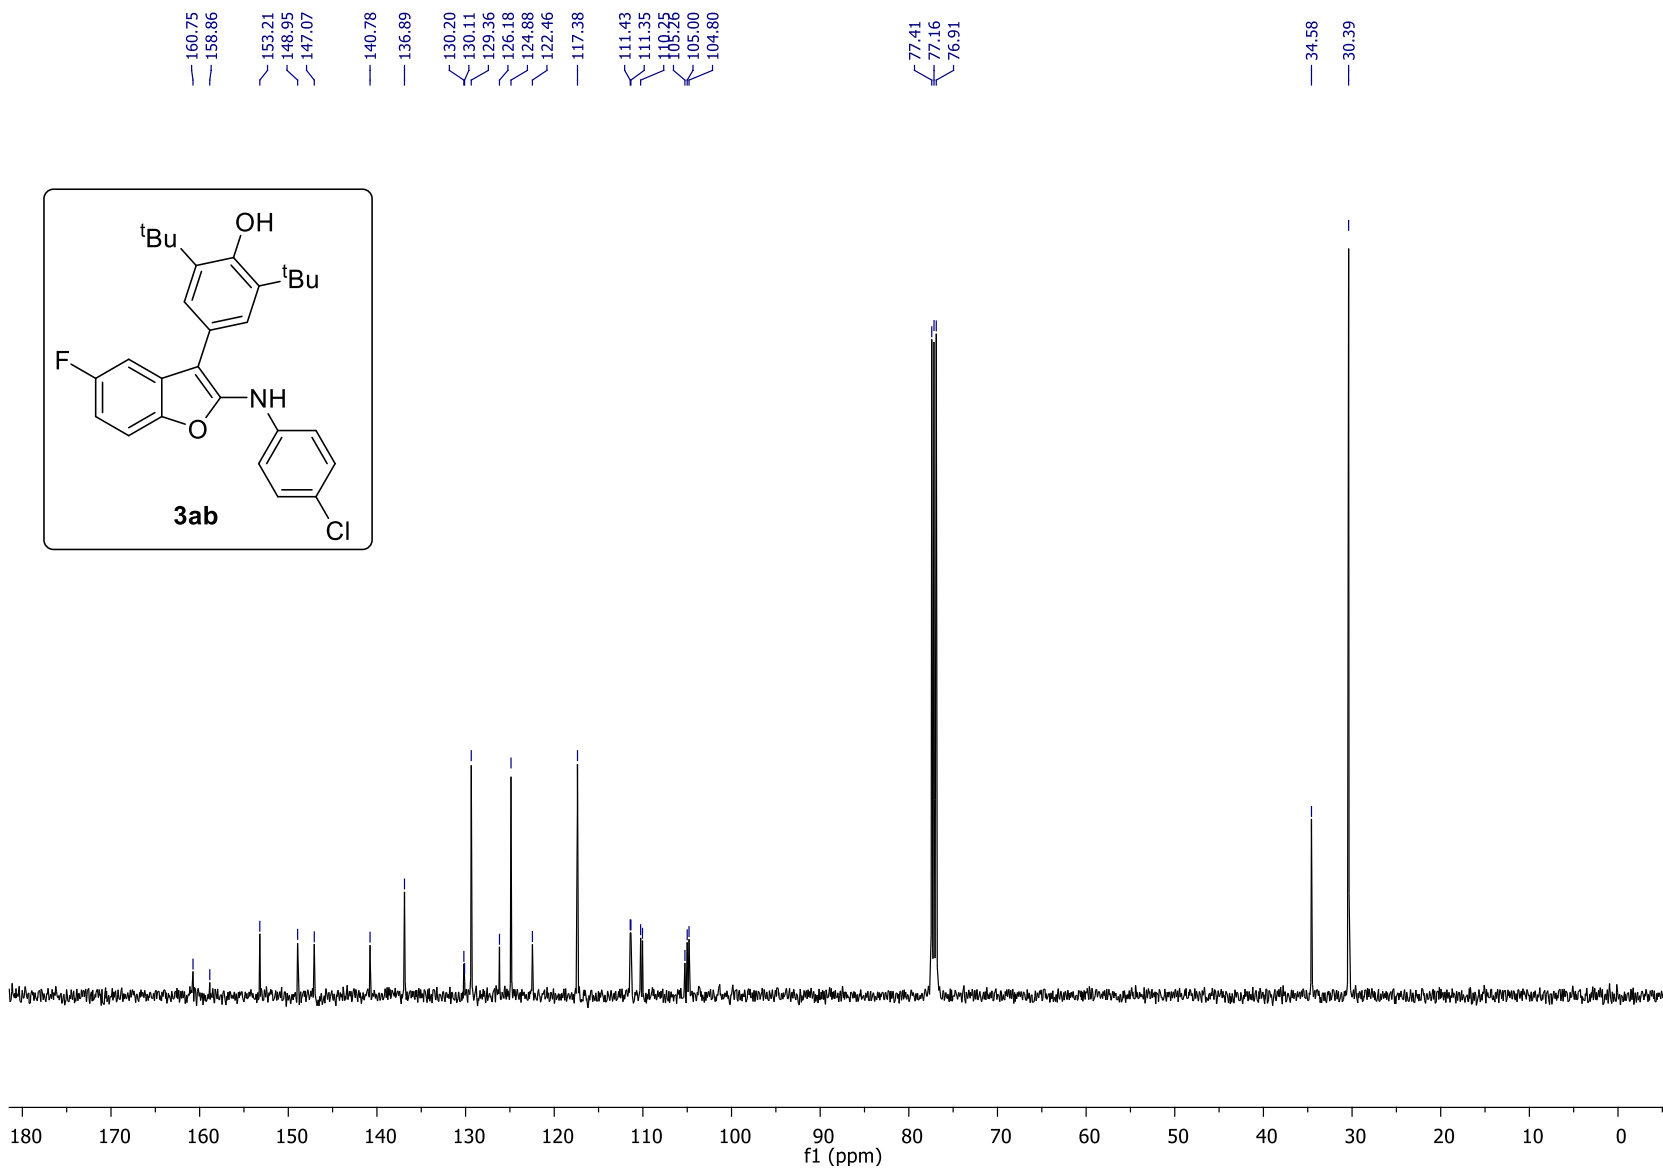

$^{19}\text{F}$  NMR of compound **3ab** in  $\text{CDCl}_3$

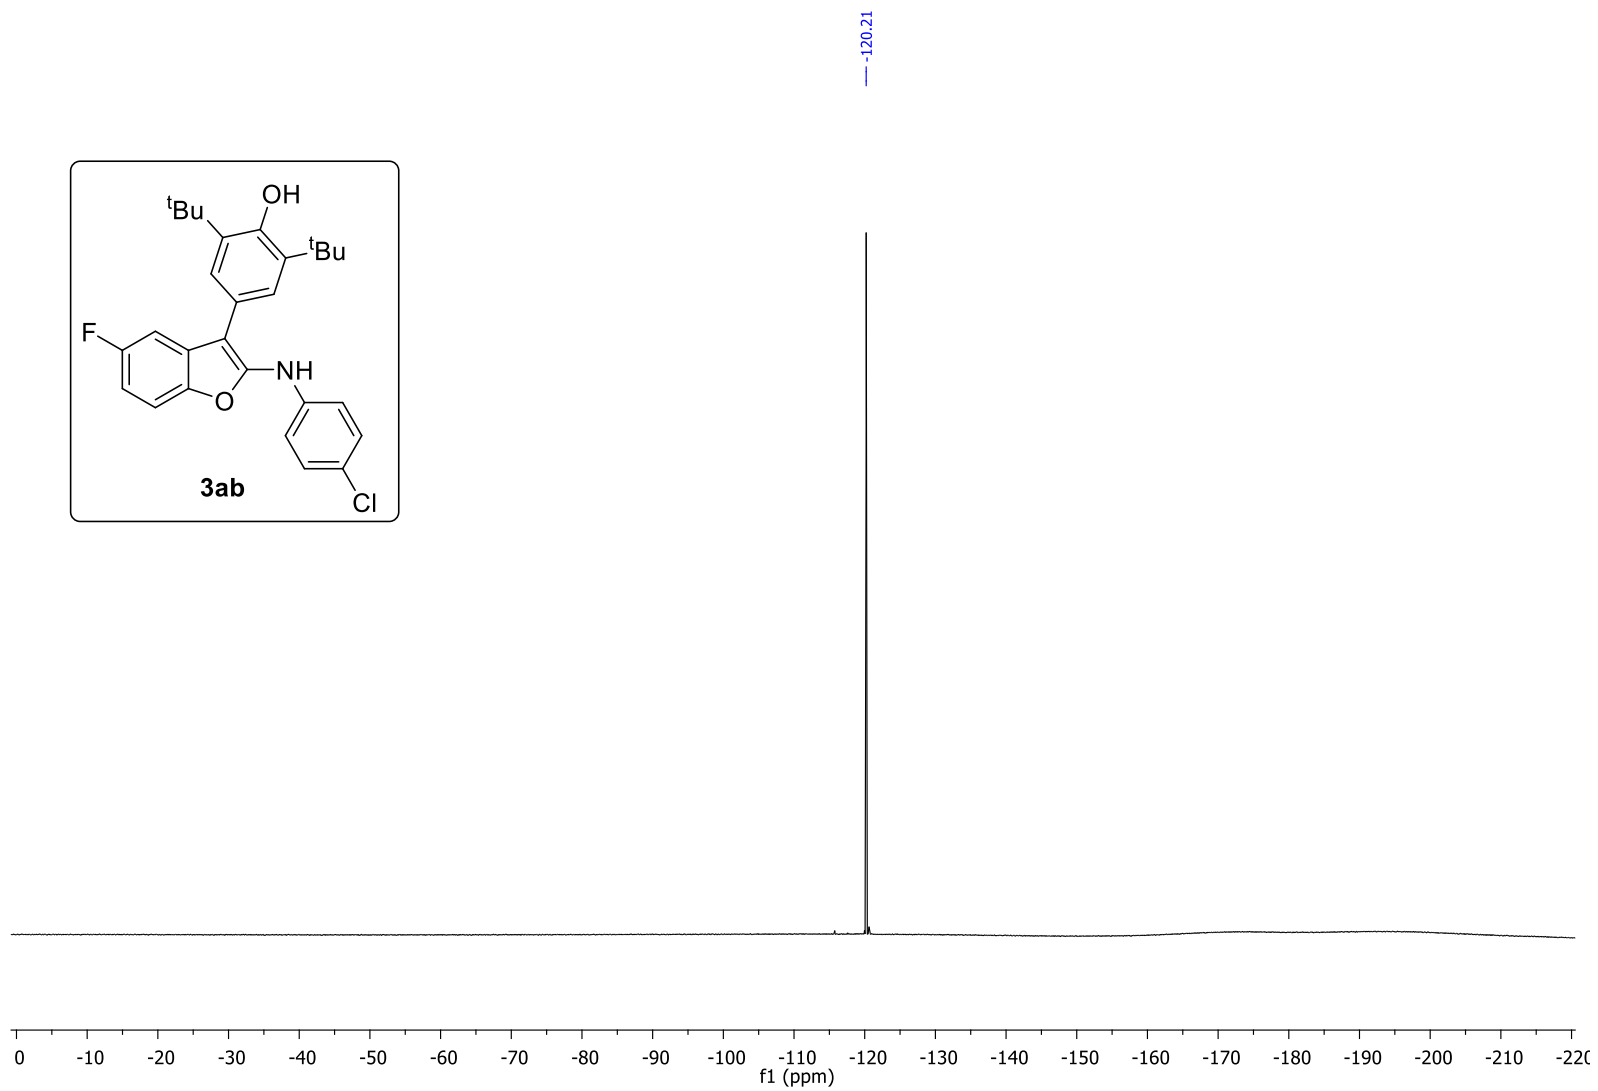



$^1\text{H}$  NMR of compound **3ac** in  $\text{CDCl}_3$

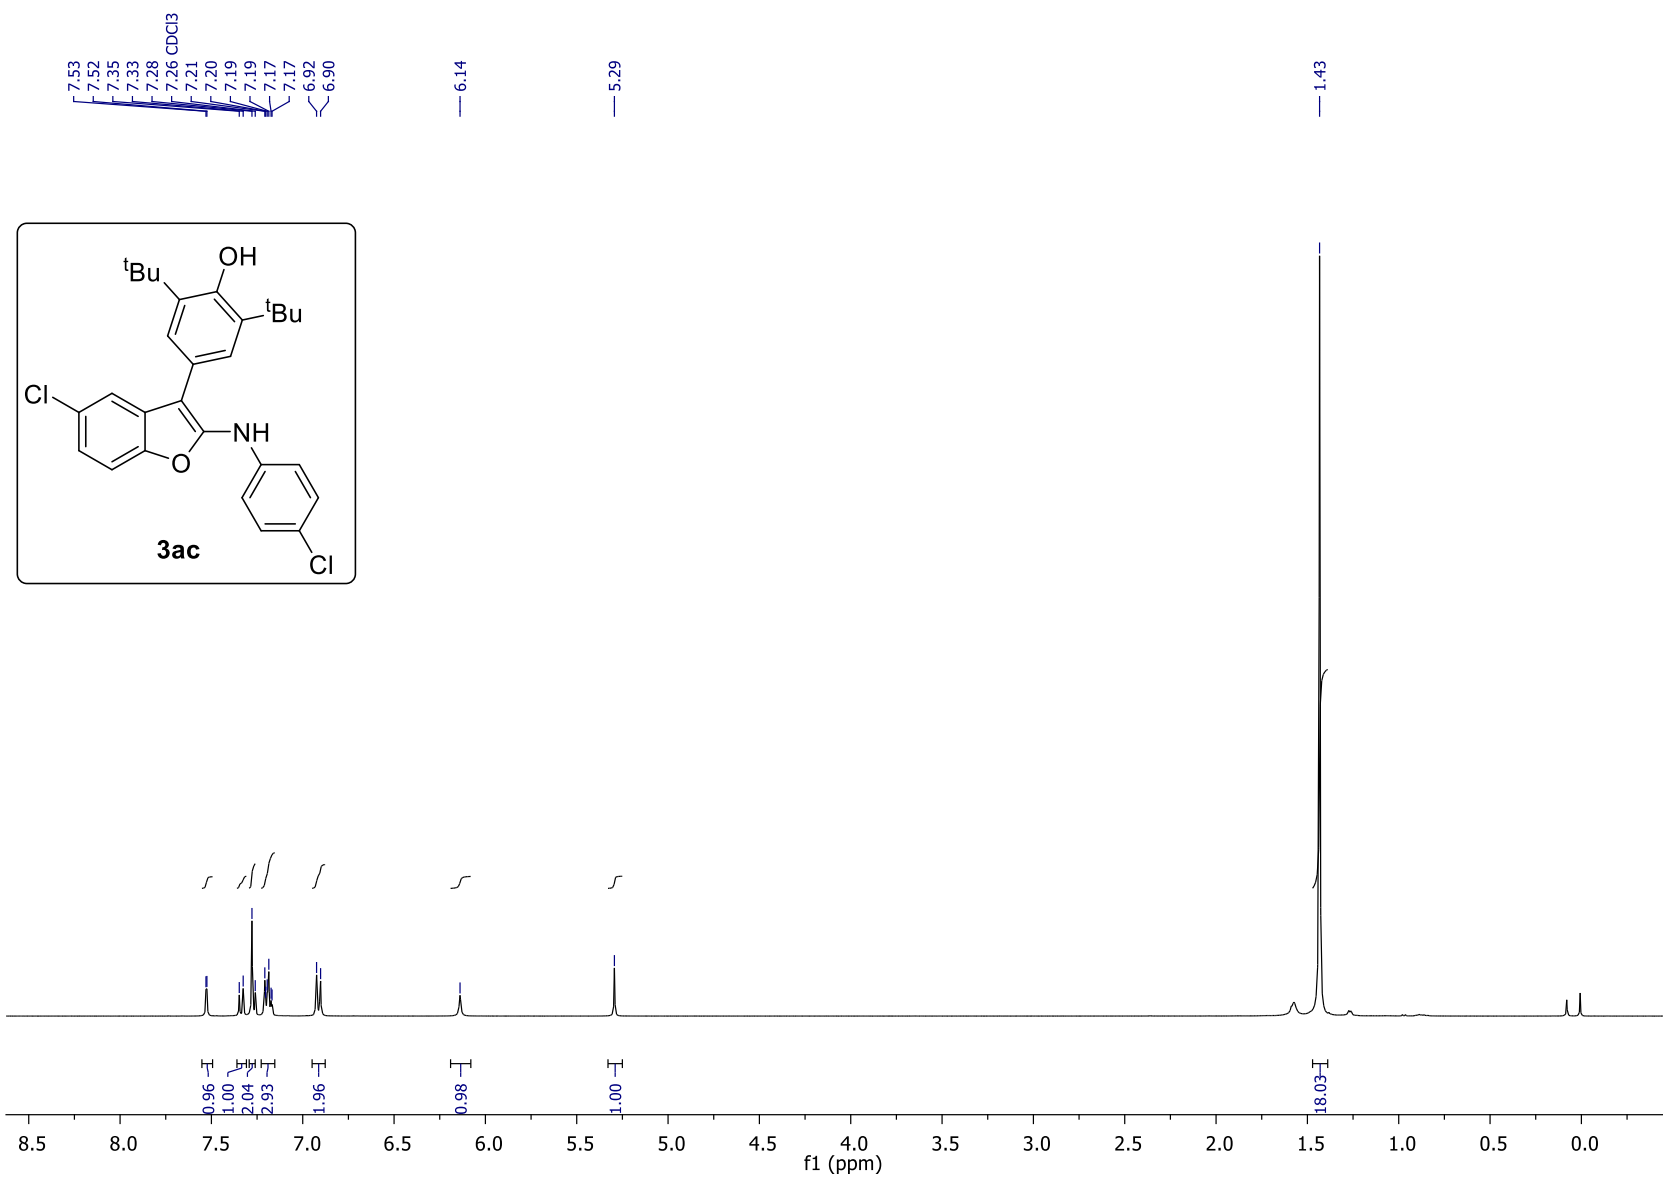

$^{13}\text{C}$  NMR of compound **3ac** in  $\text{CDCl}_3$

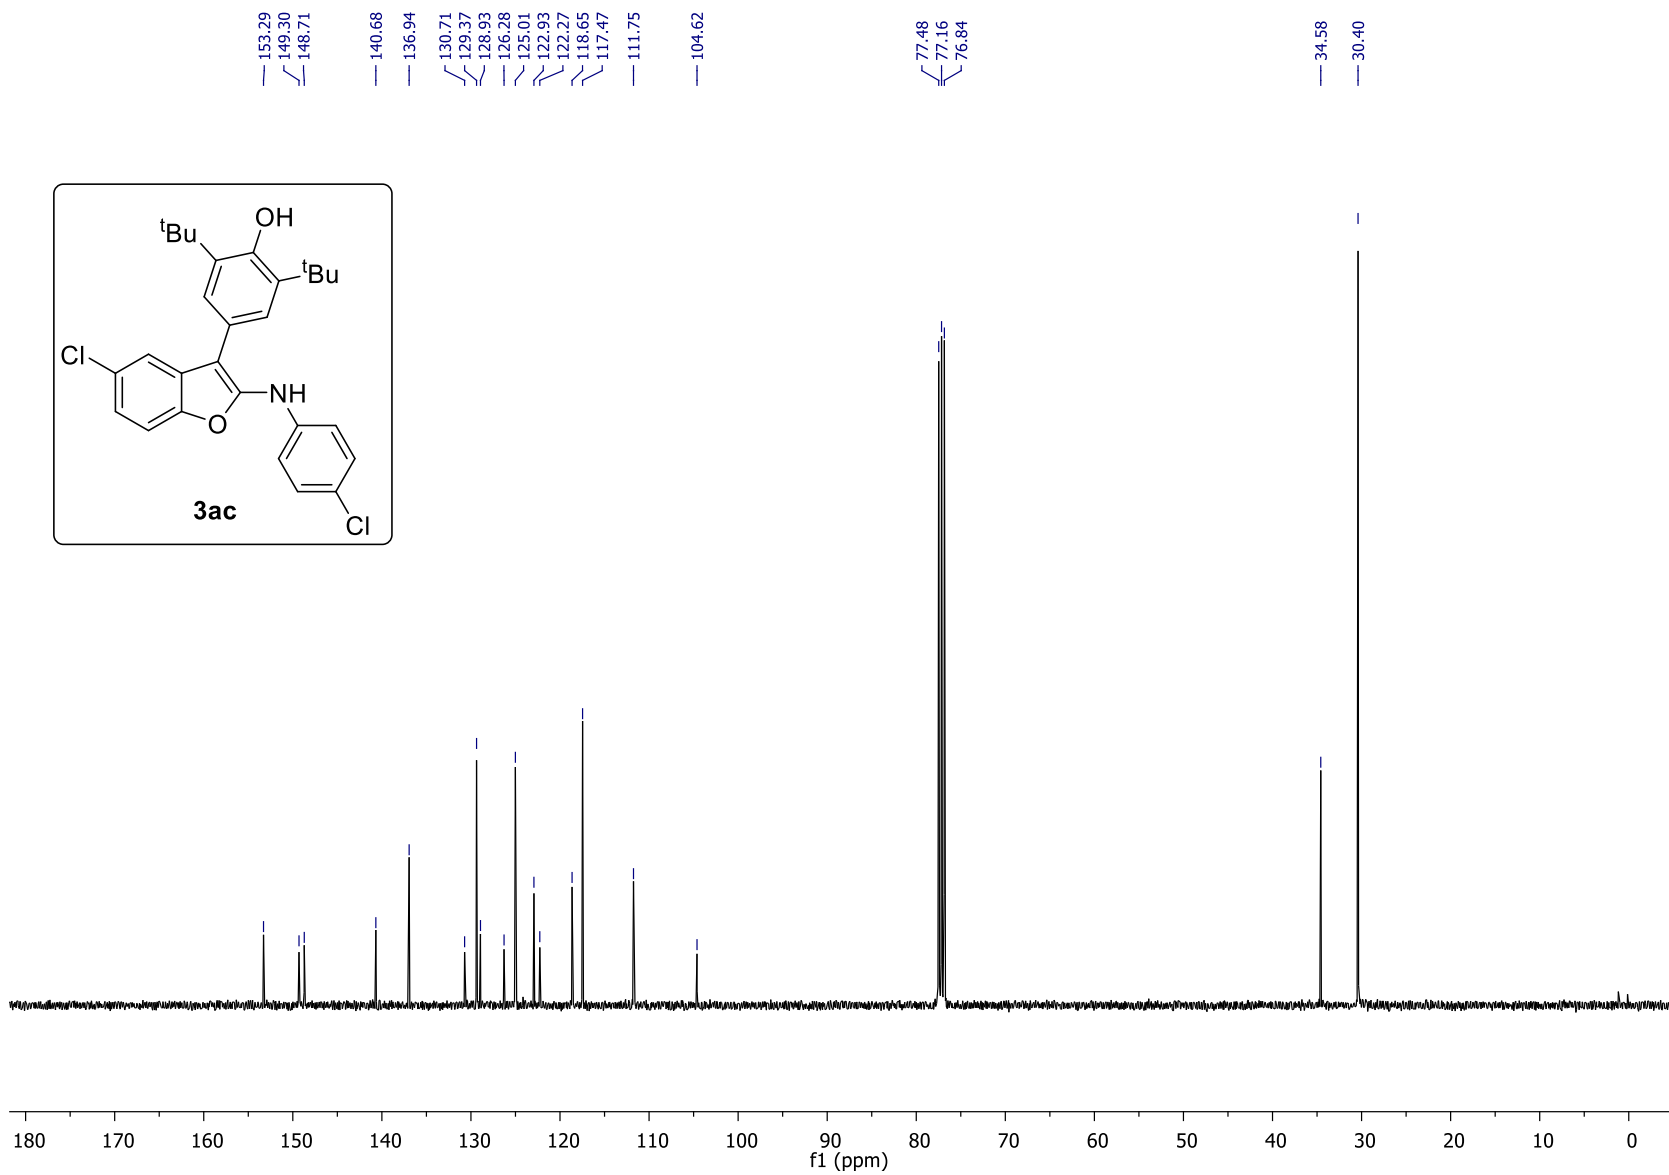

$^1\text{H}$  NMR of compound **3ad** in  $\text{CDCl}_3$

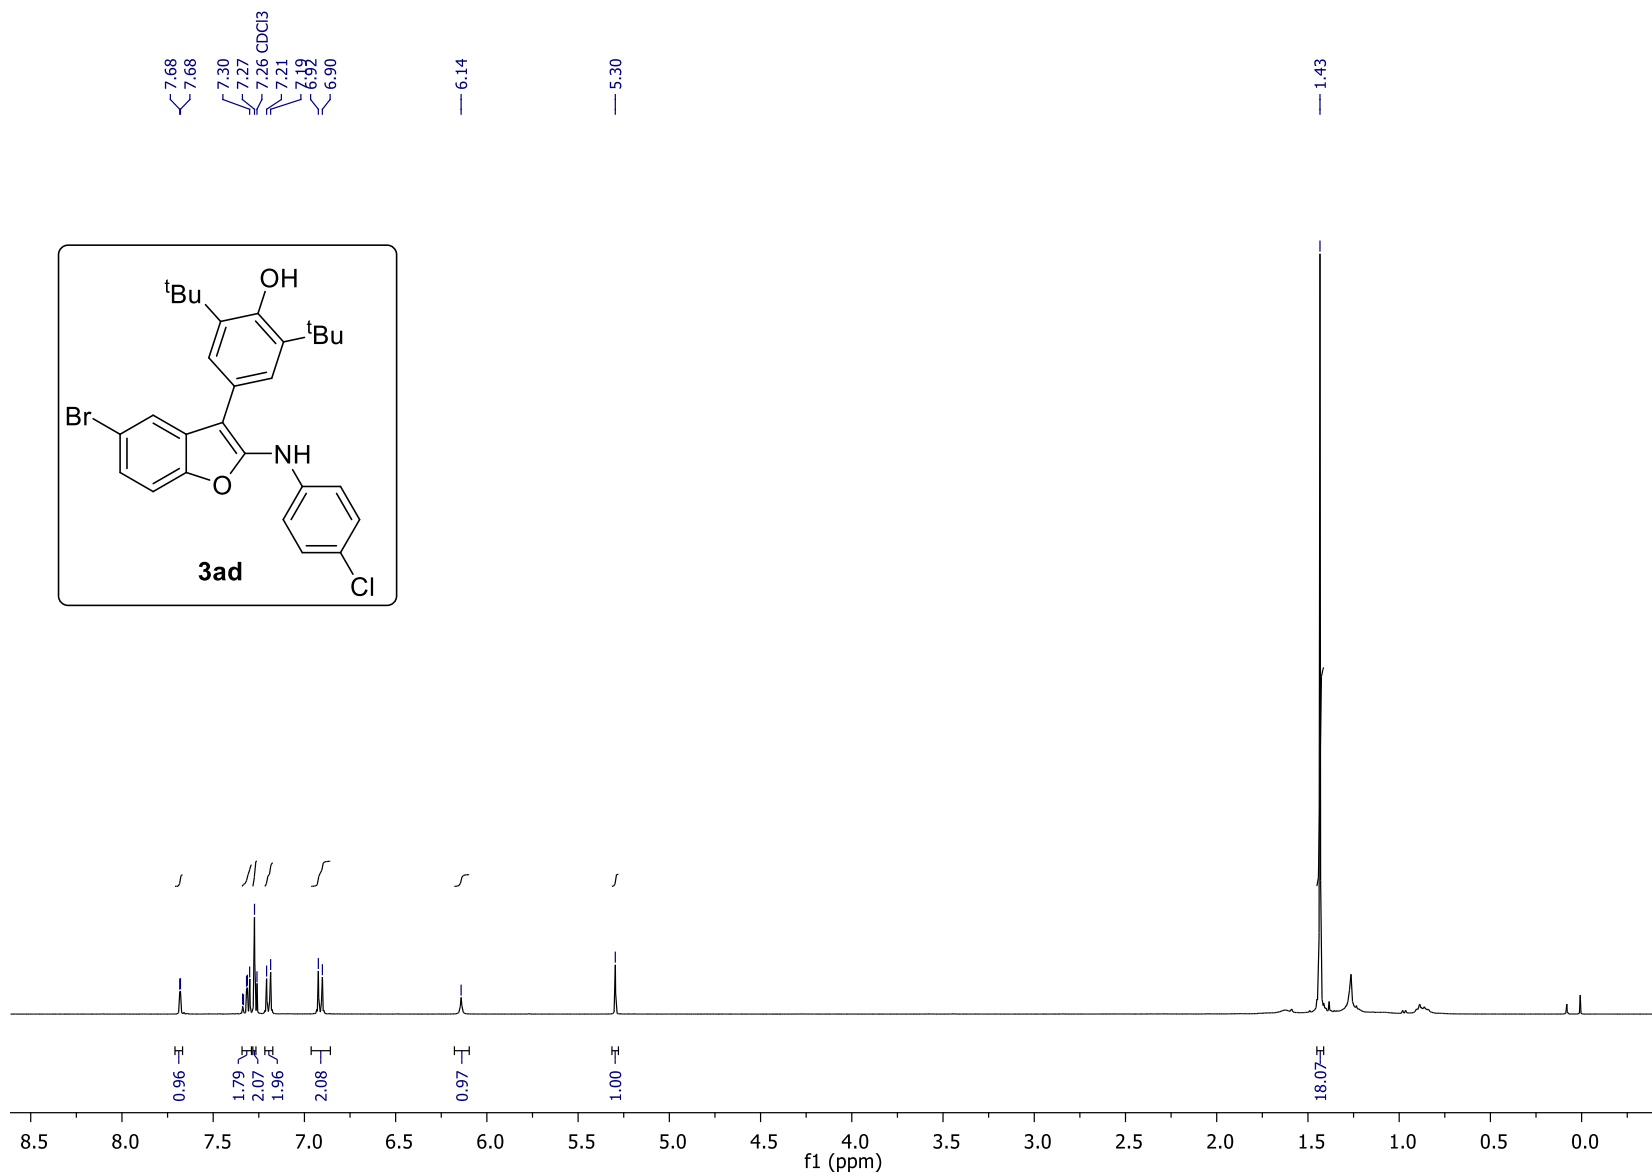

$^{13}\text{C}$  NMR of compound **3ad** in  $\text{CDCl}_3$

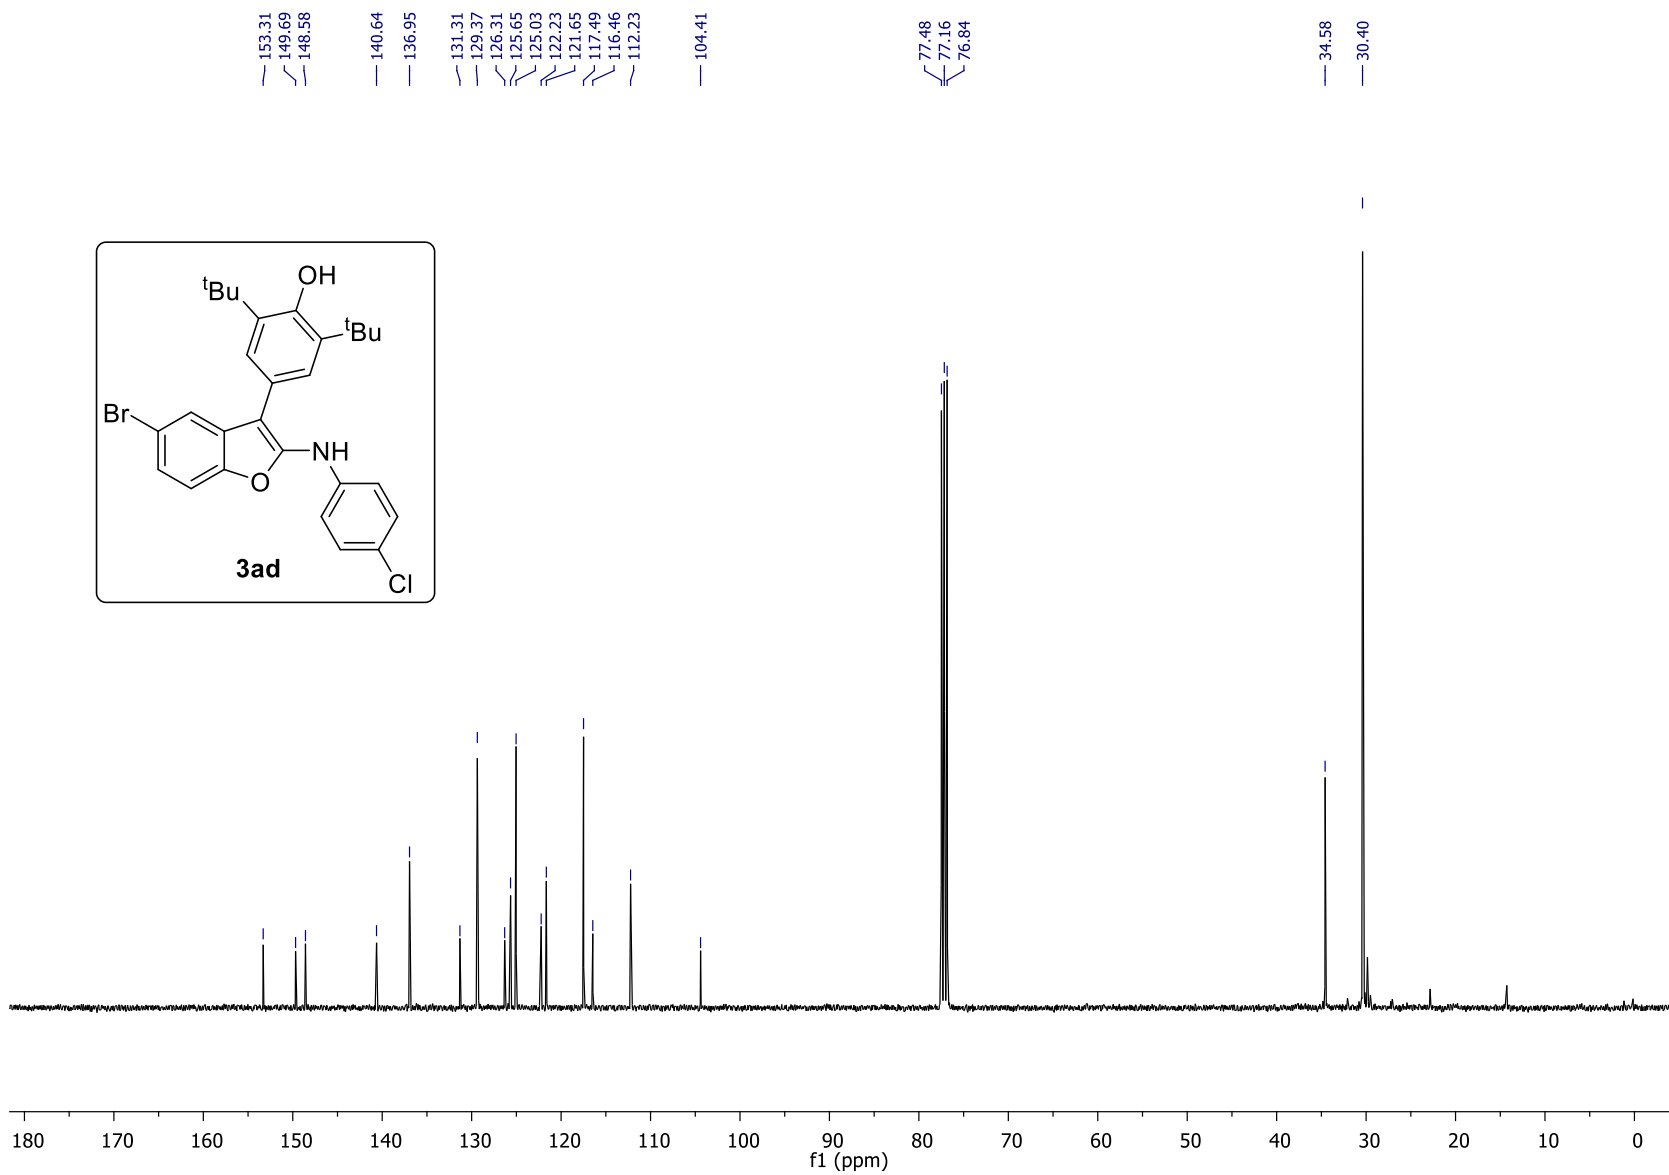

$^1\text{H}$  NMR of compound **3ae** in  $\text{CDCl}_3$

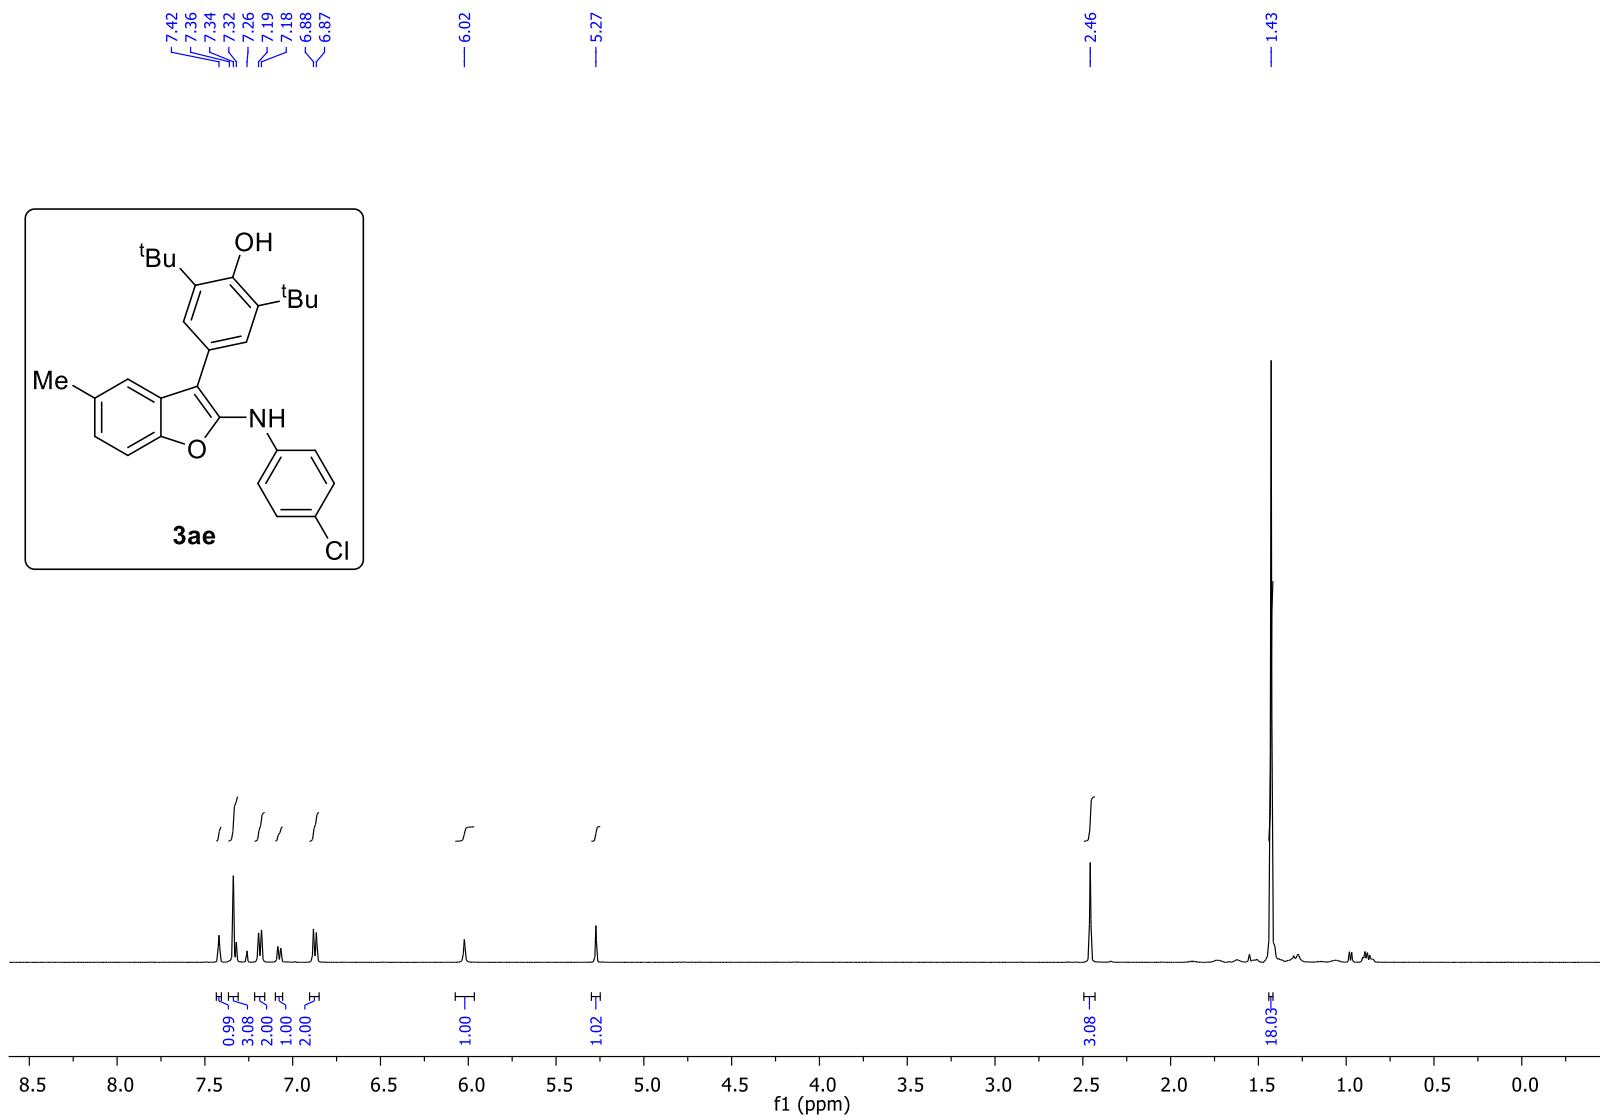

$^{13}\text{C}$  NMR of compound **3ae** in  $\text{CDCl}_3$

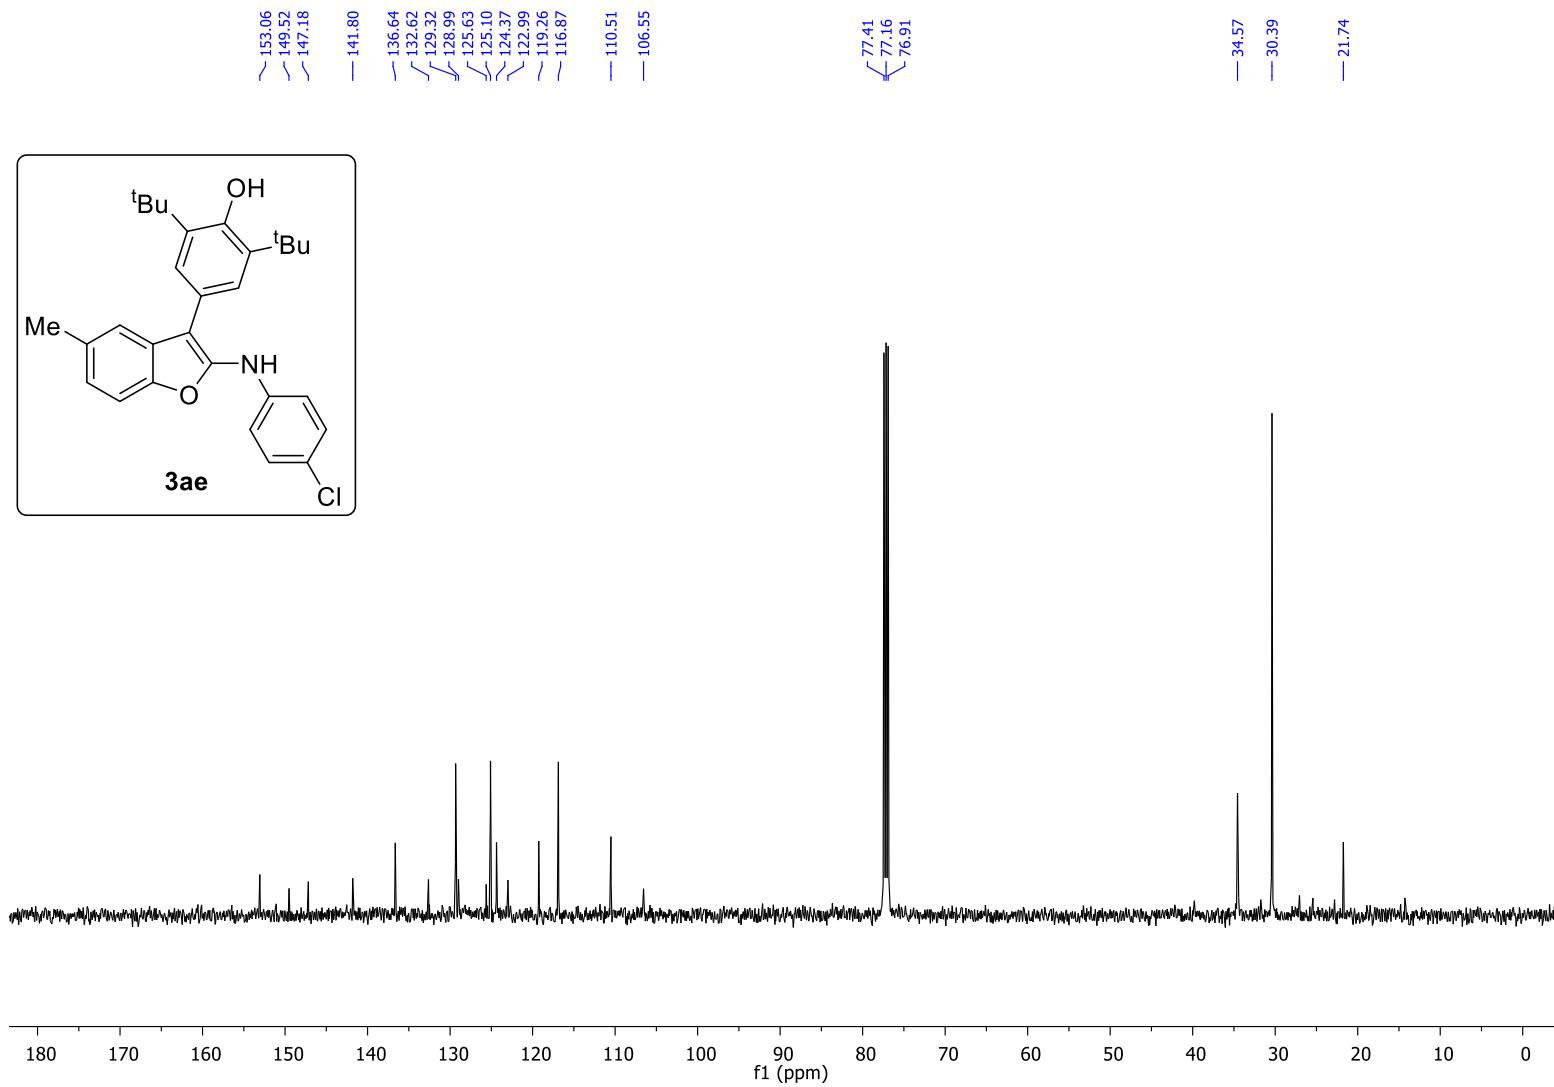

$^1\text{H}$  NMR of compound **3af** in  $\text{CDCl}_3$

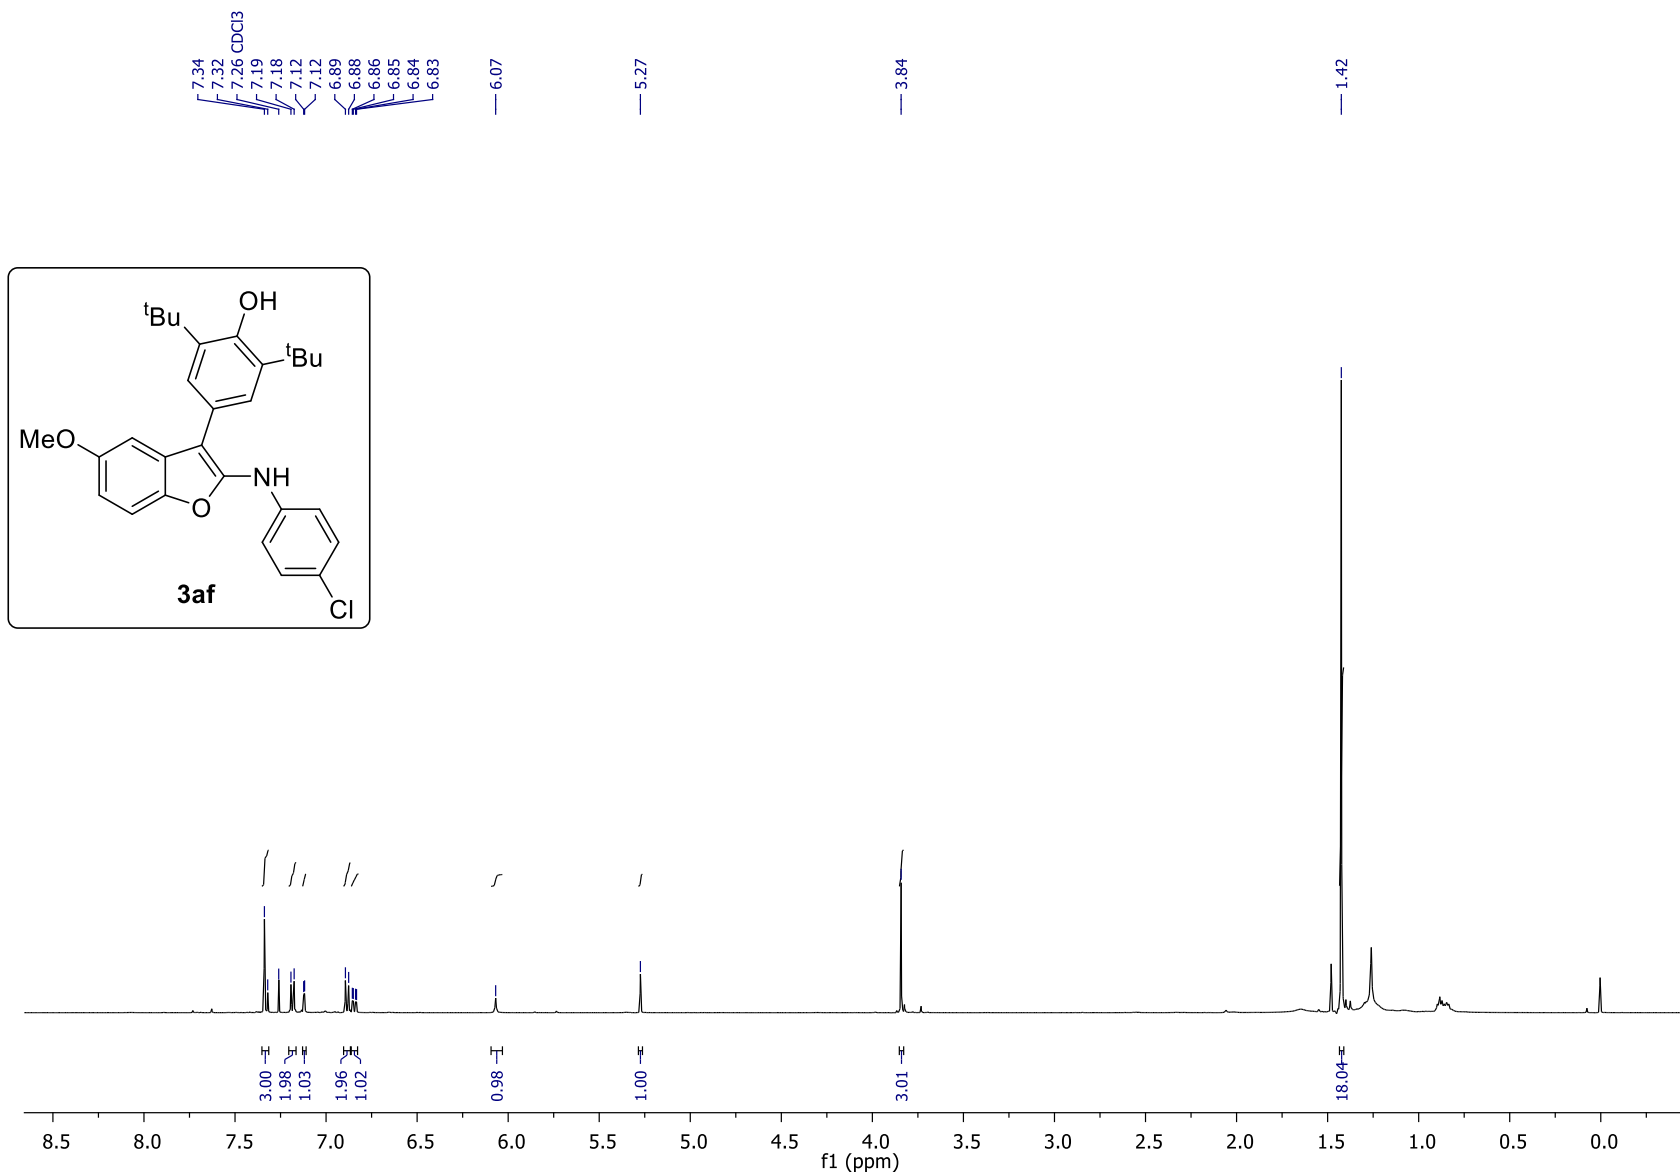

$^{13}\text{C}$  NMR of compound **3af** in  $\text{CDCl}_3$

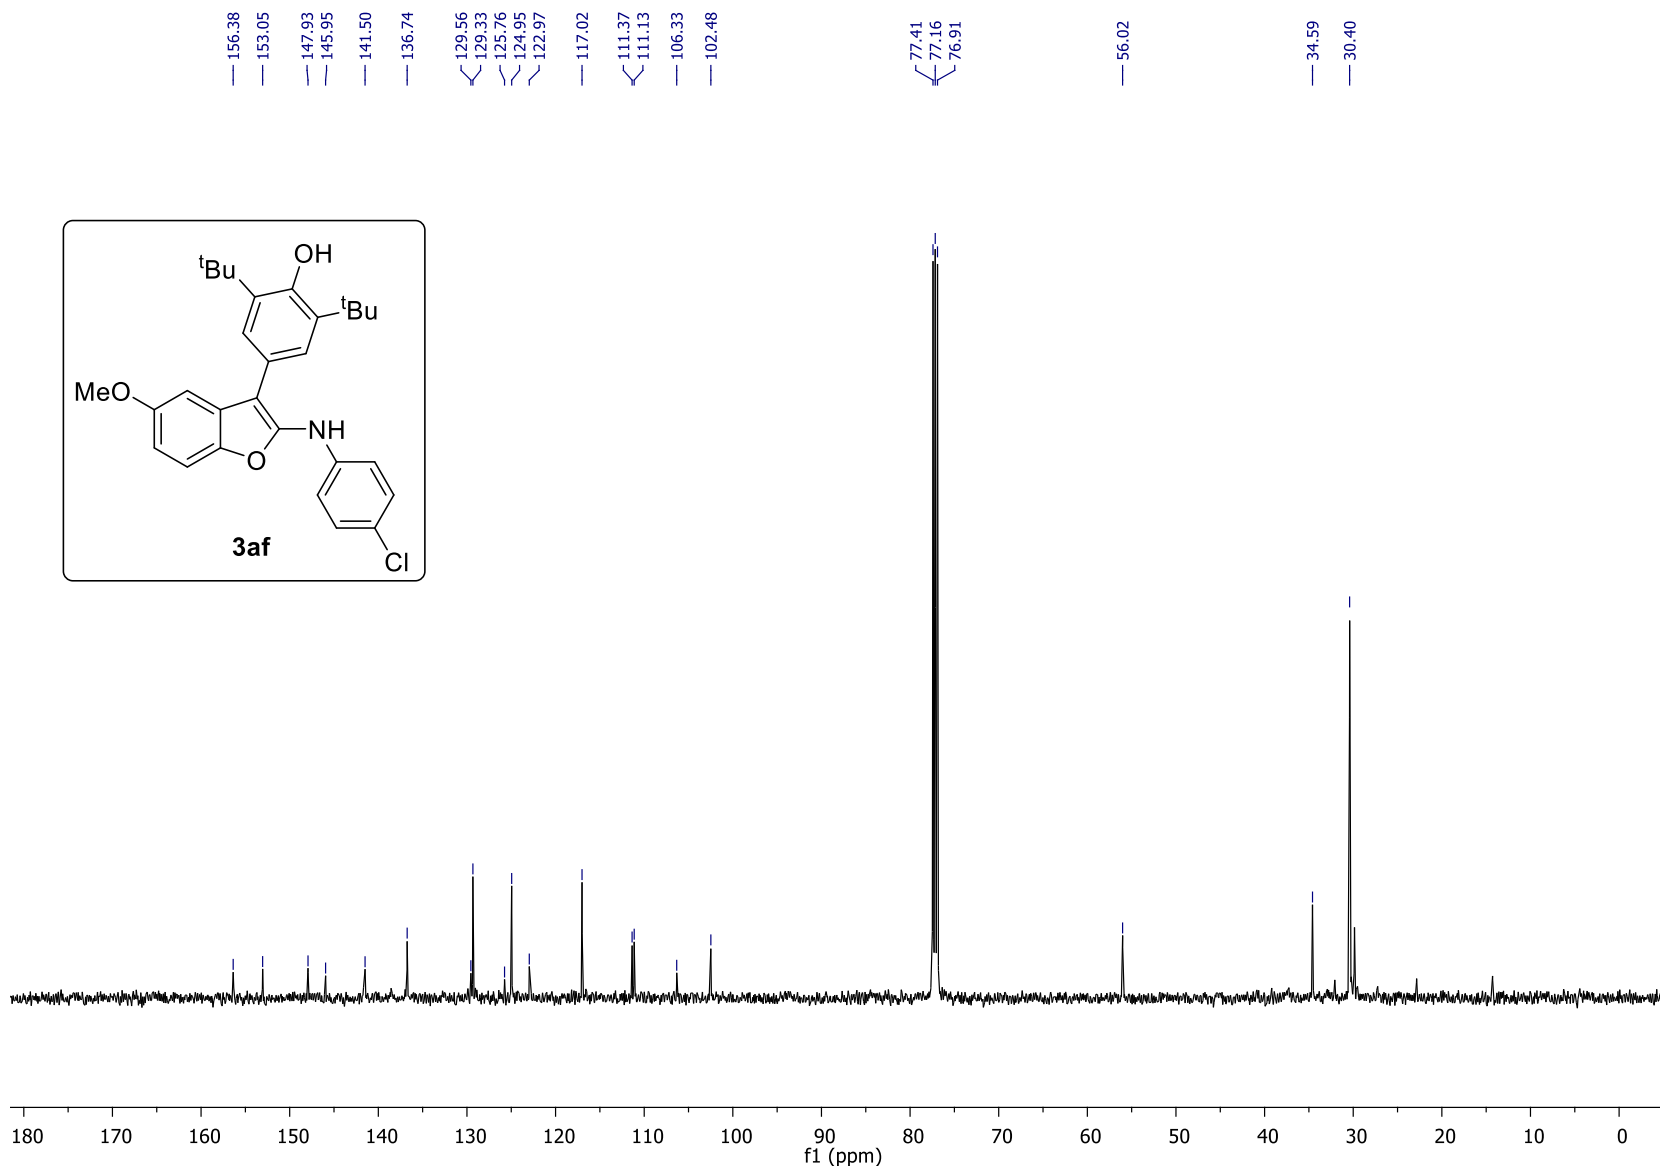



$^1\text{H}$  NMR of compound **3ag** in  $\text{CDCl}_3$

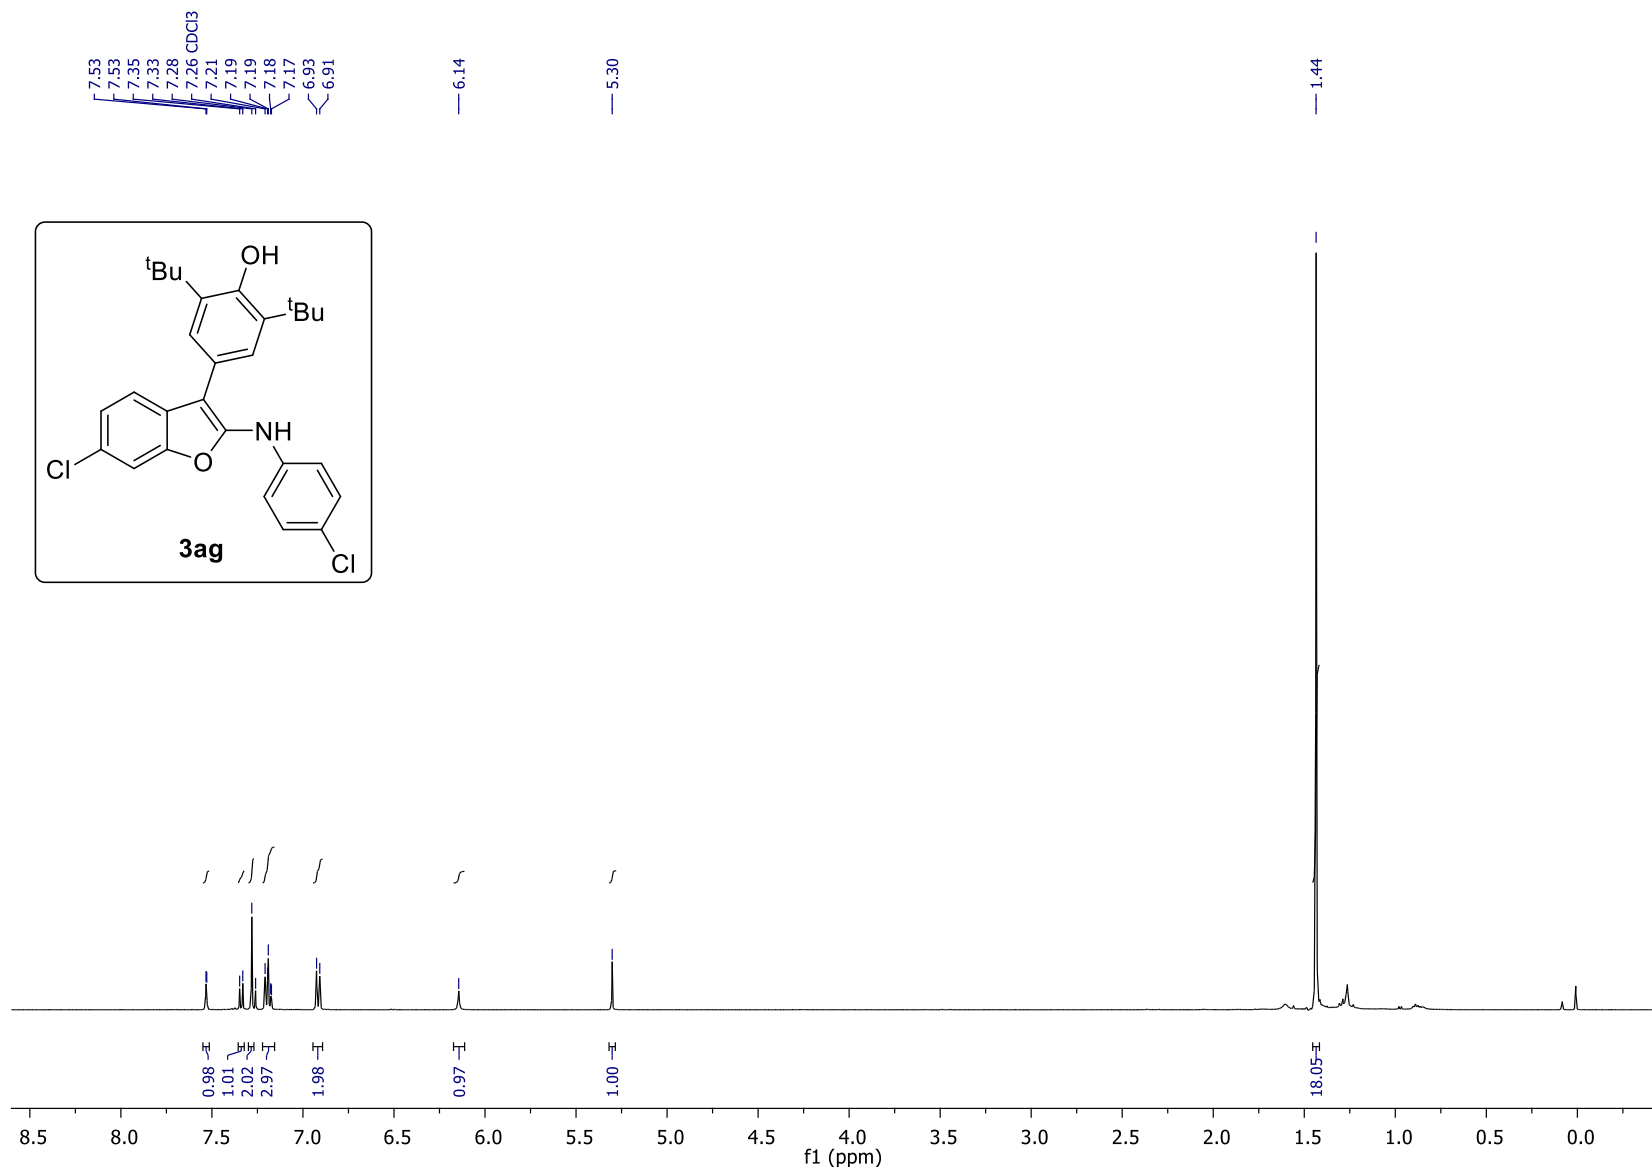

$^{13}\text{C}$  NMR of compound **3ag** in  $\text{CDCl}_3$

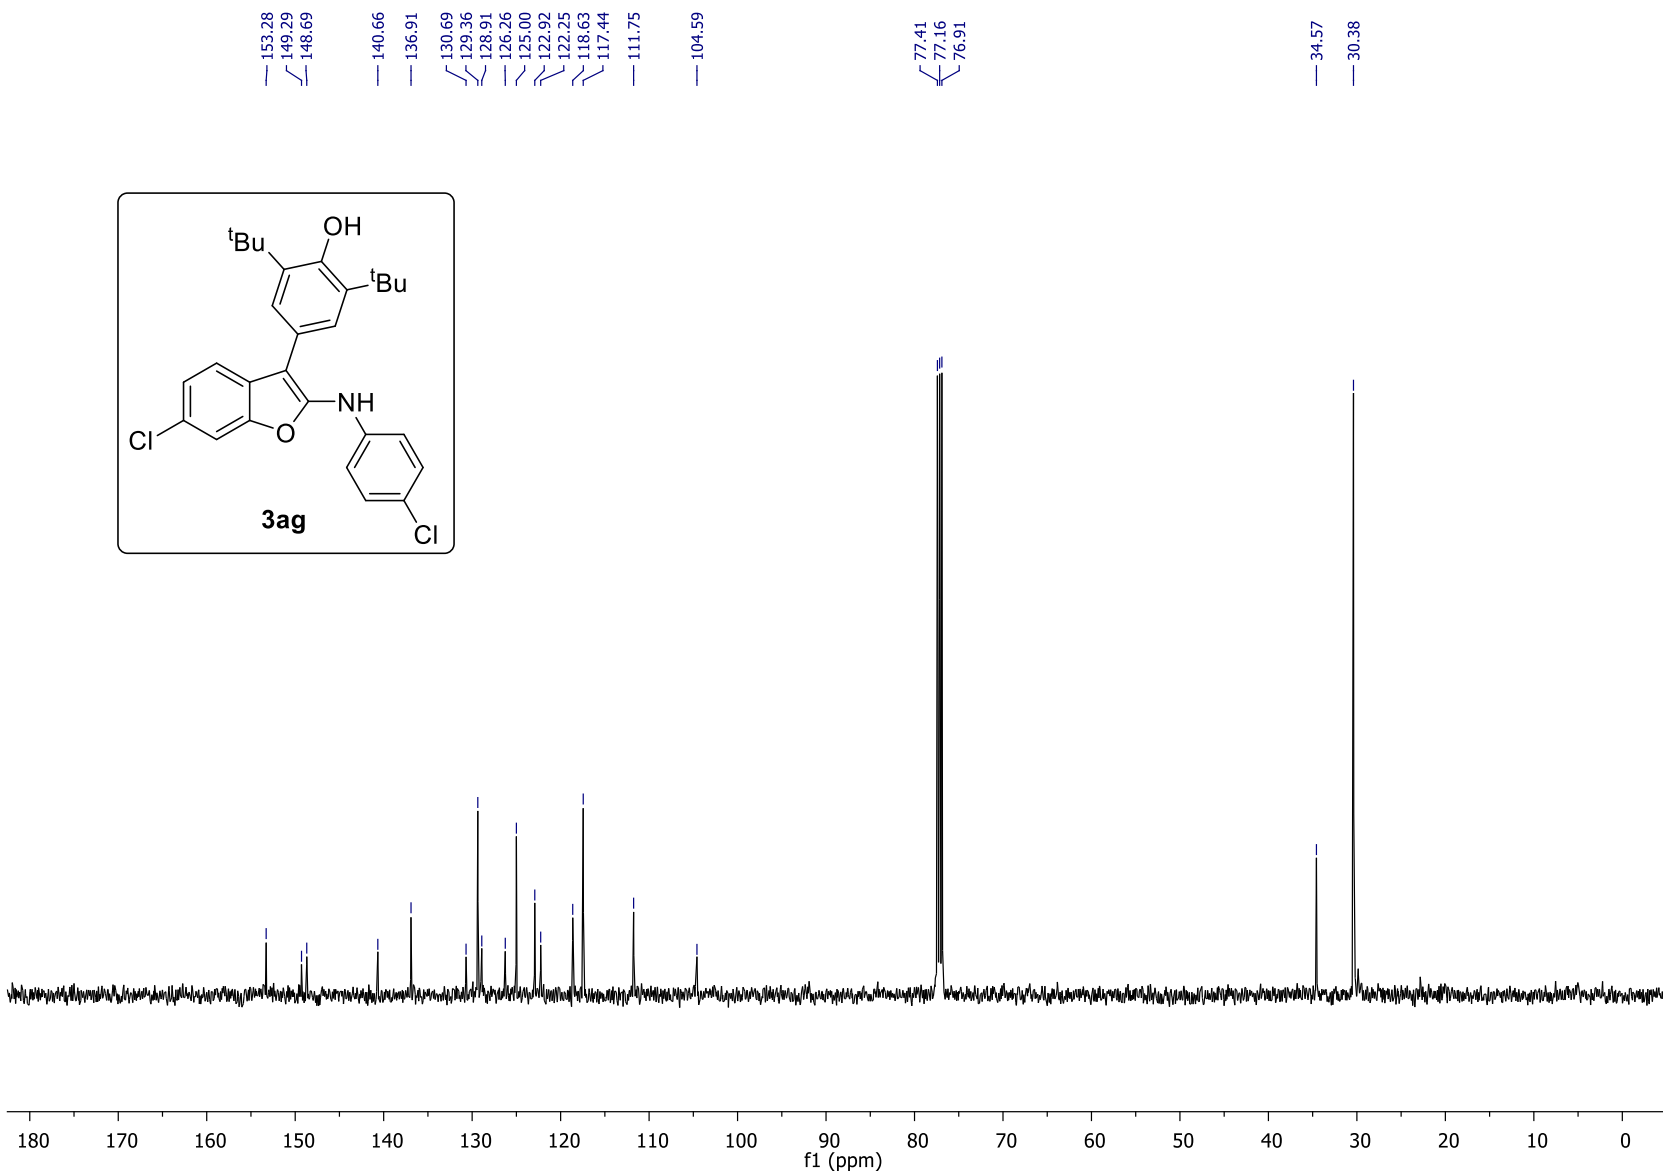

$^1\text{H}$  NMR of compound **3ah** in  $\text{CDCl}_3$

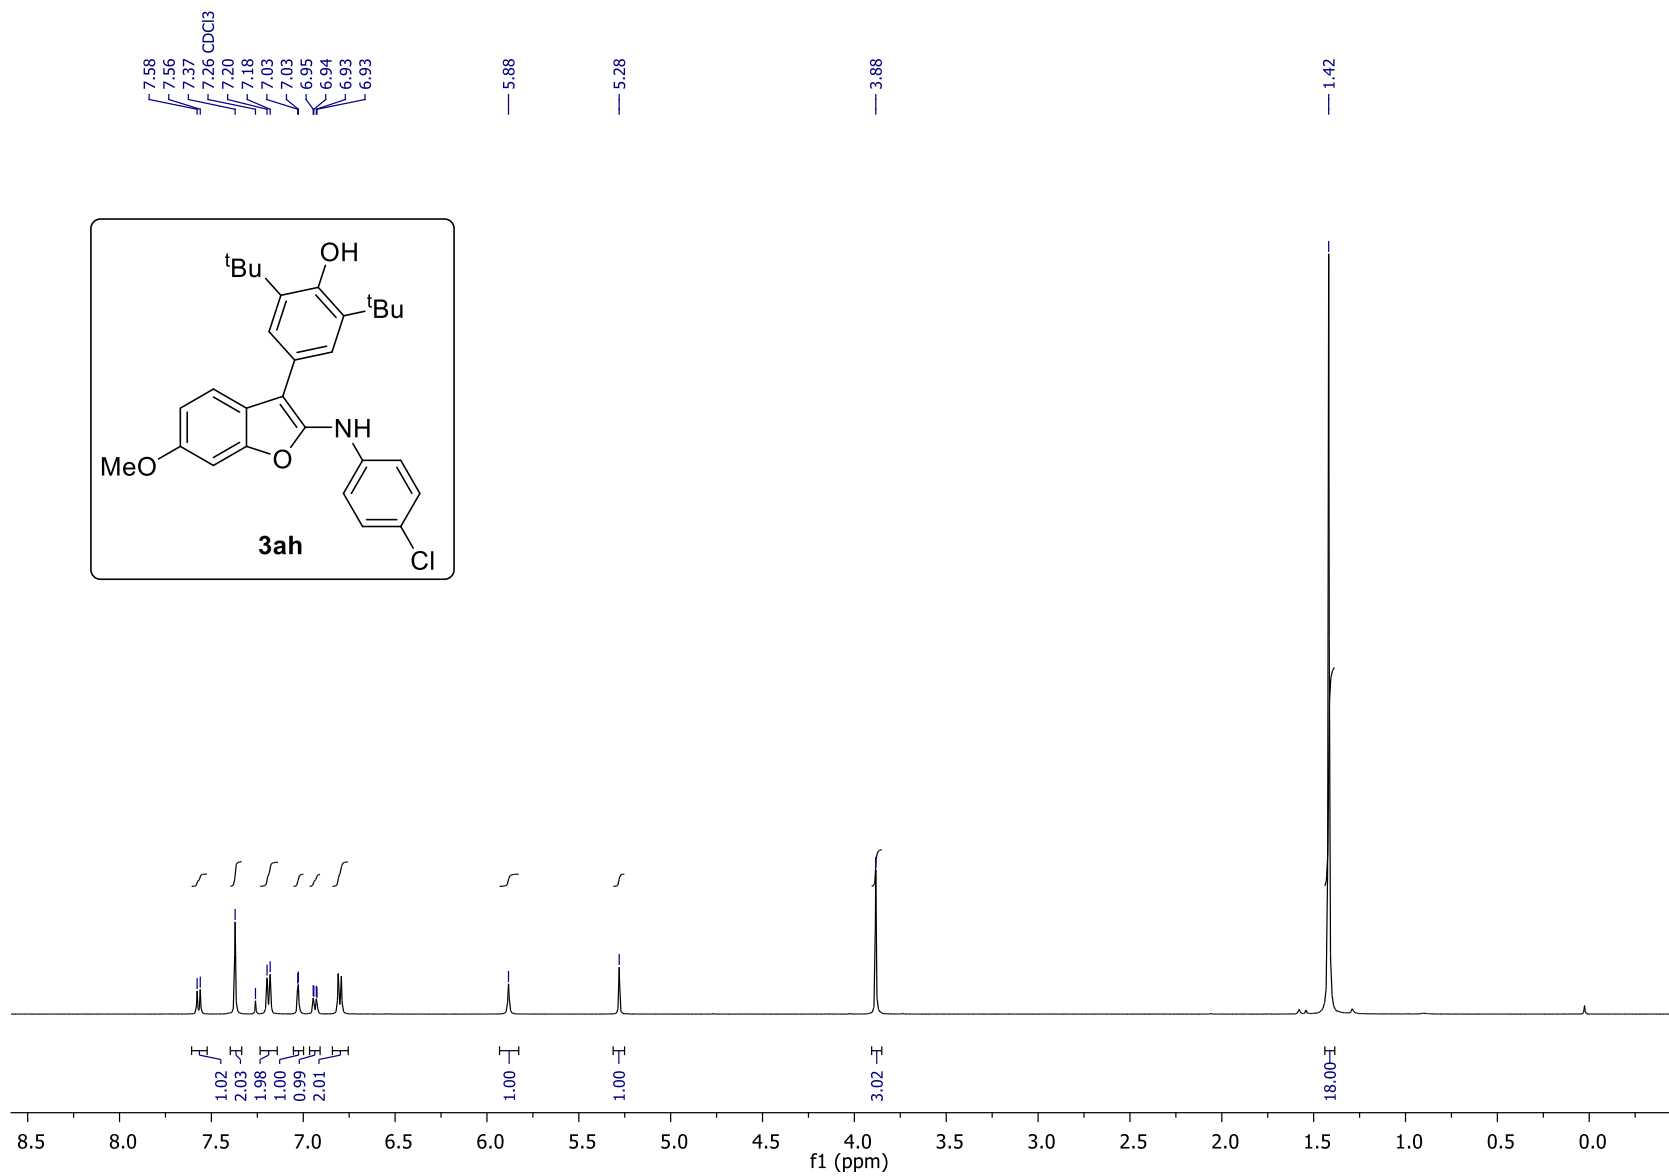

$^{13}\text{C}$  NMR of compound **3ah** in  $\text{CDCl}_3$

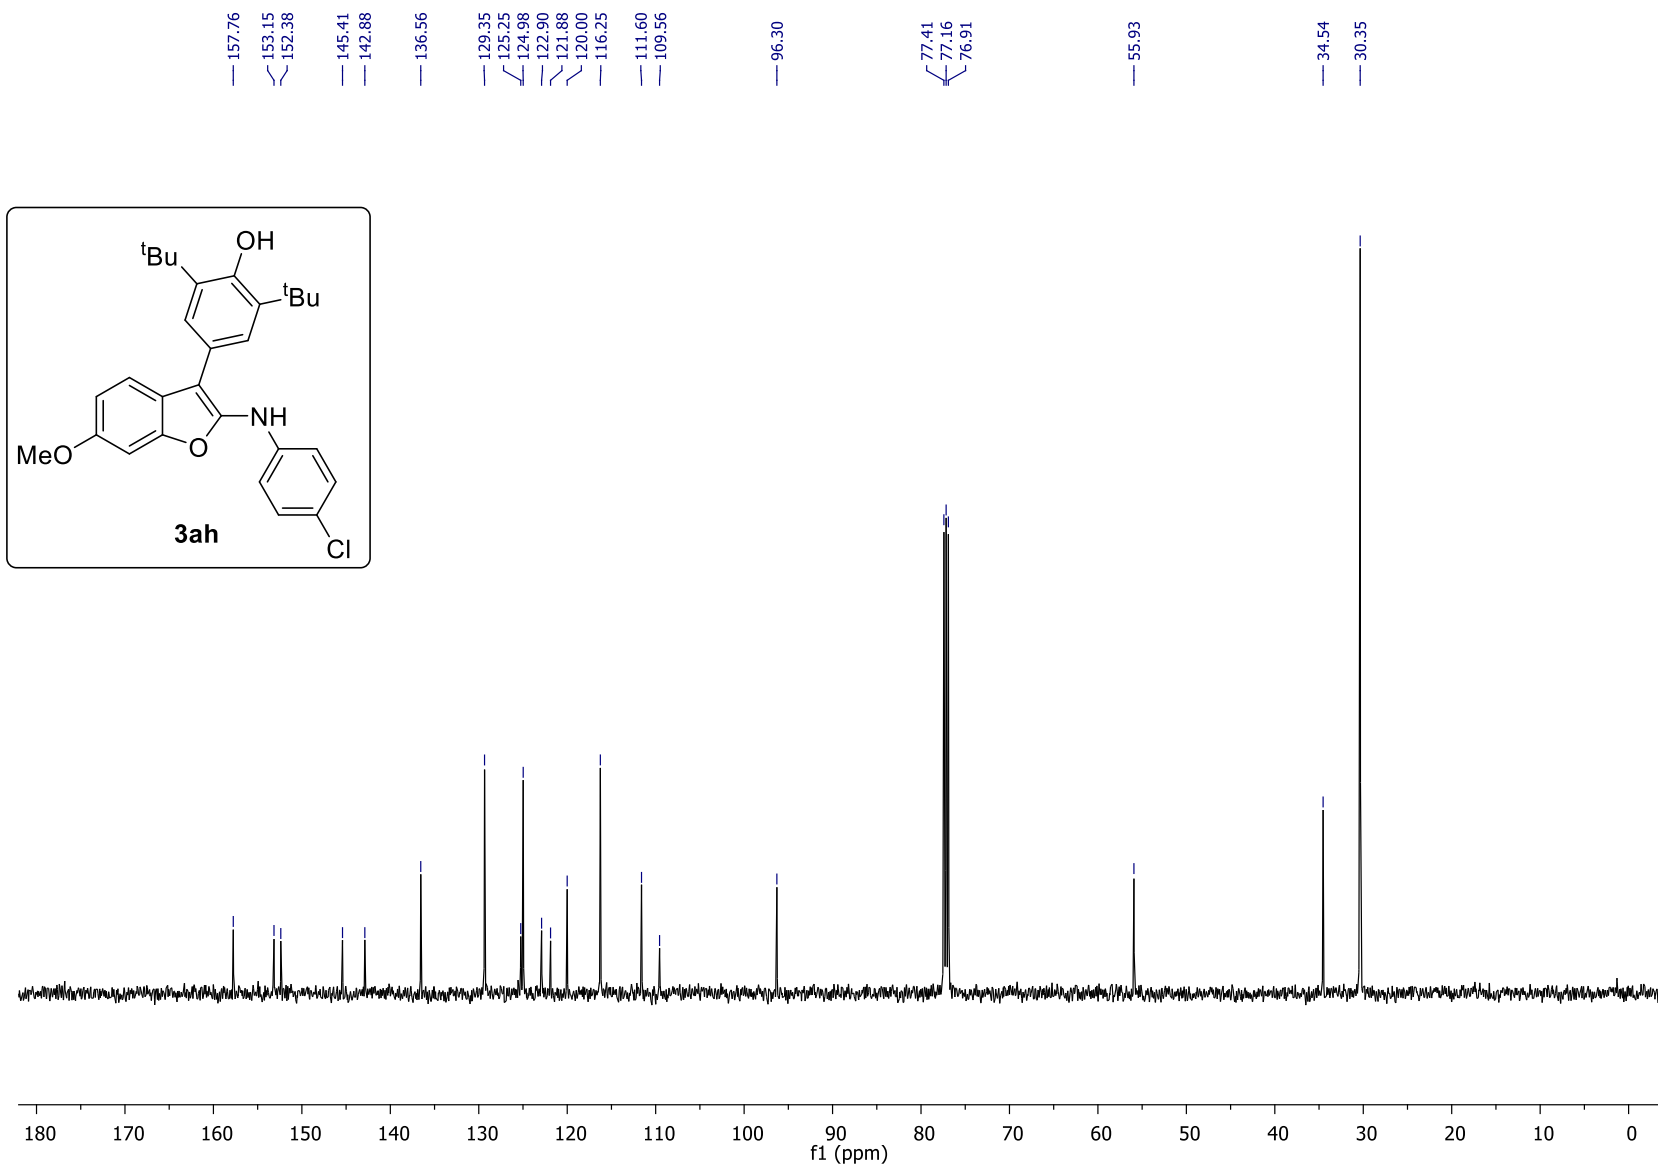

$^1\text{H}$  NMR of compound **3ai** in  $\text{CDCl}_3$

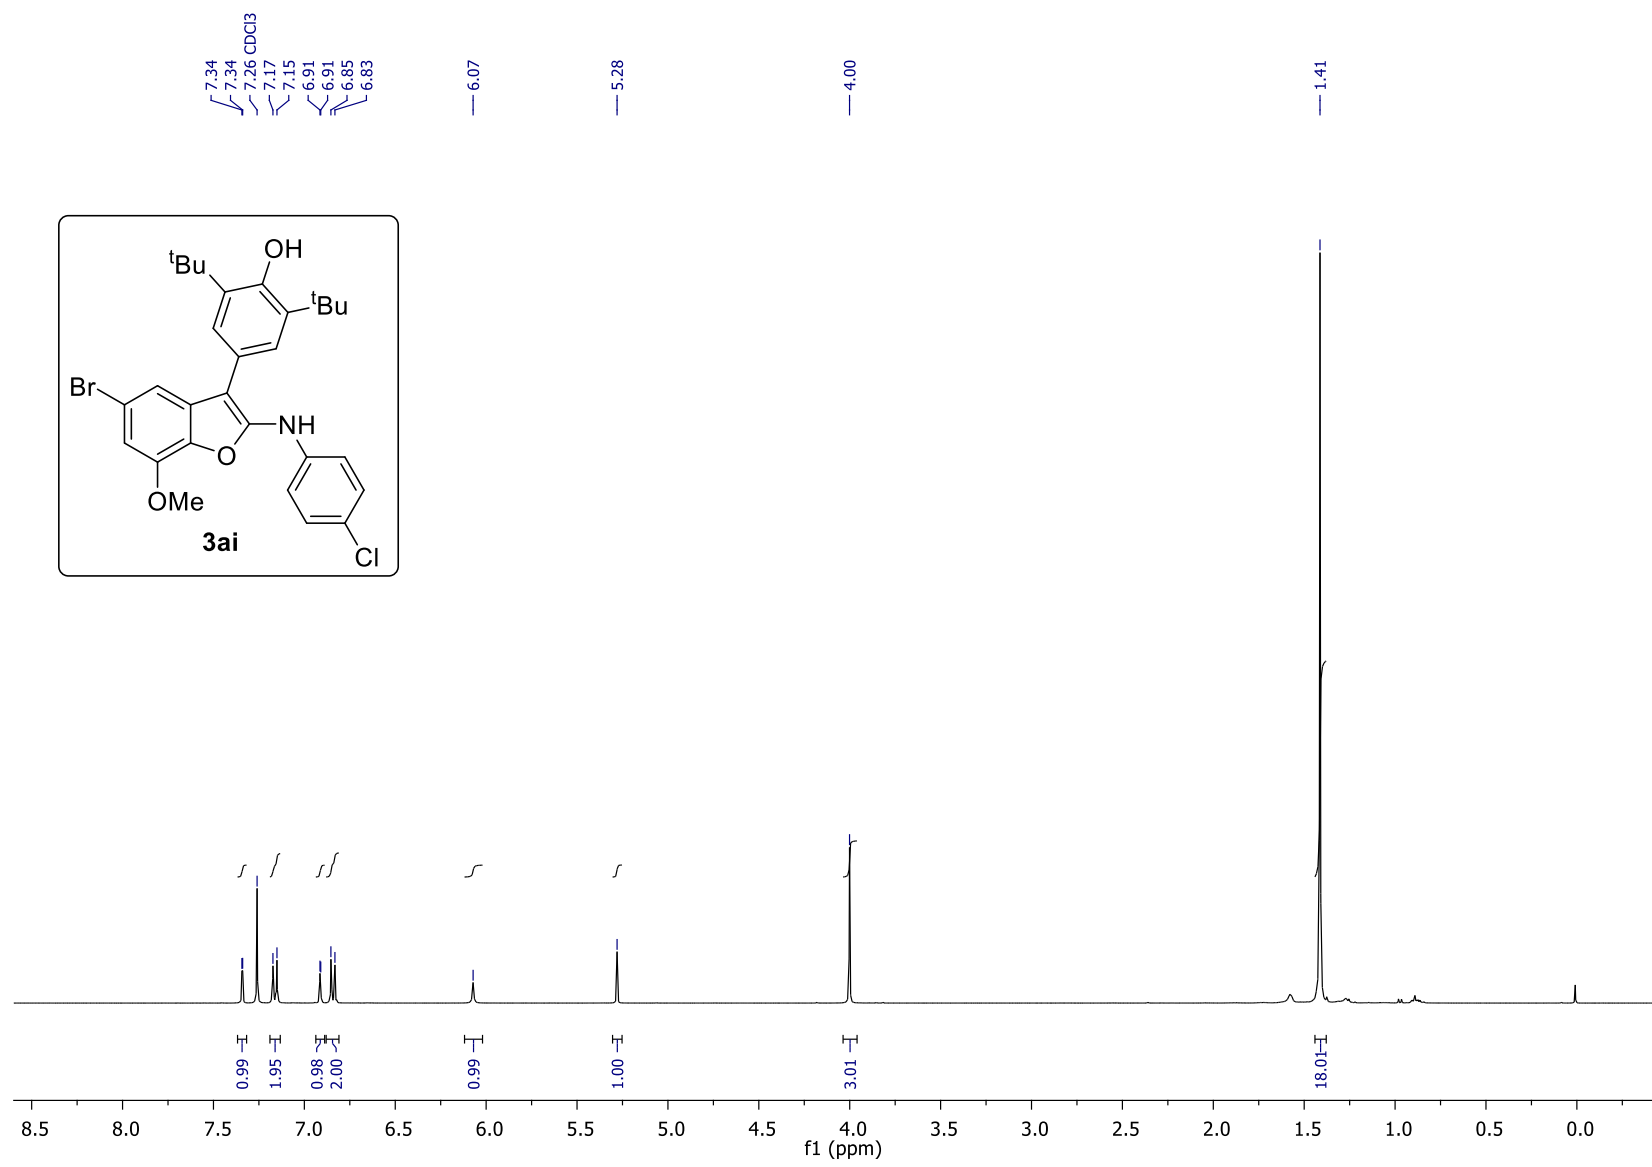

$^{13}\text{C}$  NMR of compound **3ai** in  $\text{CDCl}_3$

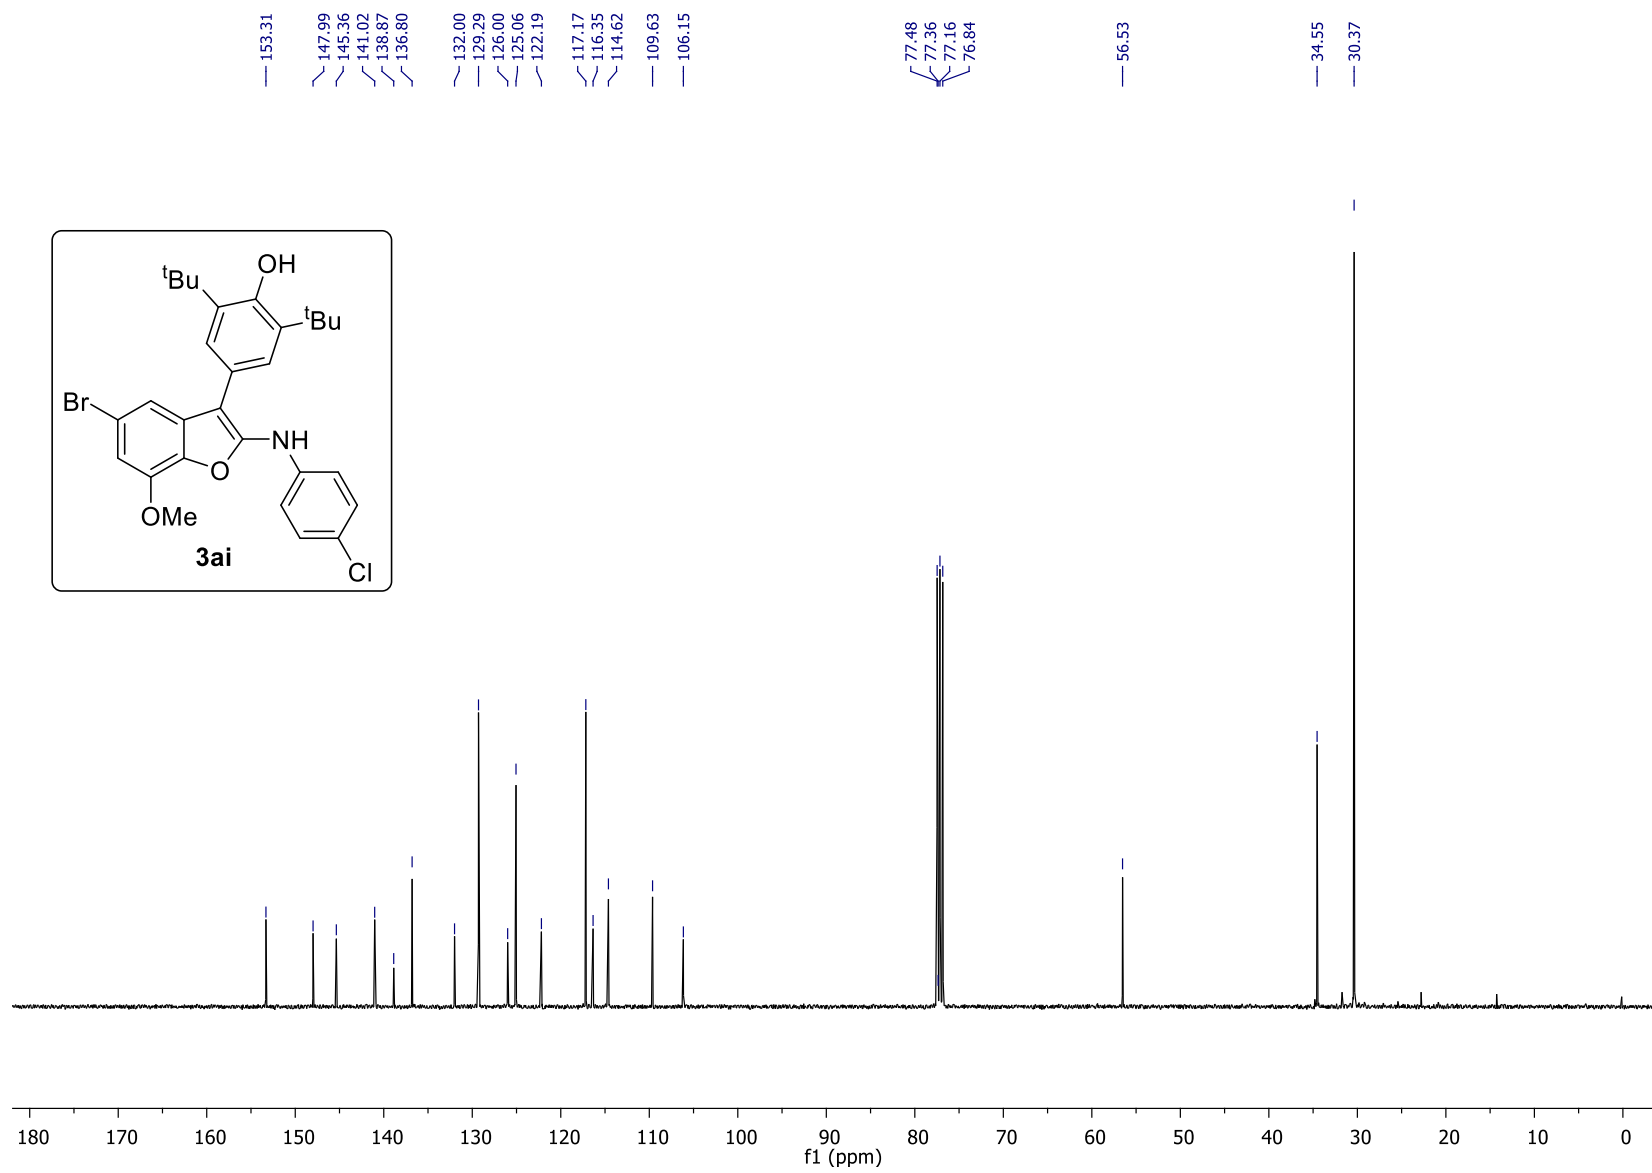

$^1\text{H}$  NMR of compound **3ba** in  $\text{CDCl}_3$

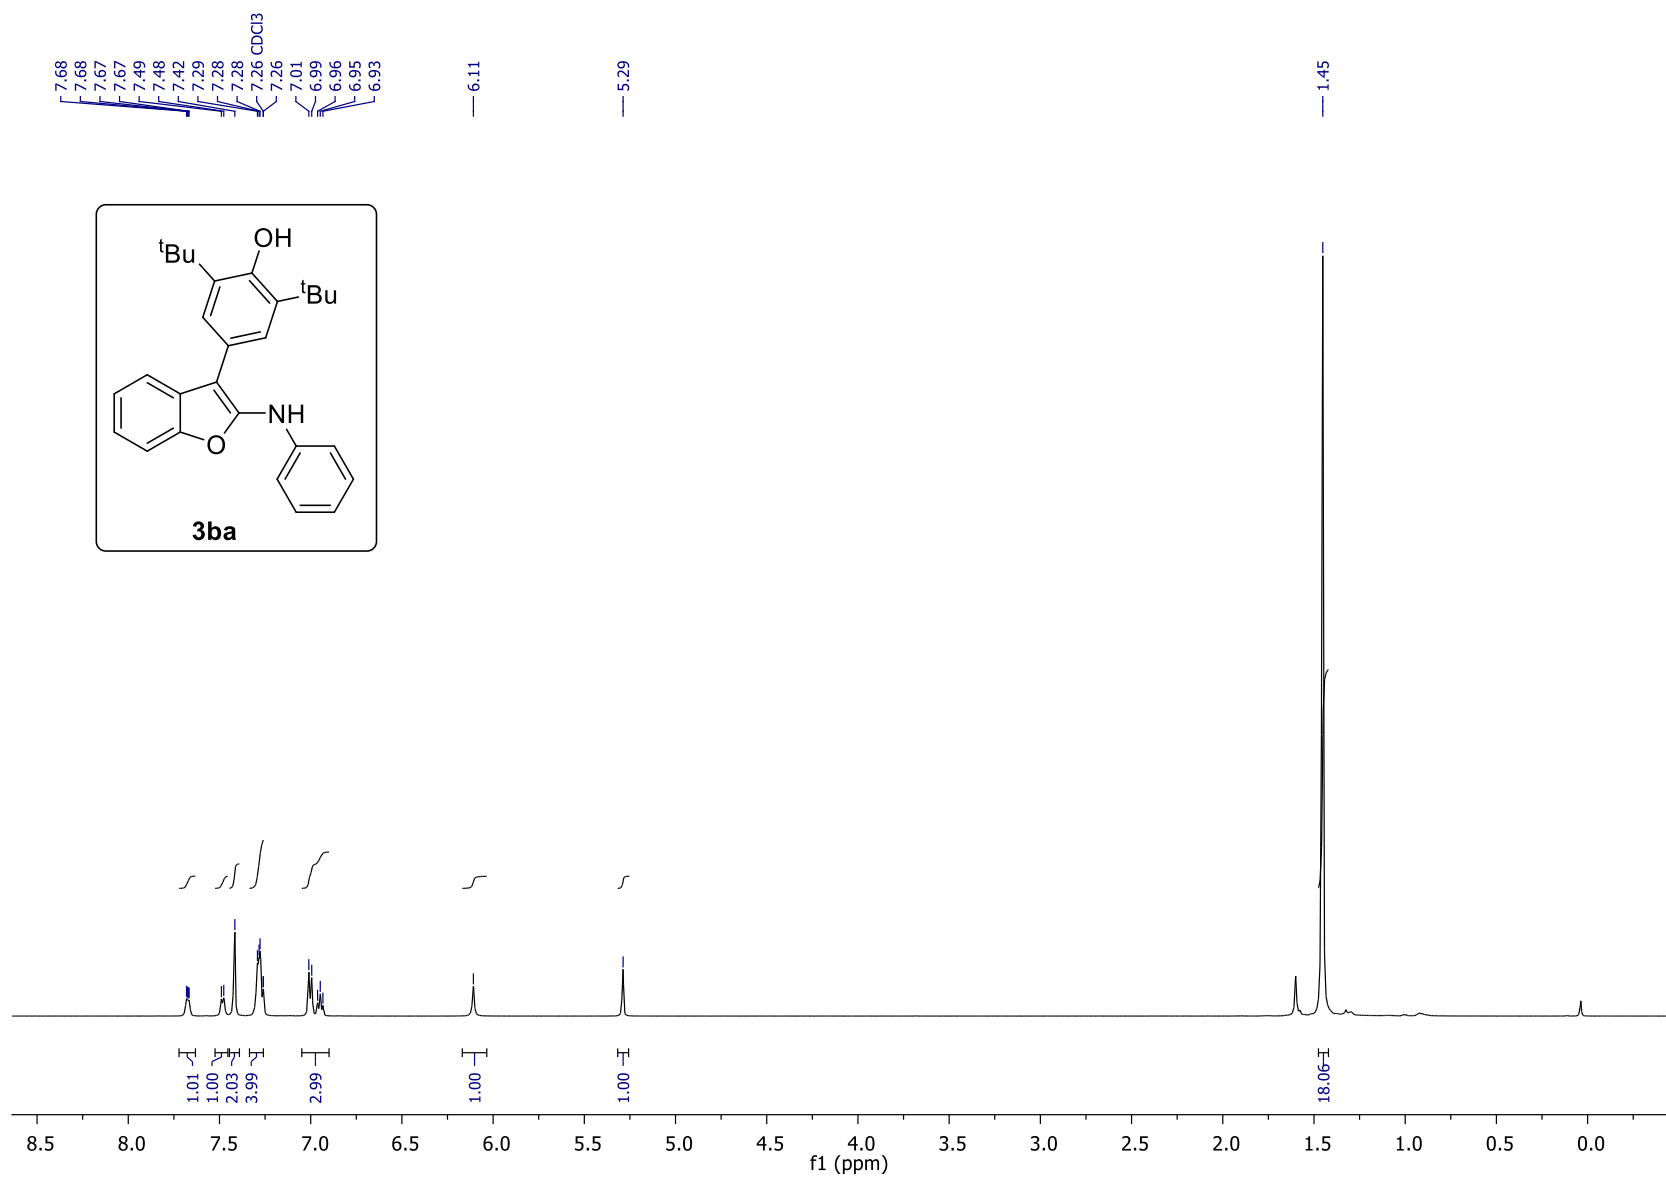

$^{13}\text{C}$  NMR of compound **3ba** in  $\text{CDCl}_3$

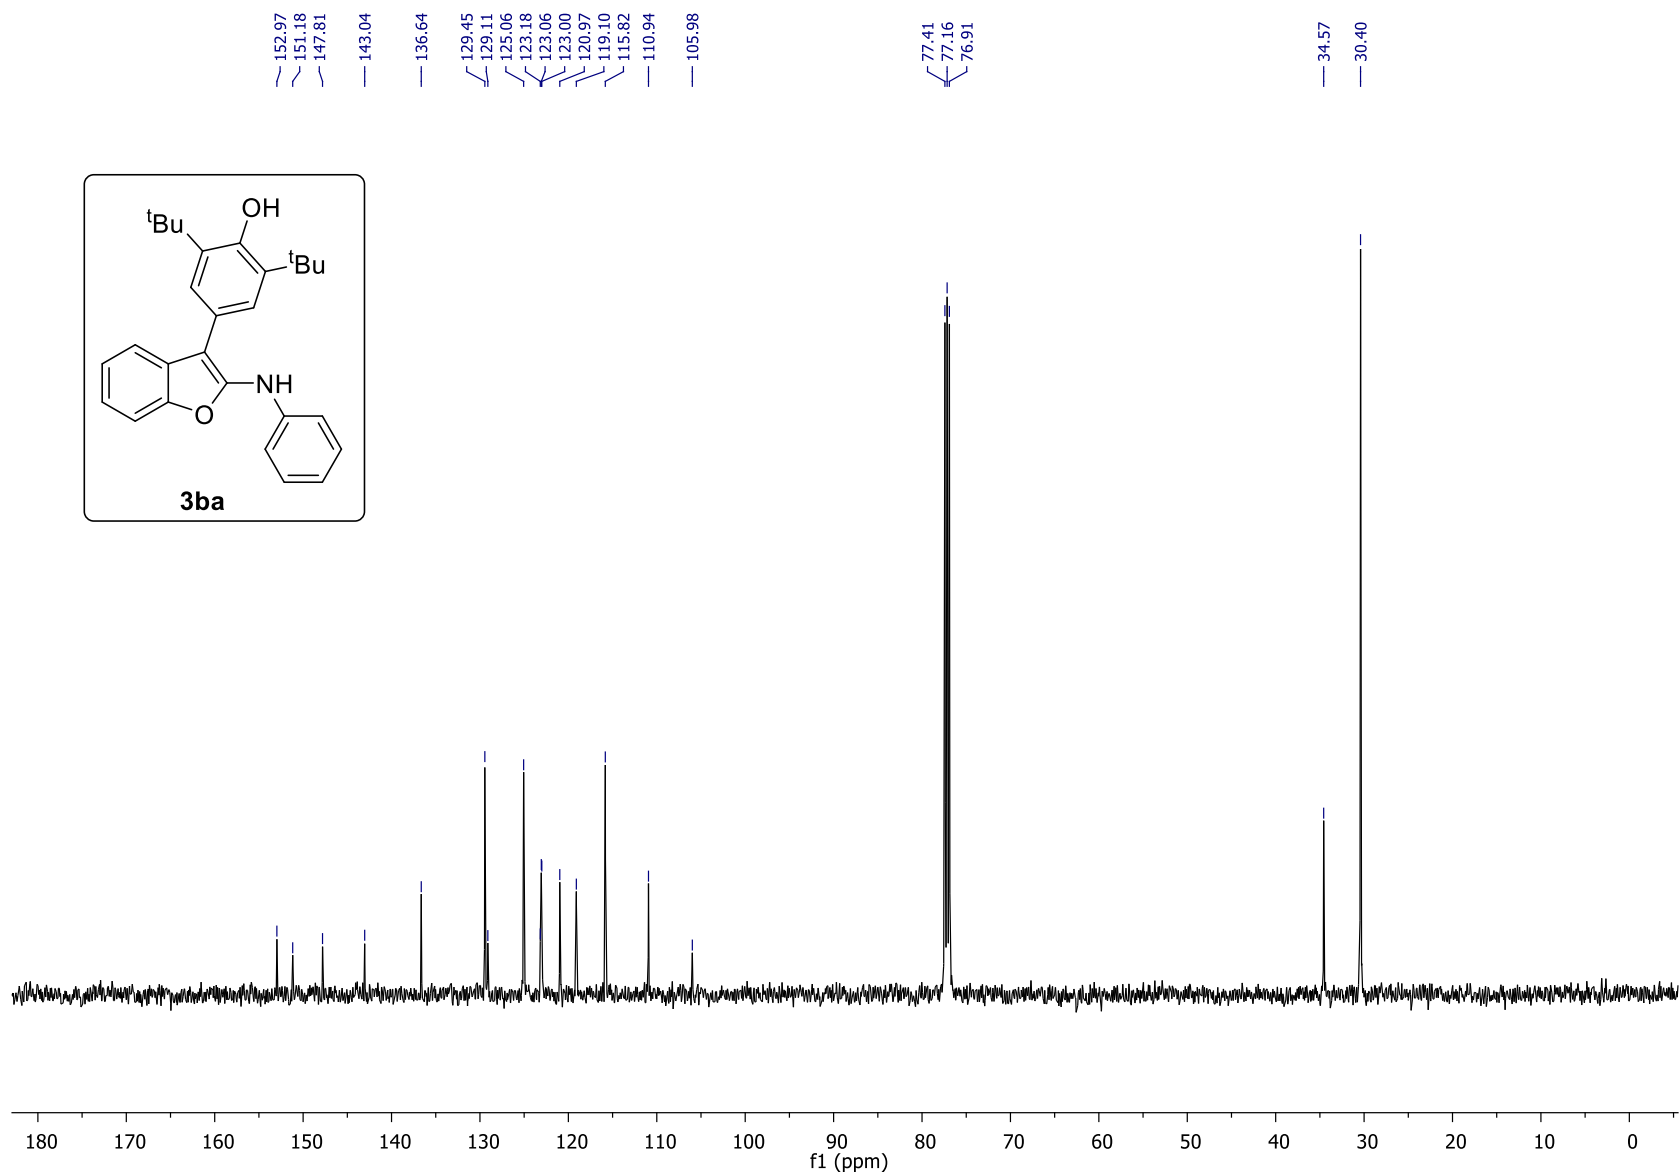



$^1\text{H}$  NMR of compound **3ca** in  $\text{CDCl}_3$

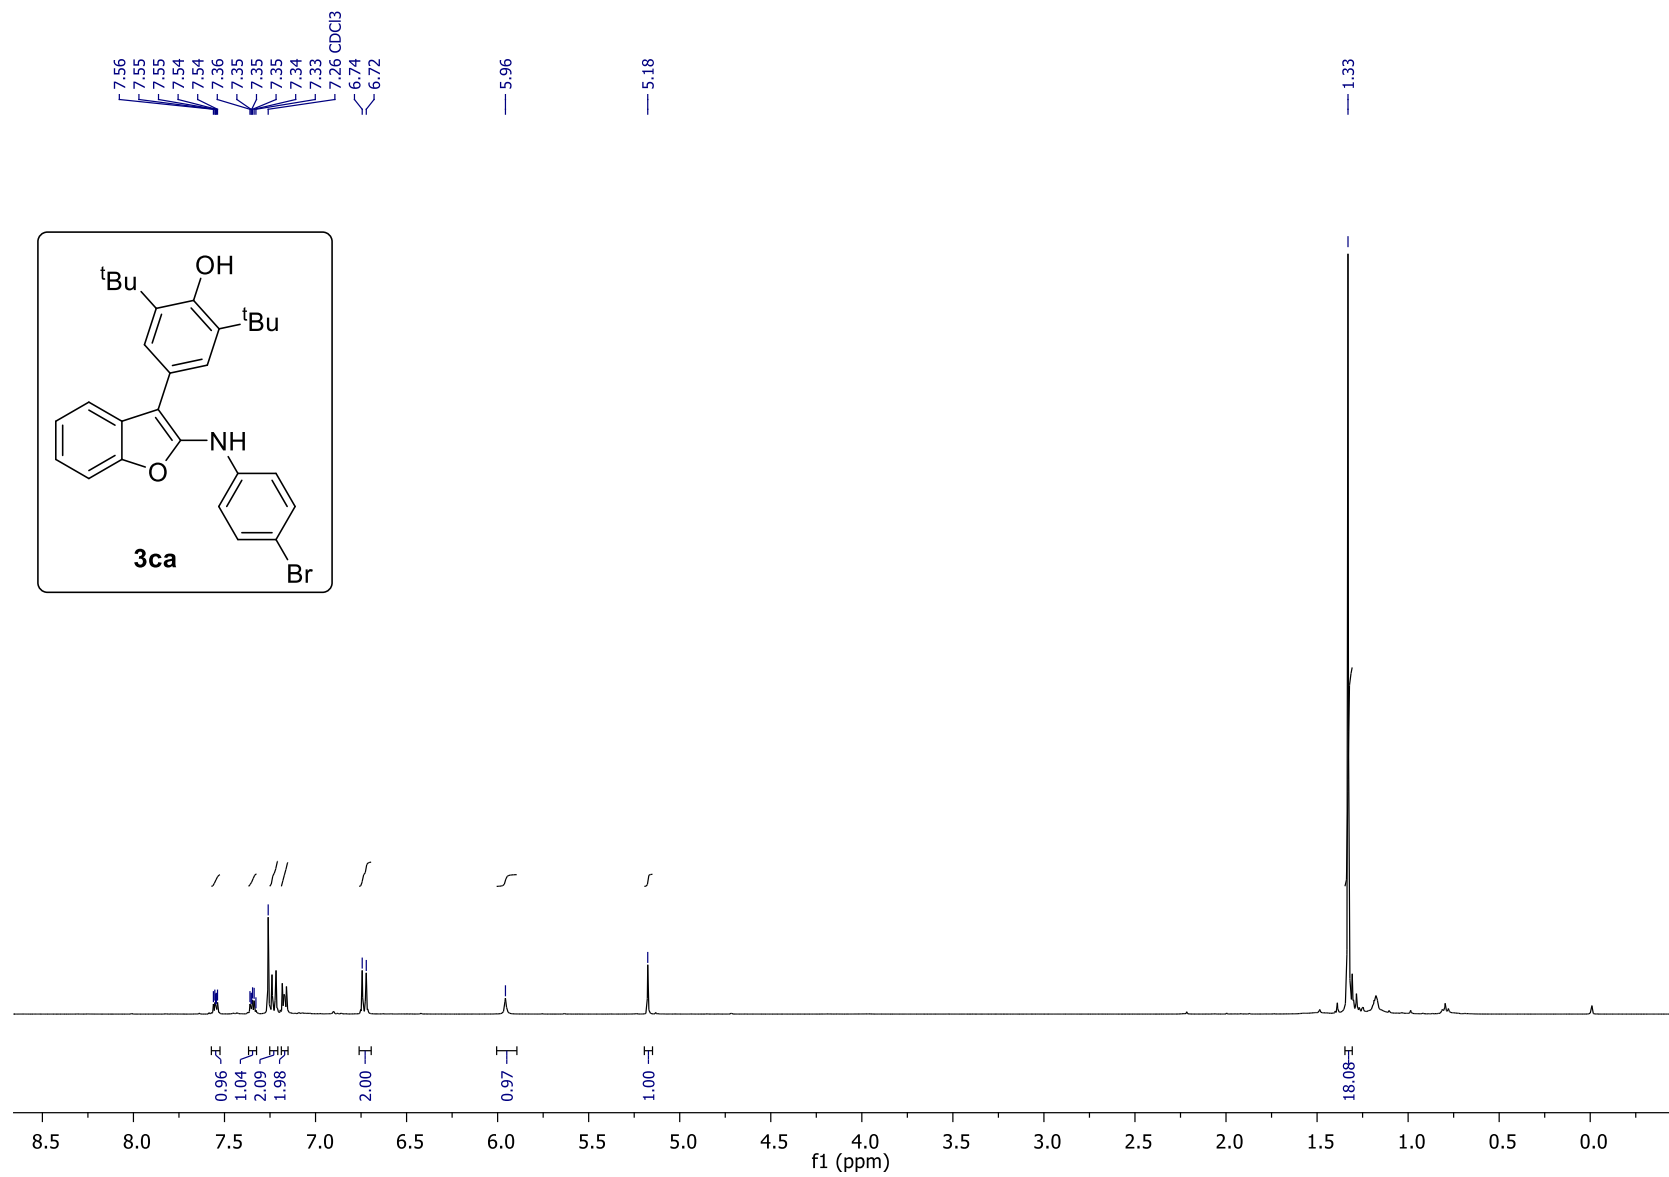

$^{13}\text{C}$  NMR of compound **3ca** in  $\text{CDCl}_3$

153.12  
151.23  
146.95  
142.18  
136.72  
132.24  
128.96  
125.06  
123.34  
123.19  
122.88  
119.31  
117.36  
112.97  
110.99  
106.81

77.48  
77.16  
76.84

34.58  
30.41

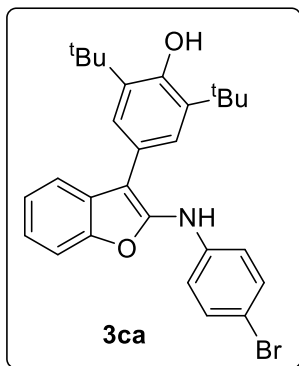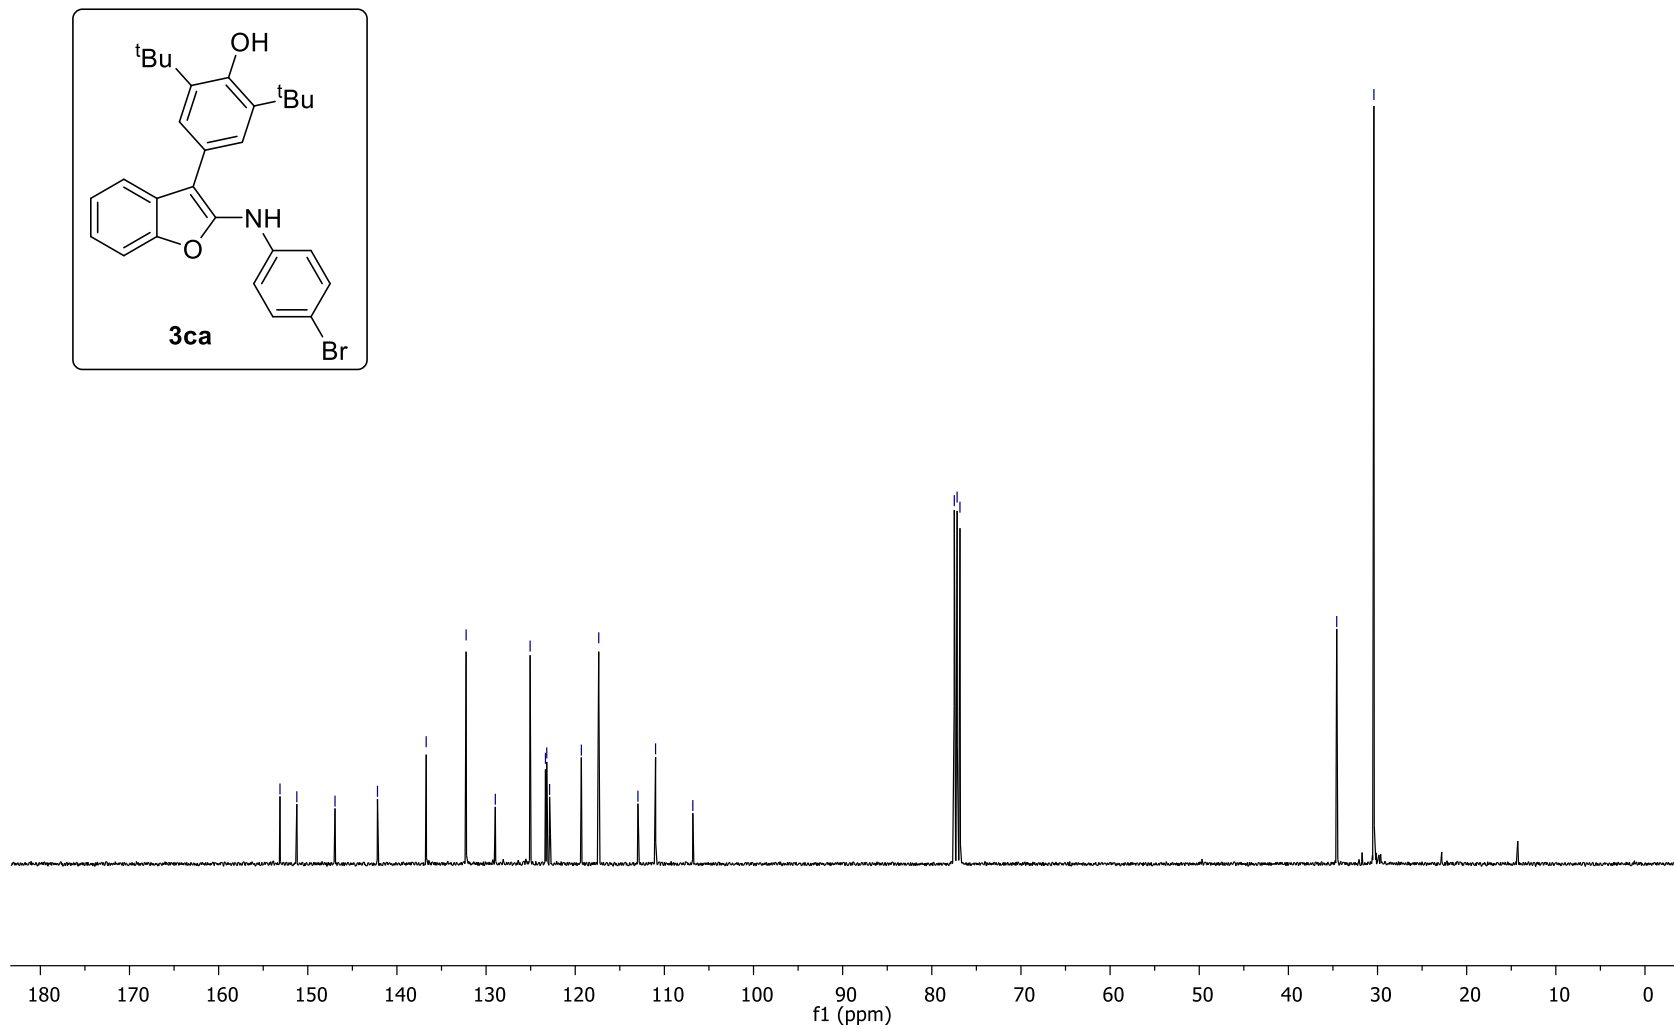

$^1\text{H}$  NMR of compound **3da** in  $\text{CDCl}_3$

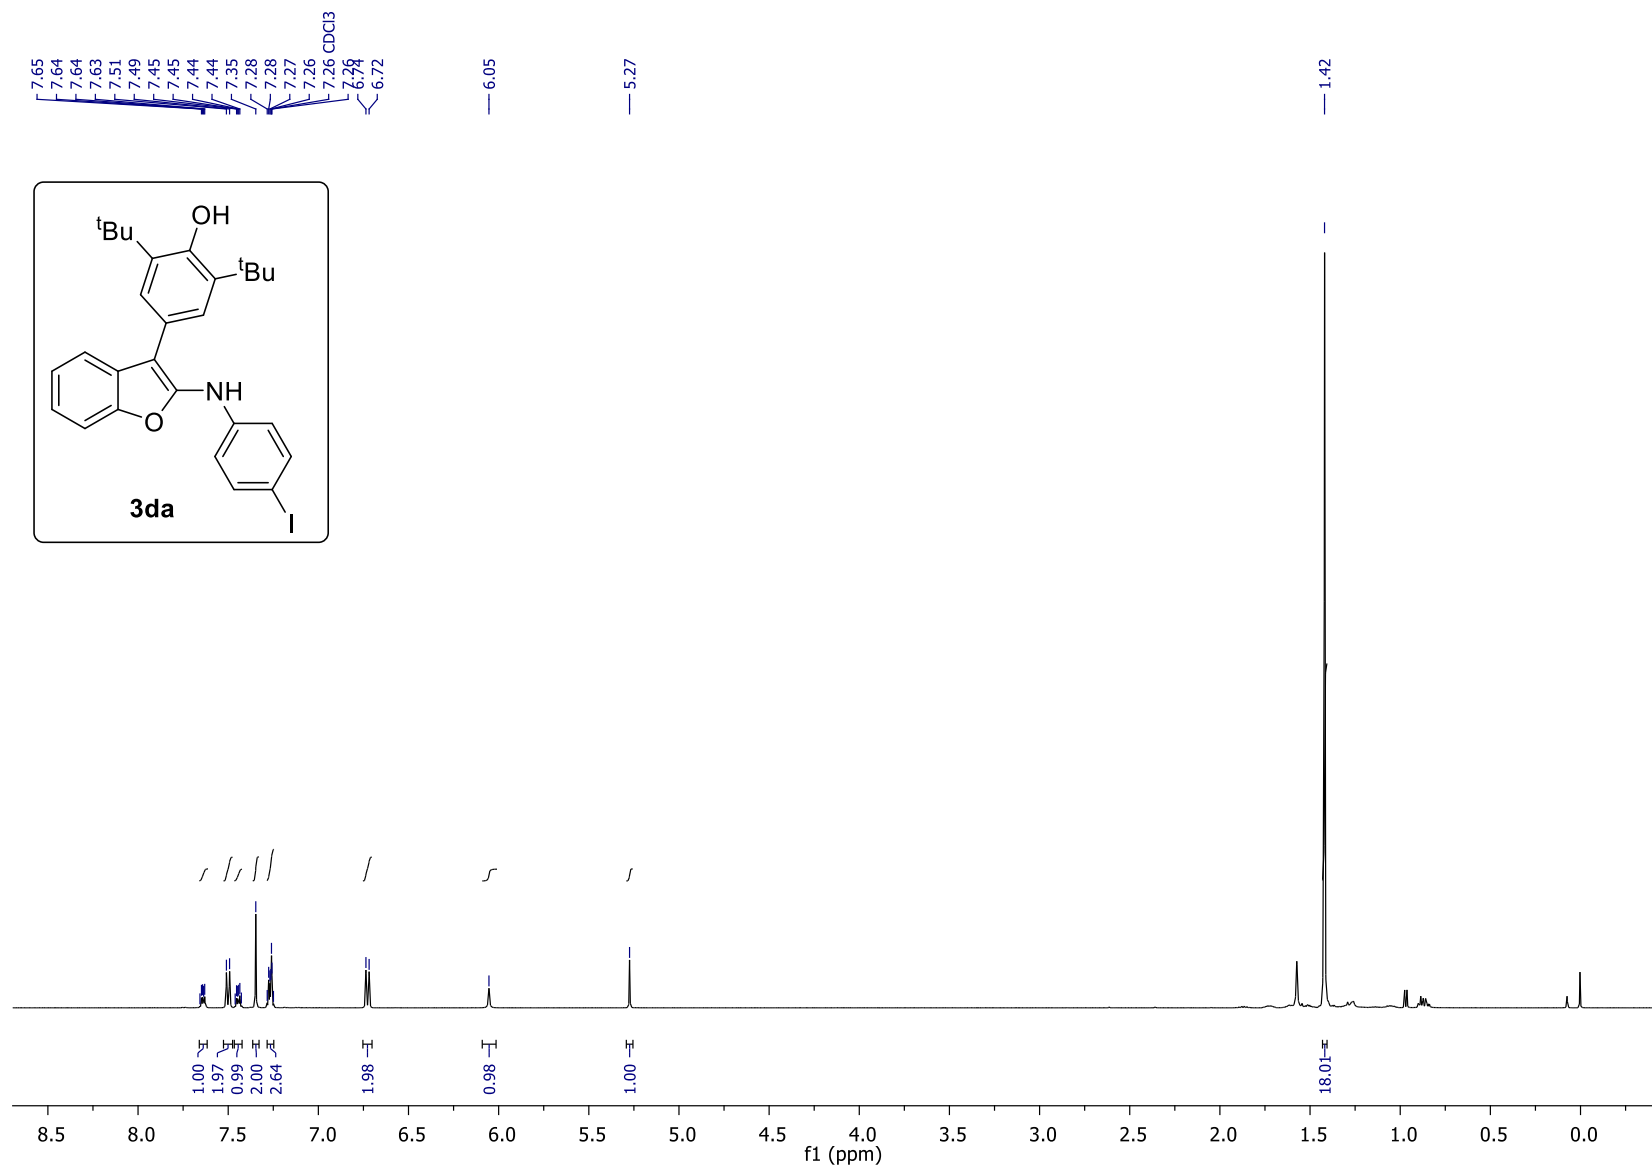

$^{13}\text{C}$  NMR of compound **3da** in  $\text{CDCl}_3$

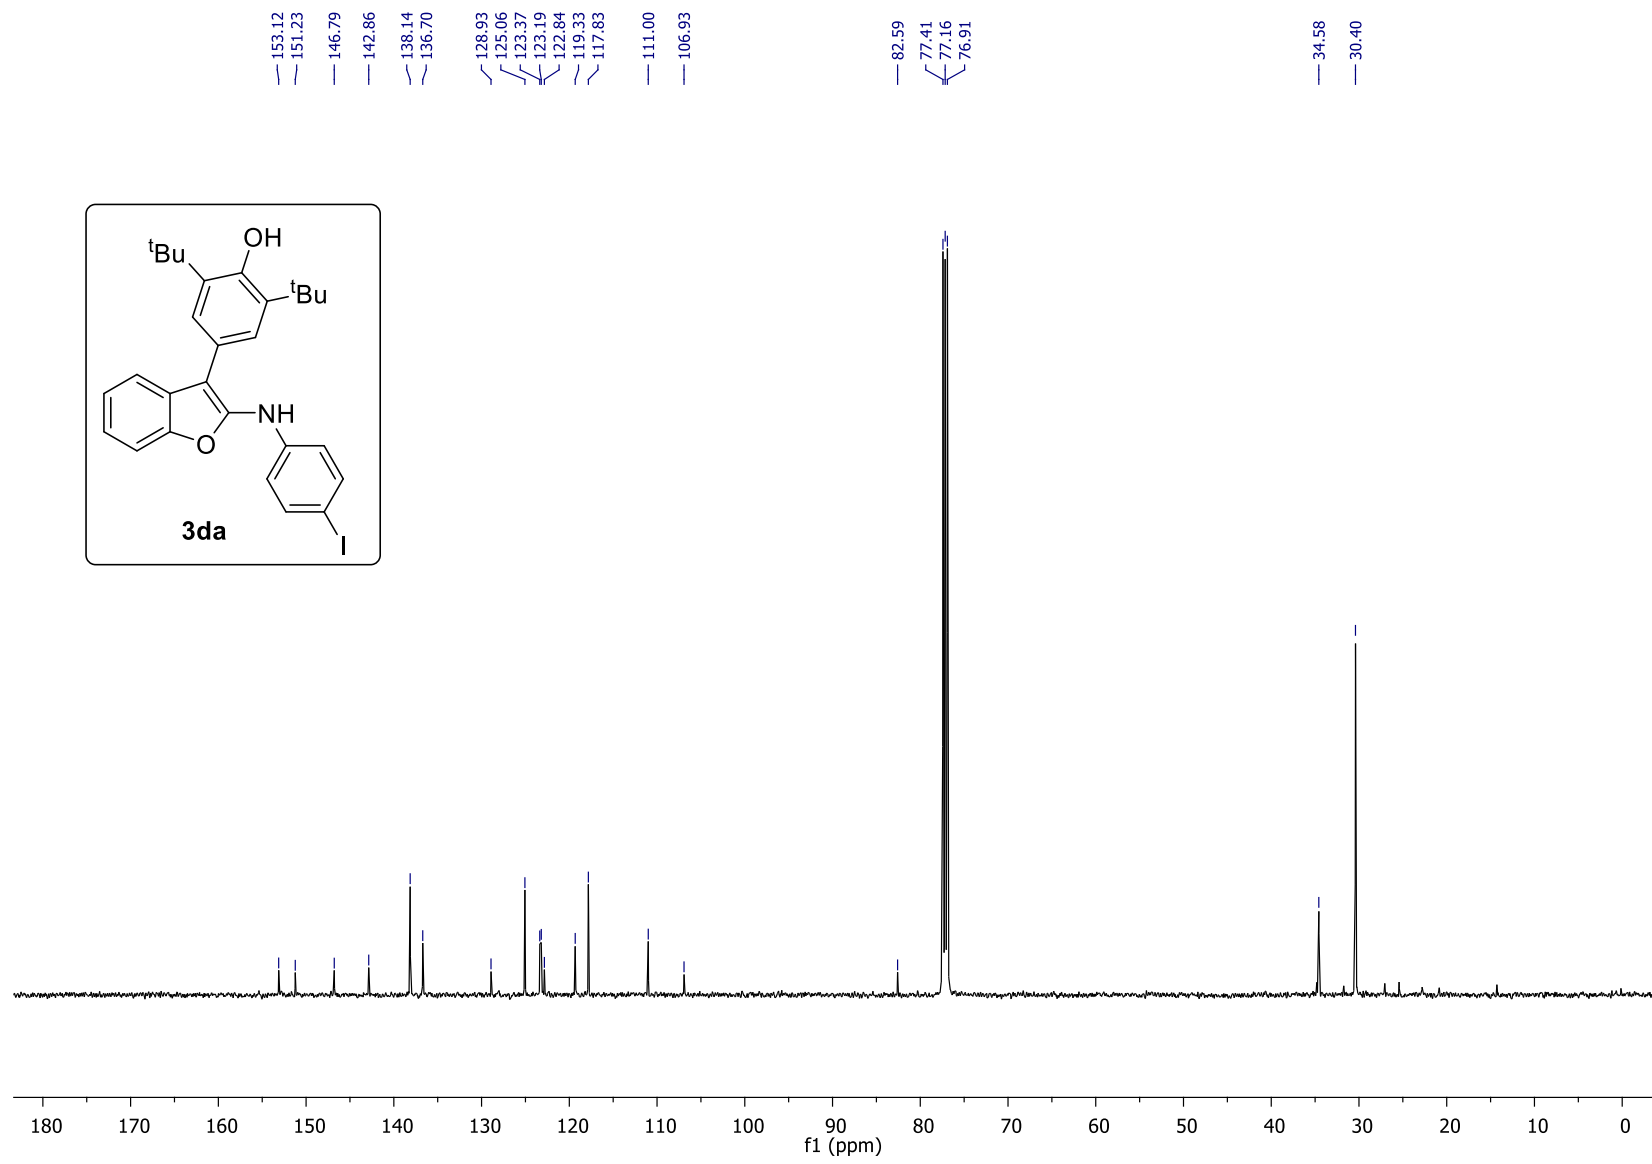

$^1\text{H}$  NMR of compound **3ea** in  $\text{CDCl}_3$

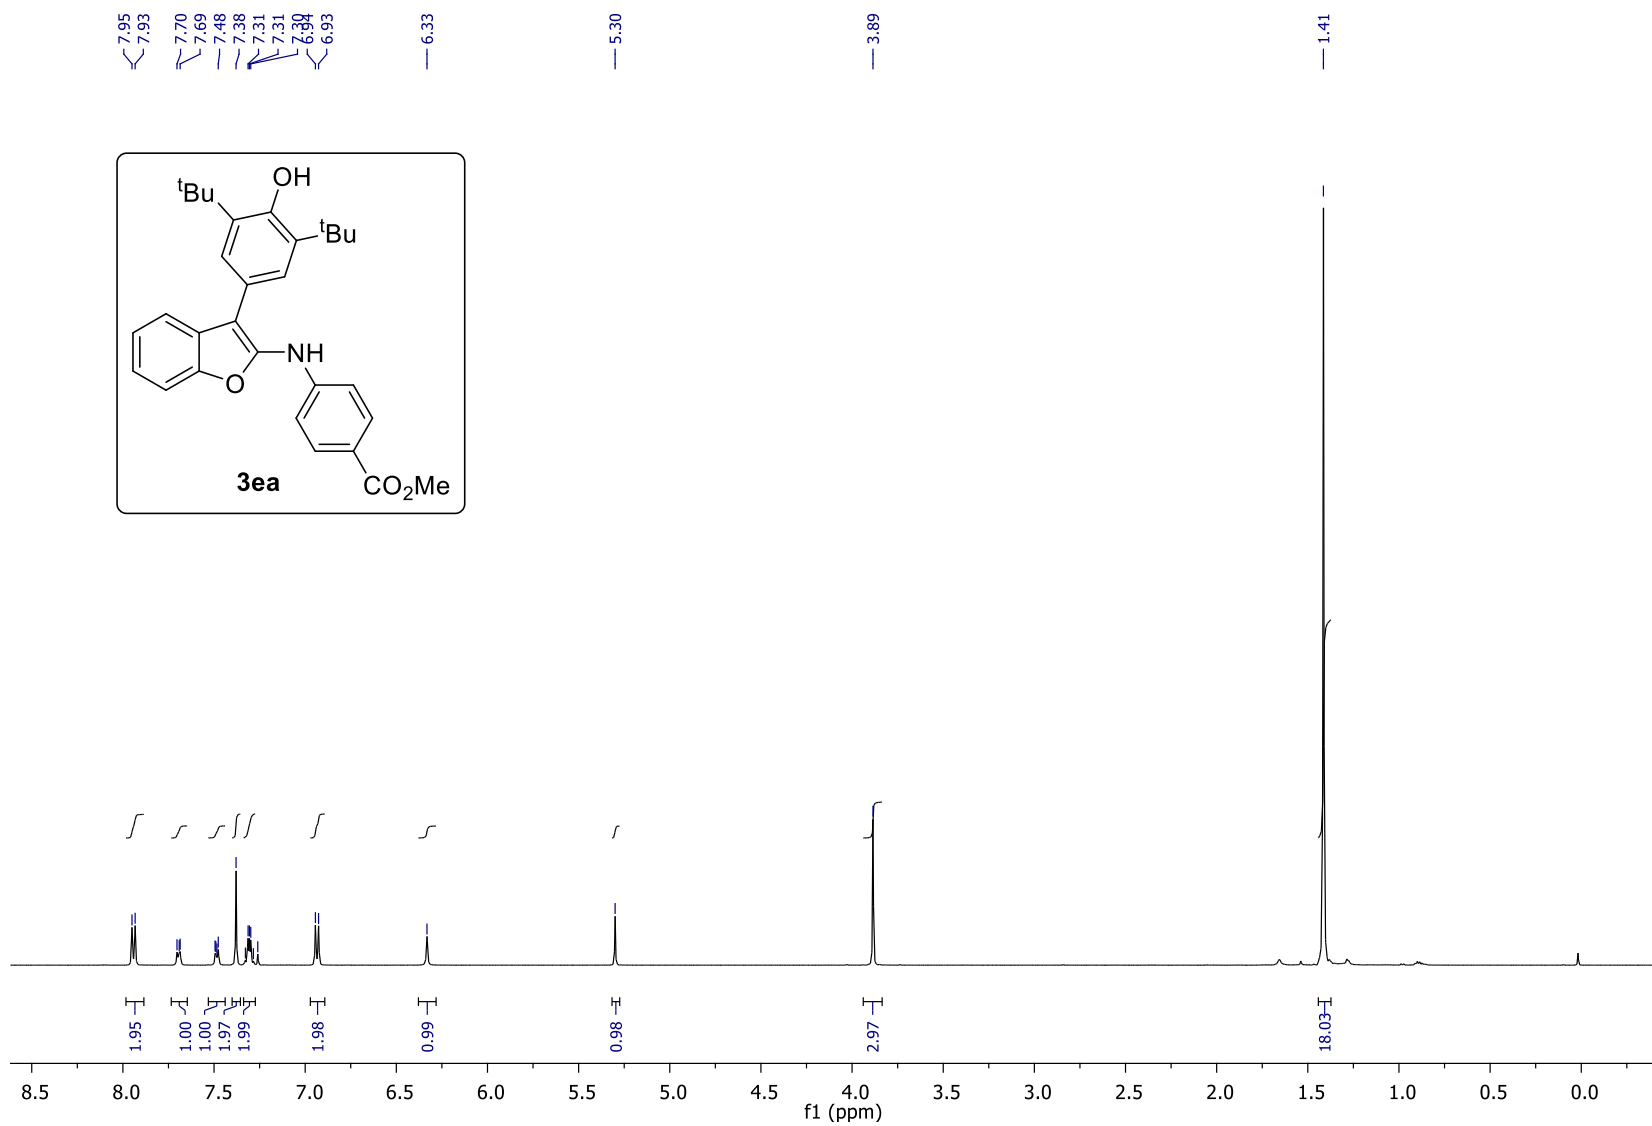

$^{13}\text{C}$  NMR of compound **3ea** in  $\text{CDCl}_3$

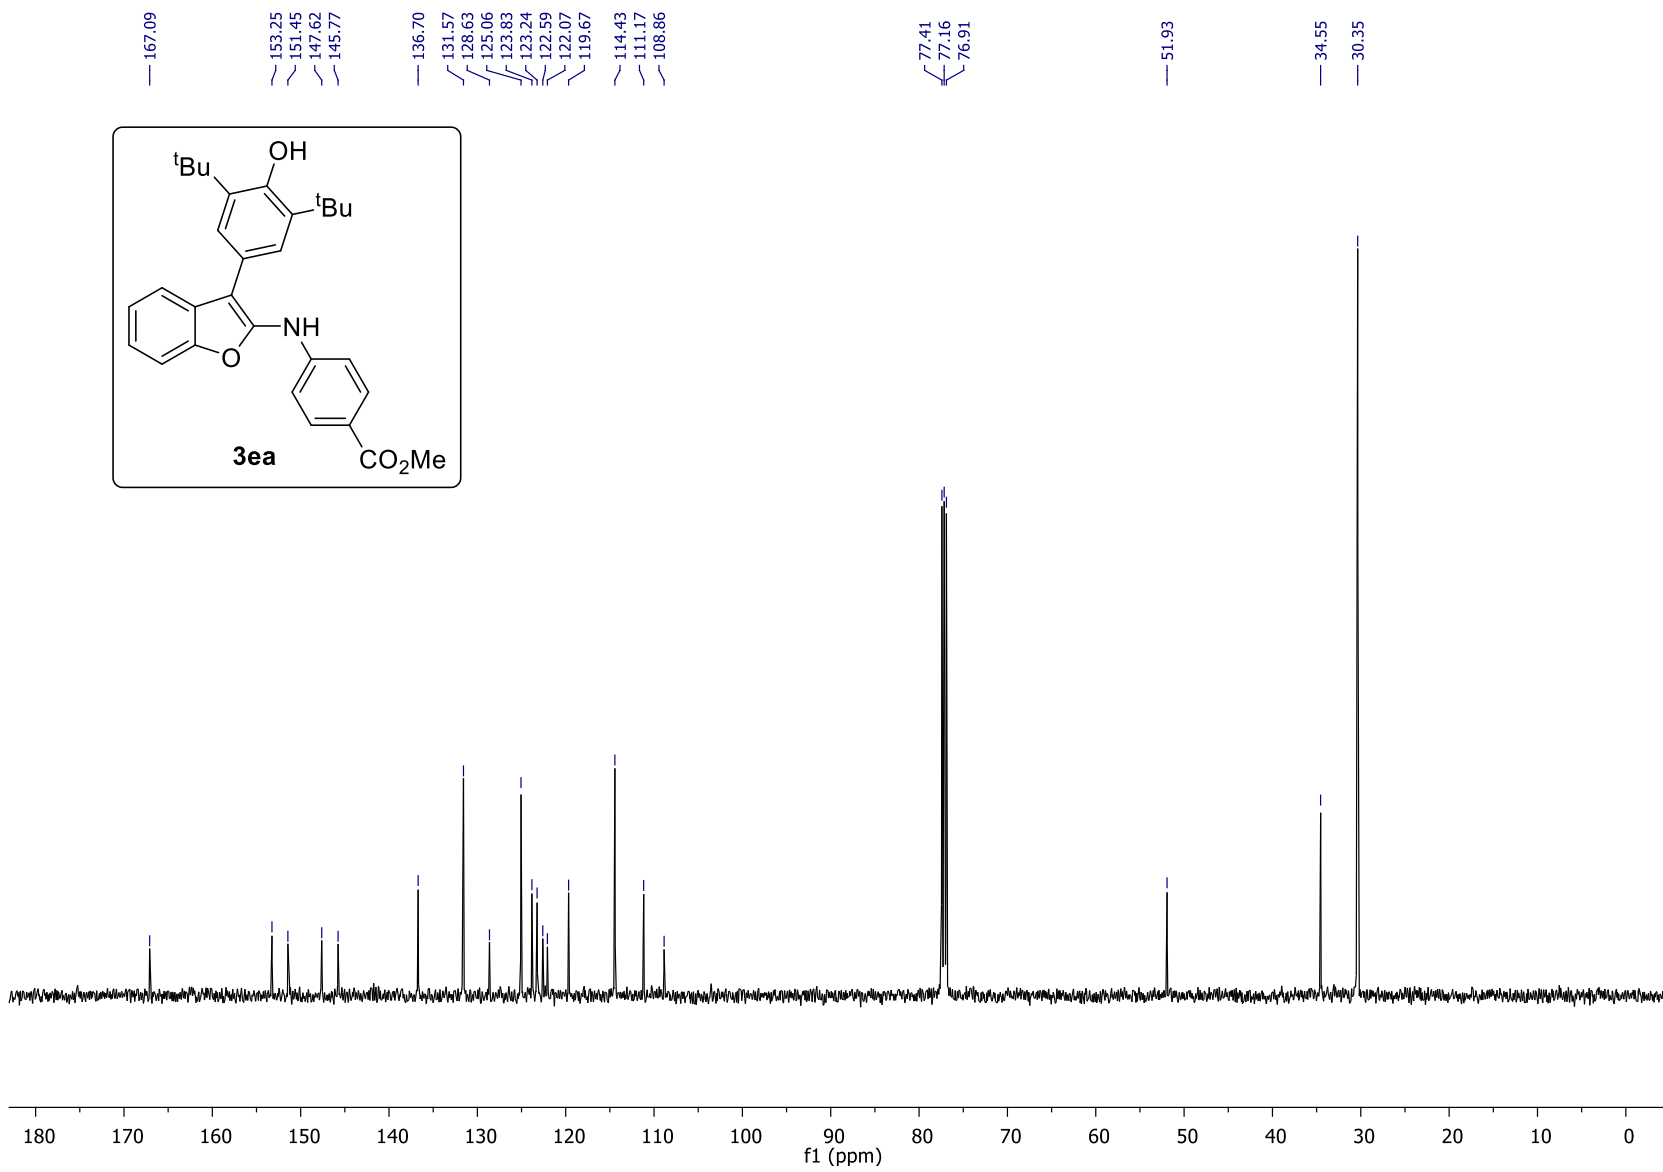

167.09  
153.25  
151.45  
147.62  
145.77  
136.70  
131.57  
128.63  
125.06  
123.83  
123.24  
122.59  
122.07  
119.67  
114.43  
111.17  
108.86

77.41  
77.16  
76.91

51.93

34.55  
30.35

f1 (ppm)

$^1\text{H}$  NMR of compound **3fa** in  $\text{CDCl}_3$

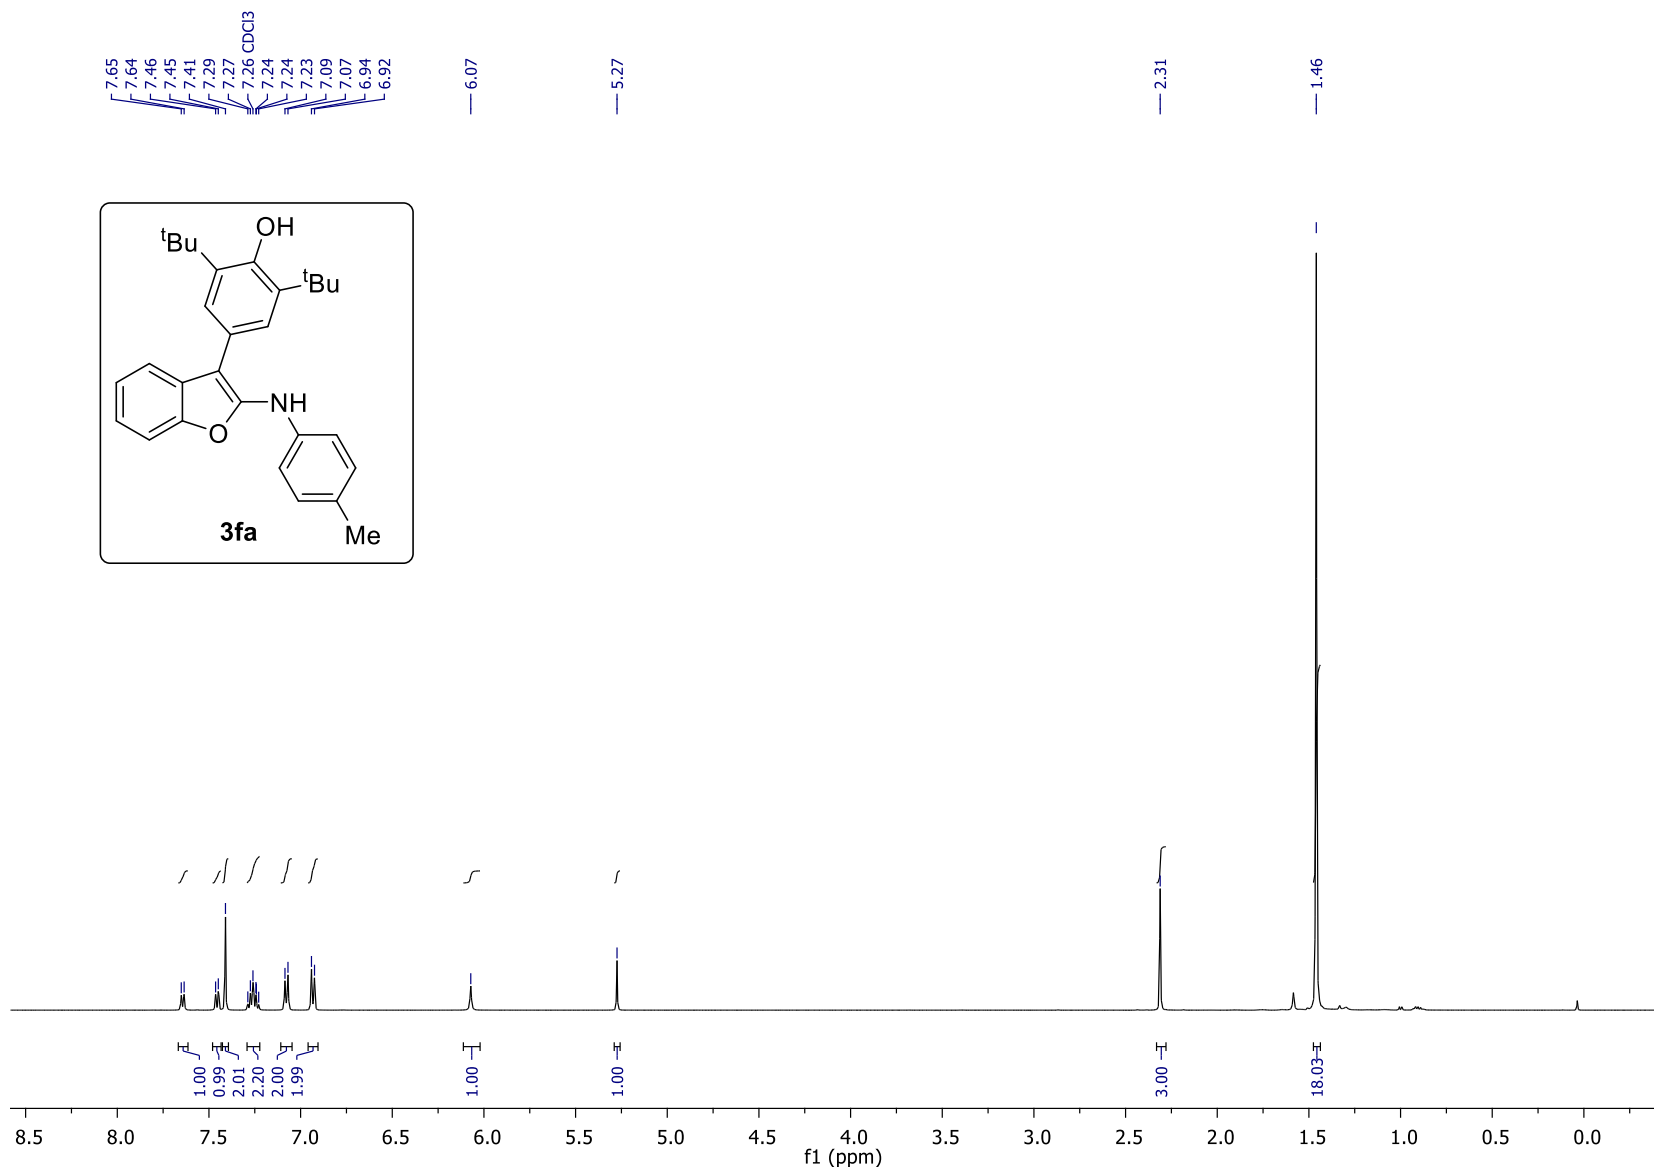

$^{13}\text{C}$  NMR of compound **3fa** in  $\text{CDCl}_3$

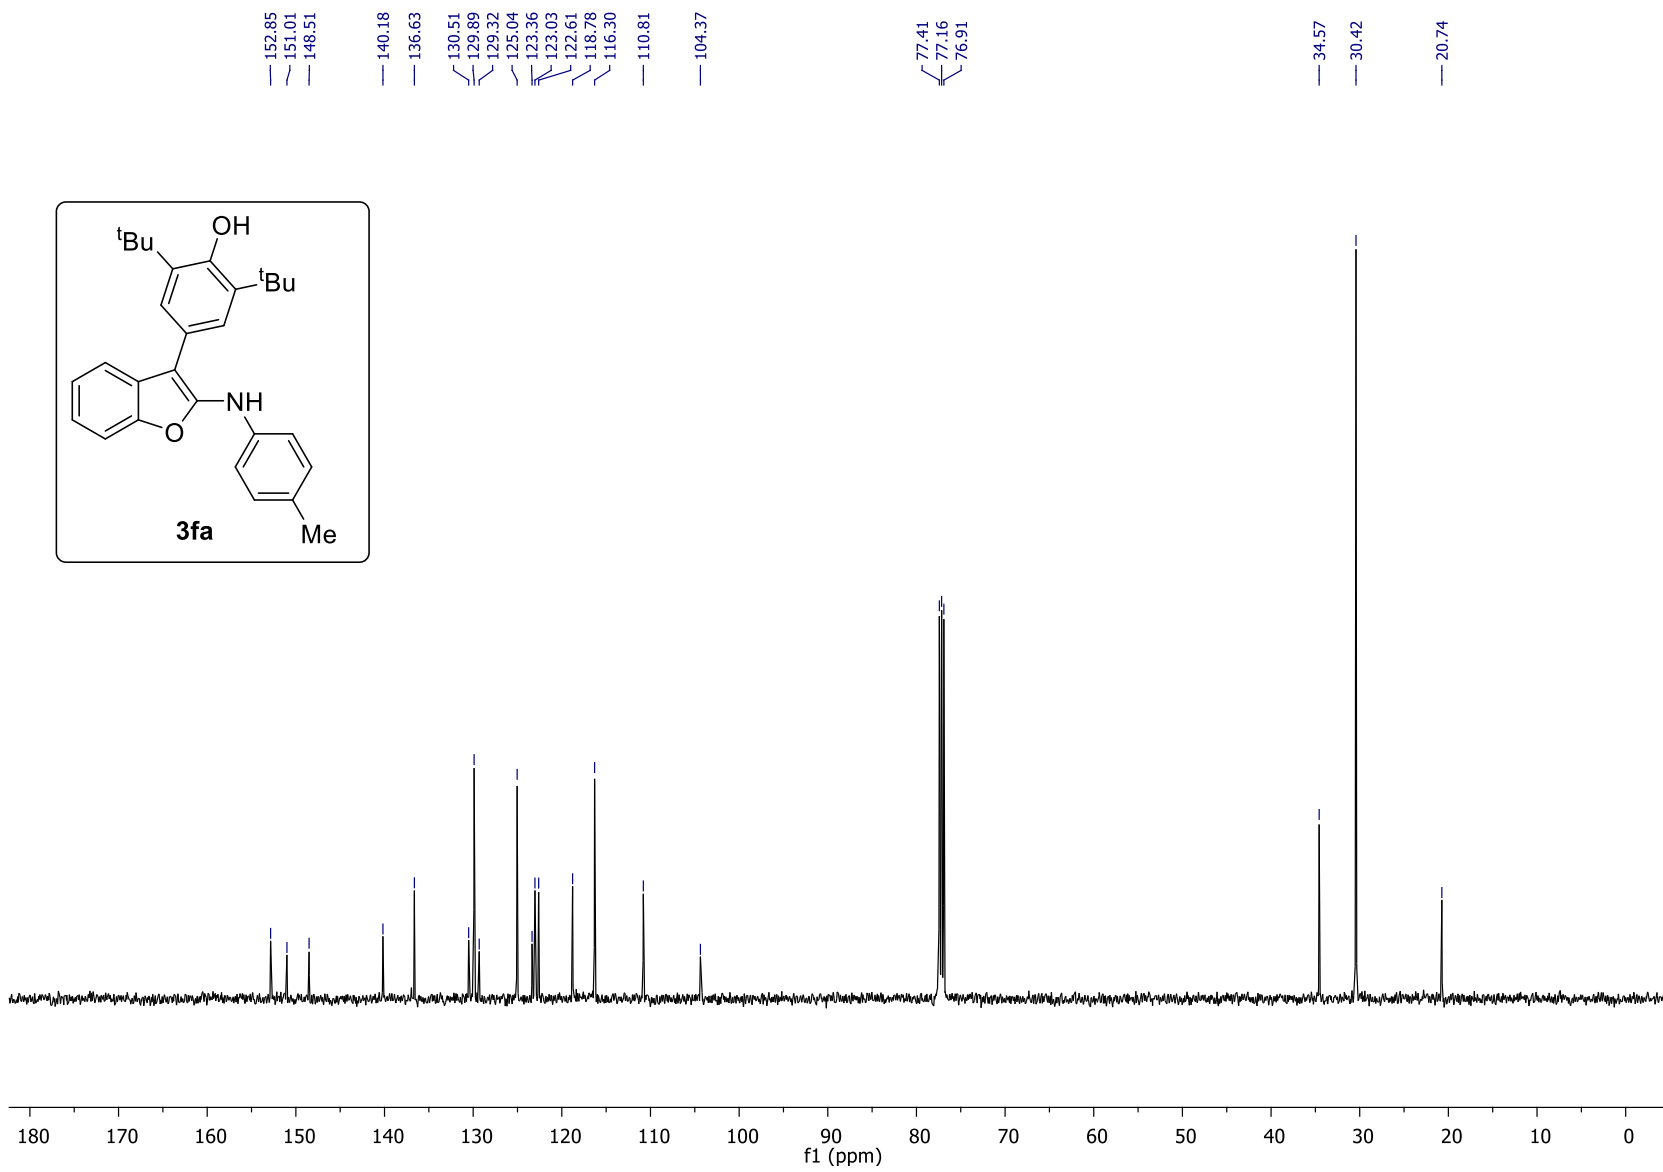



$^1\text{H}$  NMR of compound **3ga** in  $\text{CDCl}_3$

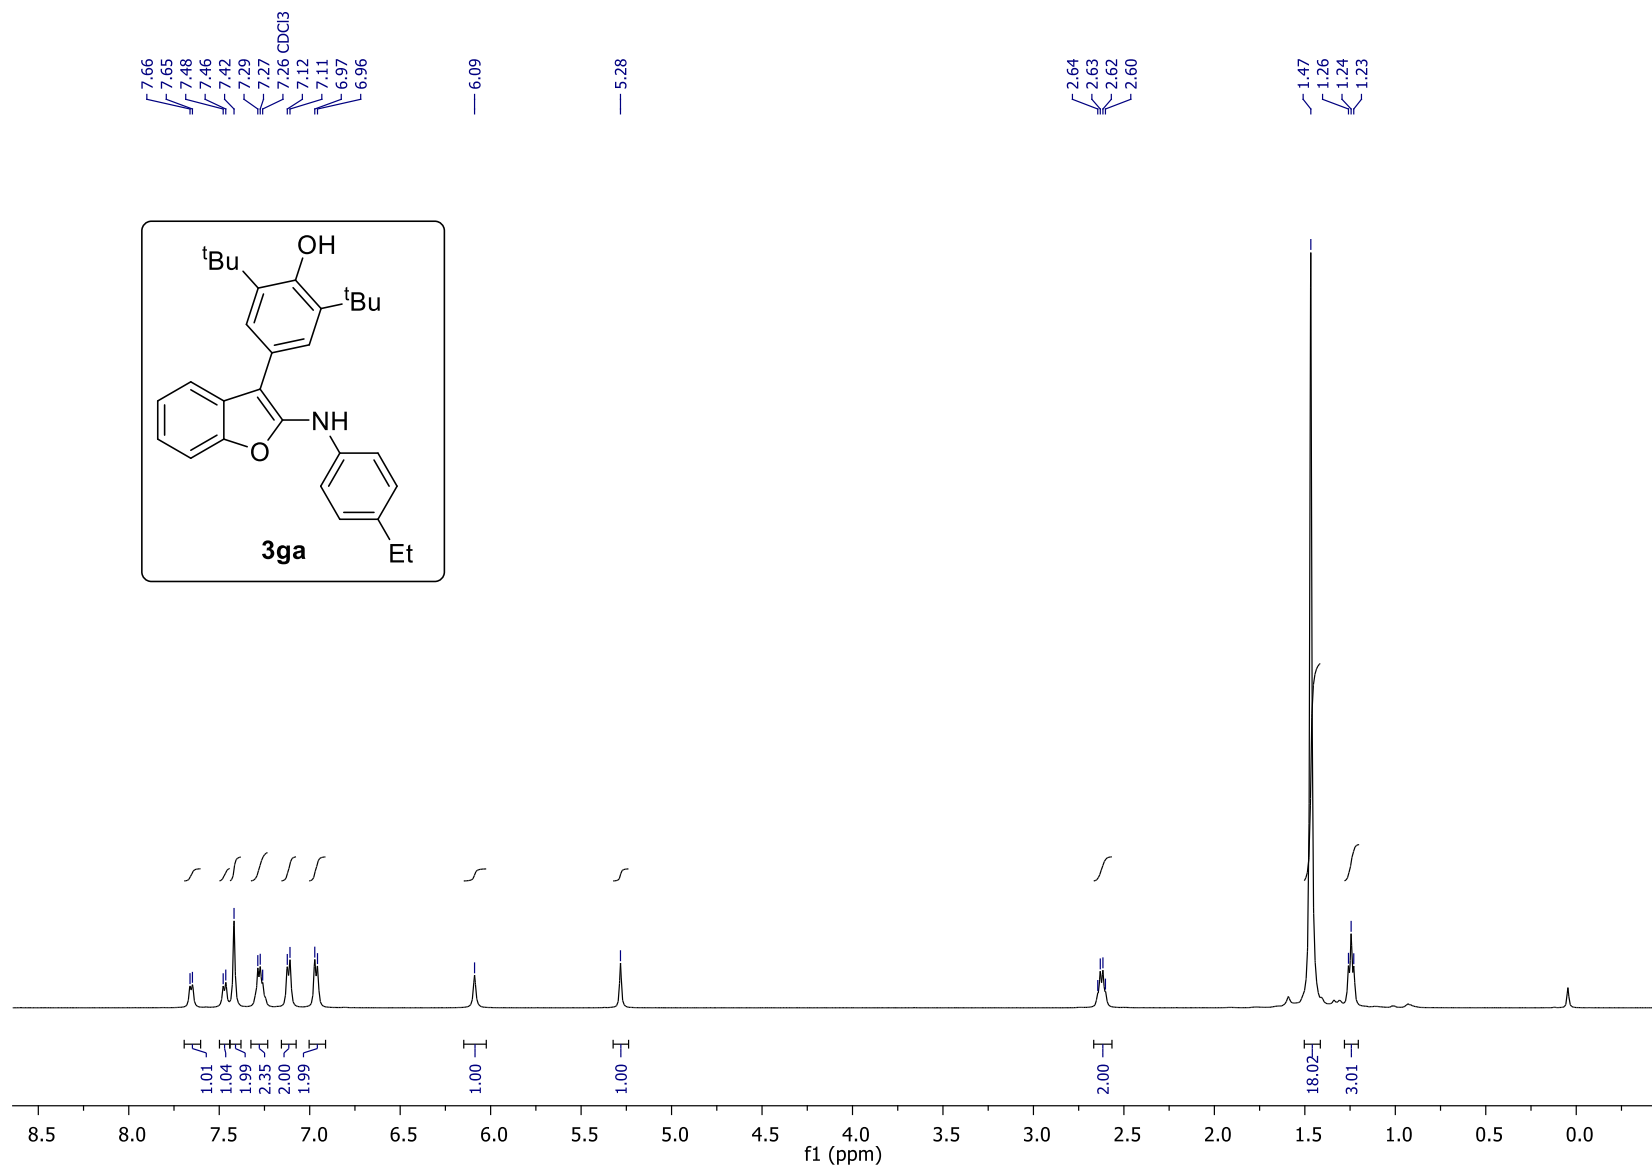

$^{13}\text{C}$  NMR of compound **3ga** in  $\text{CDCl}_3$

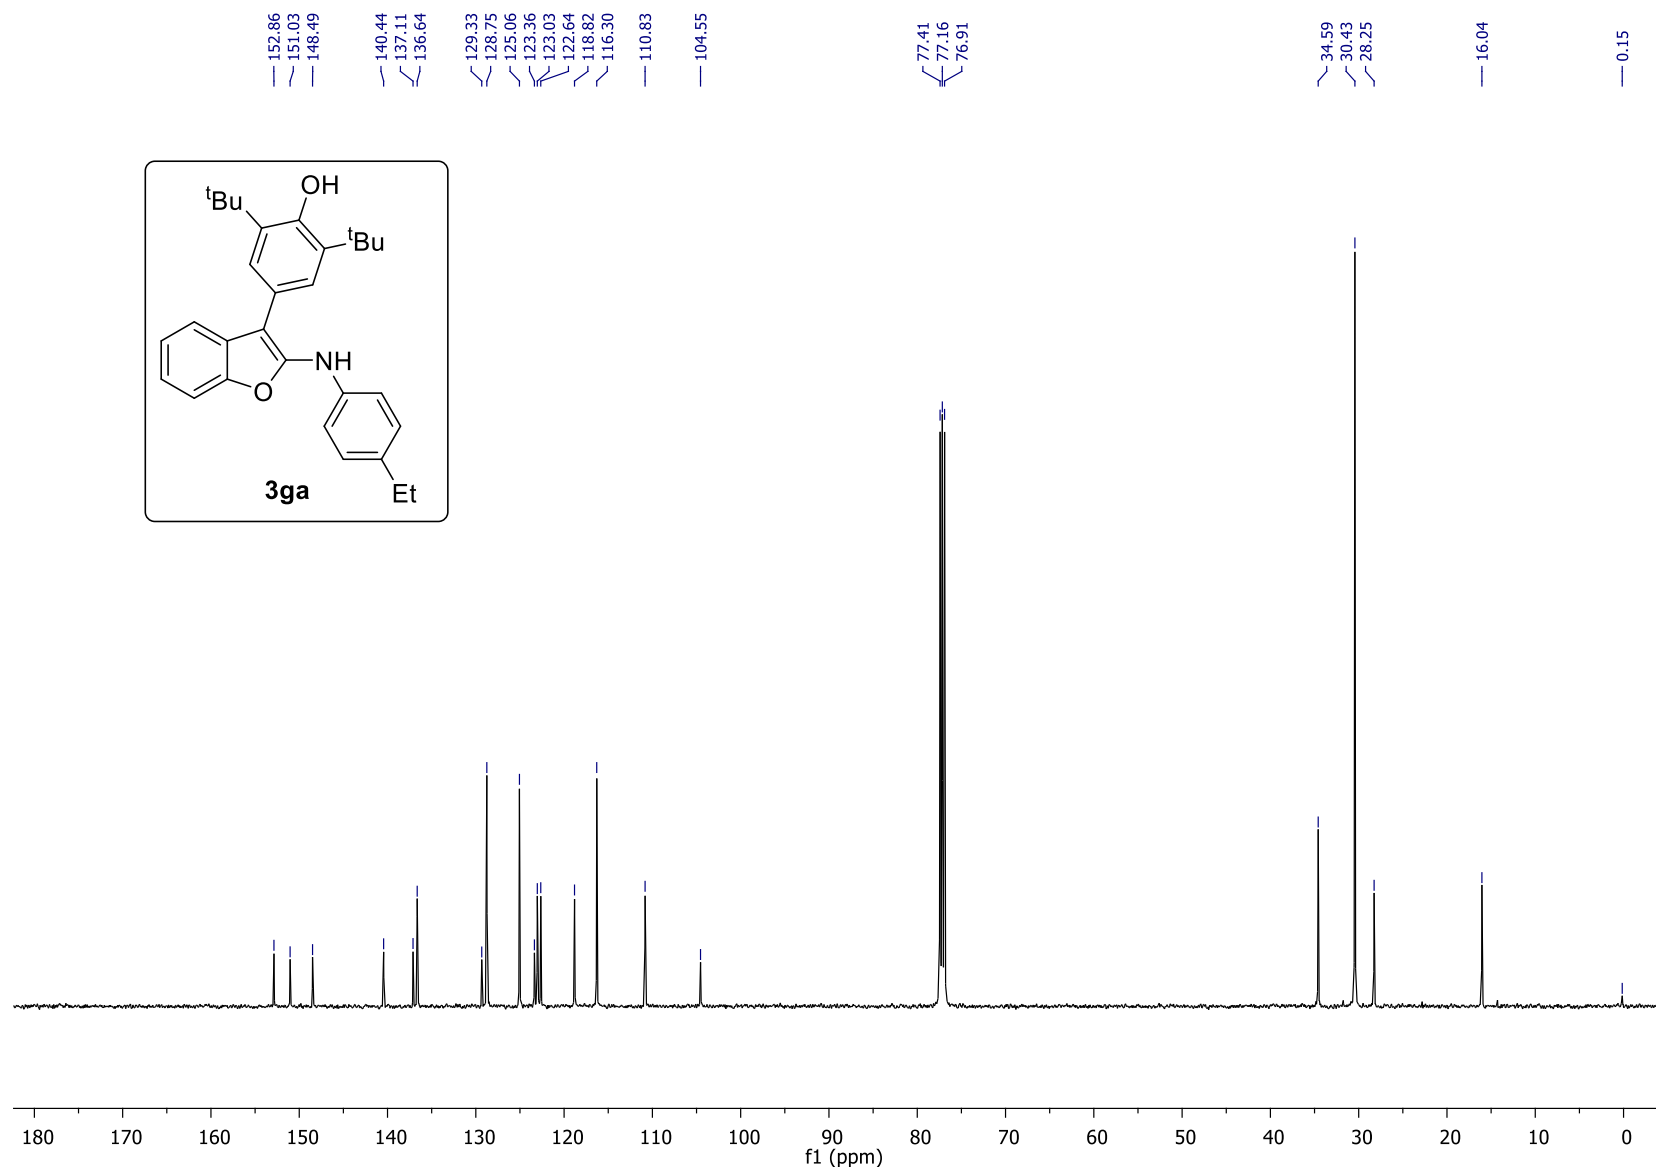

$^1\text{H}$  NMR of compound **3ha** in  $\text{CDCl}_3$

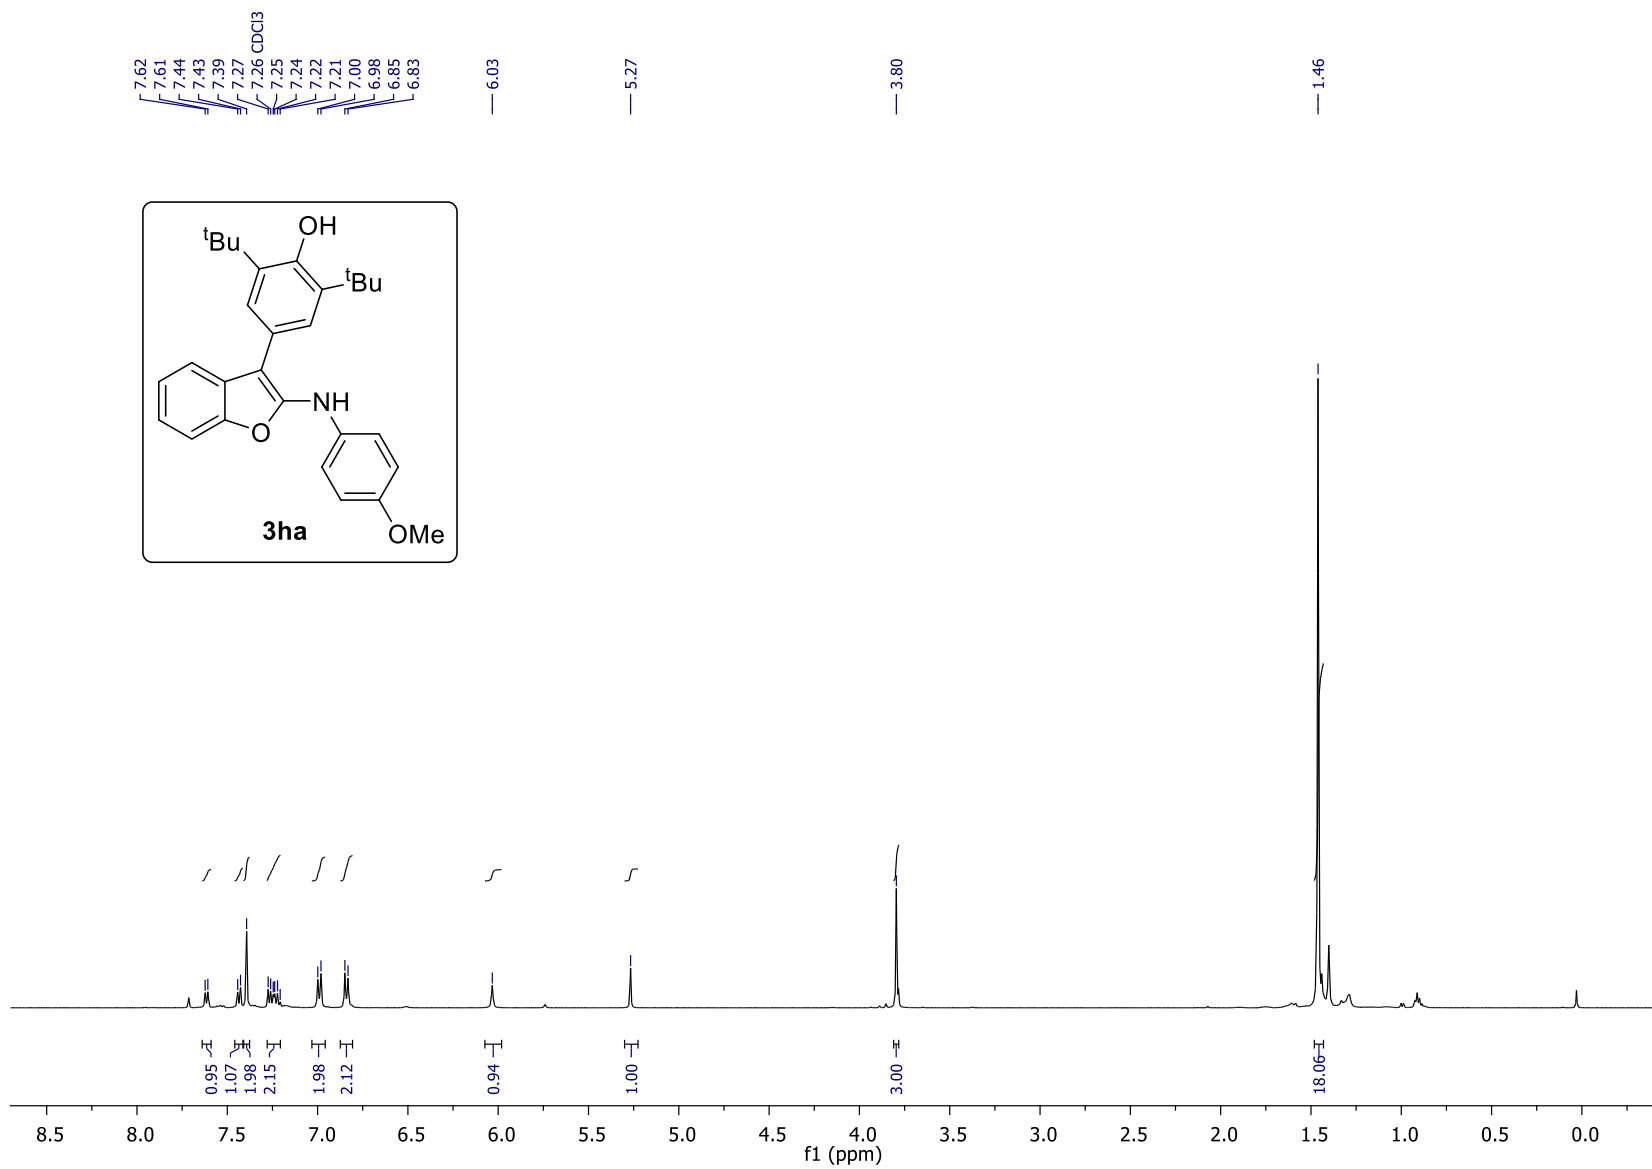

$^{13}\text{C}$  NMR of compound **3ha** in  $\text{CDCl}_3$

154.71  
152.80  
150.86  
149.07

136.65  
135.93

129.50  
127.96

125.00  
123.43

123.05  
122.37

118.57  
118.18

114.79  
110.70

103.18

77.41  
77.16  
76.91

55.80

34.58  
30.44

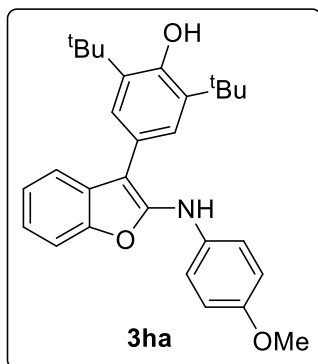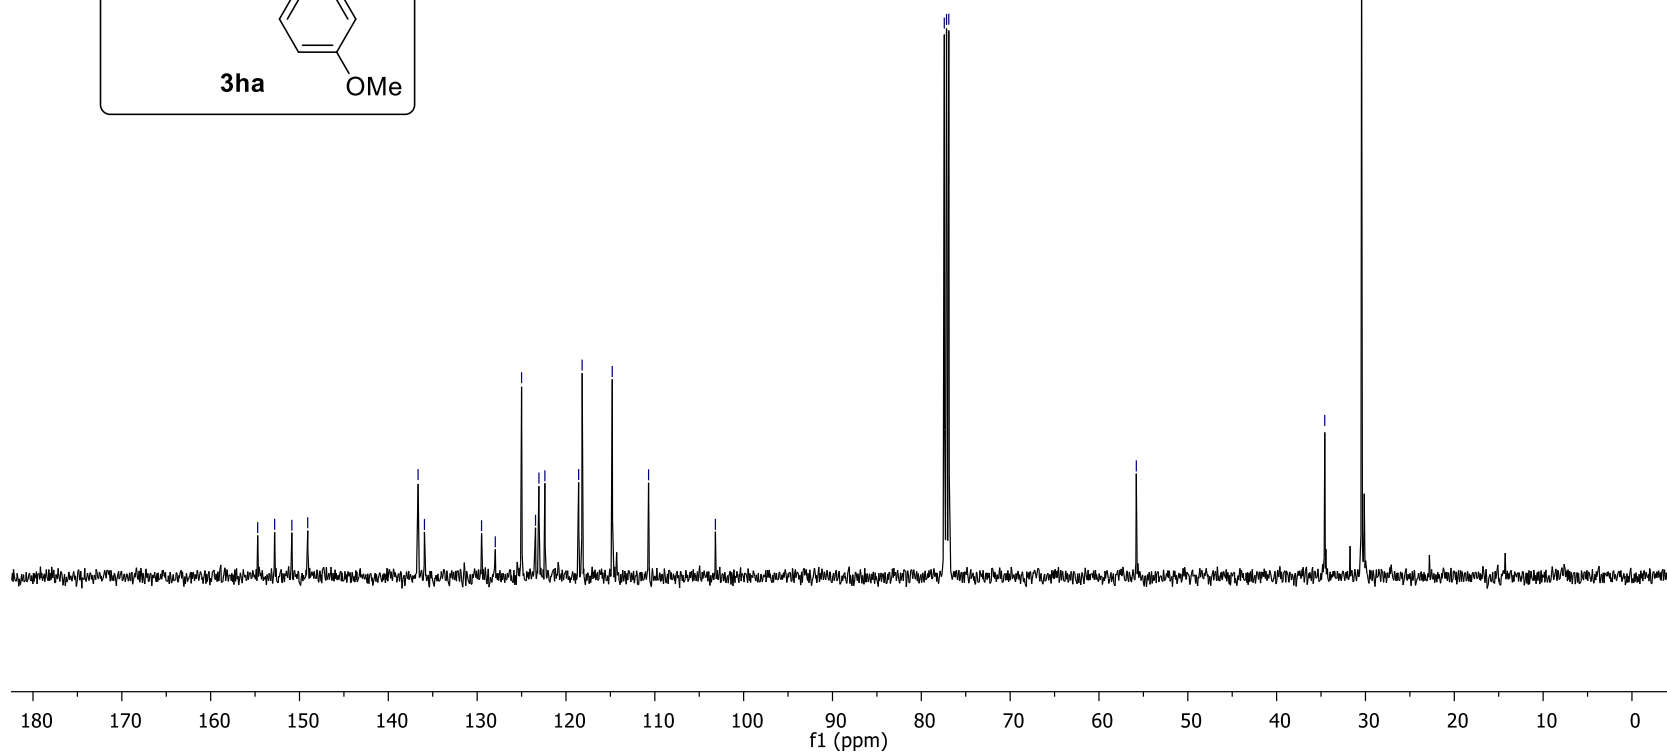

$^1\text{H}$  NMR of compound **3ia** in  $\text{CDCl}_3$

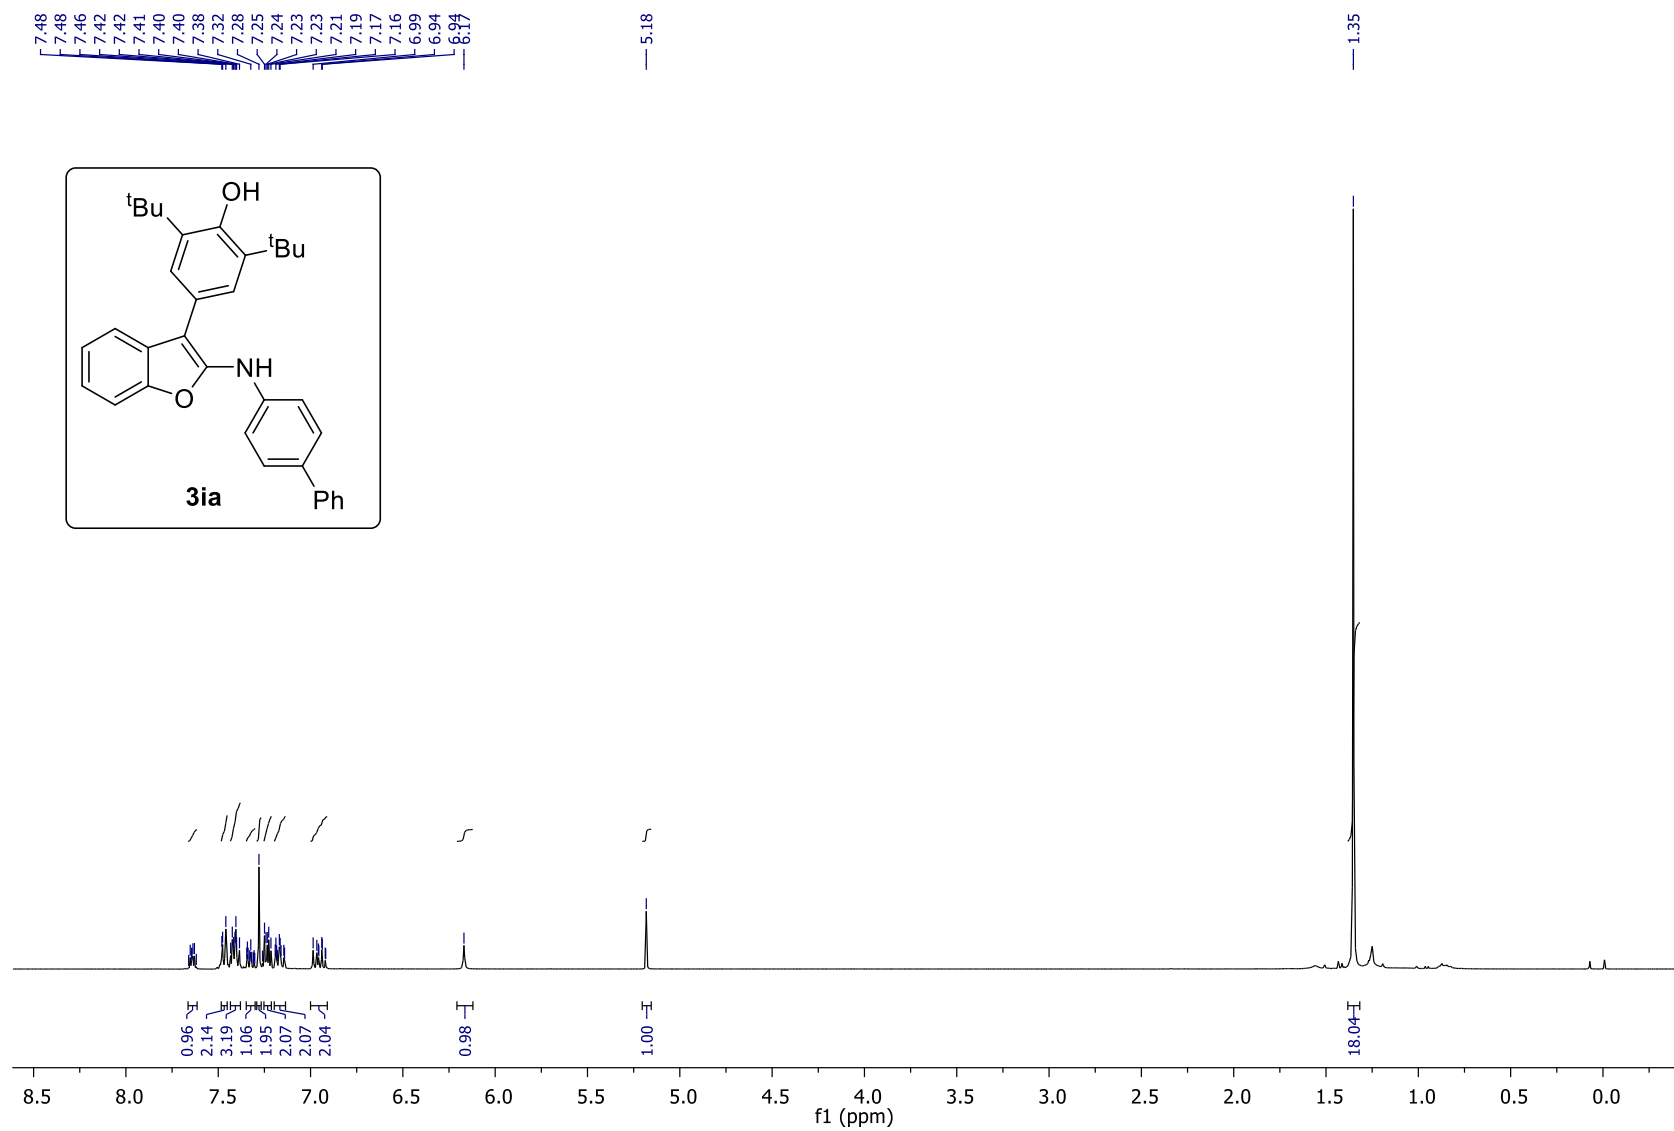

$^{13}\text{C}$  NMR of compound **3ia** in  $\text{CDCl}_3$

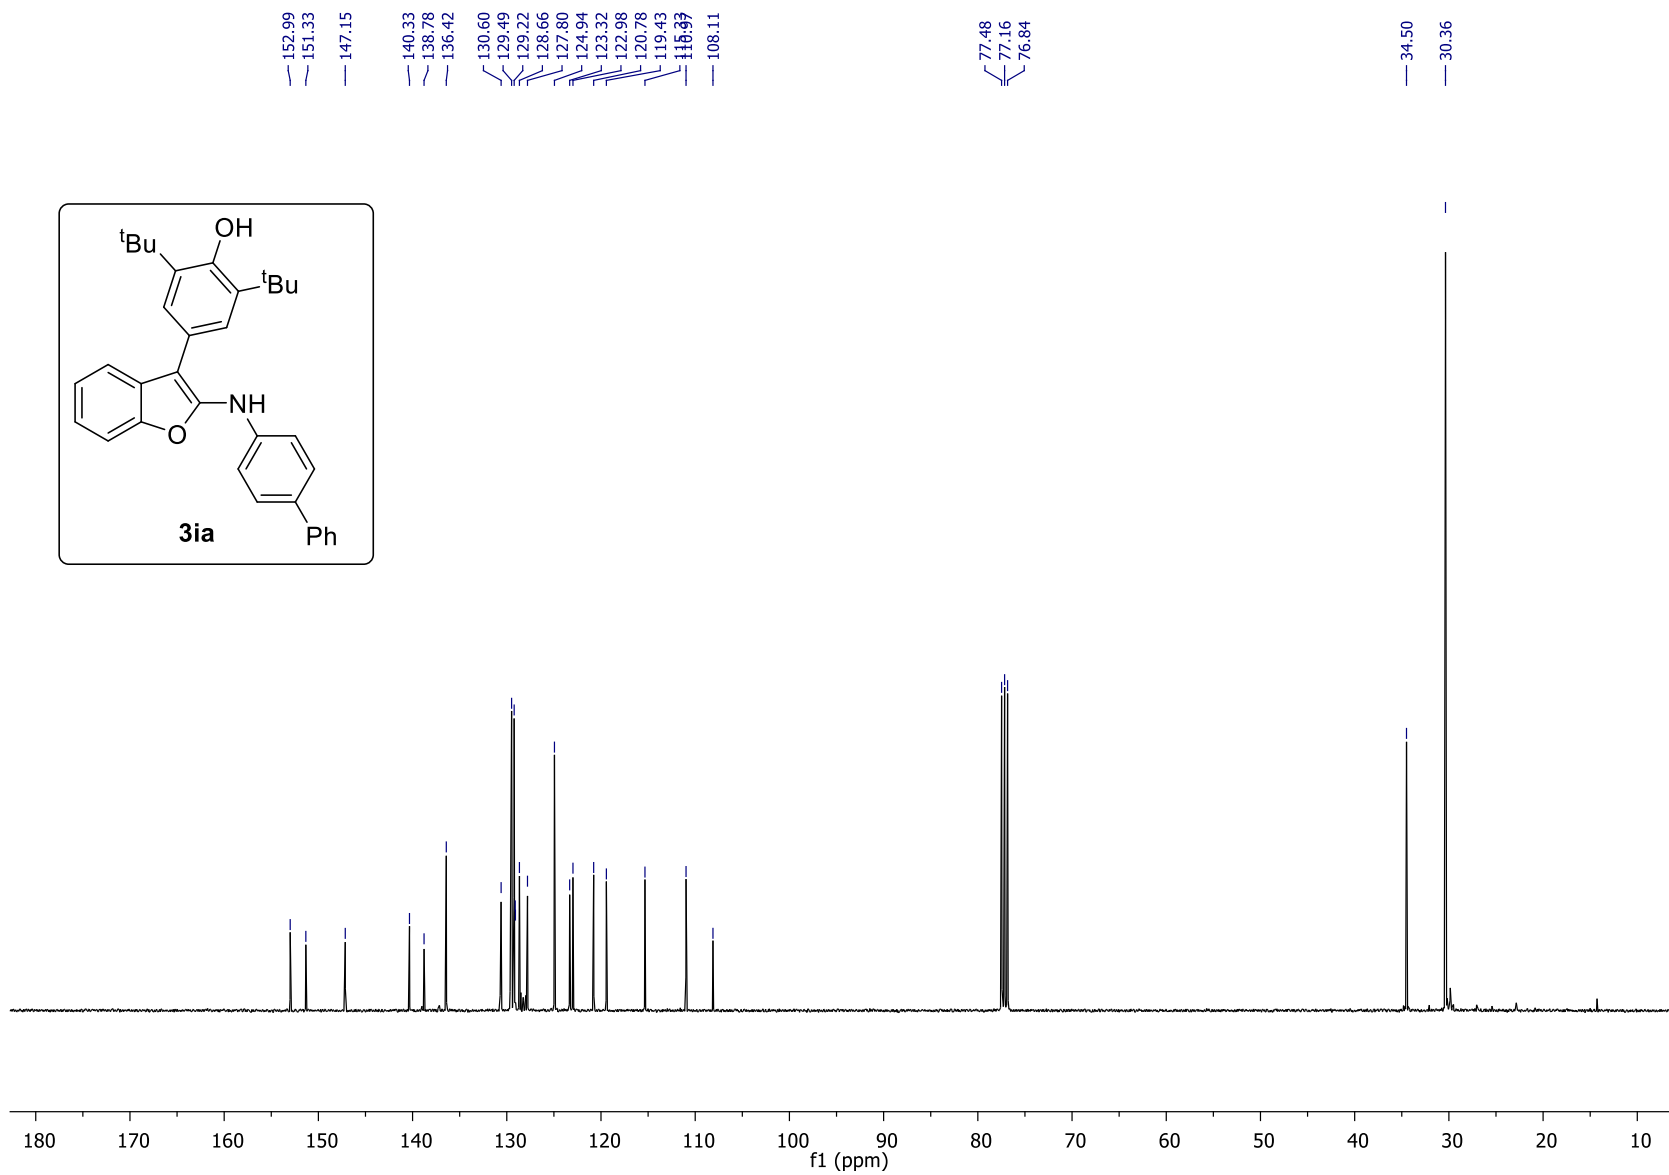

$^1\text{H}$  NMR of compound **3ja** in  $\text{CDCl}_3$

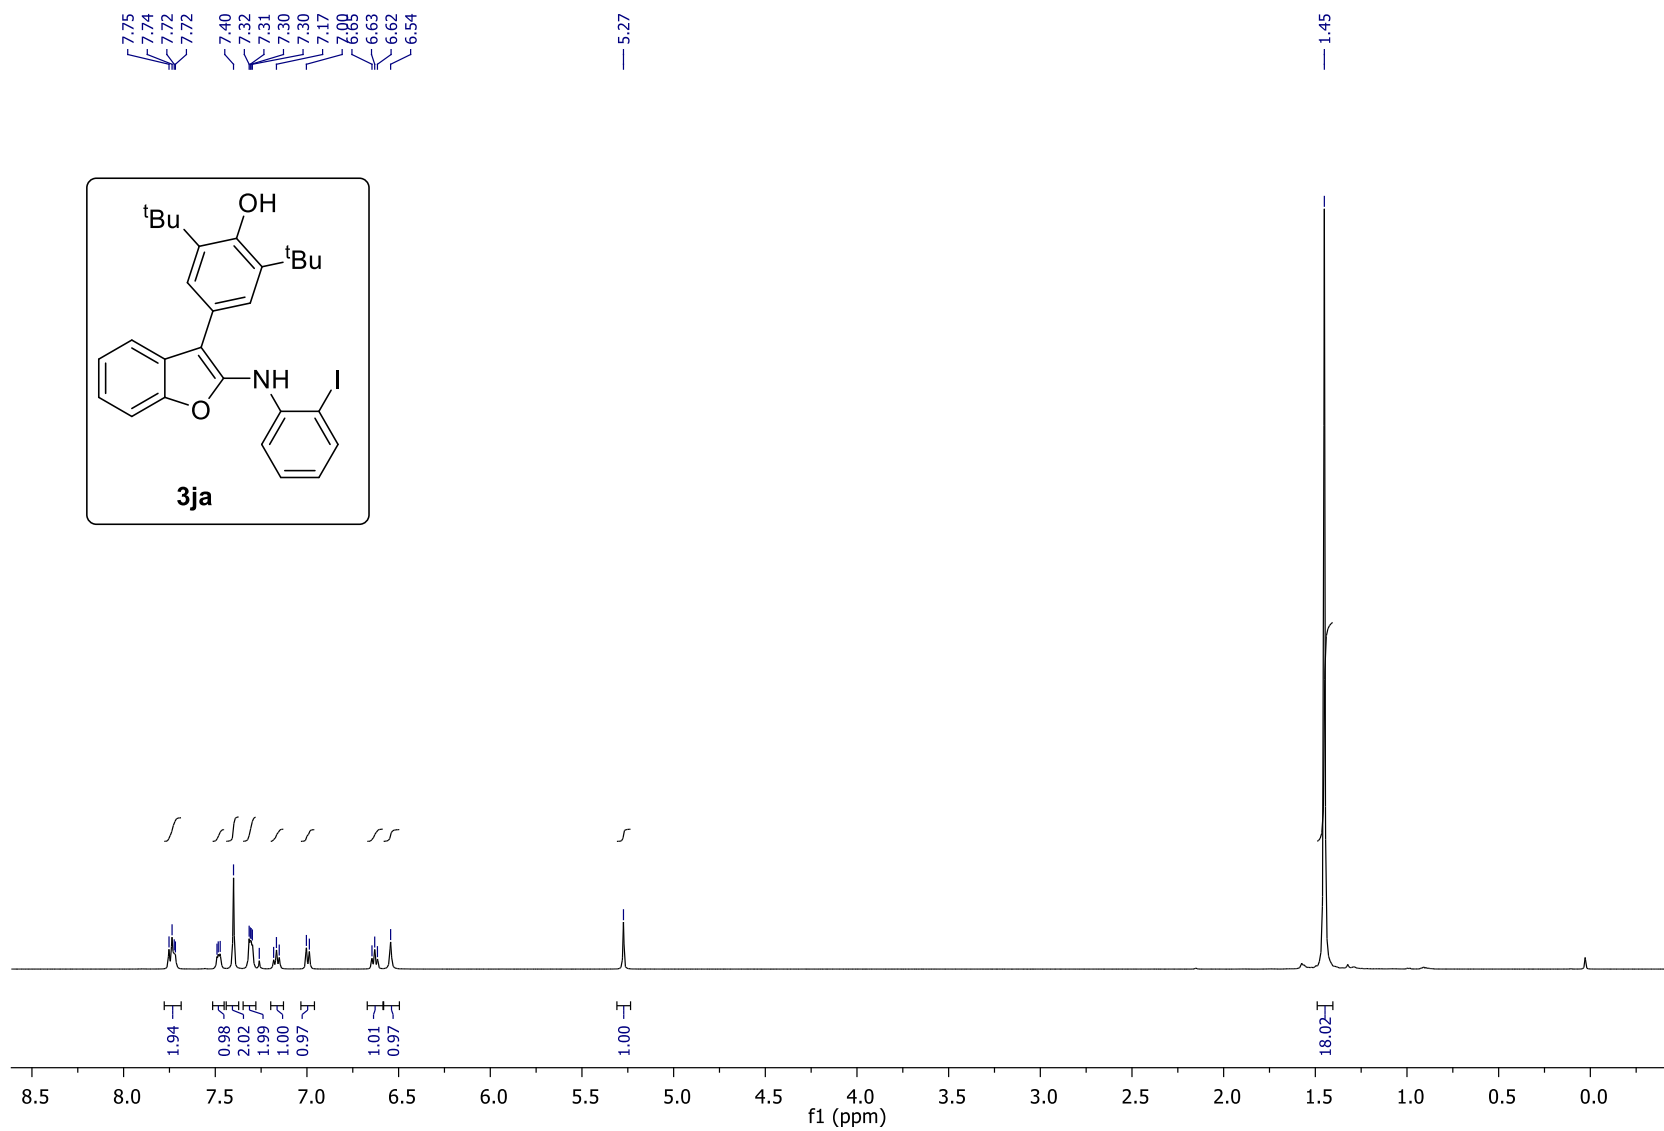

$^{13}\text{C}$  NMR of compound **3ja** in  $\text{CDCl}_3$

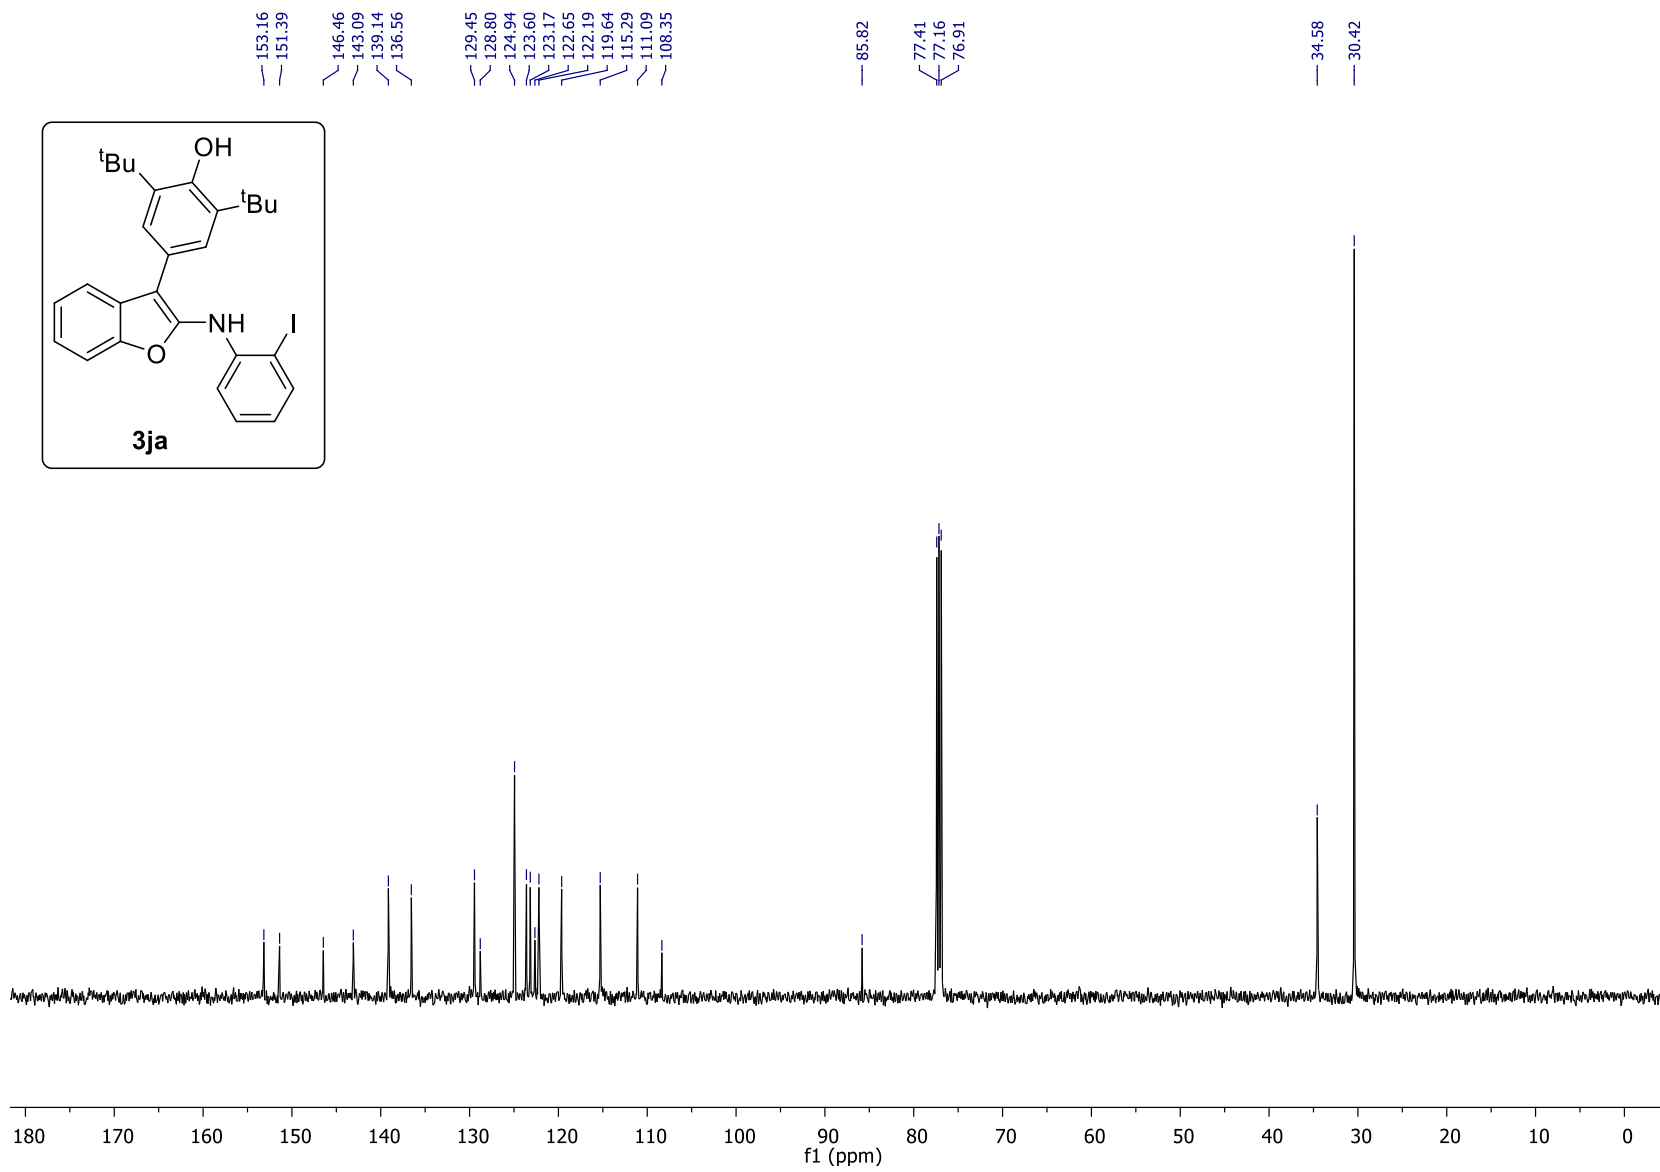



$^1\text{H}$  NMR of compound **3ka** in  $\text{CDCl}_3$

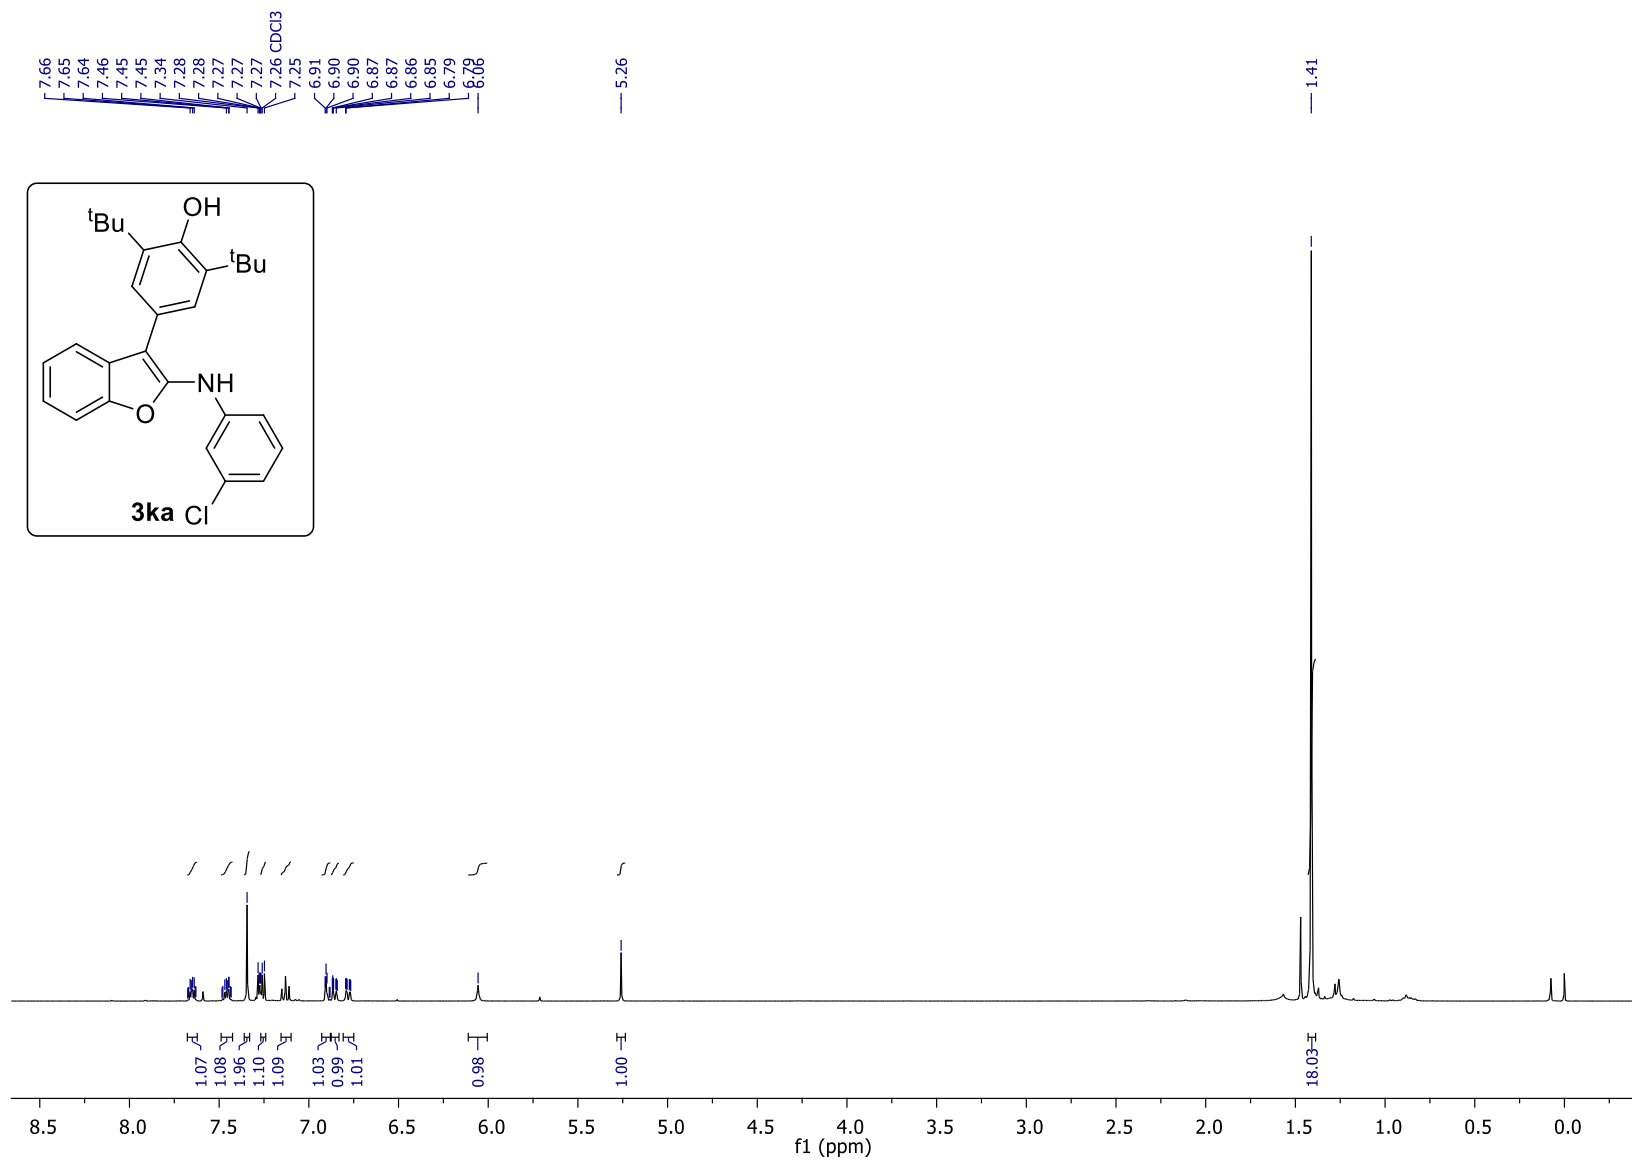

$^{13}\text{C}$  NMR of compound **3ka** in  $\text{CDCl}_3$

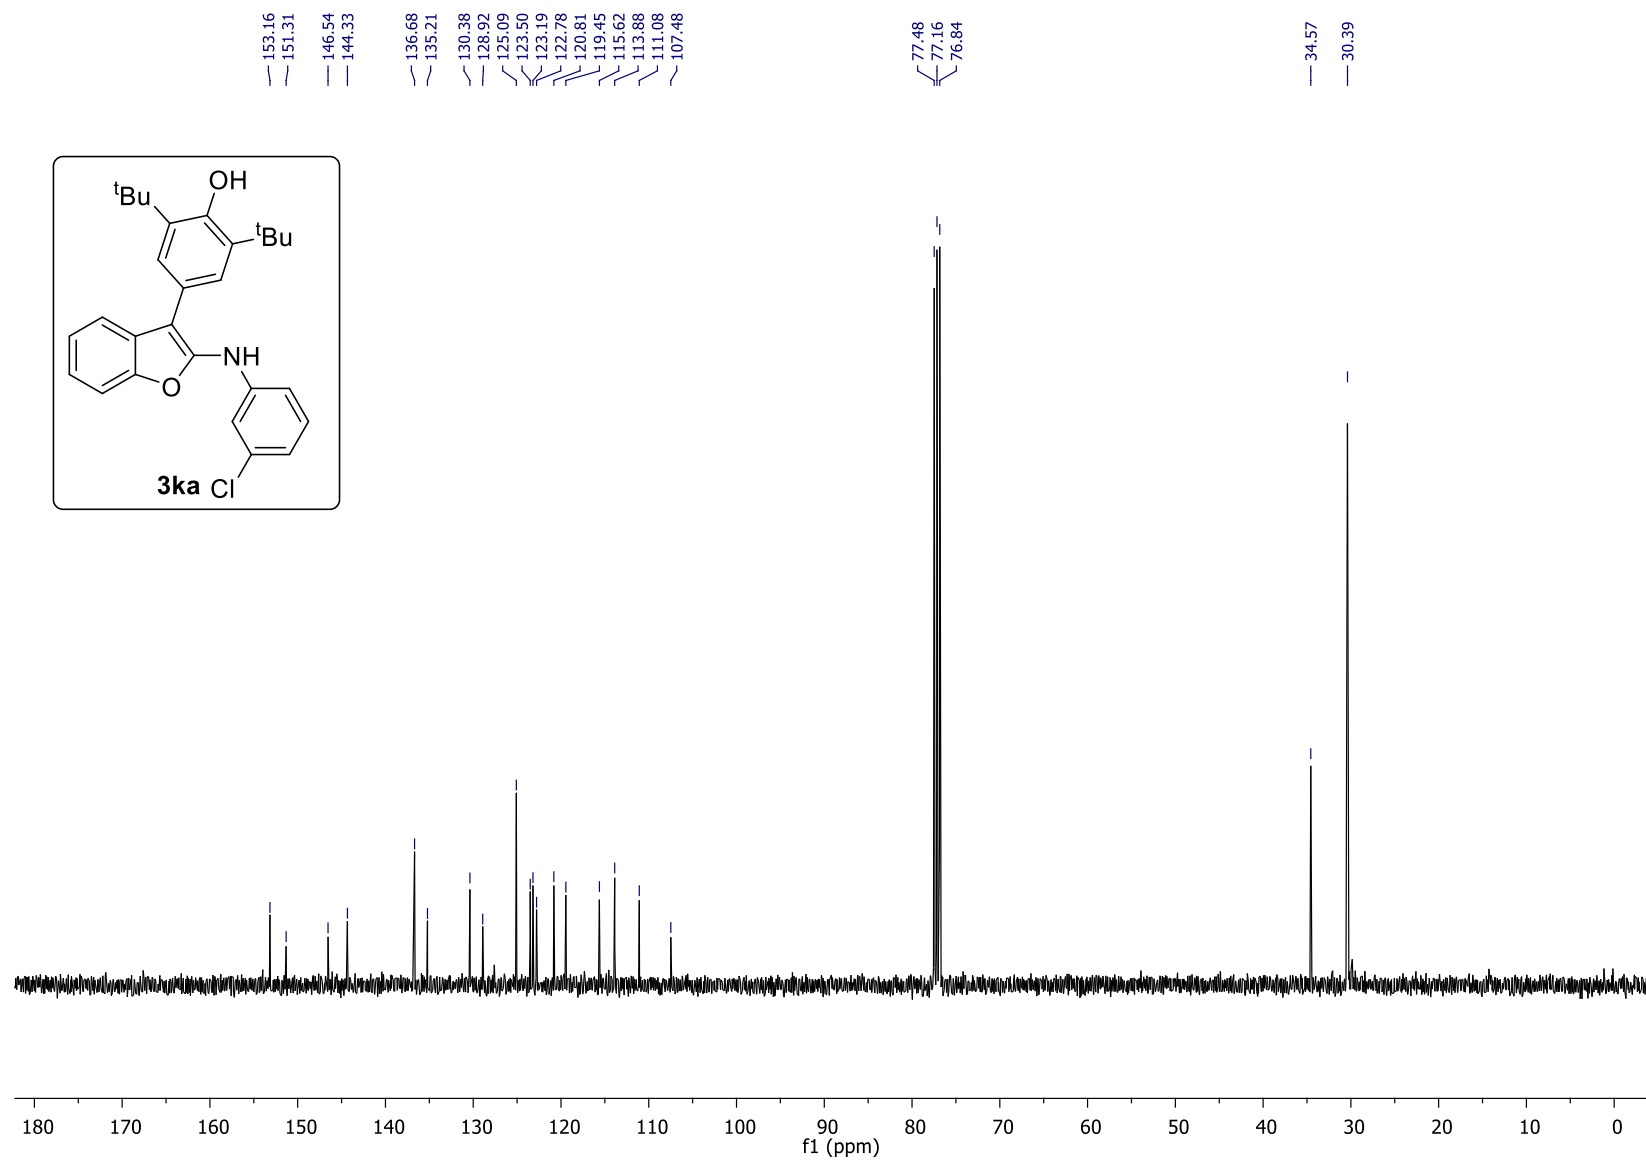

$^1\text{H}$  NMR of compound **3la** in  $\text{CDCl}_3$

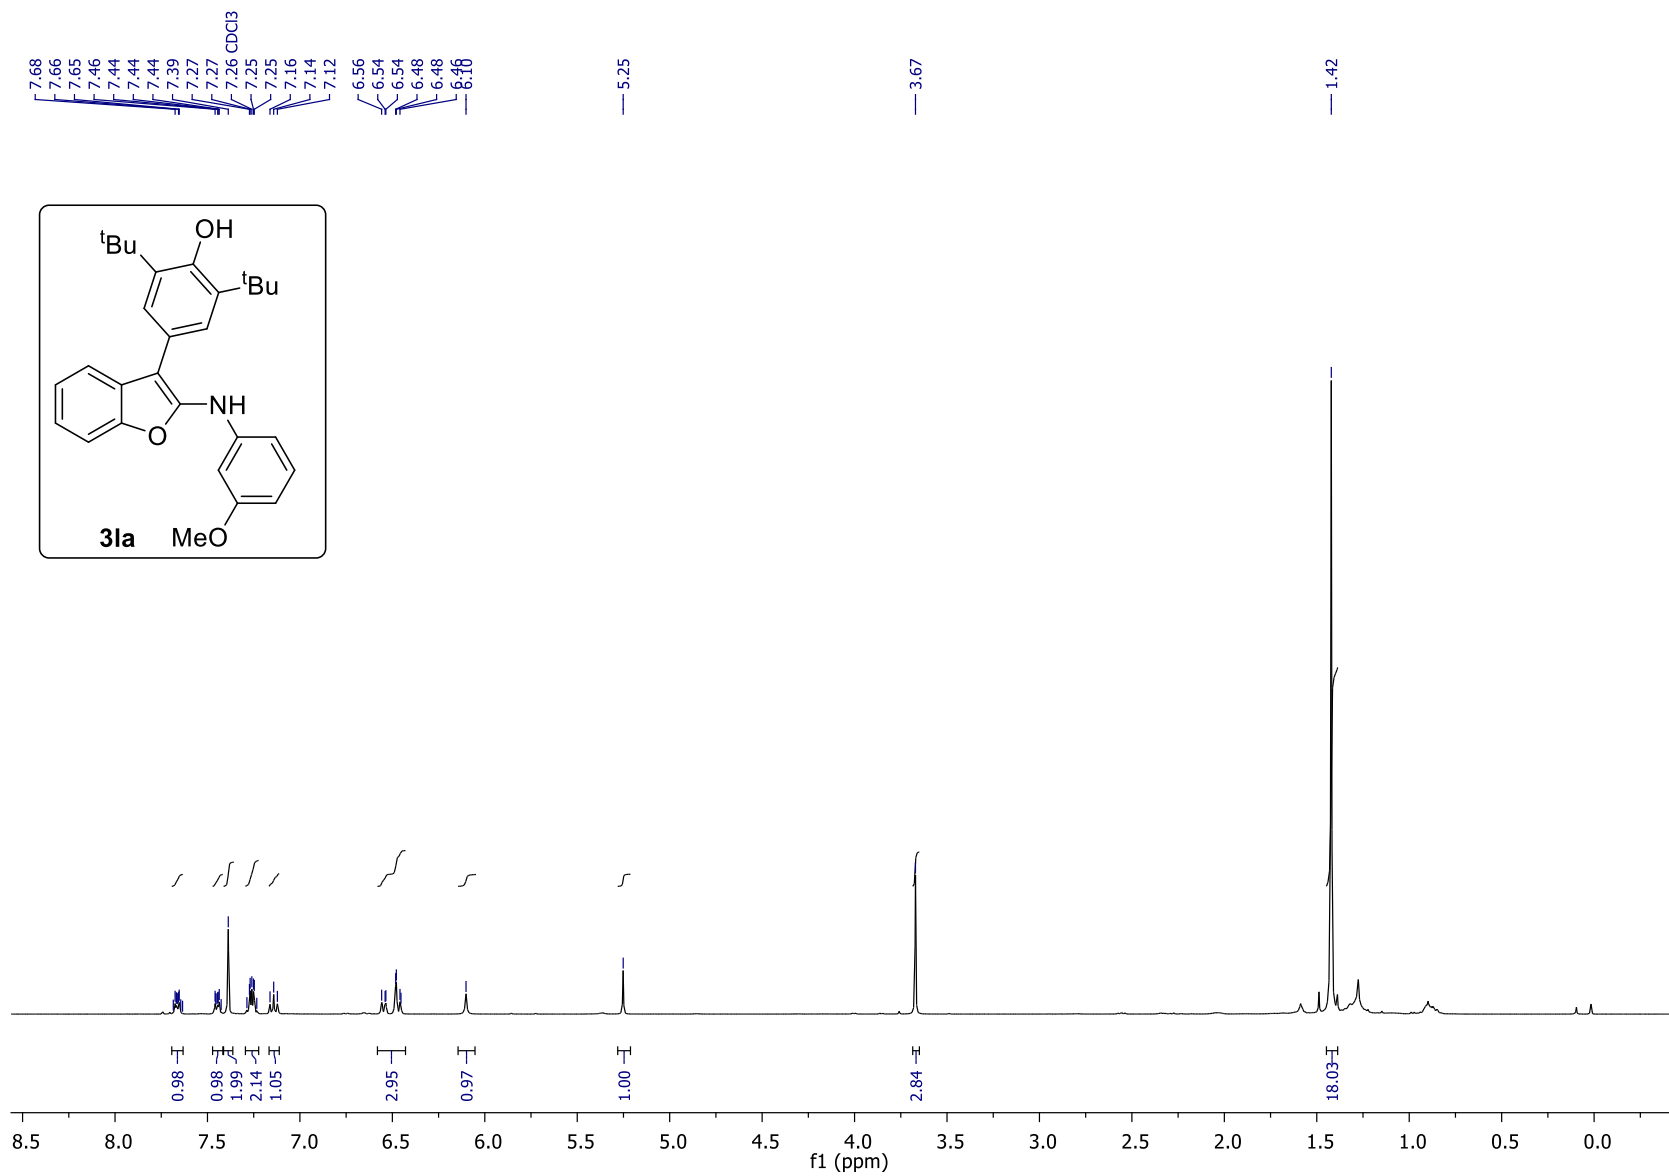

$^{13}\text{C}$  NMR of compound **3la** in  $\text{CDCl}_3$

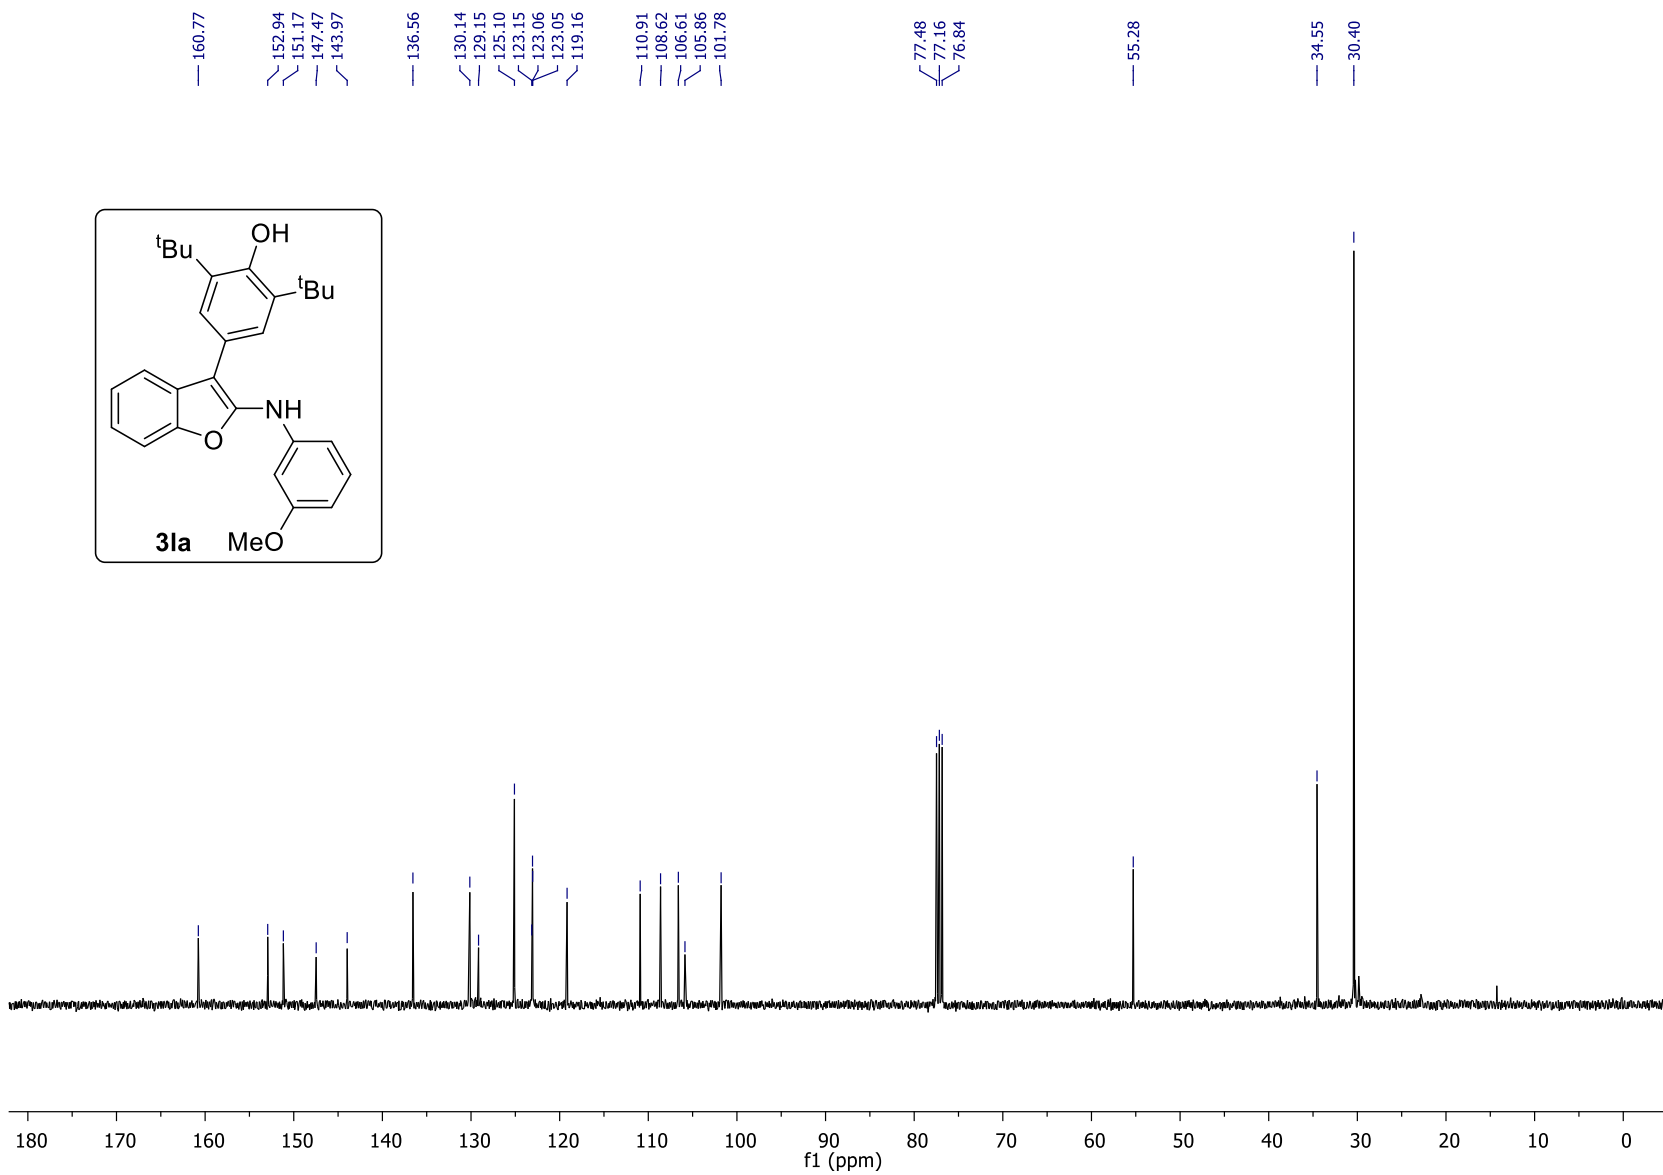

$^1\text{H}$  NMR of compound **3ma** in  $\text{CDCl}_3$

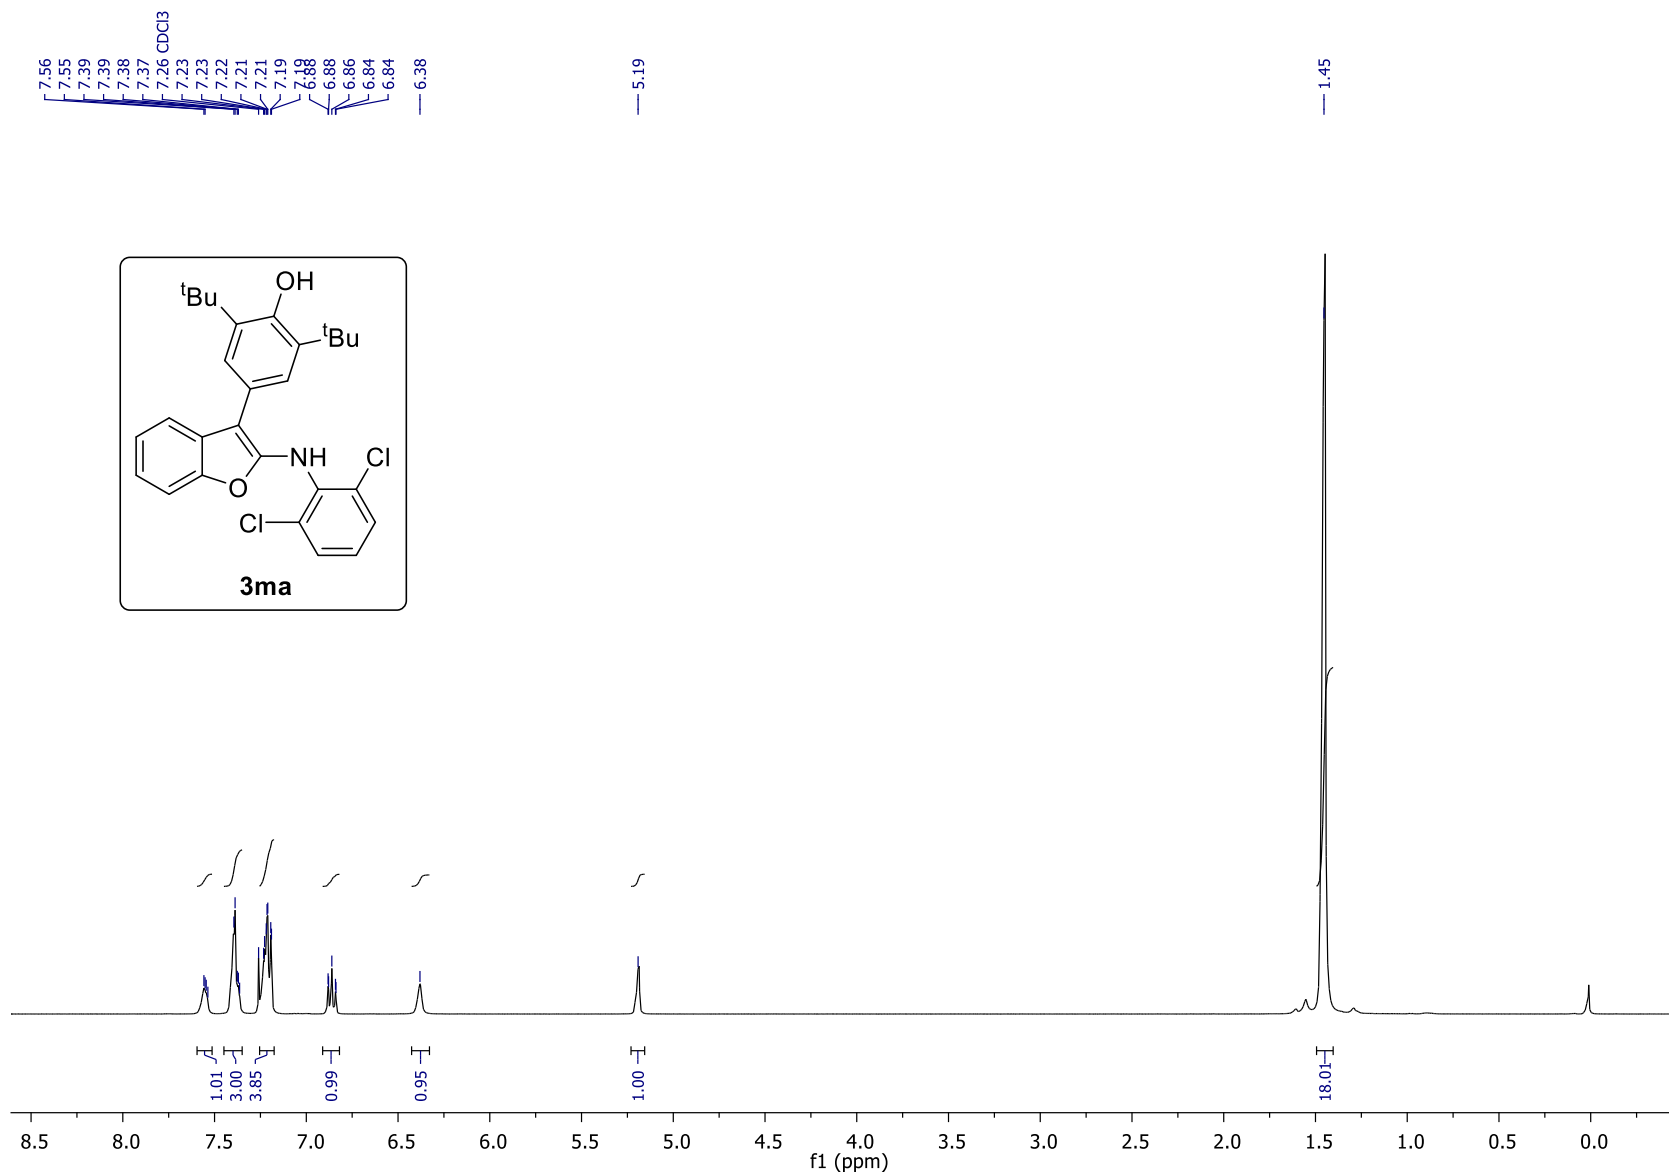

$^{13}\text{C}$  NMR of compound **3ma** in  $\text{CDCl}_3$

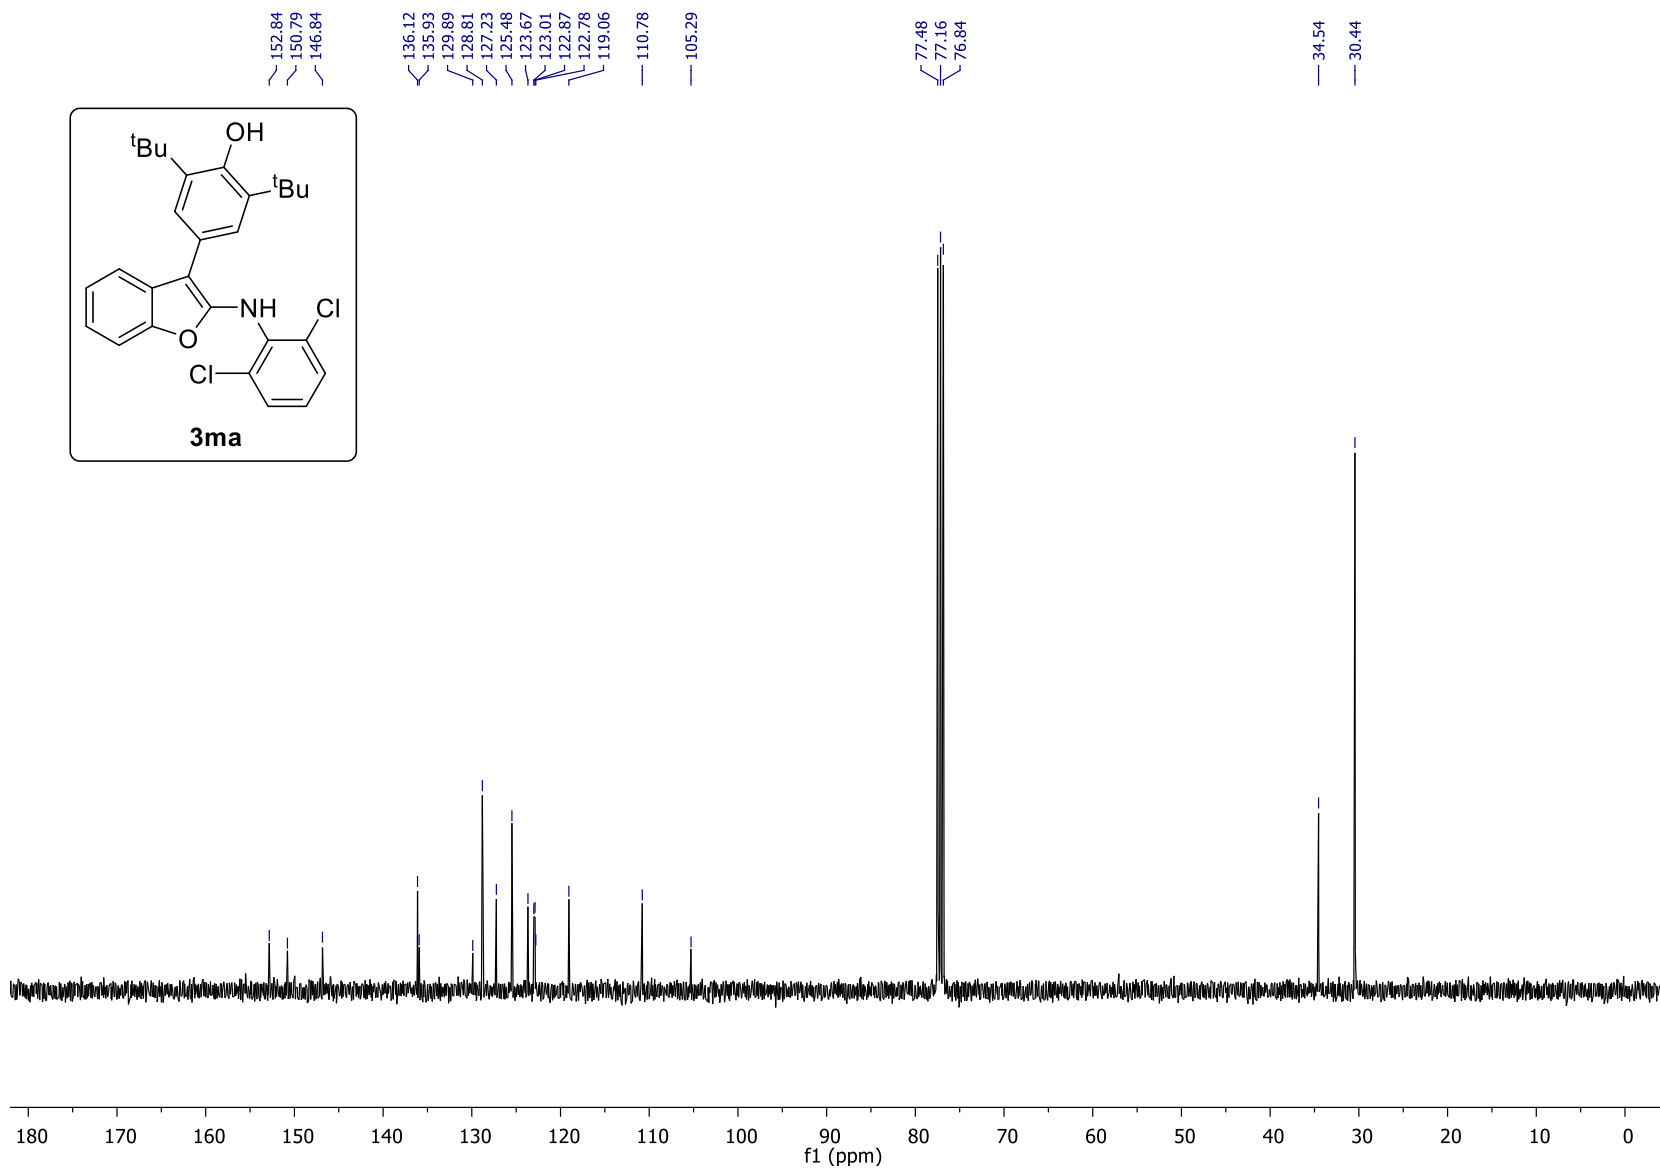

$^1\text{H}$  NMR of compound **3na** in  $\text{CDCl}_3$

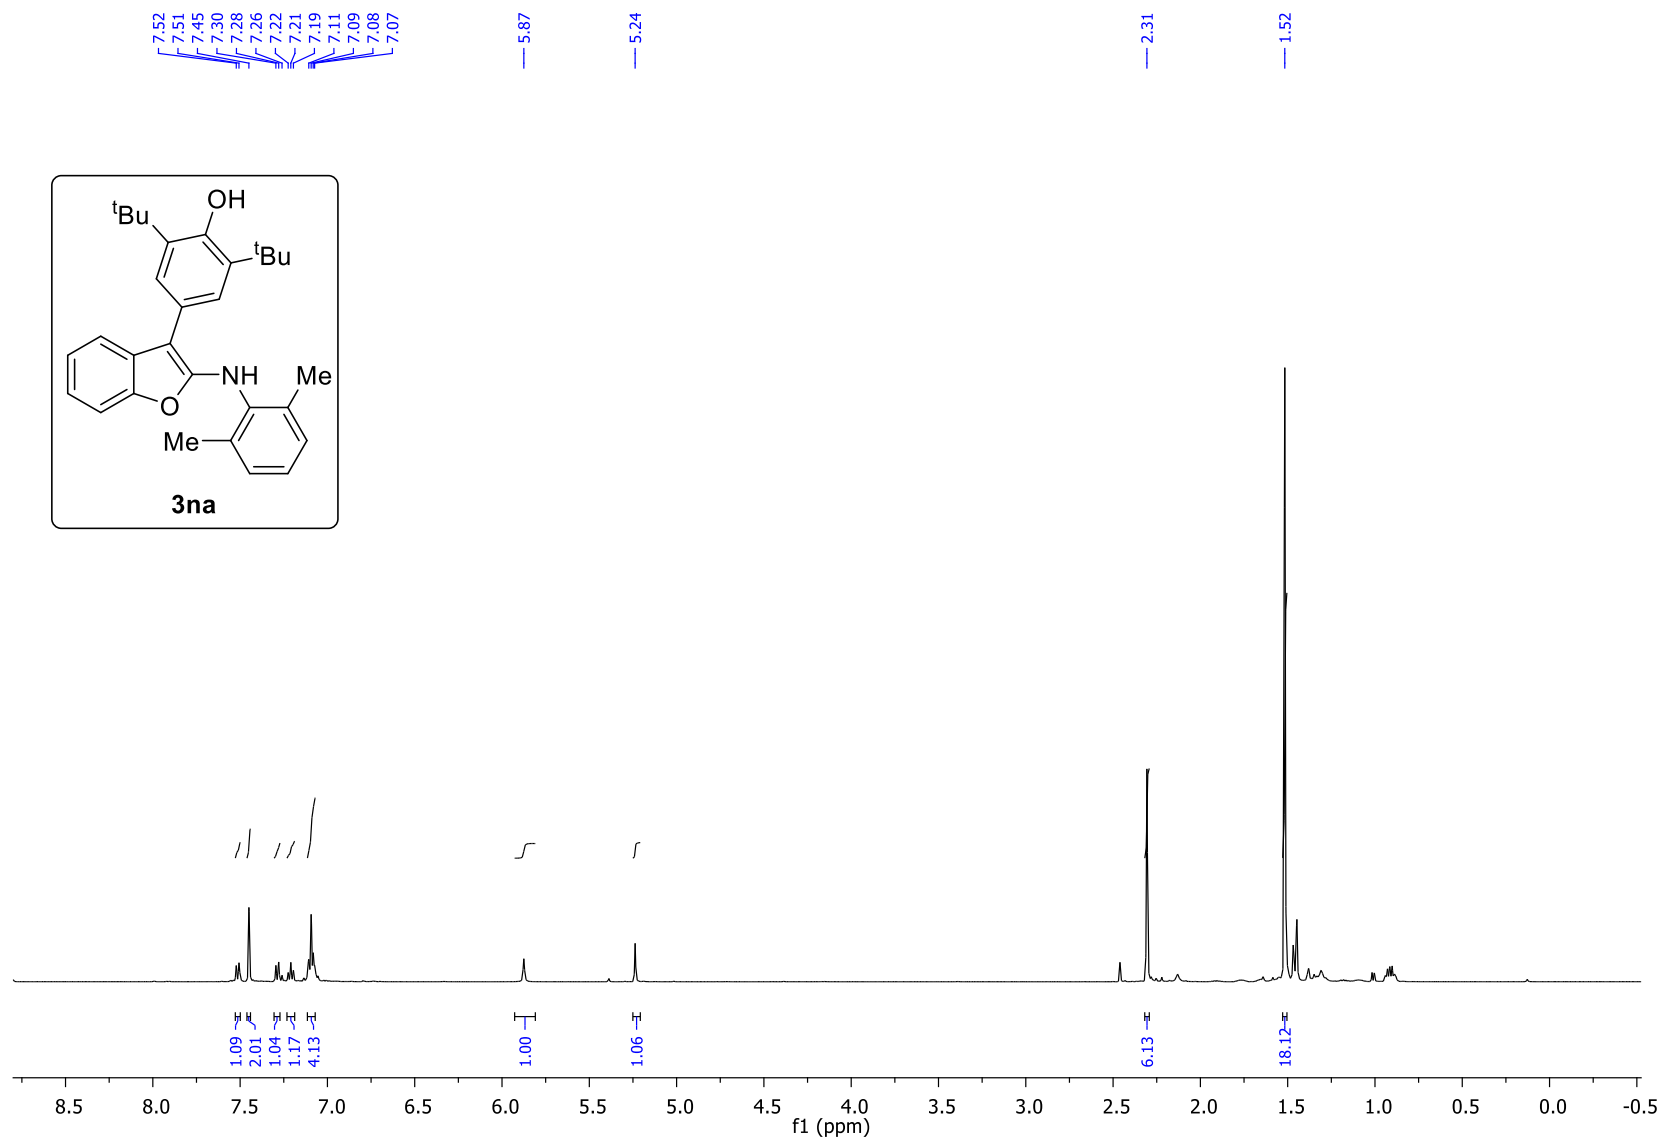

$^{13}\text{C}$  NMR of compound **3na** in  $\text{CDCl}_3$

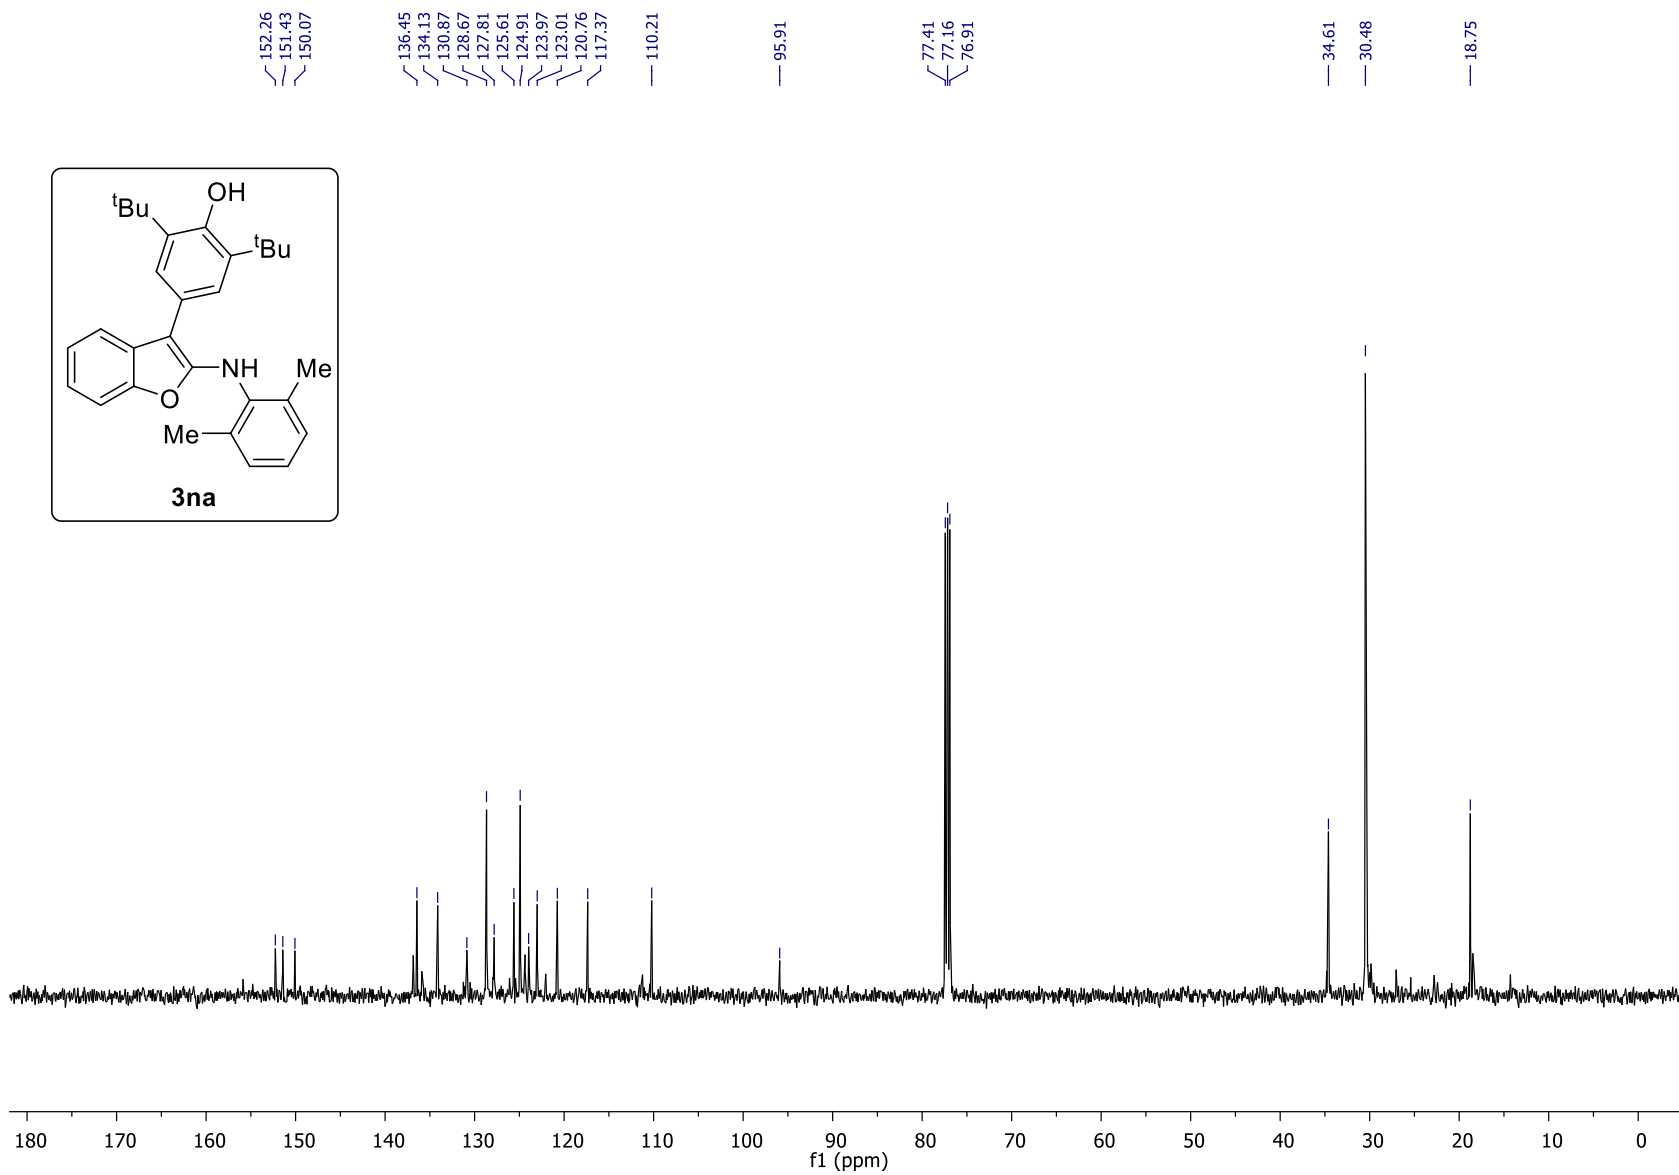



$^1\text{H}$  NMR of compound **30a** in  $\text{CDCl}_3$

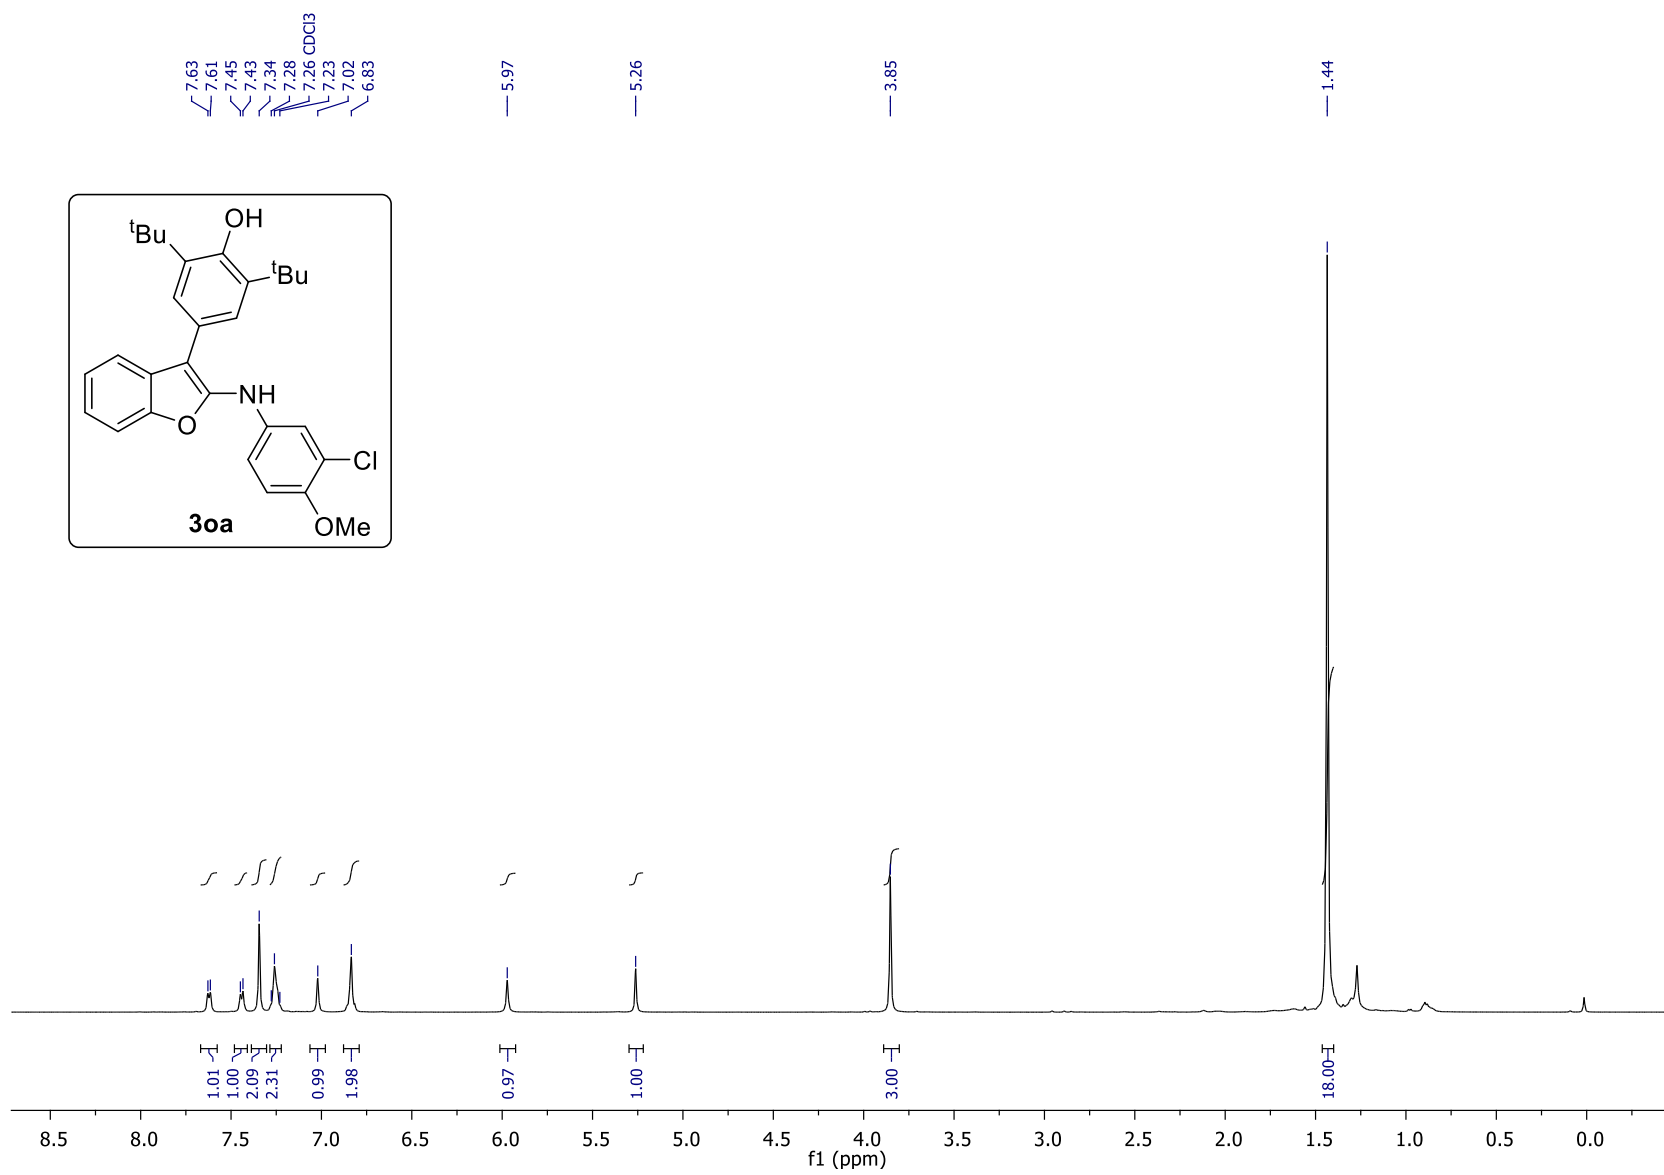

$^{13}\text{C}$  NMR of compound **3oa** in  $\text{CDCl}_3$

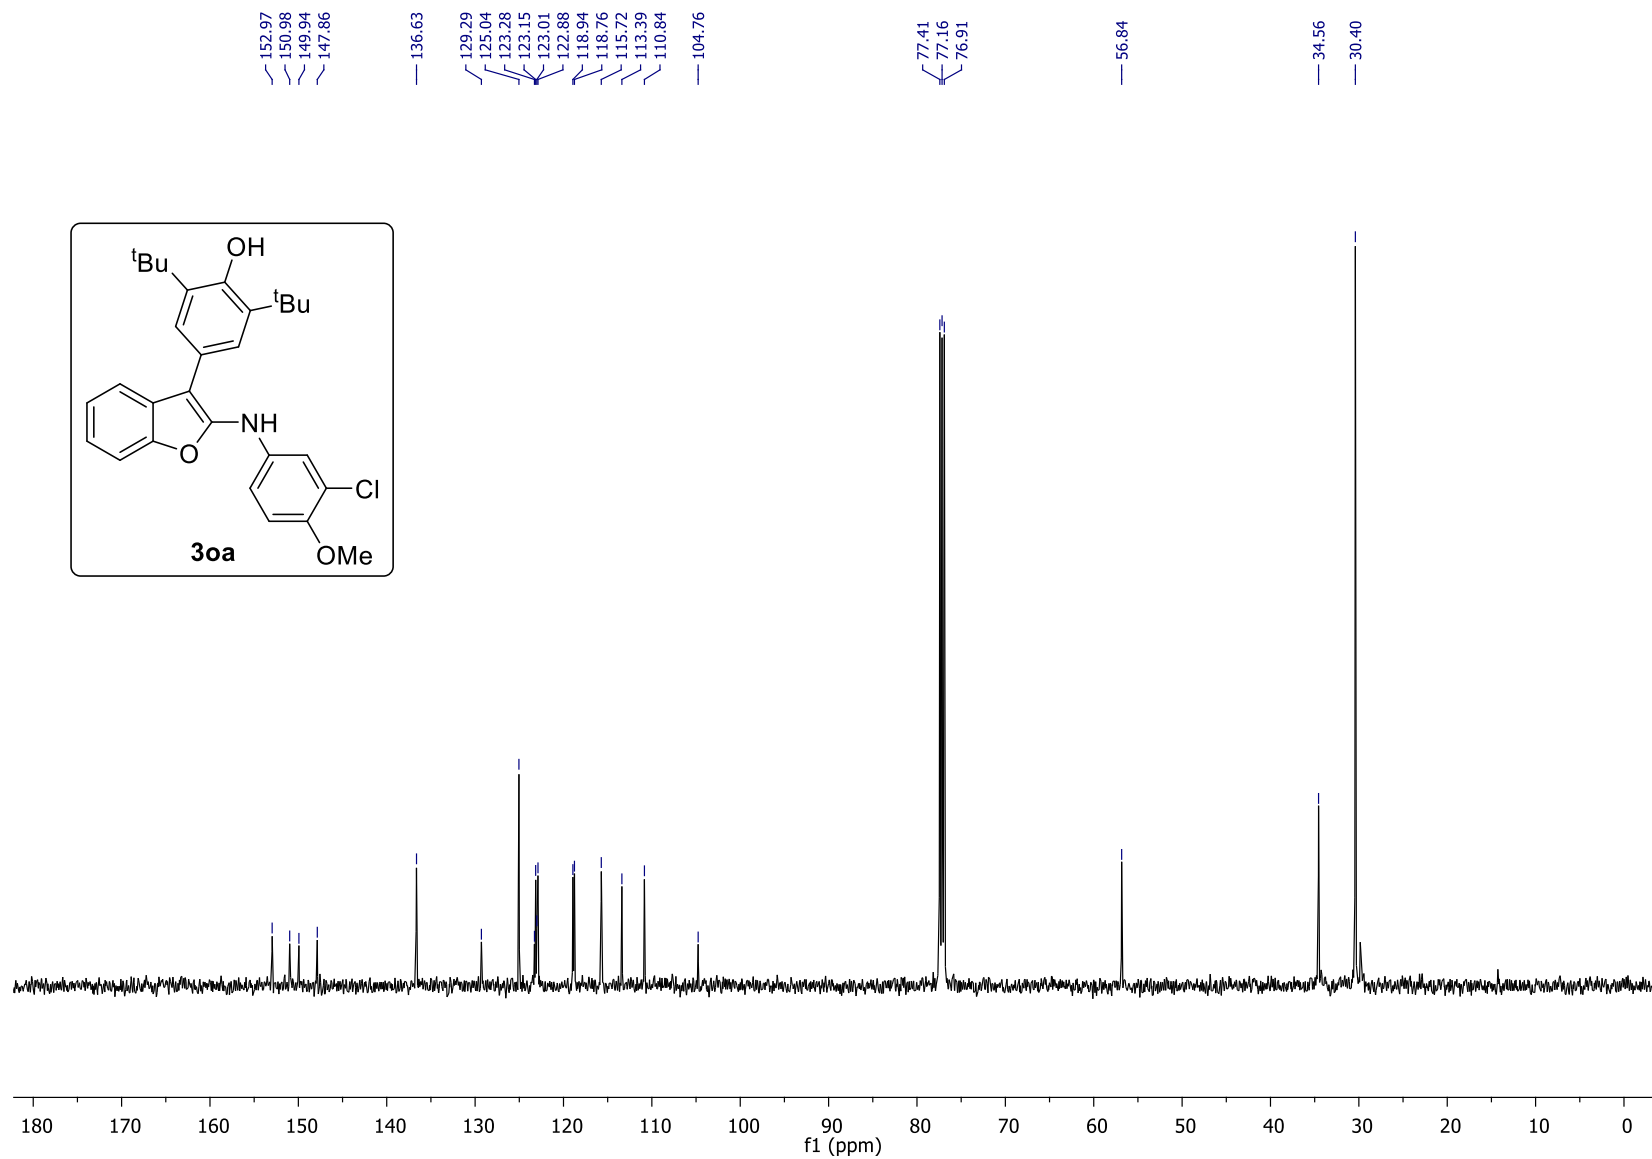

$^1\text{H}$  NMR of compound **3pa** in  $\text{CDCl}_3$

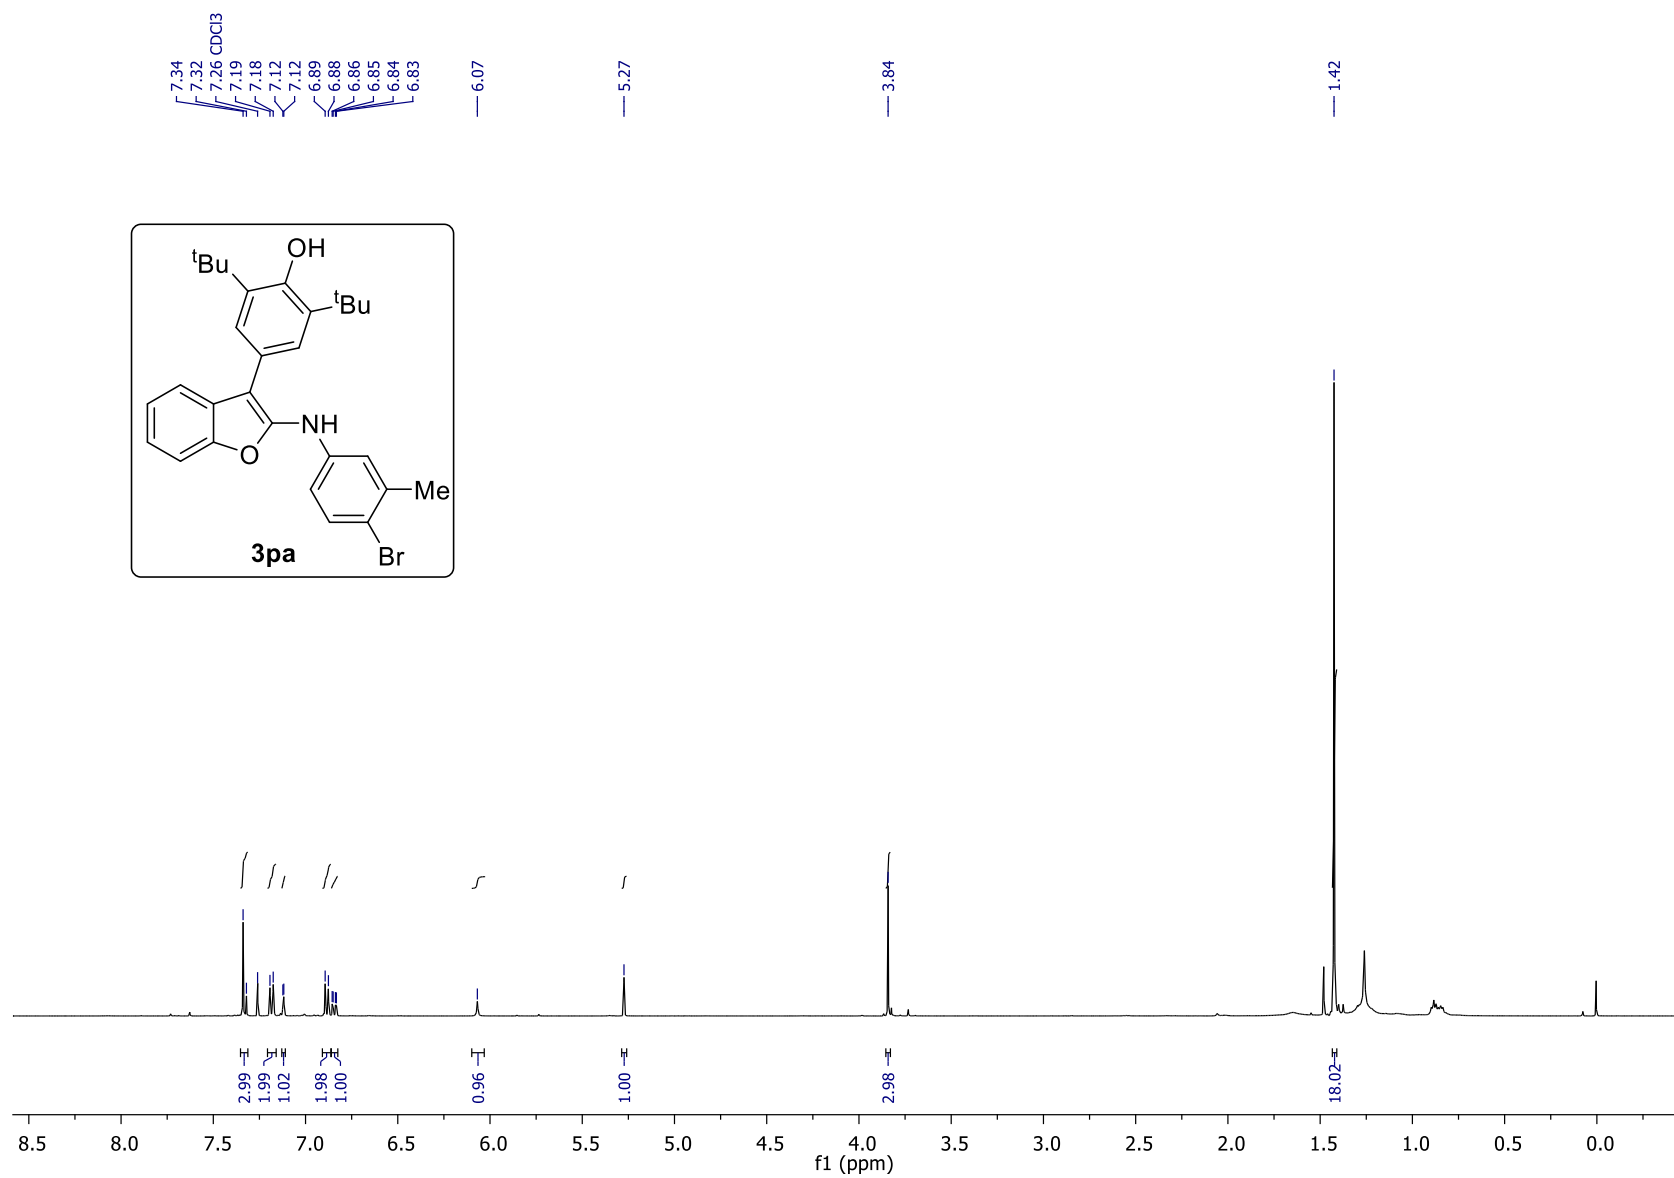

$^{13}\text{C}$  NMR of compound **3pa** in  $\text{CDCl}_3$

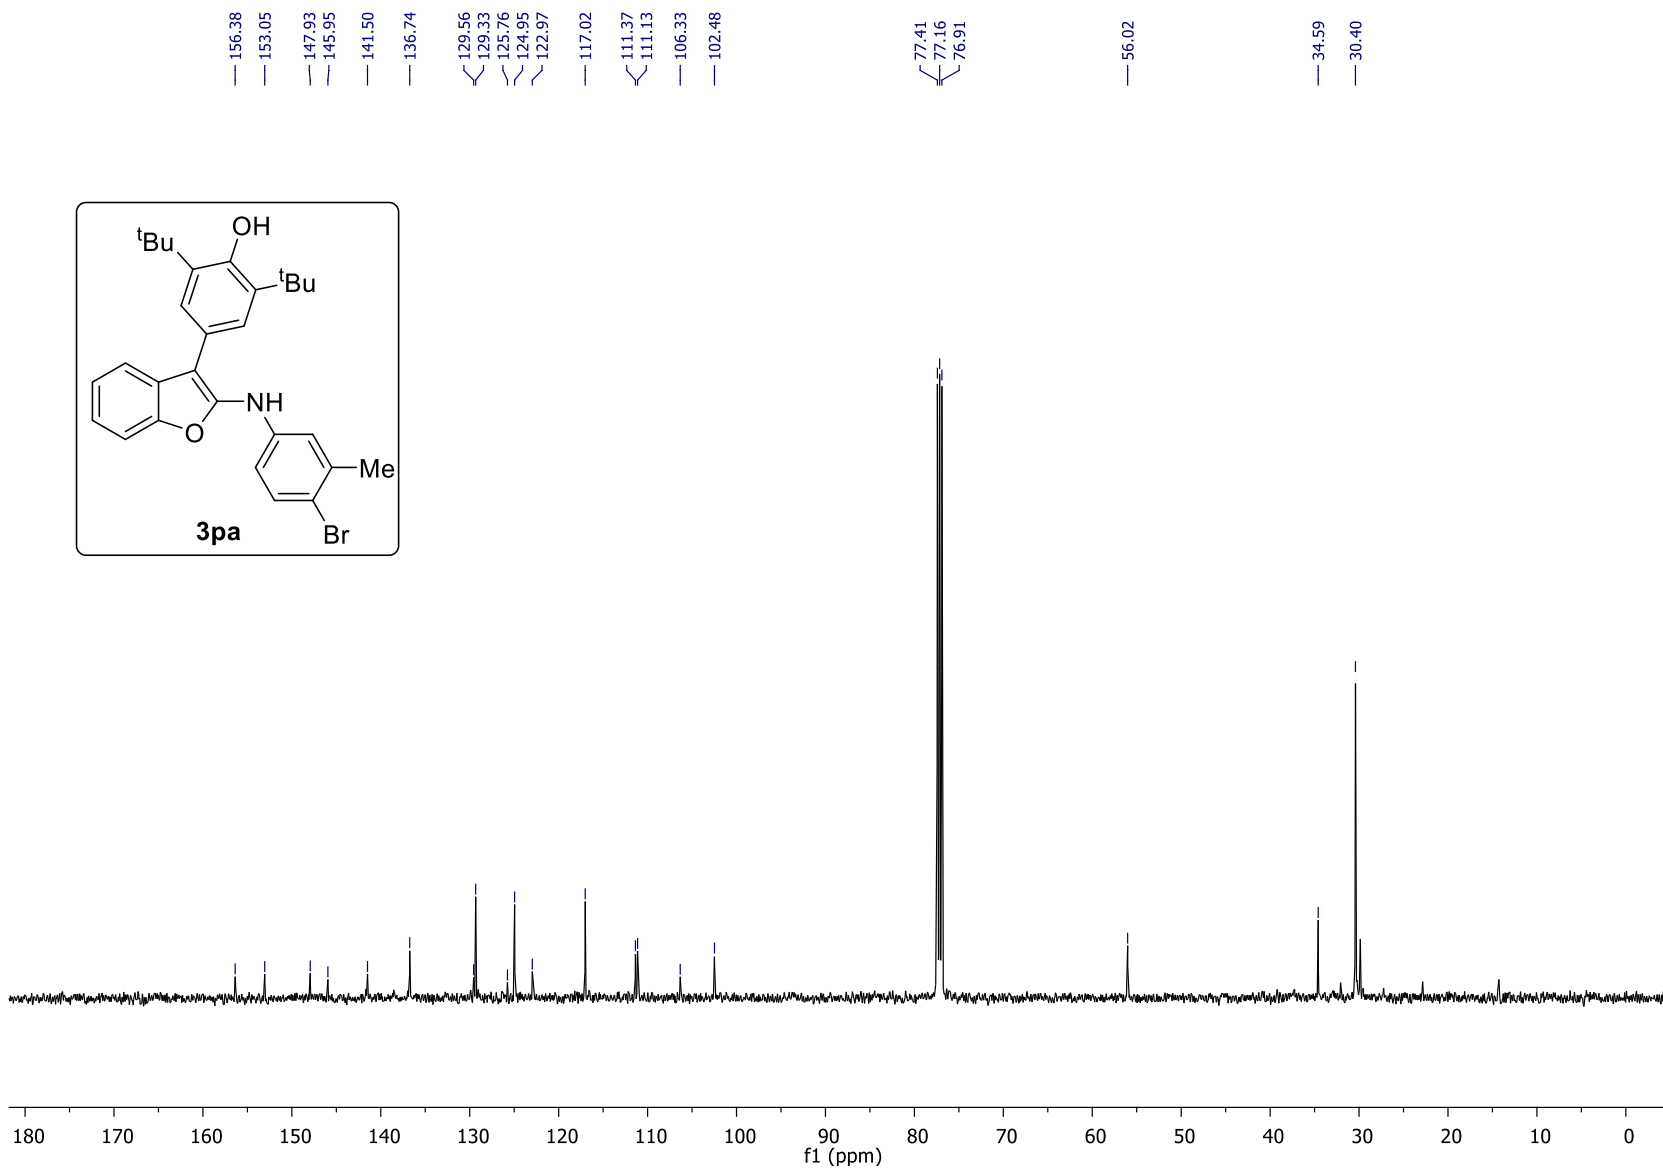

$^1\text{H}$  NMR of compound **3qa** in  $\text{CDCl}_3$

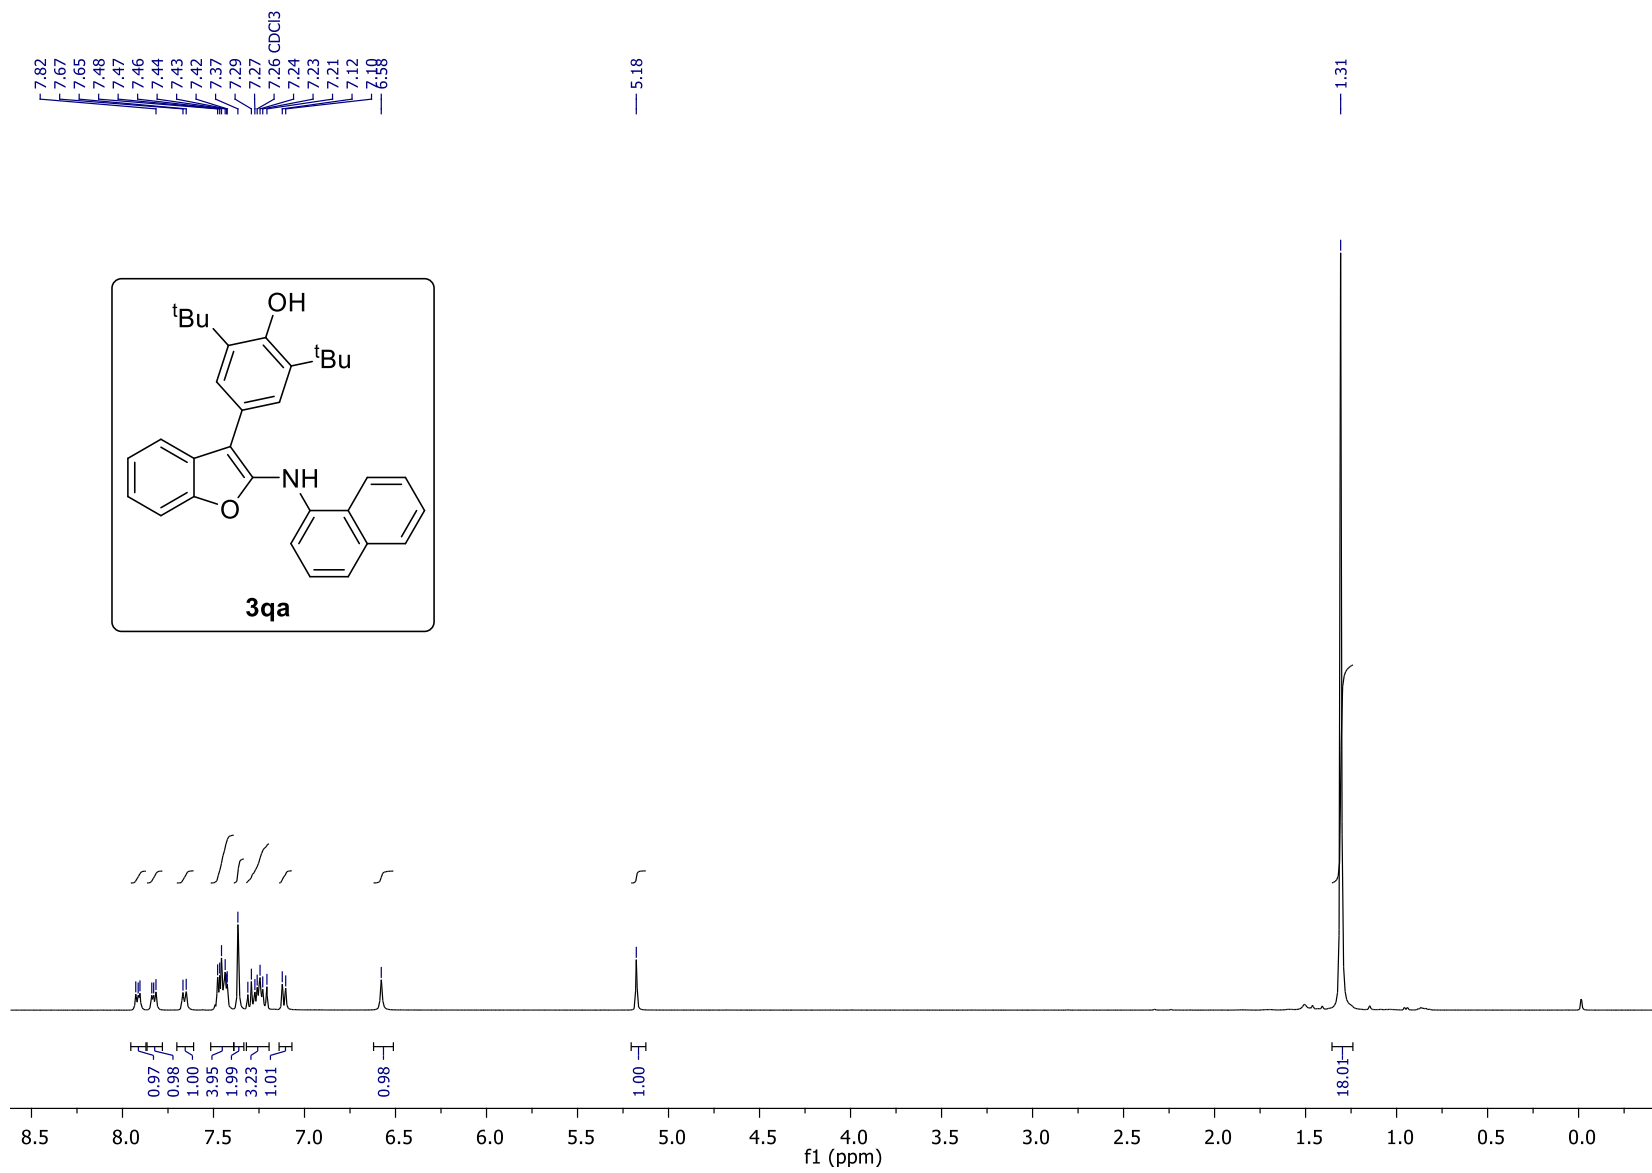

$^{13}\text{C}$  NMR of compound **3qa** in  $\text{CDCl}_3$

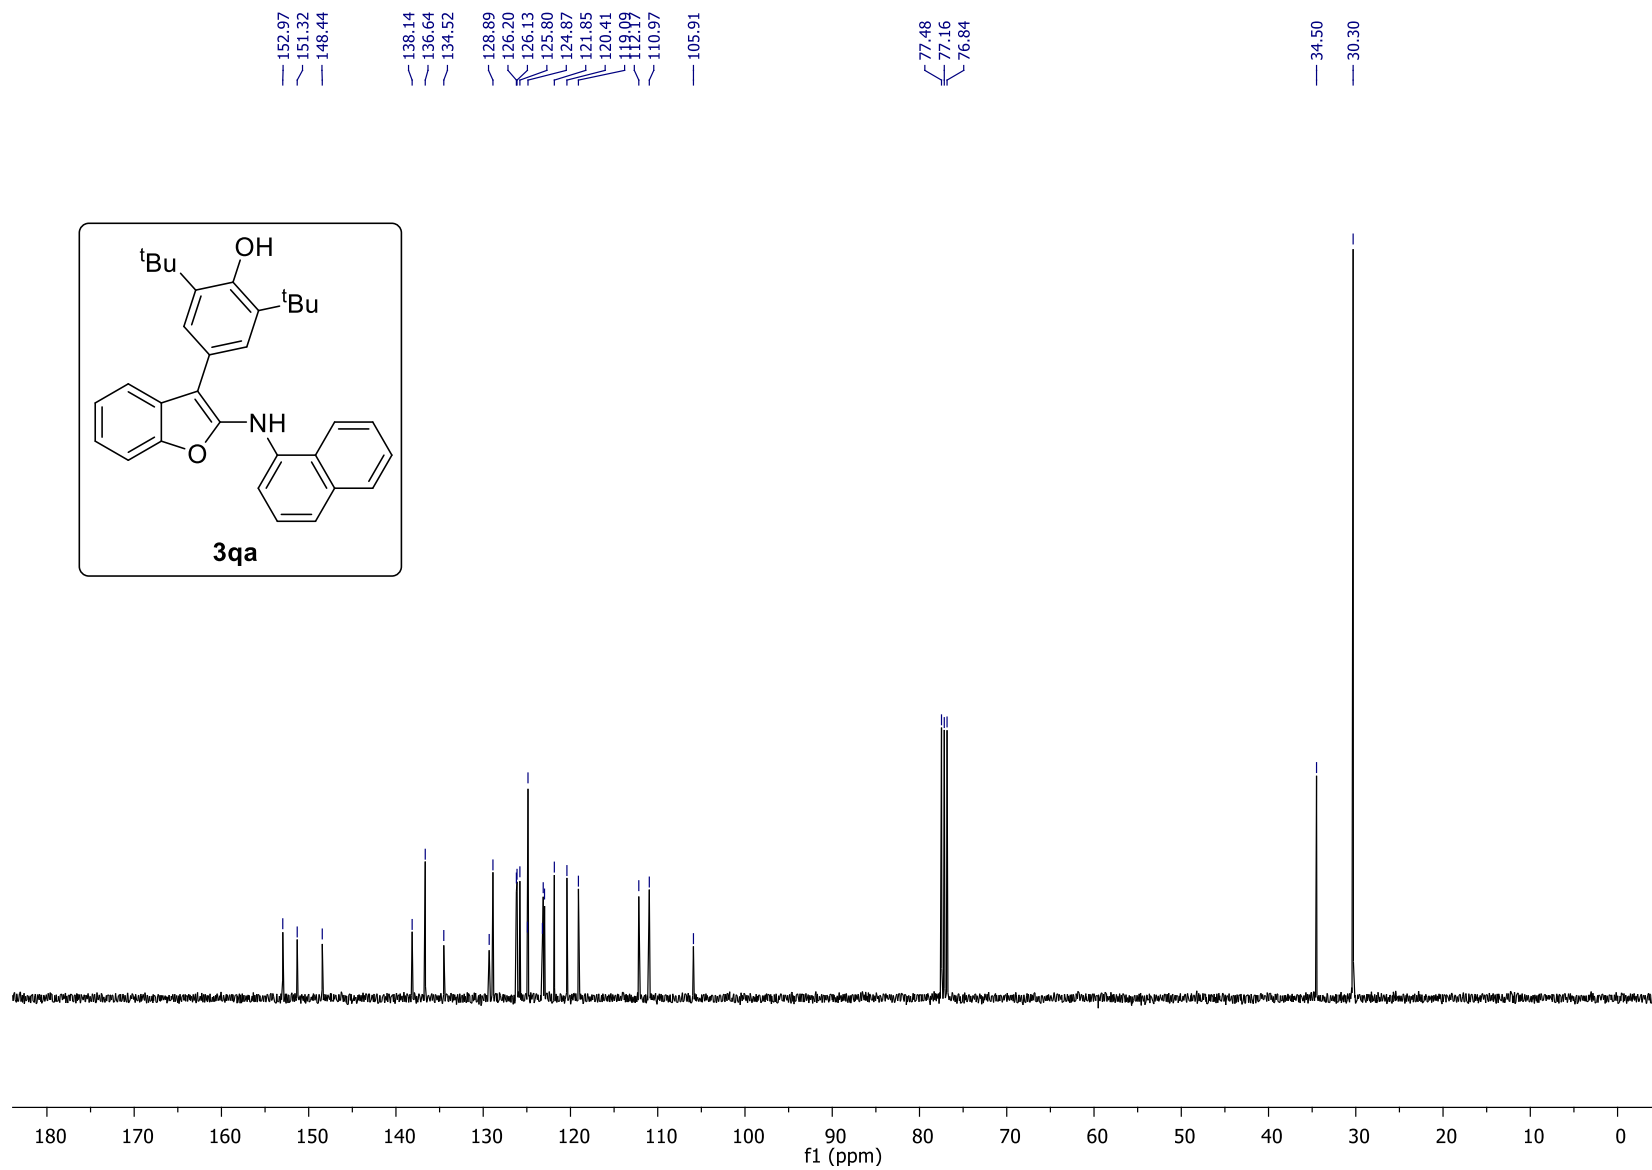

$^1\text{H}$  NMR of compound **3ra** in  $\text{CDCl}_3$

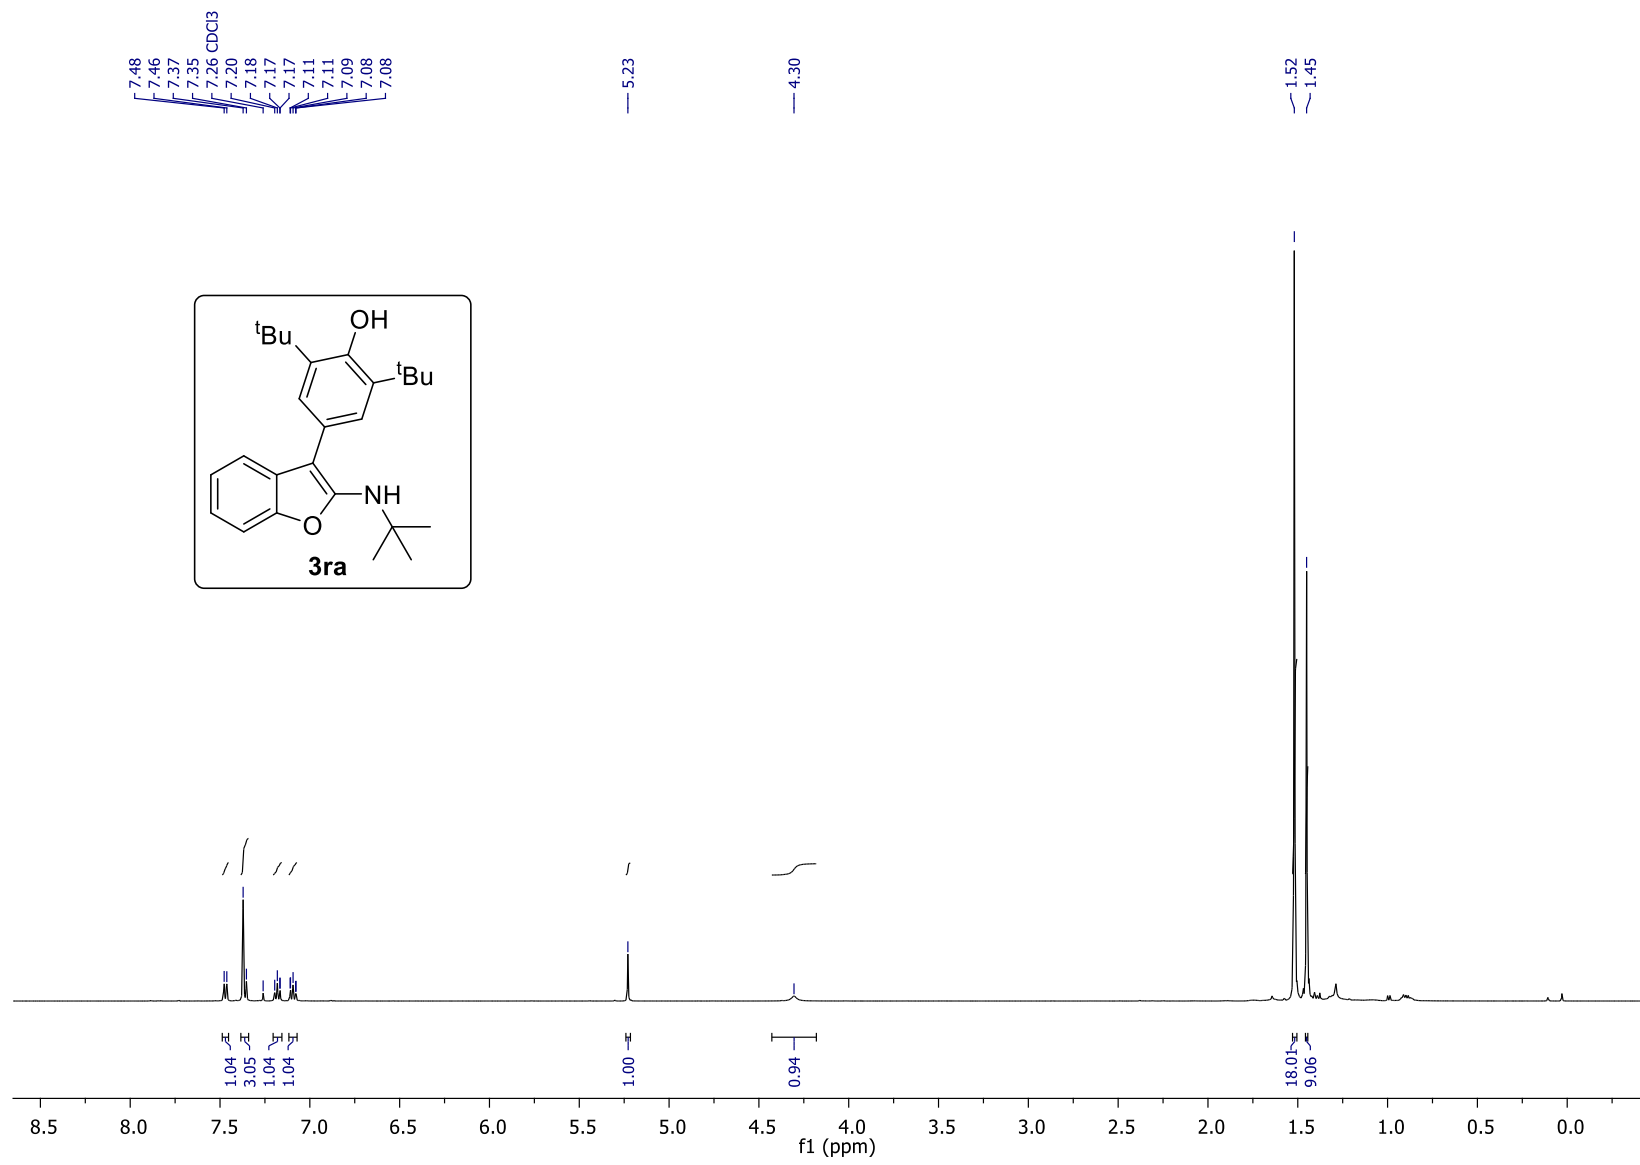

$^{13}\text{C}$  NMR of compound **3ra** in  $\text{CDCl}_3$

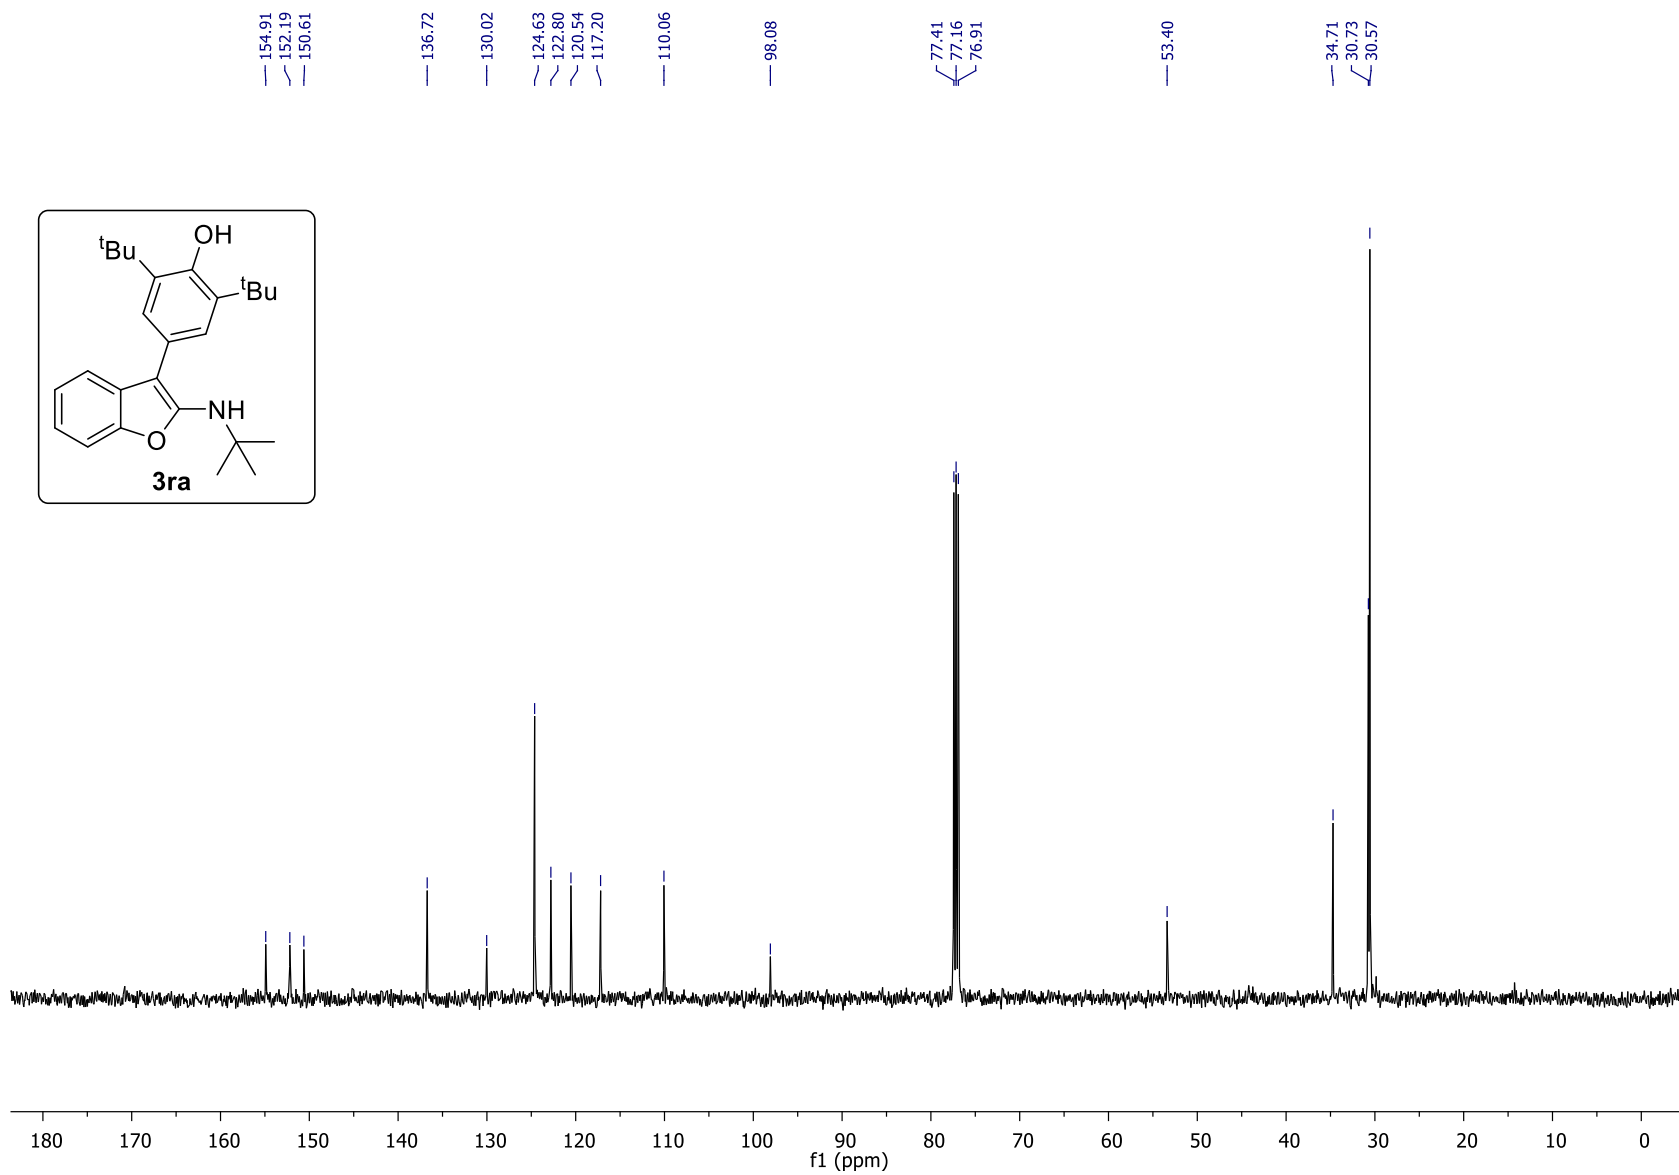



$^1\text{H}$  NMR of compound **3sa** in  $\text{CDCl}_3$

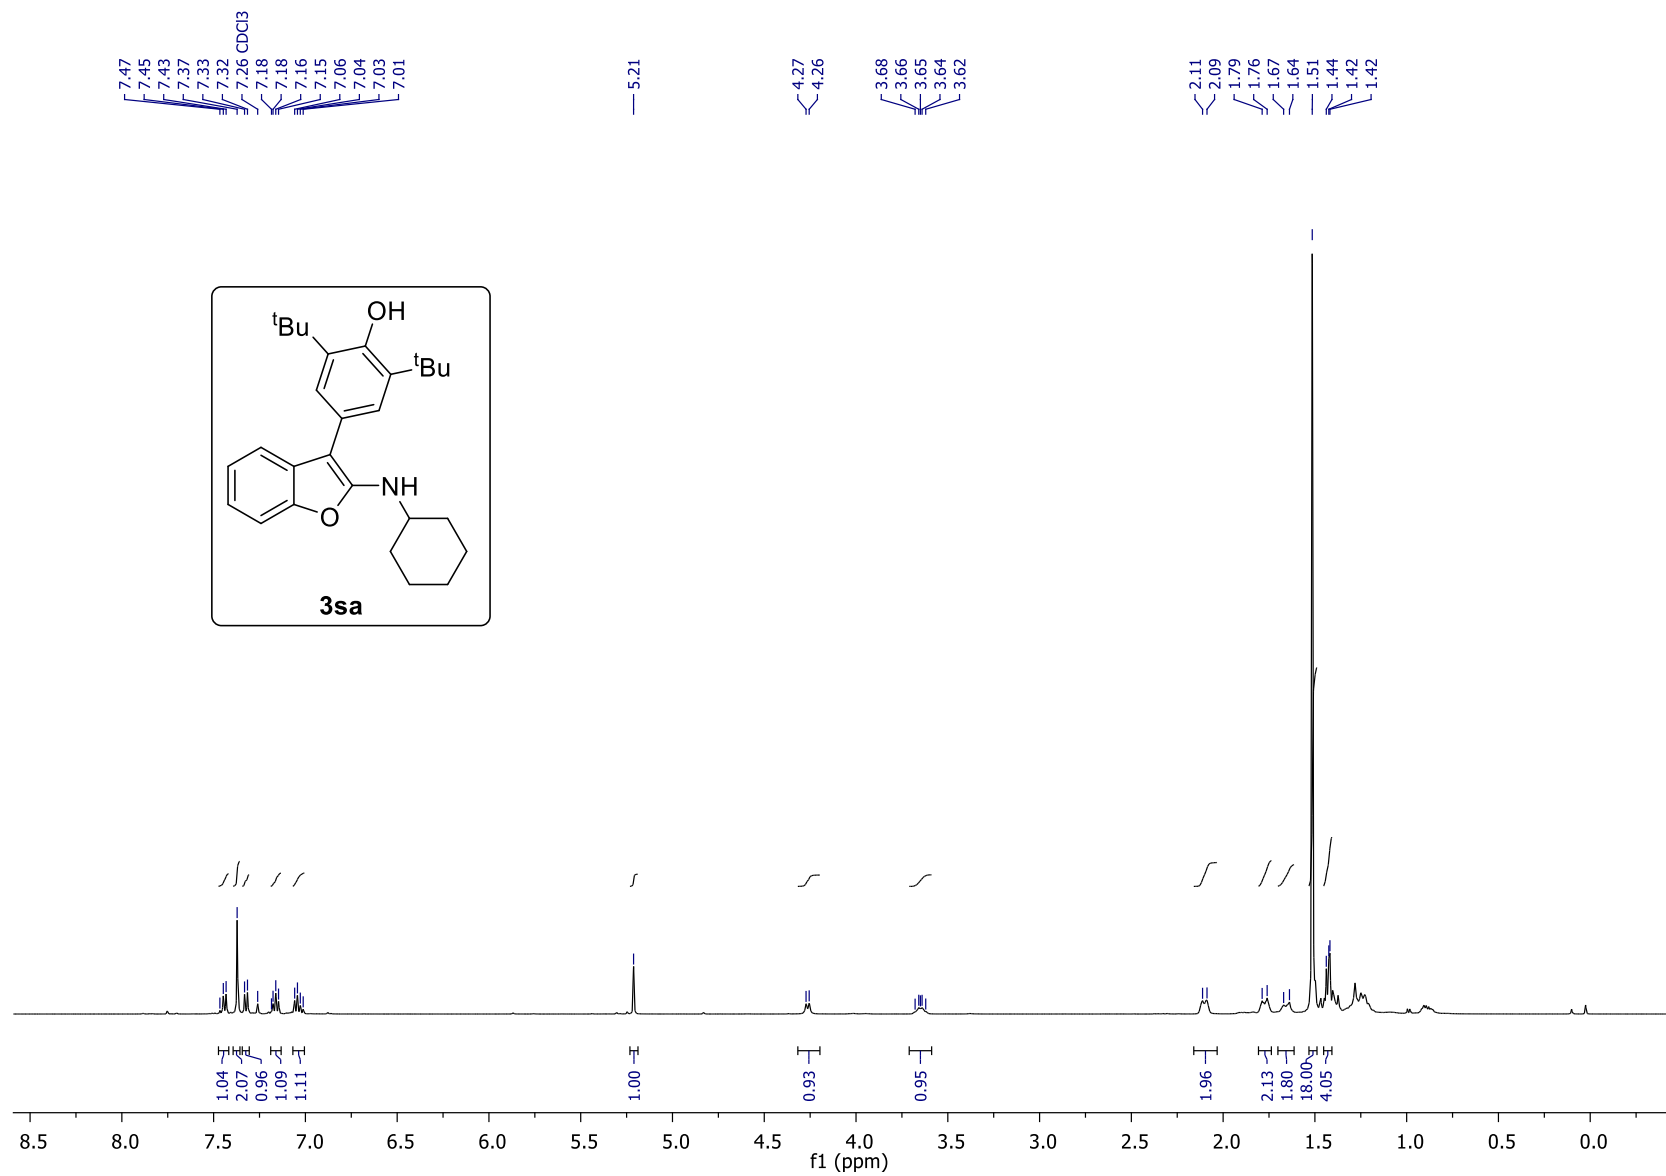

$^{13}\text{C}$  NMR of compound **3sa** in  $\text{CDCl}_3$

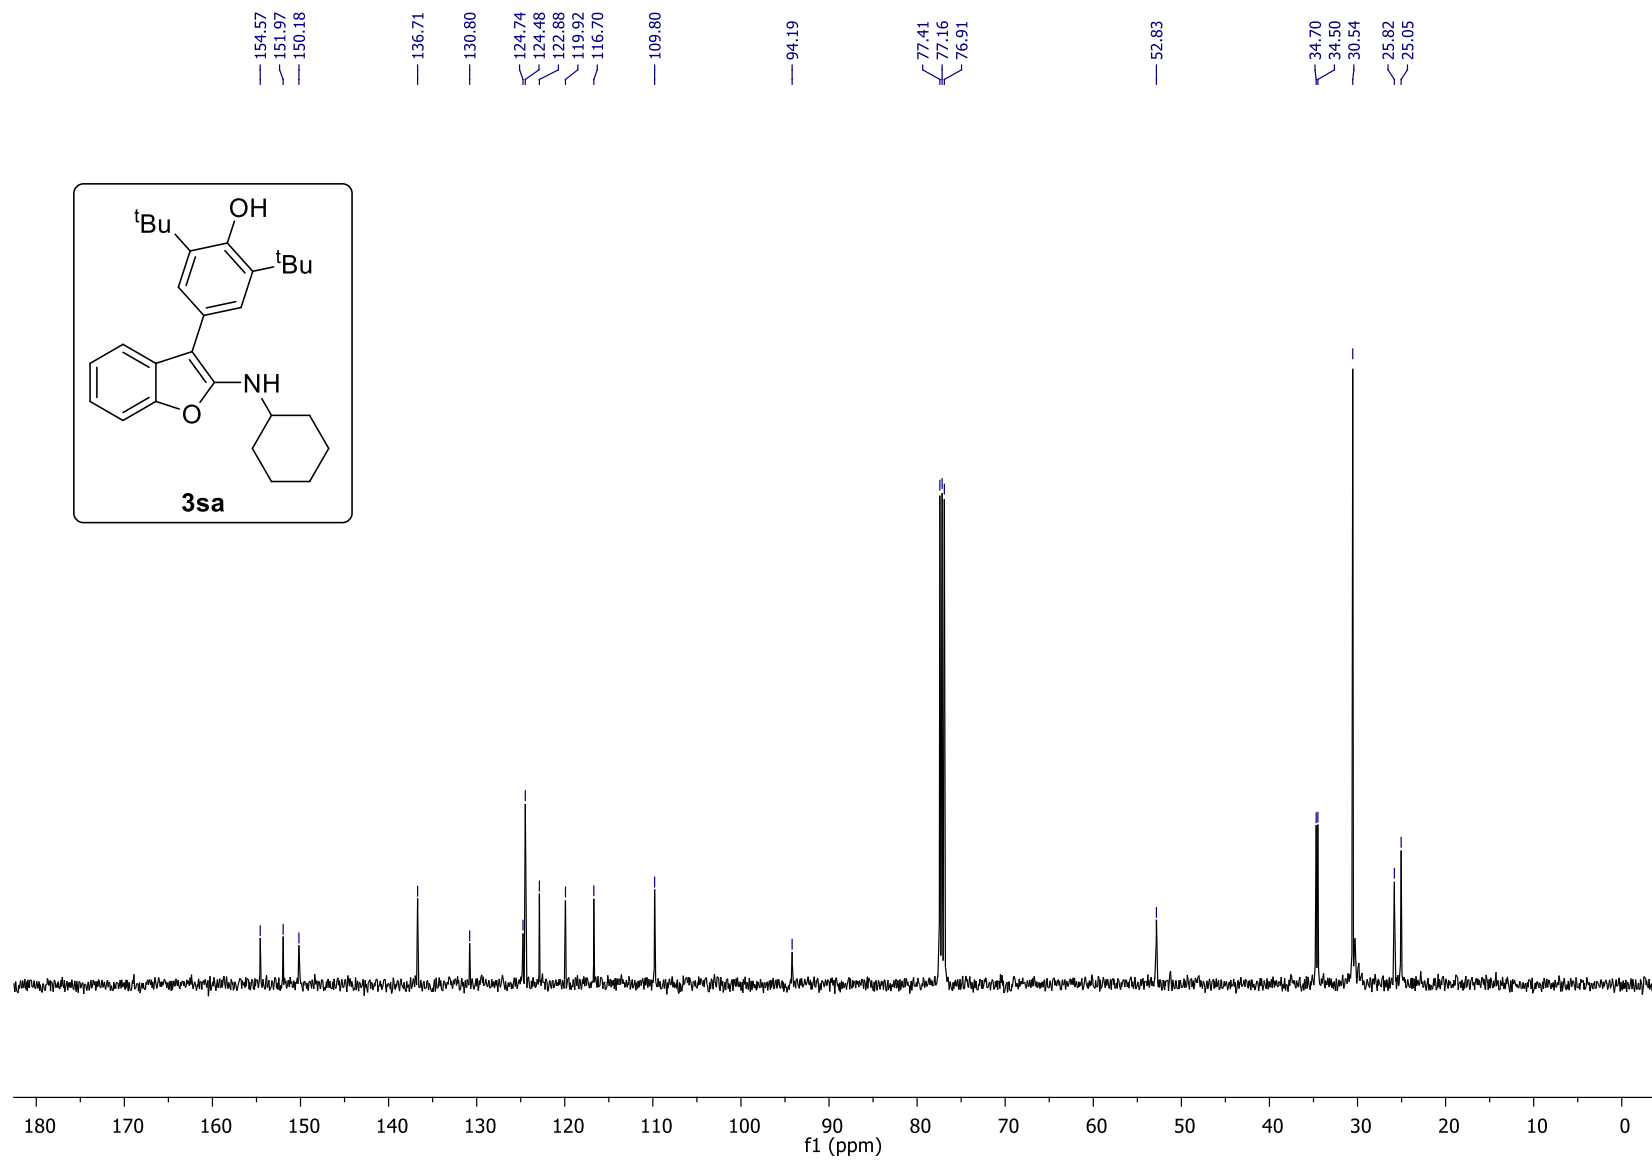

$^1\text{H}$  NMR of compound **3ta** in  $\text{CDCl}_3$

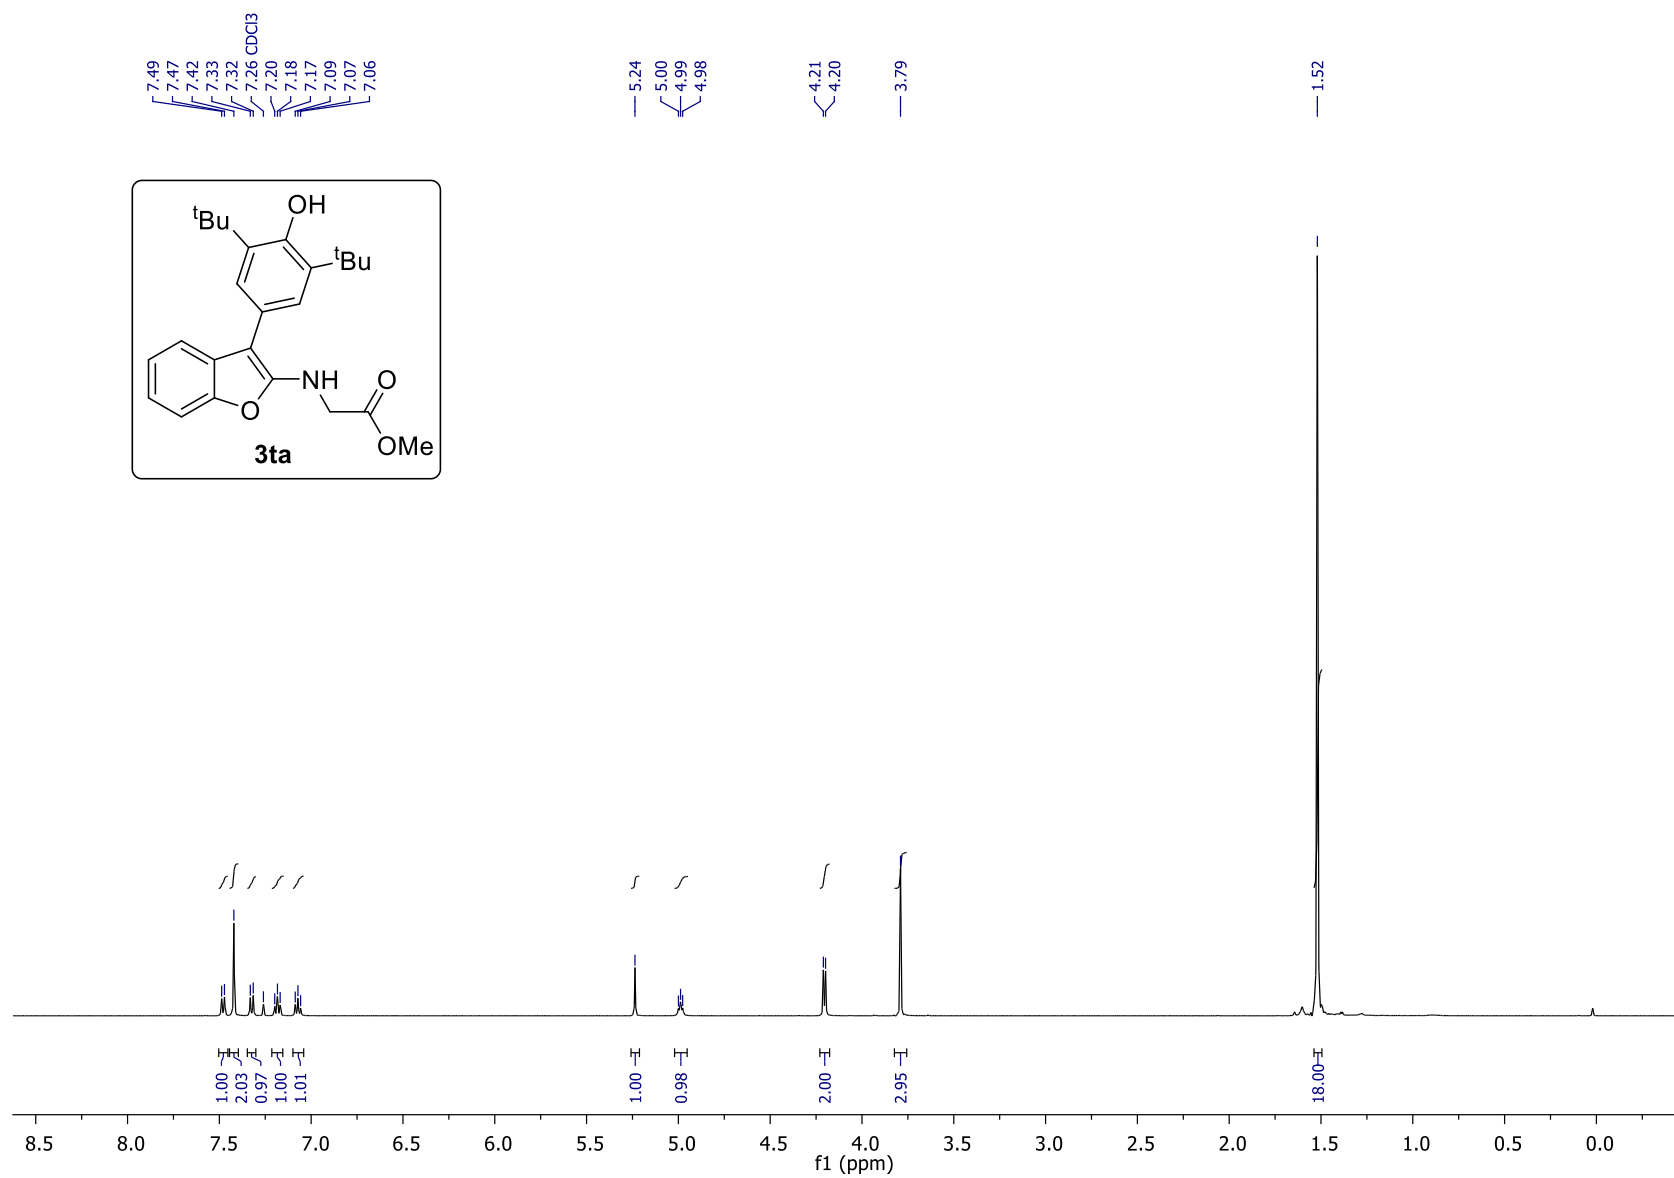

$^{13}\text{C}$  NMR of compound **3ta** in  $\text{CDCl}_3$

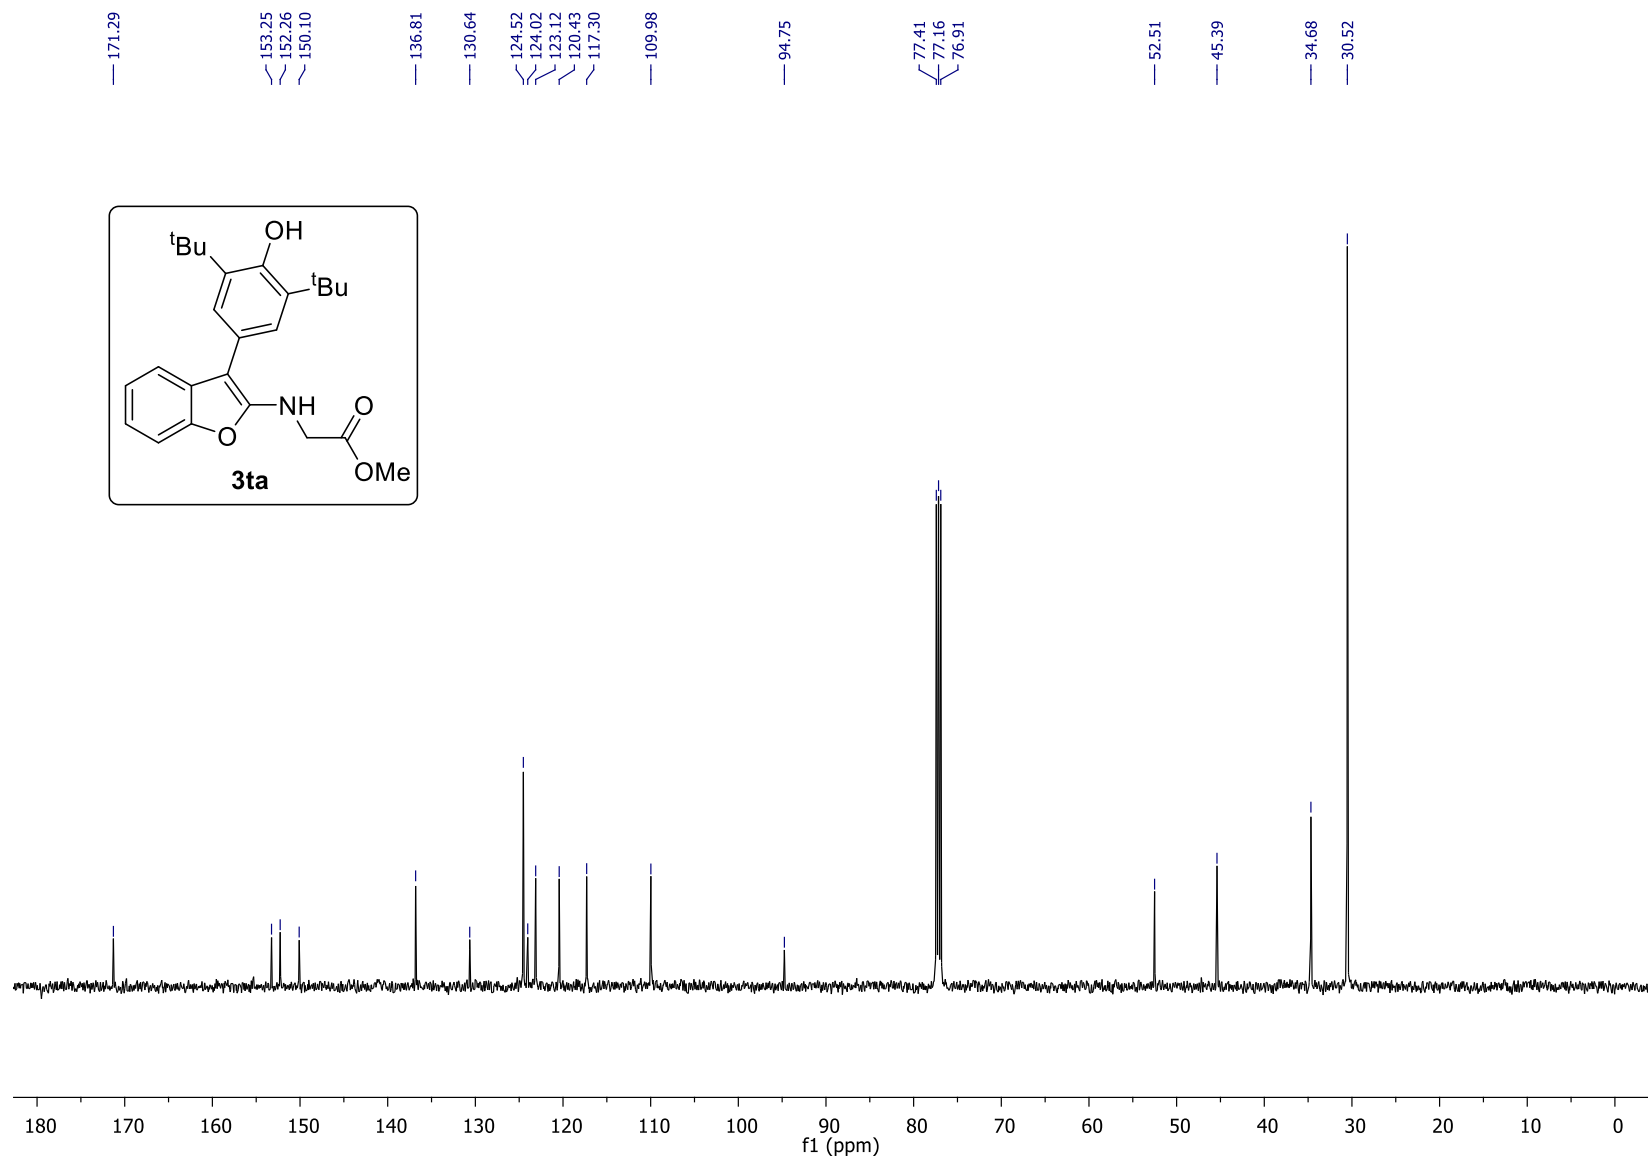

$^1\text{H}$  NMR of compound **3ua** in  $\text{CDCl}_3$

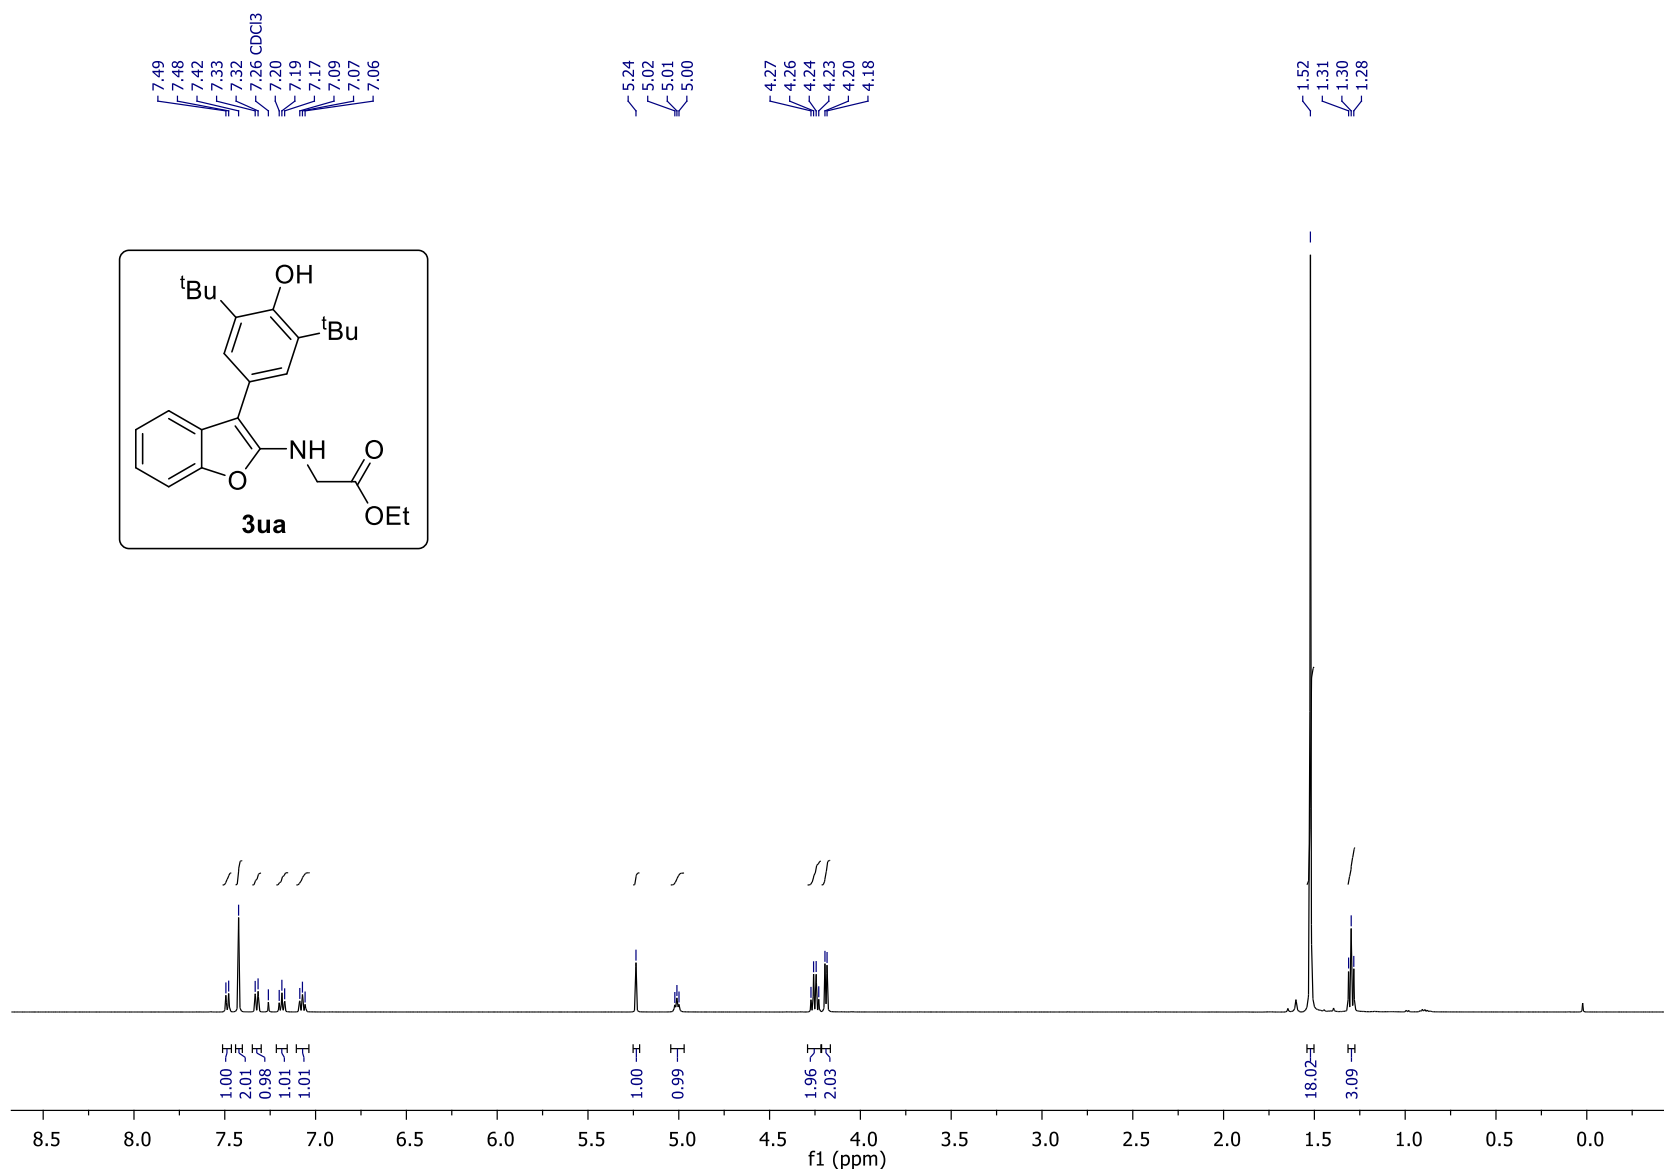

$^{13}\text{C}$  NMR of compound **4ua** in  $\text{CDCl}_3$

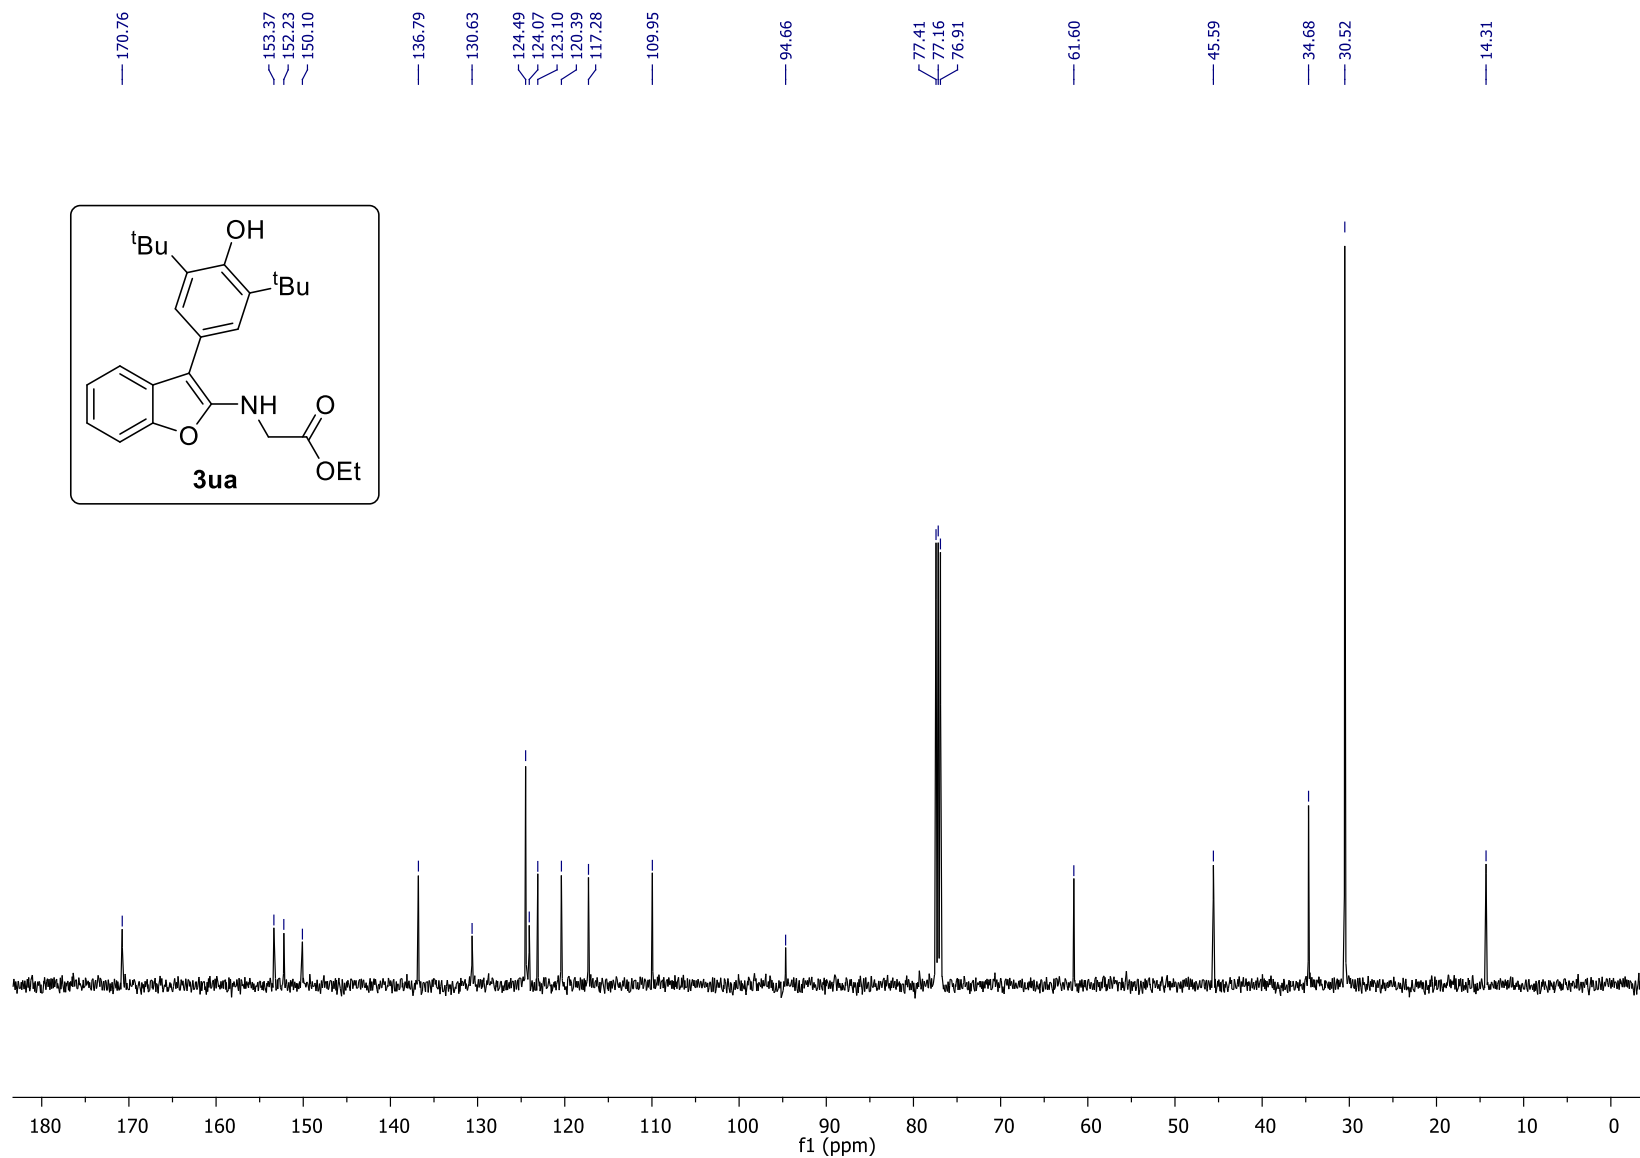

$^1\text{H}$  NMR of compound **5aa** in  $\text{CDCl}_3$

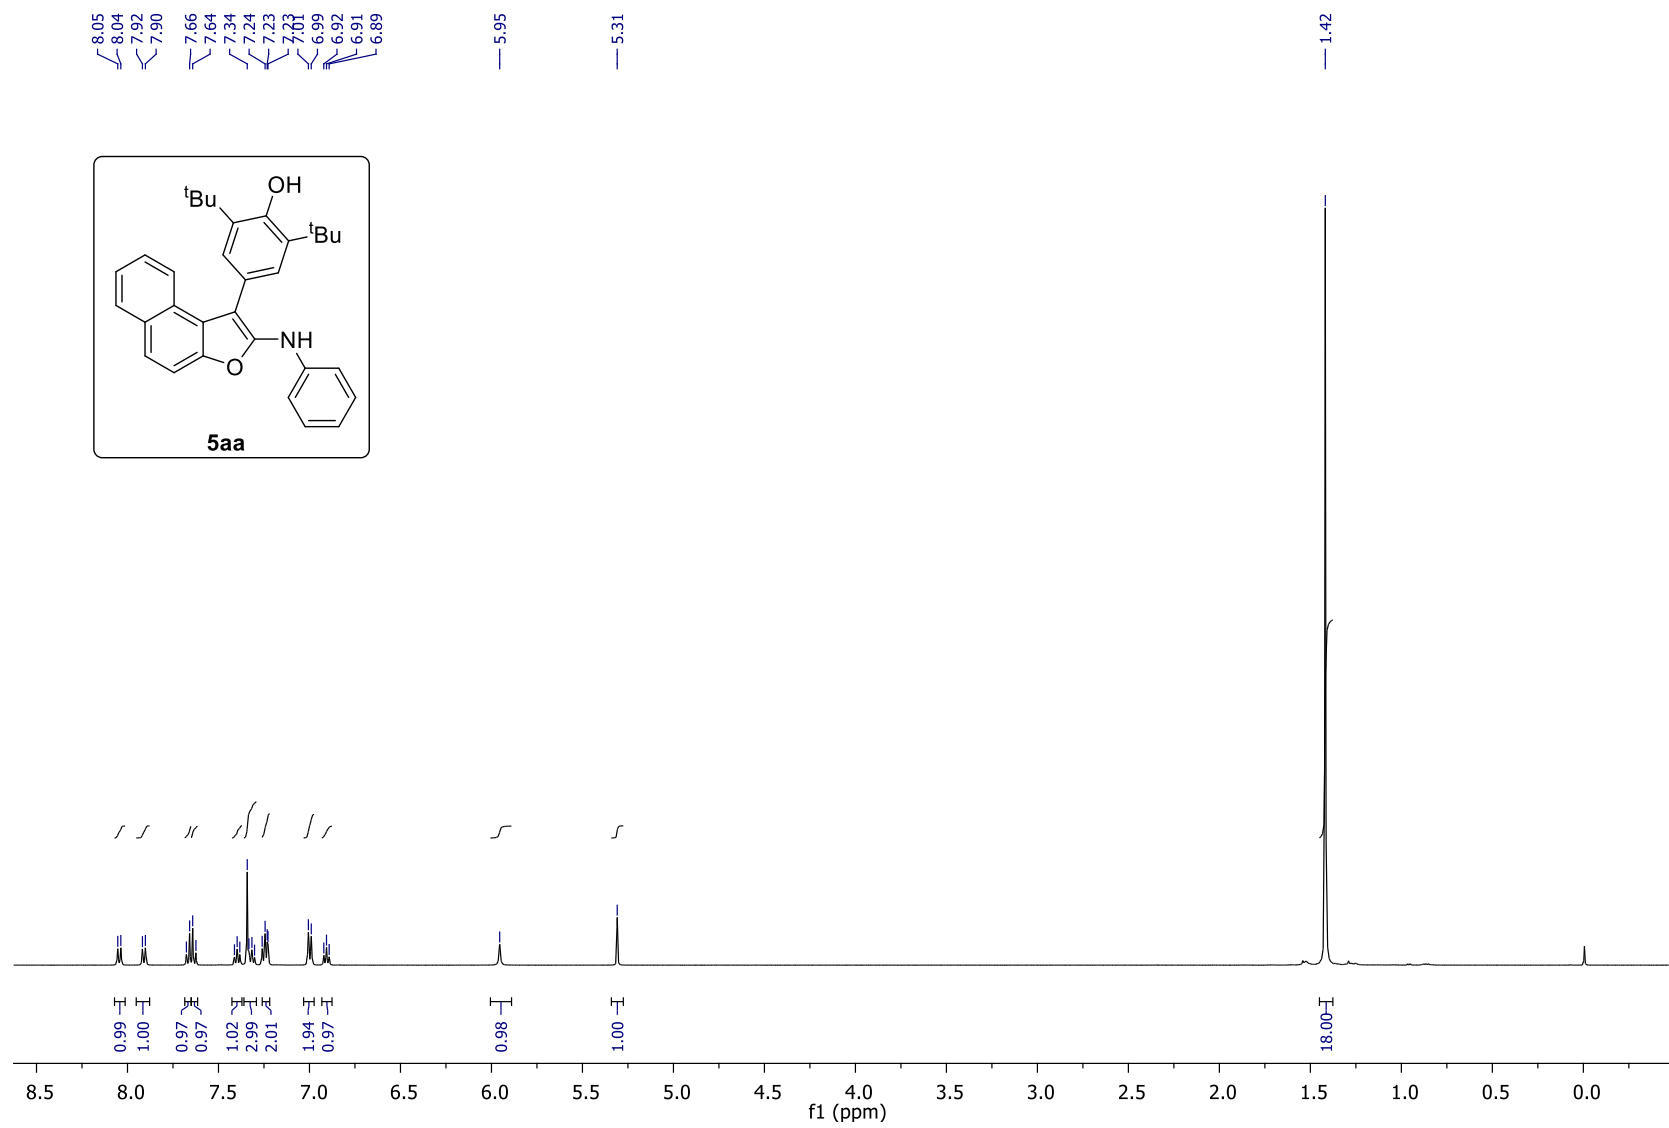

$^{13}\text{C}$  NMR of compound **5aa** in  $\text{CDCl}_3$

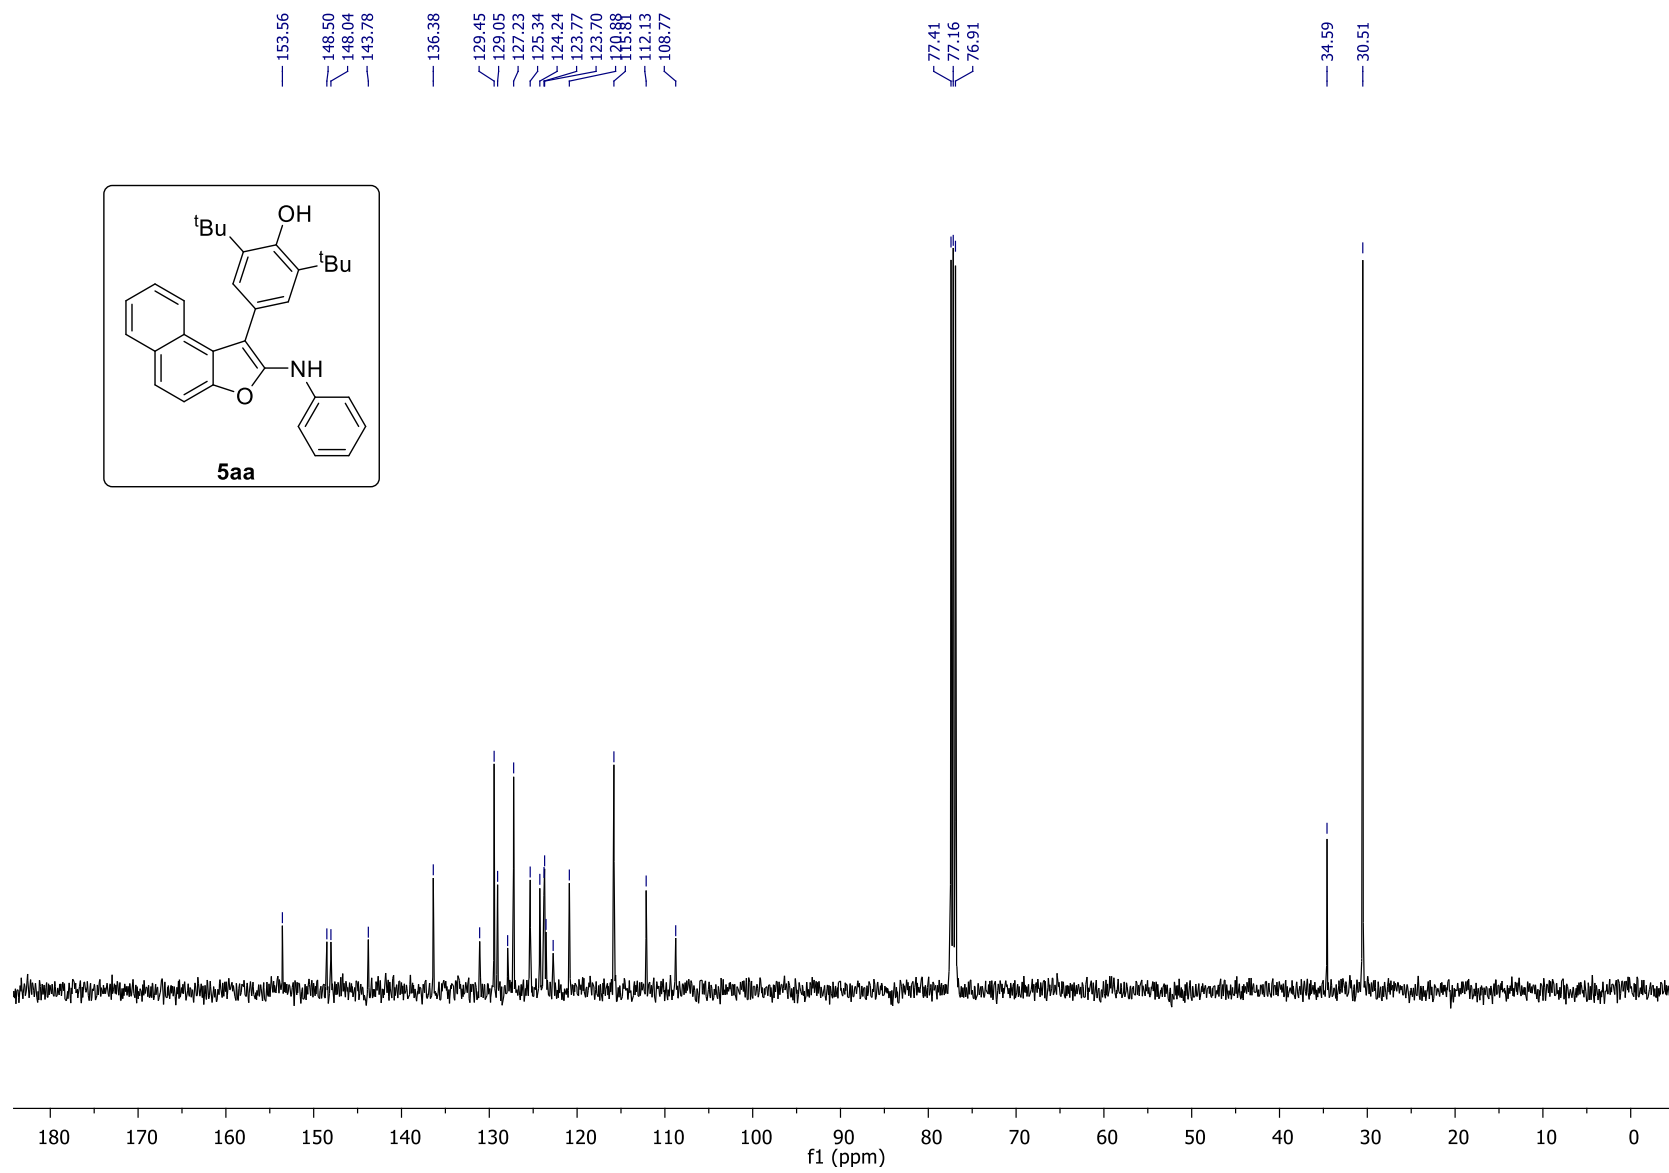



$^1\text{H}$  NMR of compound **5ab** in  $\text{CDCl}_3$

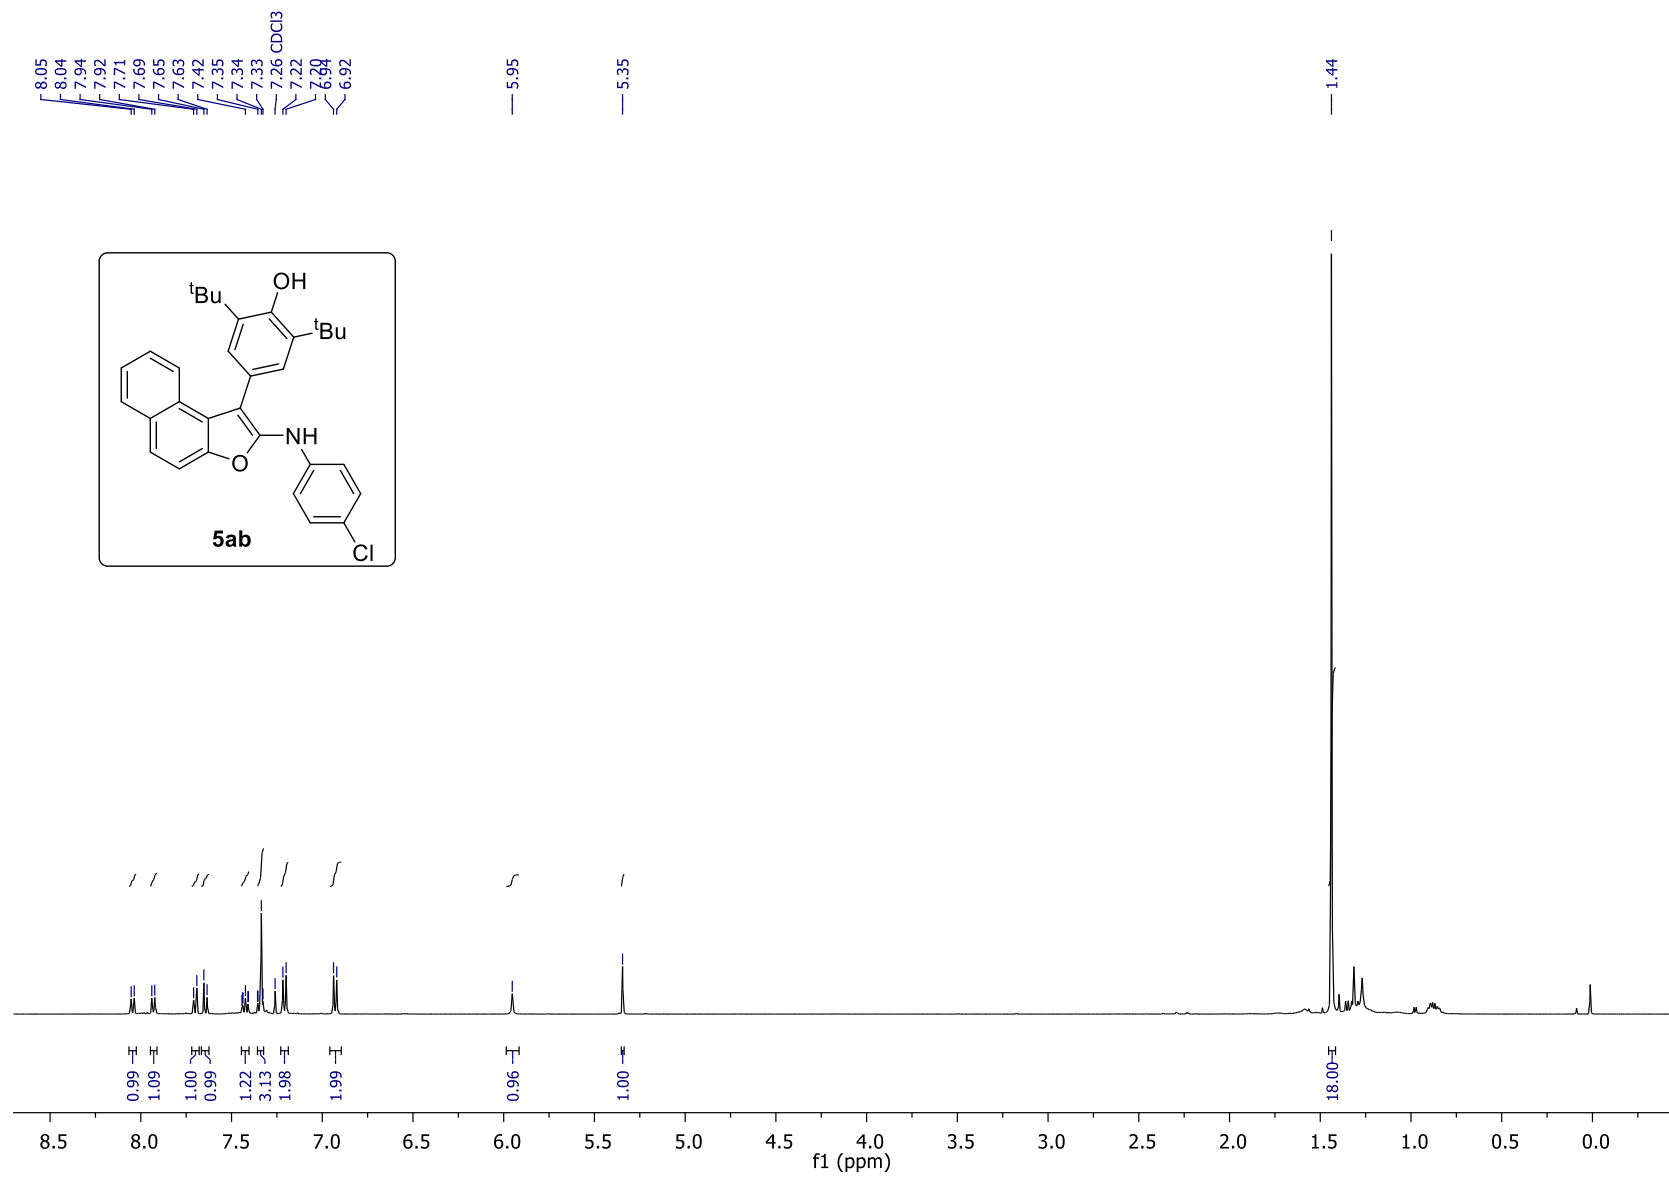

$^{13}\text{C}$  NMR of compound **5ab** in  $\text{CDCl}_3$

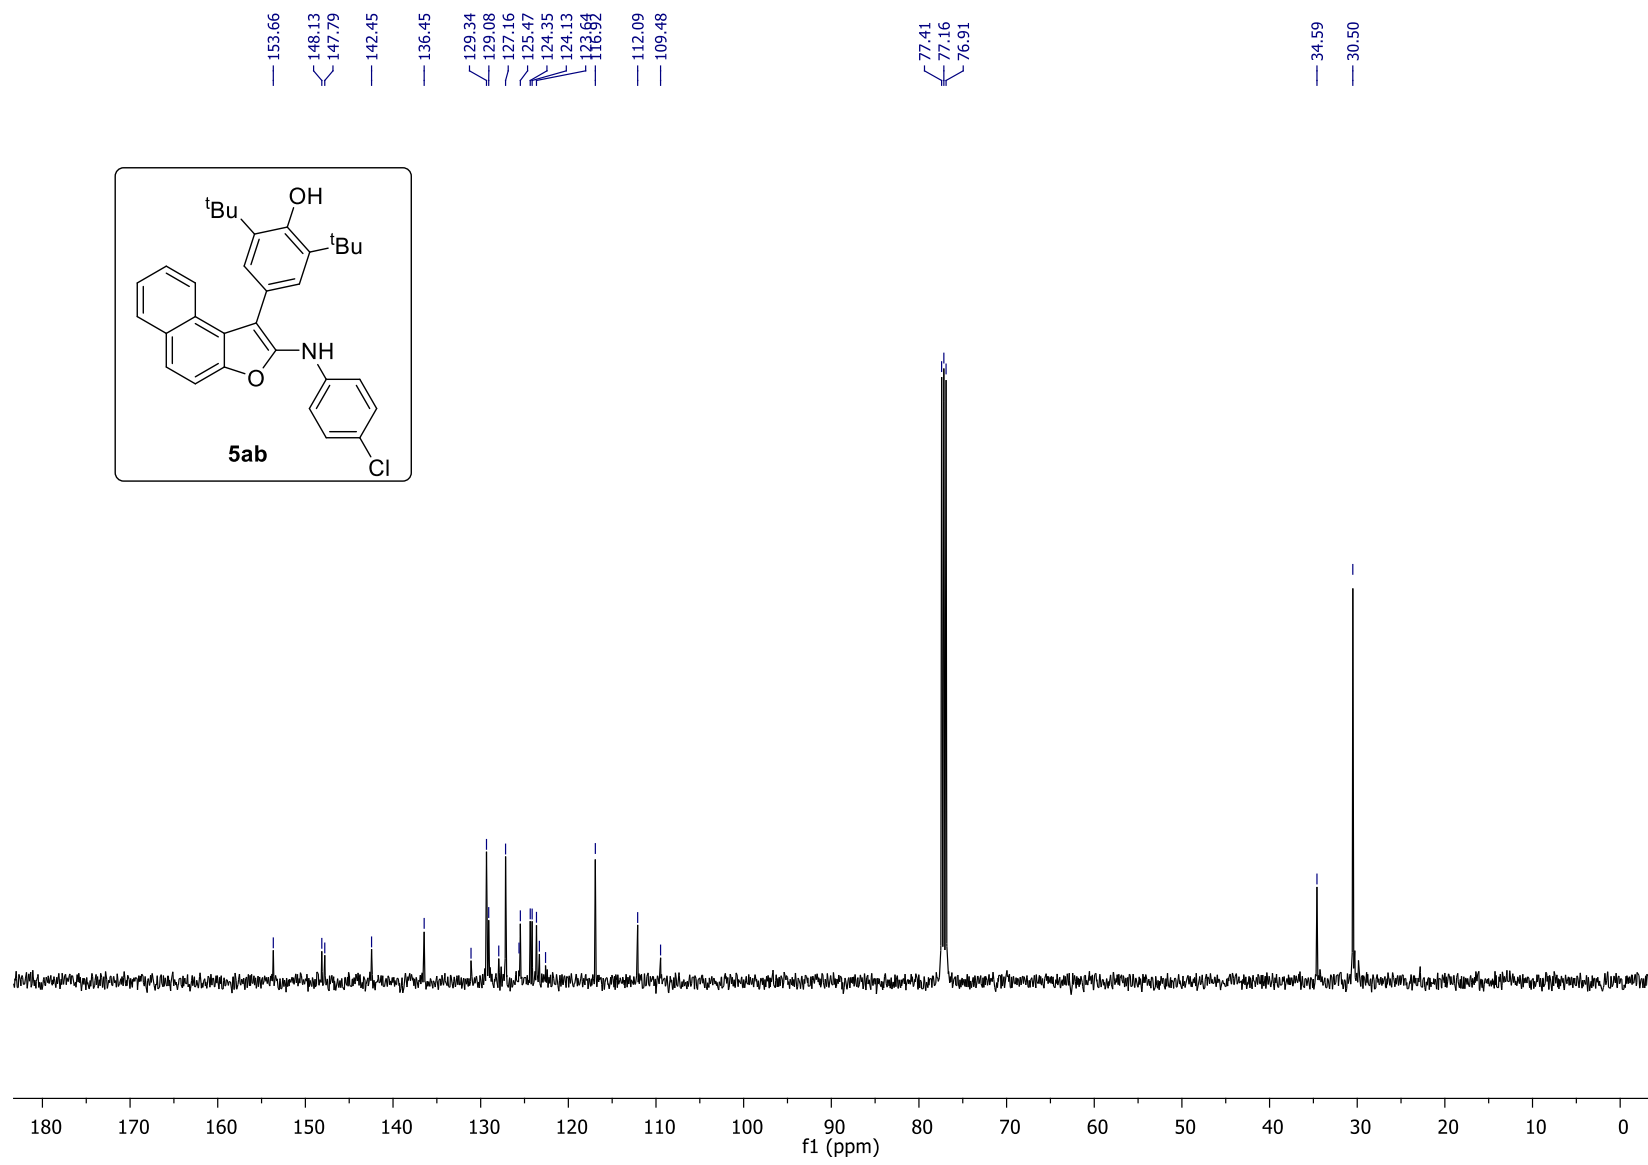

$^1\text{H}$  NMR of compound **5ac** in  $\text{CDCl}_3$

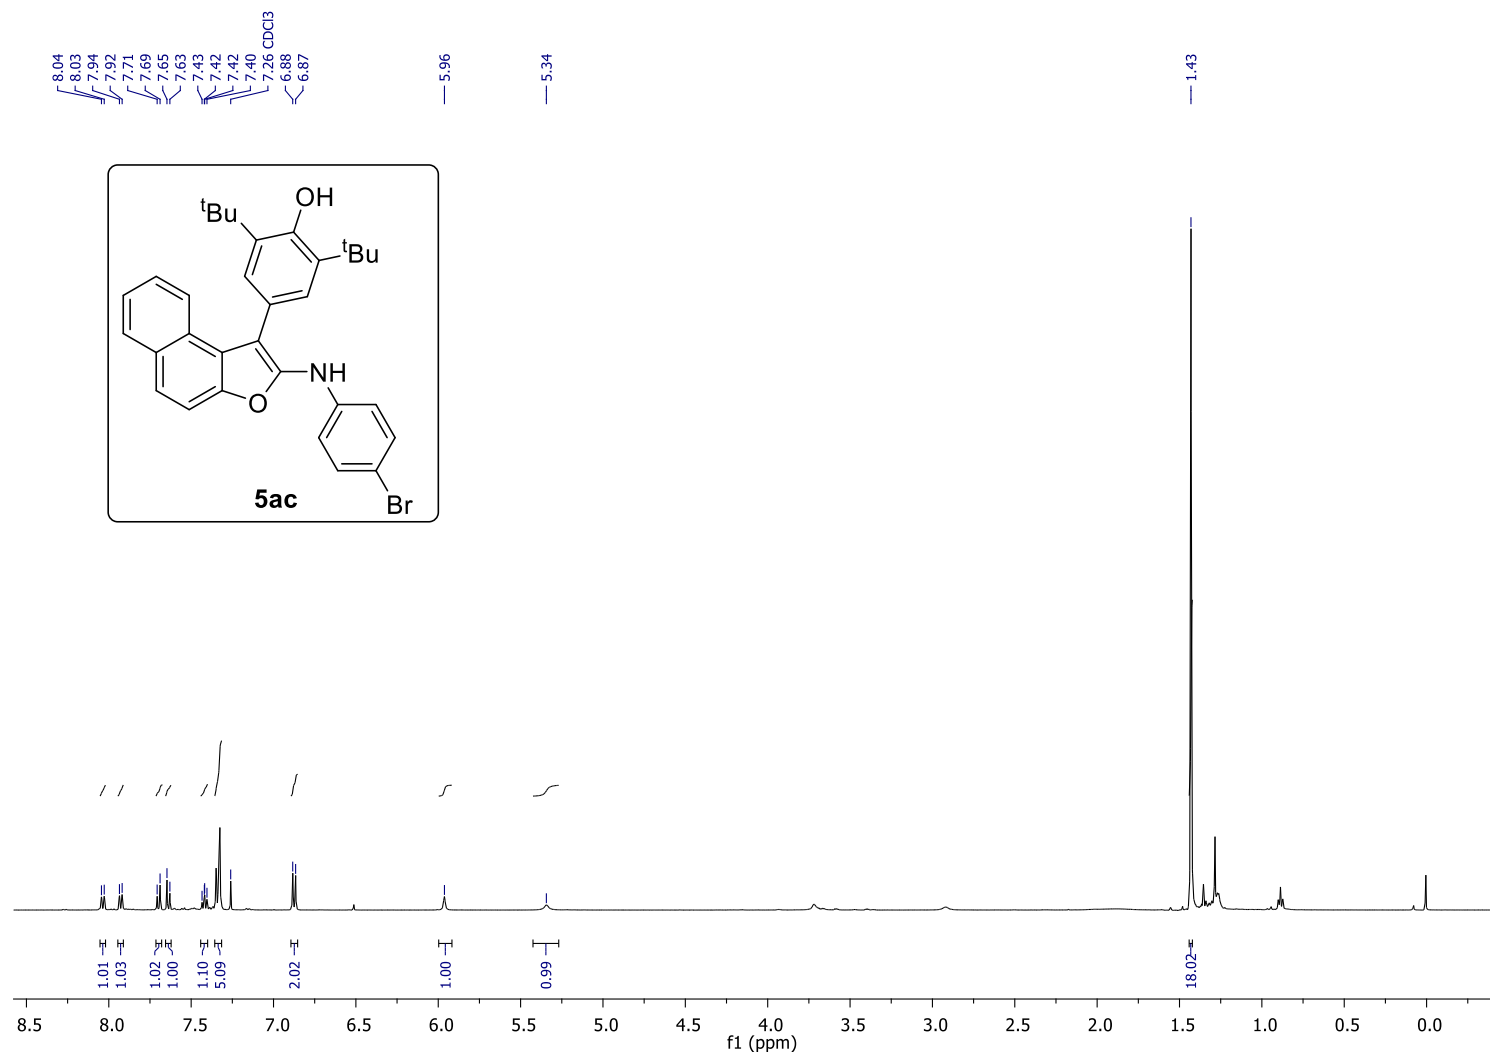

$^{13}\text{C}$  NMR of compound **5ac** in  $\text{CDCl}_3$

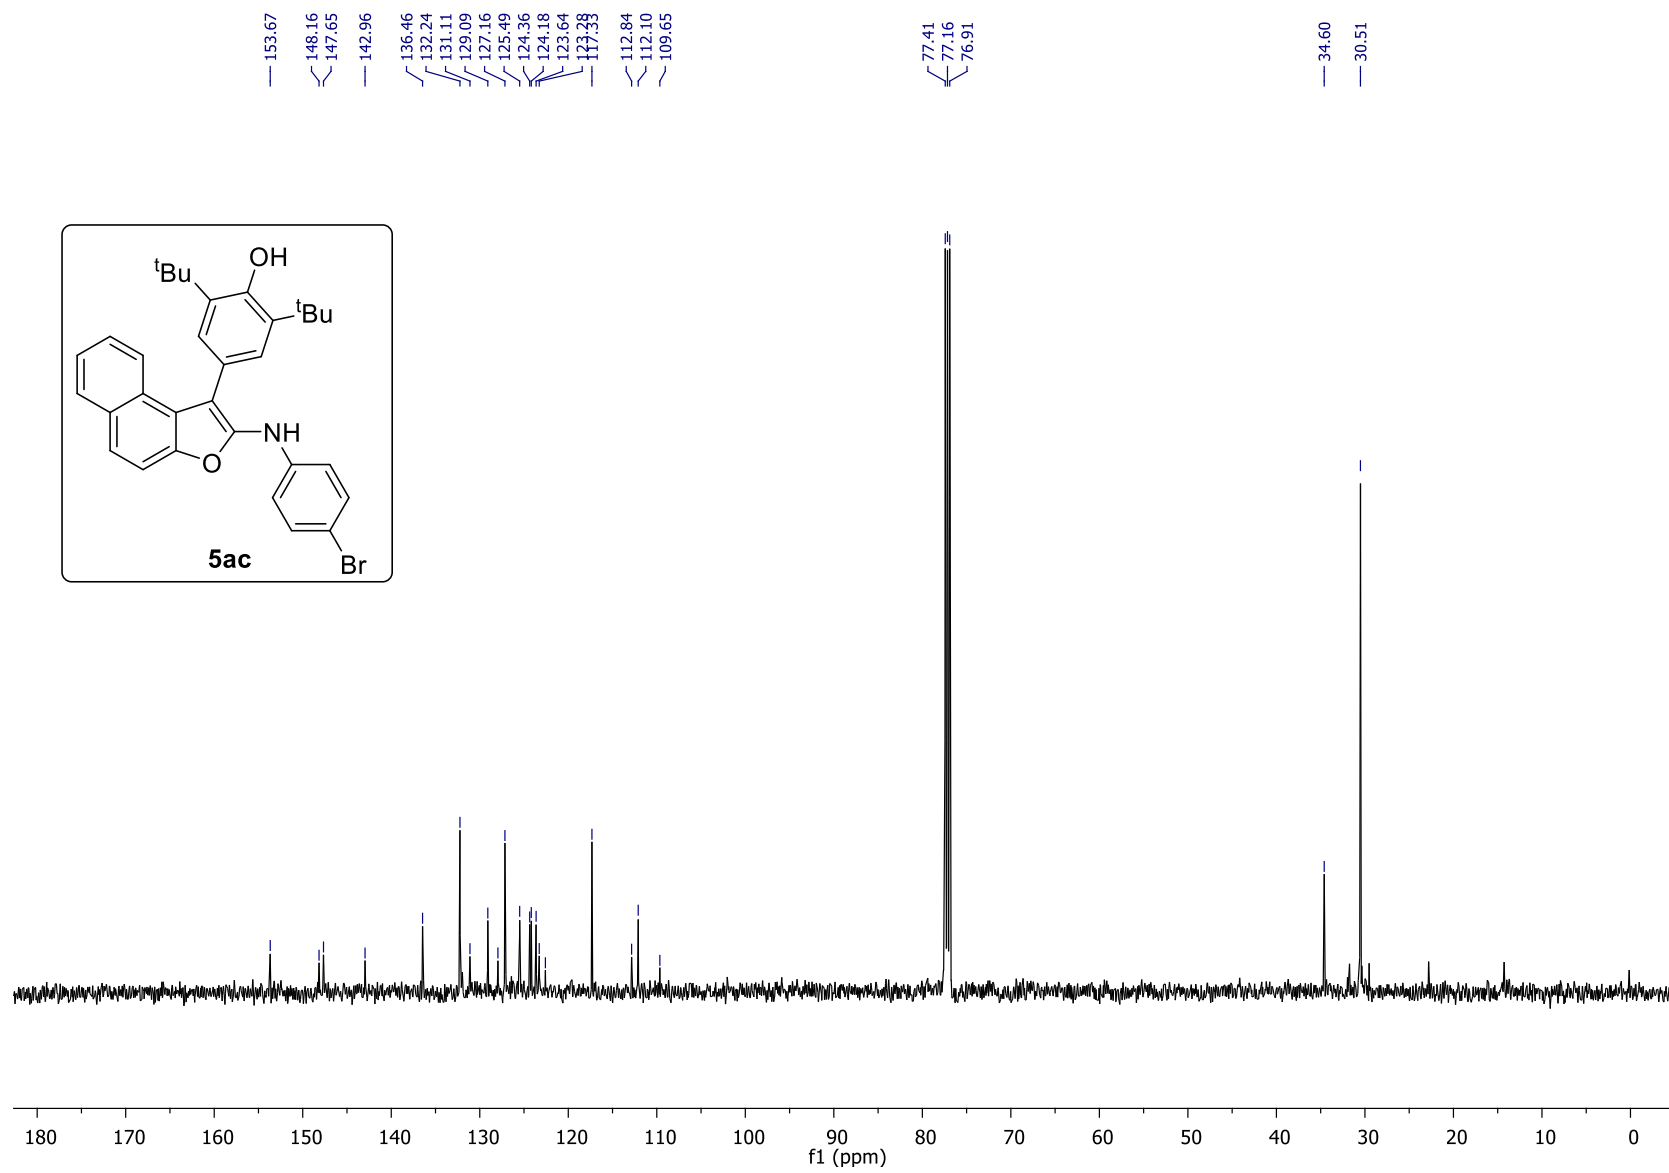

$^1\text{H}$  NMR of compound **5ad** in  $\text{CDCl}_3$

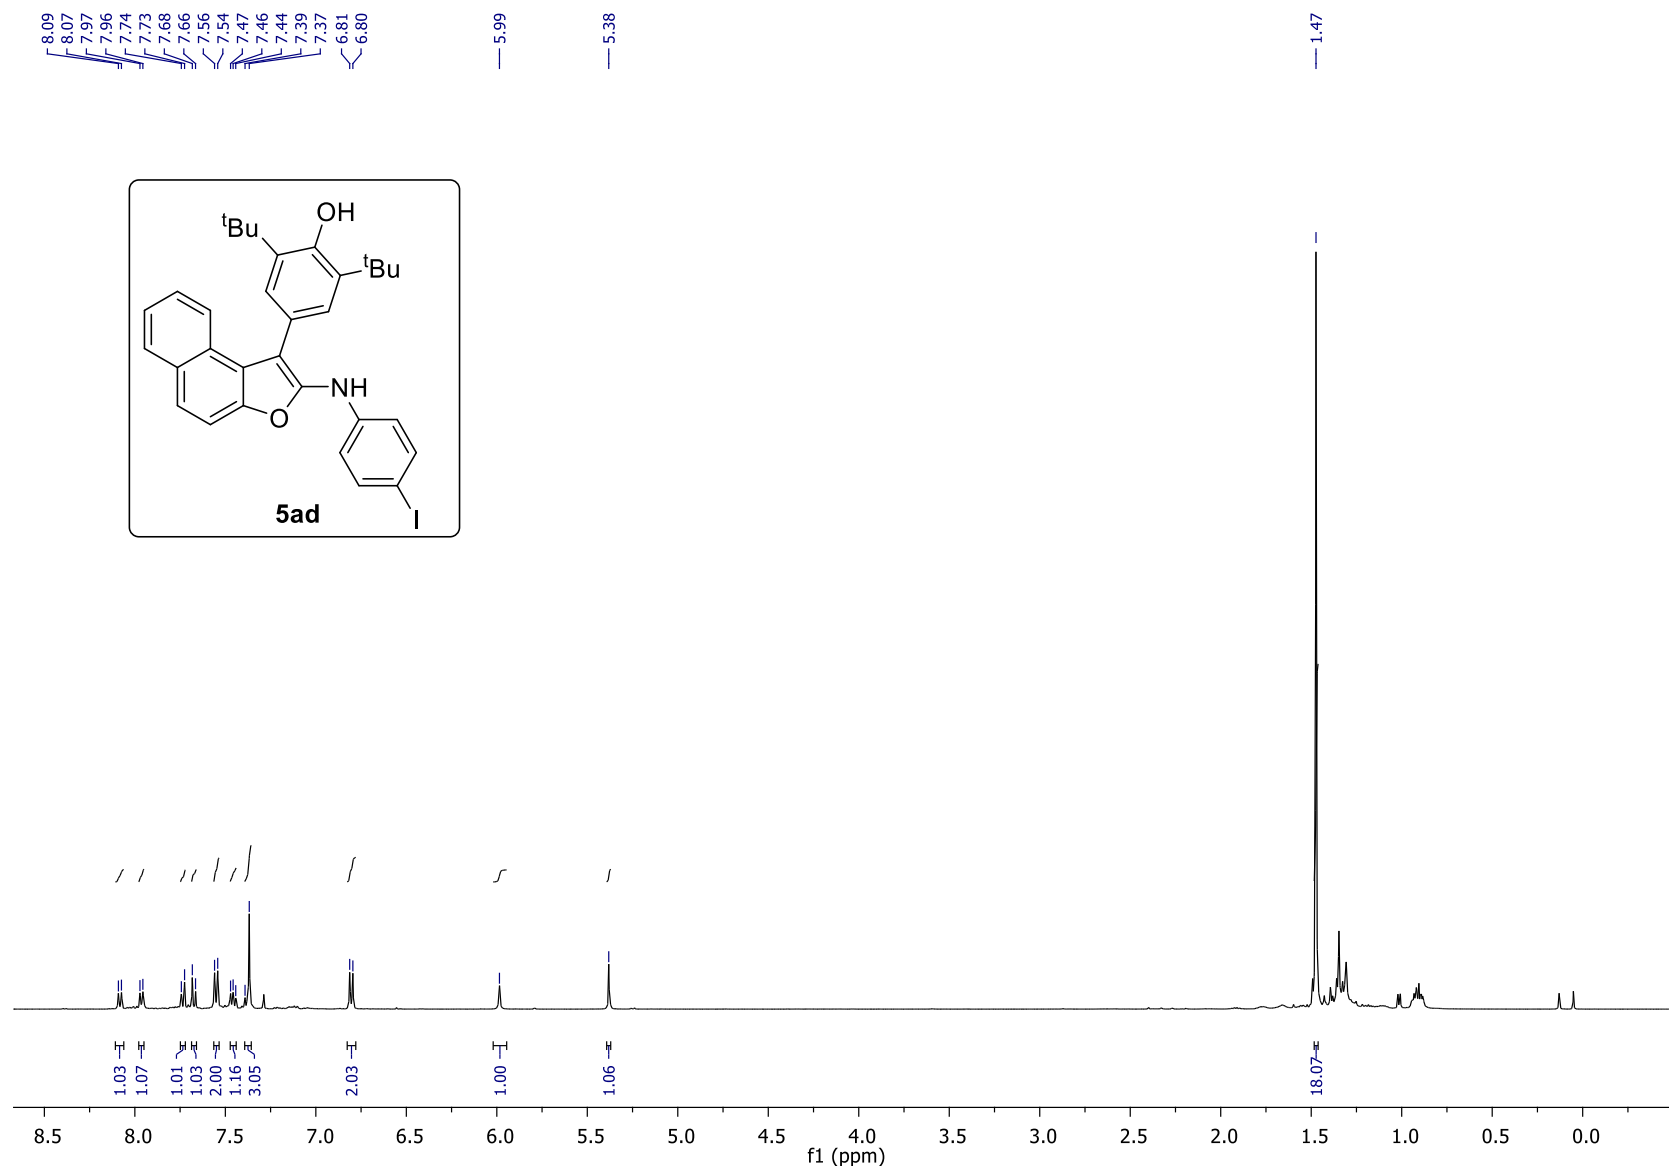

$^{13}\text{C}$  NMR of compound **5ad** in  $\text{CDCl}_3$

153.66  
148.17  
147.48  
143.61  
138.12  
136.44  
131.09  
129.08  
127.15  
125.49  
124.35  
124.21  
123.99  
112.09  
109.80

82.43  
77.41  
77.16  
76.91

34.58  
30.50

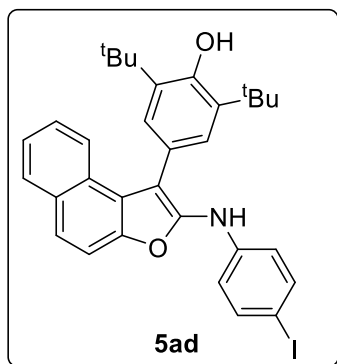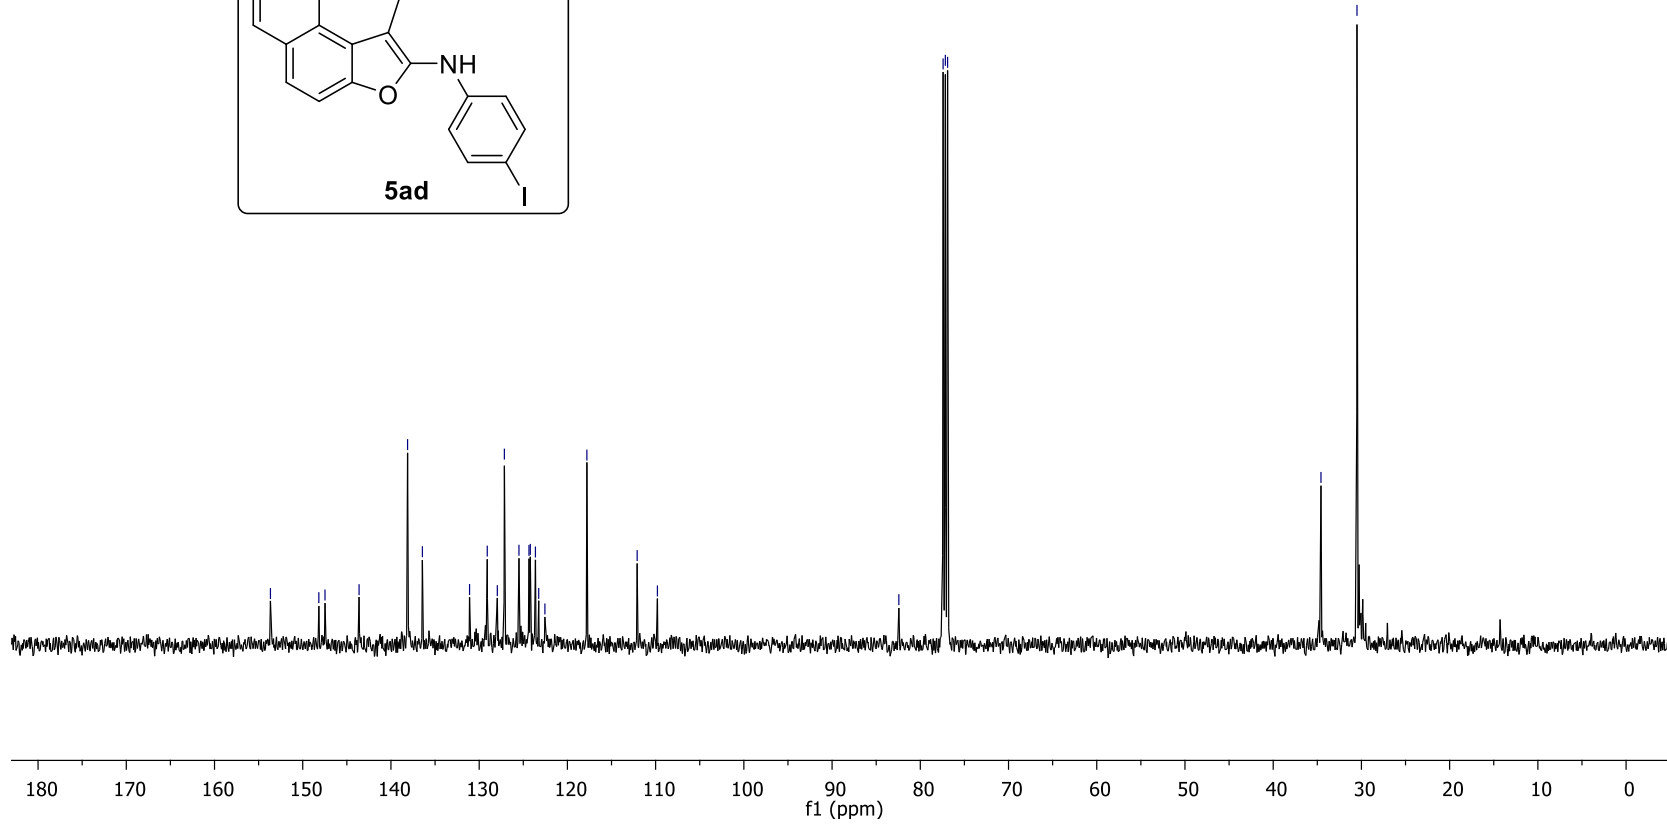

$^1\text{H}$  NMR of compound **5ae** in  $\text{CDCl}_3$

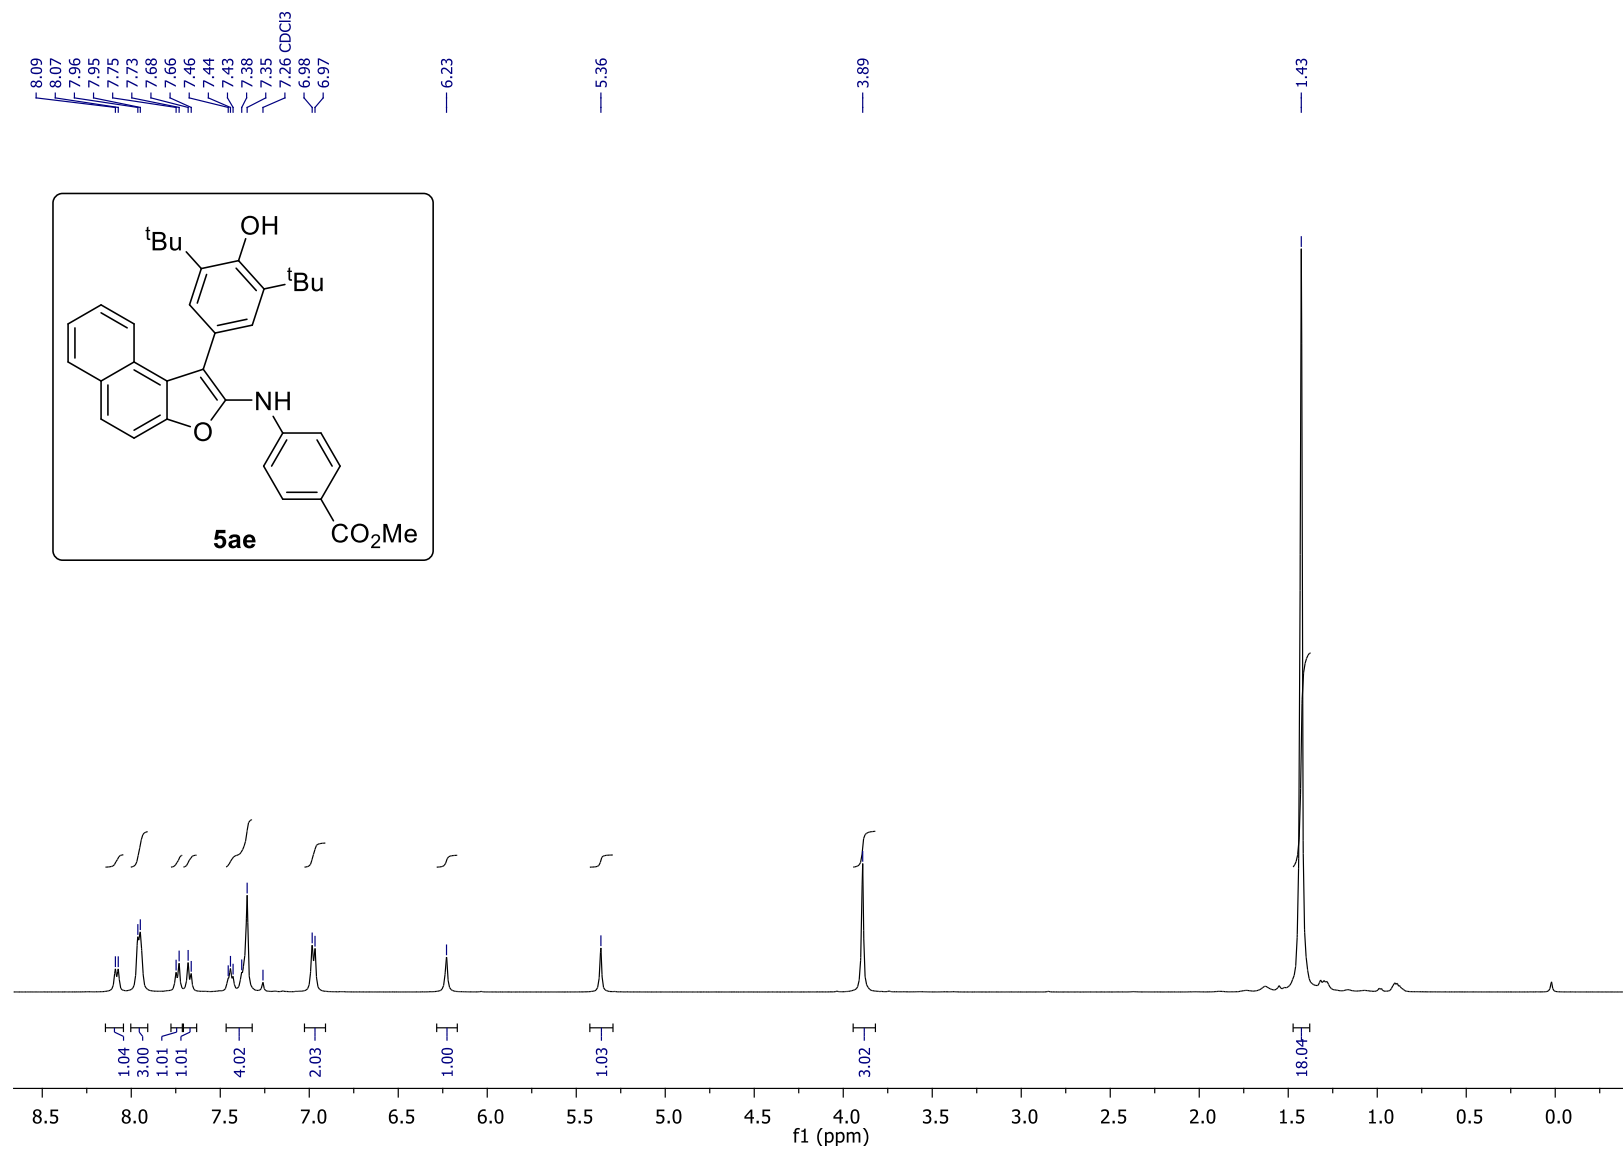

$^{13}\text{C}$  NMR of compound **5ae** in  $\text{CDCl}_3$

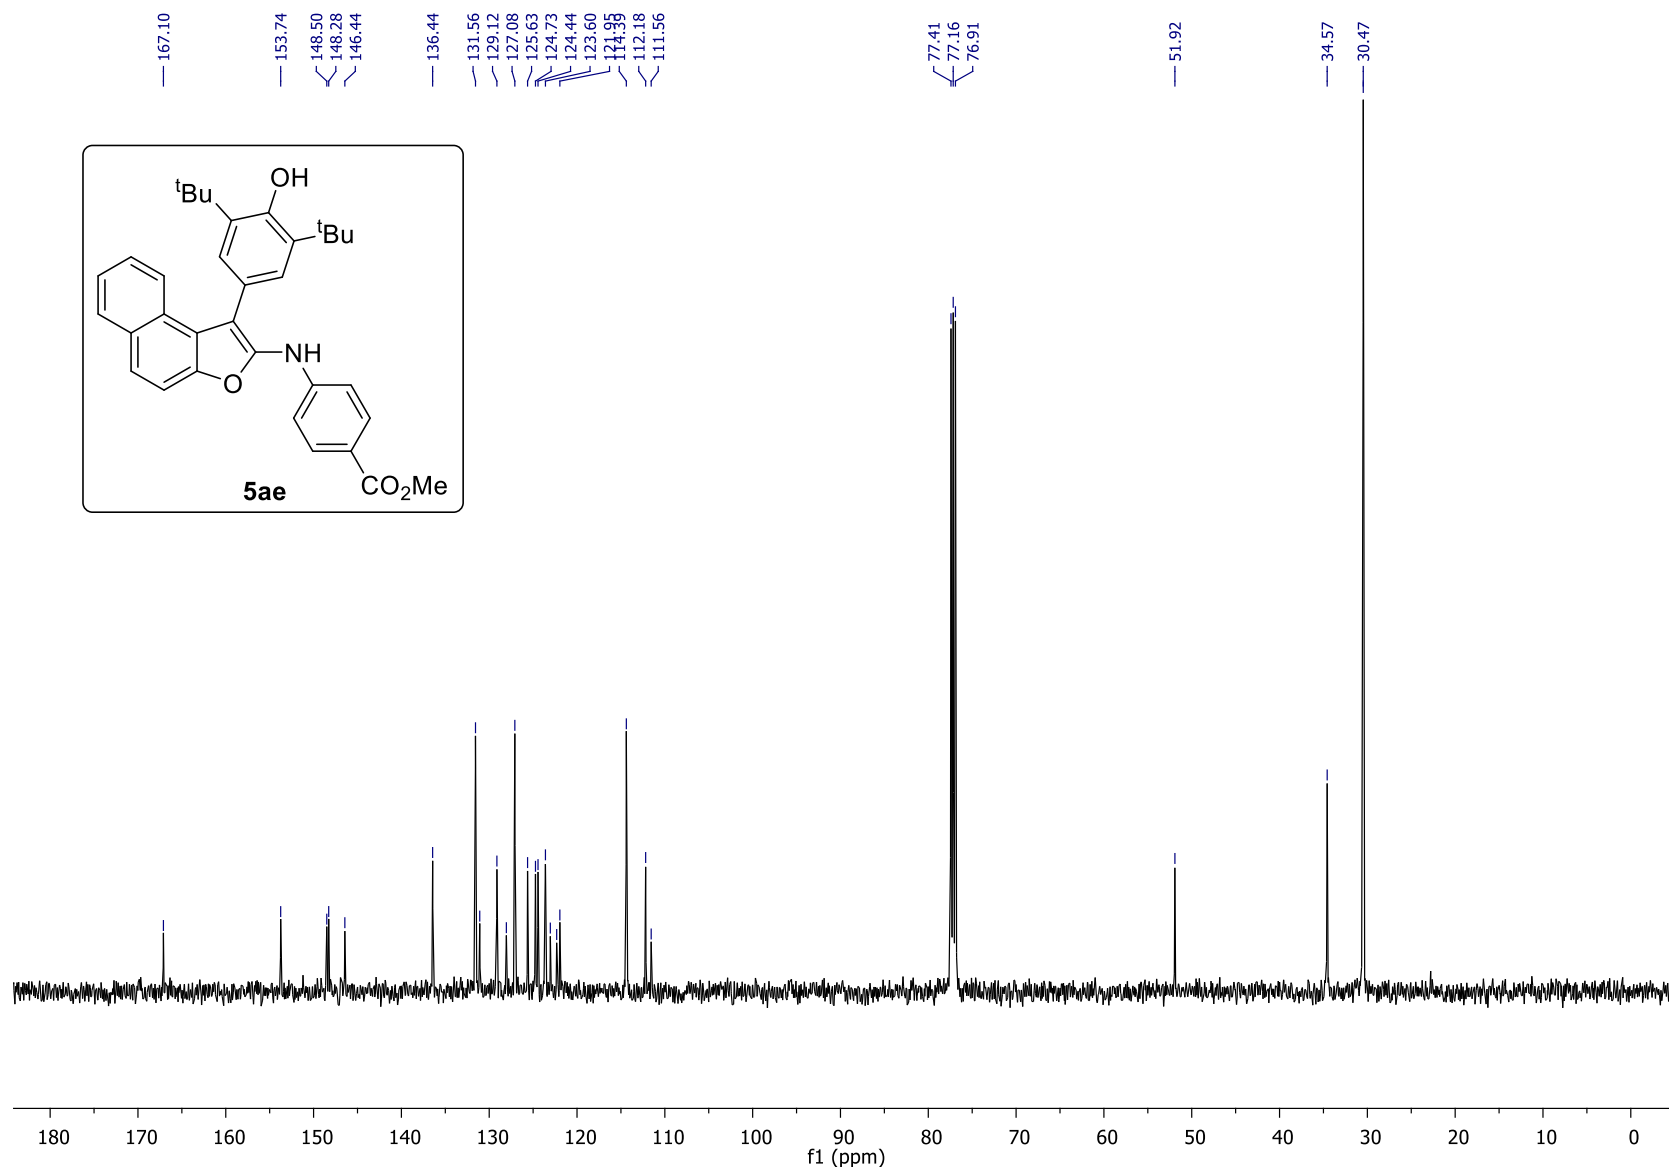



$^1\text{H}$  NMR of compound **5af** in  $\text{CDCl}_3$

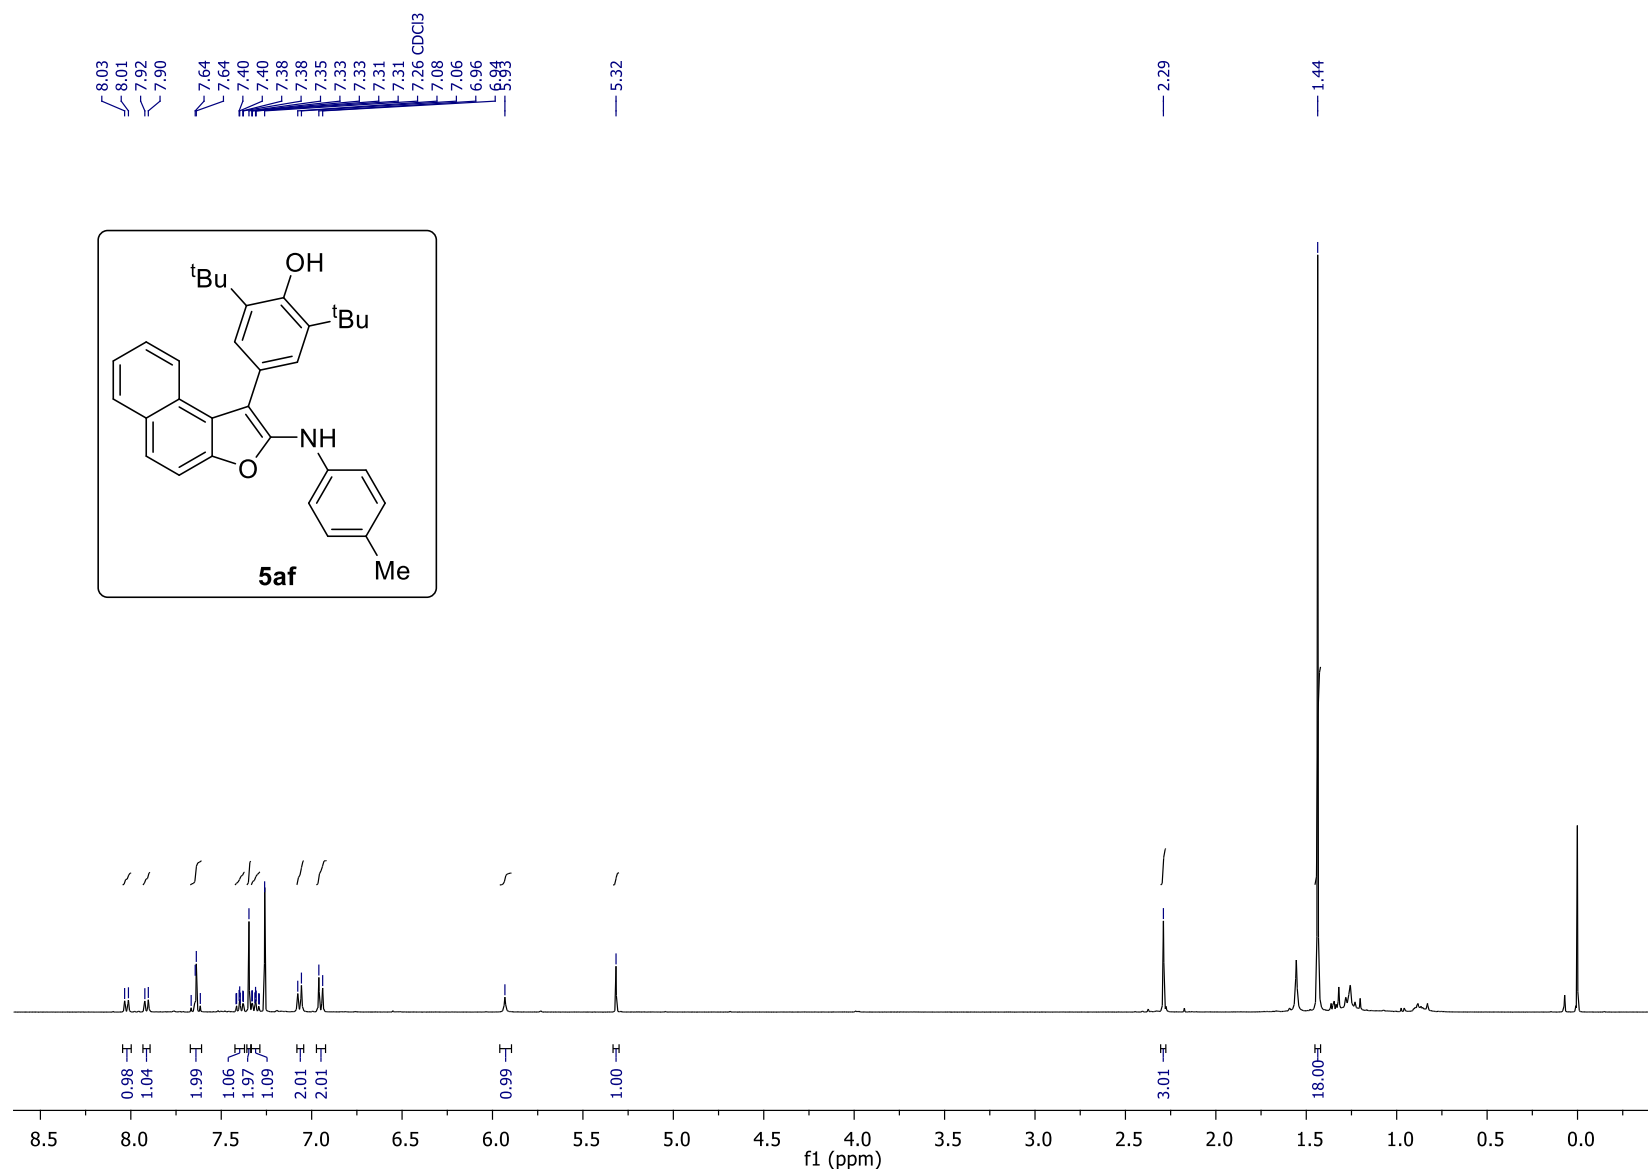

$^{13}\text{C}$  NMR of compound **5af** in  $\text{CDCl}_3$

153.50  
149.21  
147.78  
140.90  
136.39  
130.43  
129.91  
129.01  
127.28  
125.21  
124.17  
123.72  
122.30  
112.06  
107.20

77.41  
77.16  
76.91

34.59  
30.53

20.74

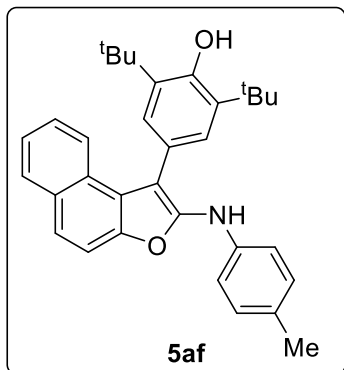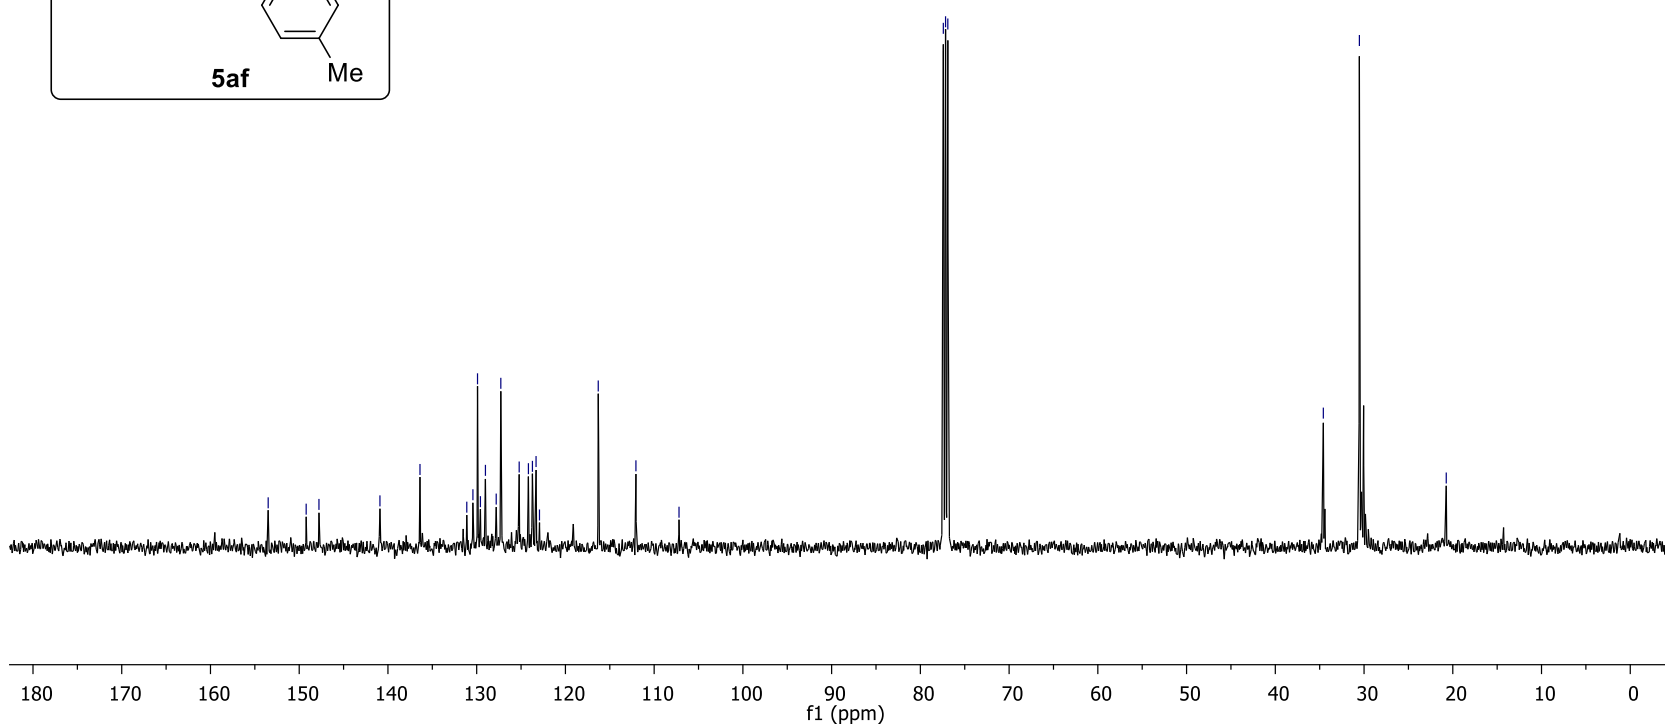

$^1\text{H}$  NMR of compound **5ag** in  $\text{CDCl}_3$

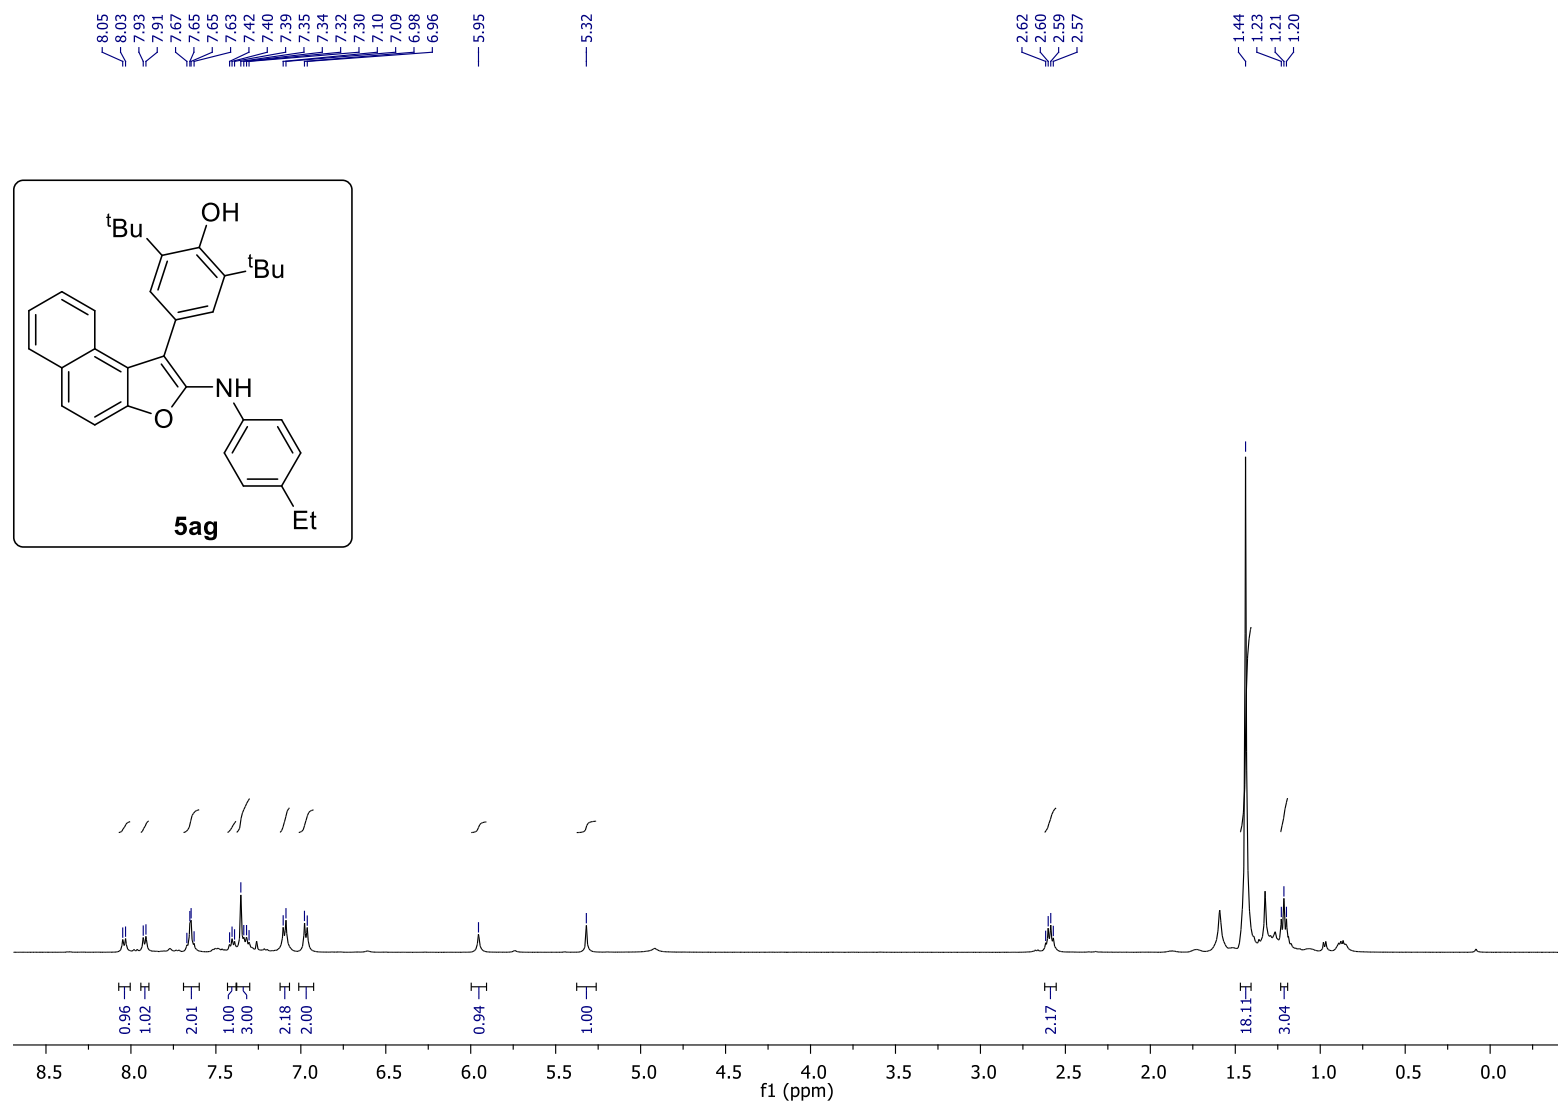

$^{13}\text{C}$  NMR of compound **5ag** in  $\text{CDCl}_3$

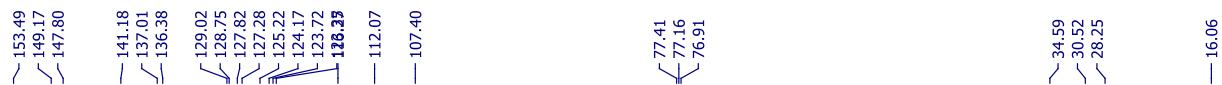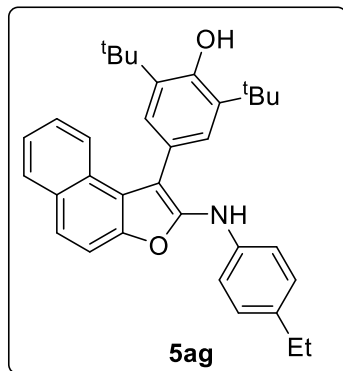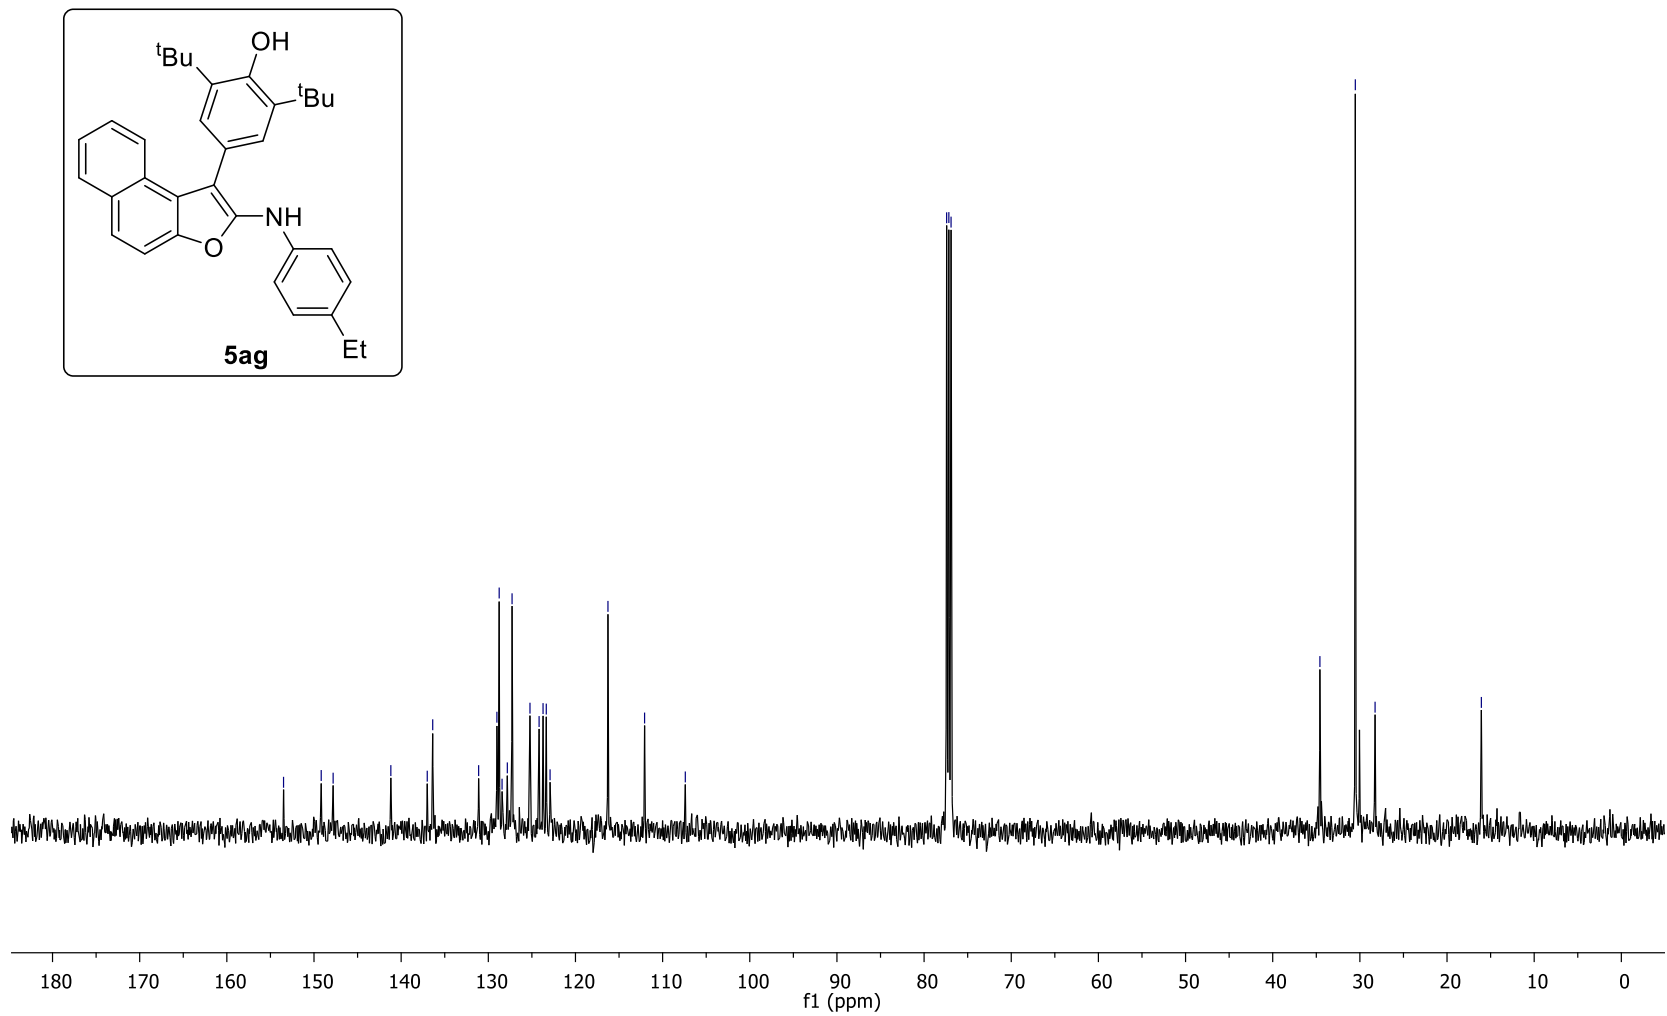

$^1\text{H}$  NMR of compound **5ah** in  $\text{CDCl}_3$

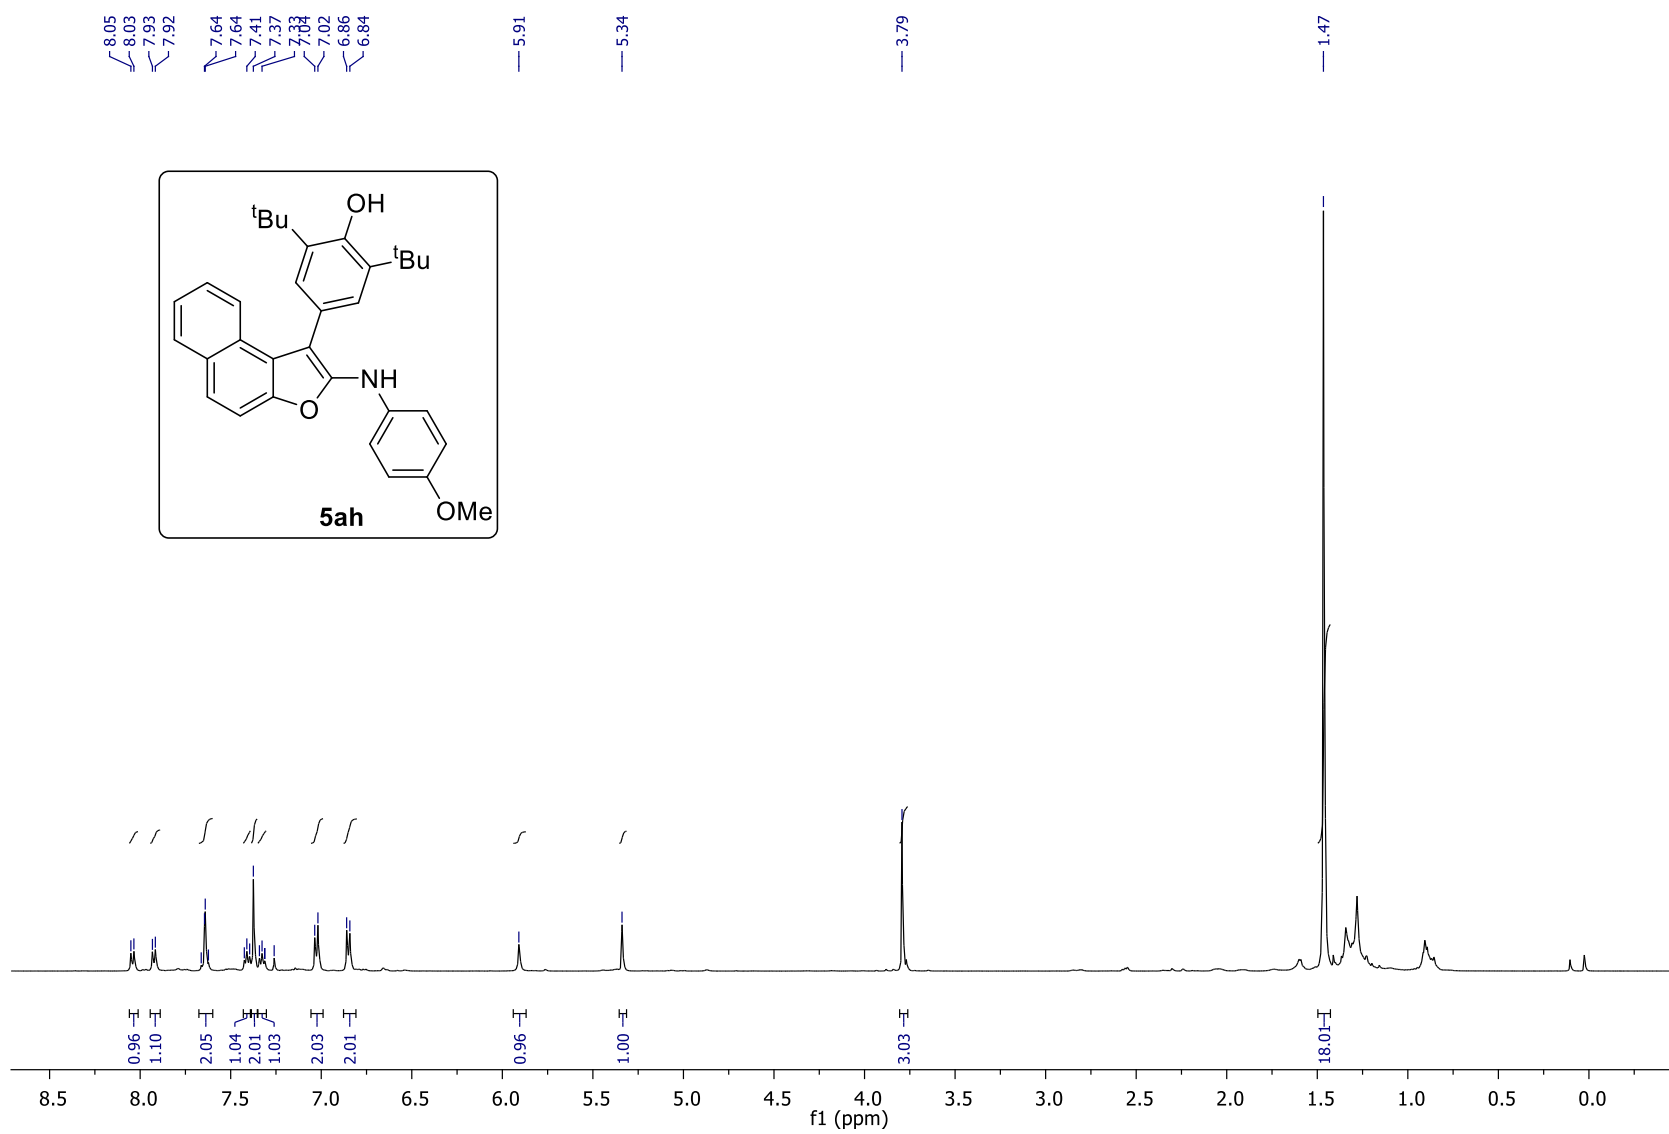

$^{13}\text{C}$  NMR of compound **5ah** in  $\text{CDCl}_3$

154.66  
153.47  
149.78  
147.57  
136.66  
136.42  
129.00  
127.30  
125.15  
124.15  
123.73  
123.08  
118.71  
114.81  
111.98  
106.04  
77.41  
77.16  
76.91  
55.80  
34.59  
30.53

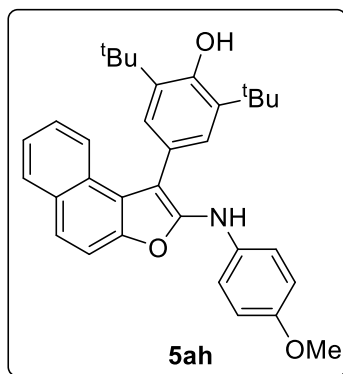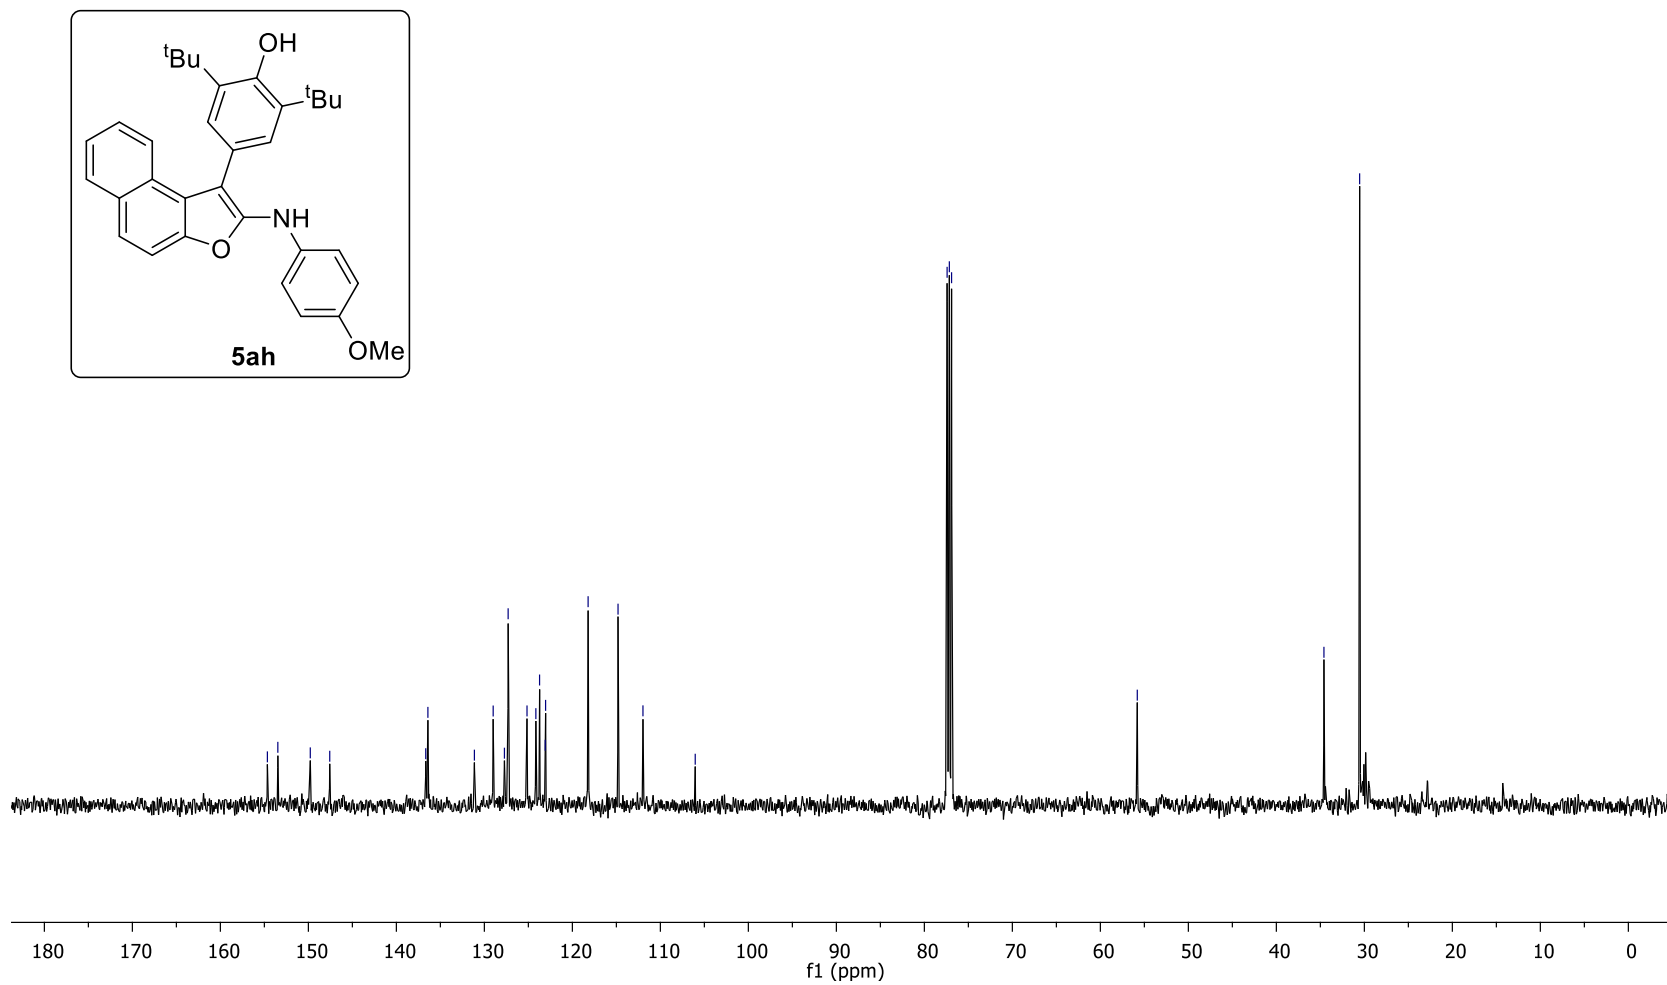

$^1\text{H}$  NMR of compound **5ai** in  $\text{CDCl}_3$

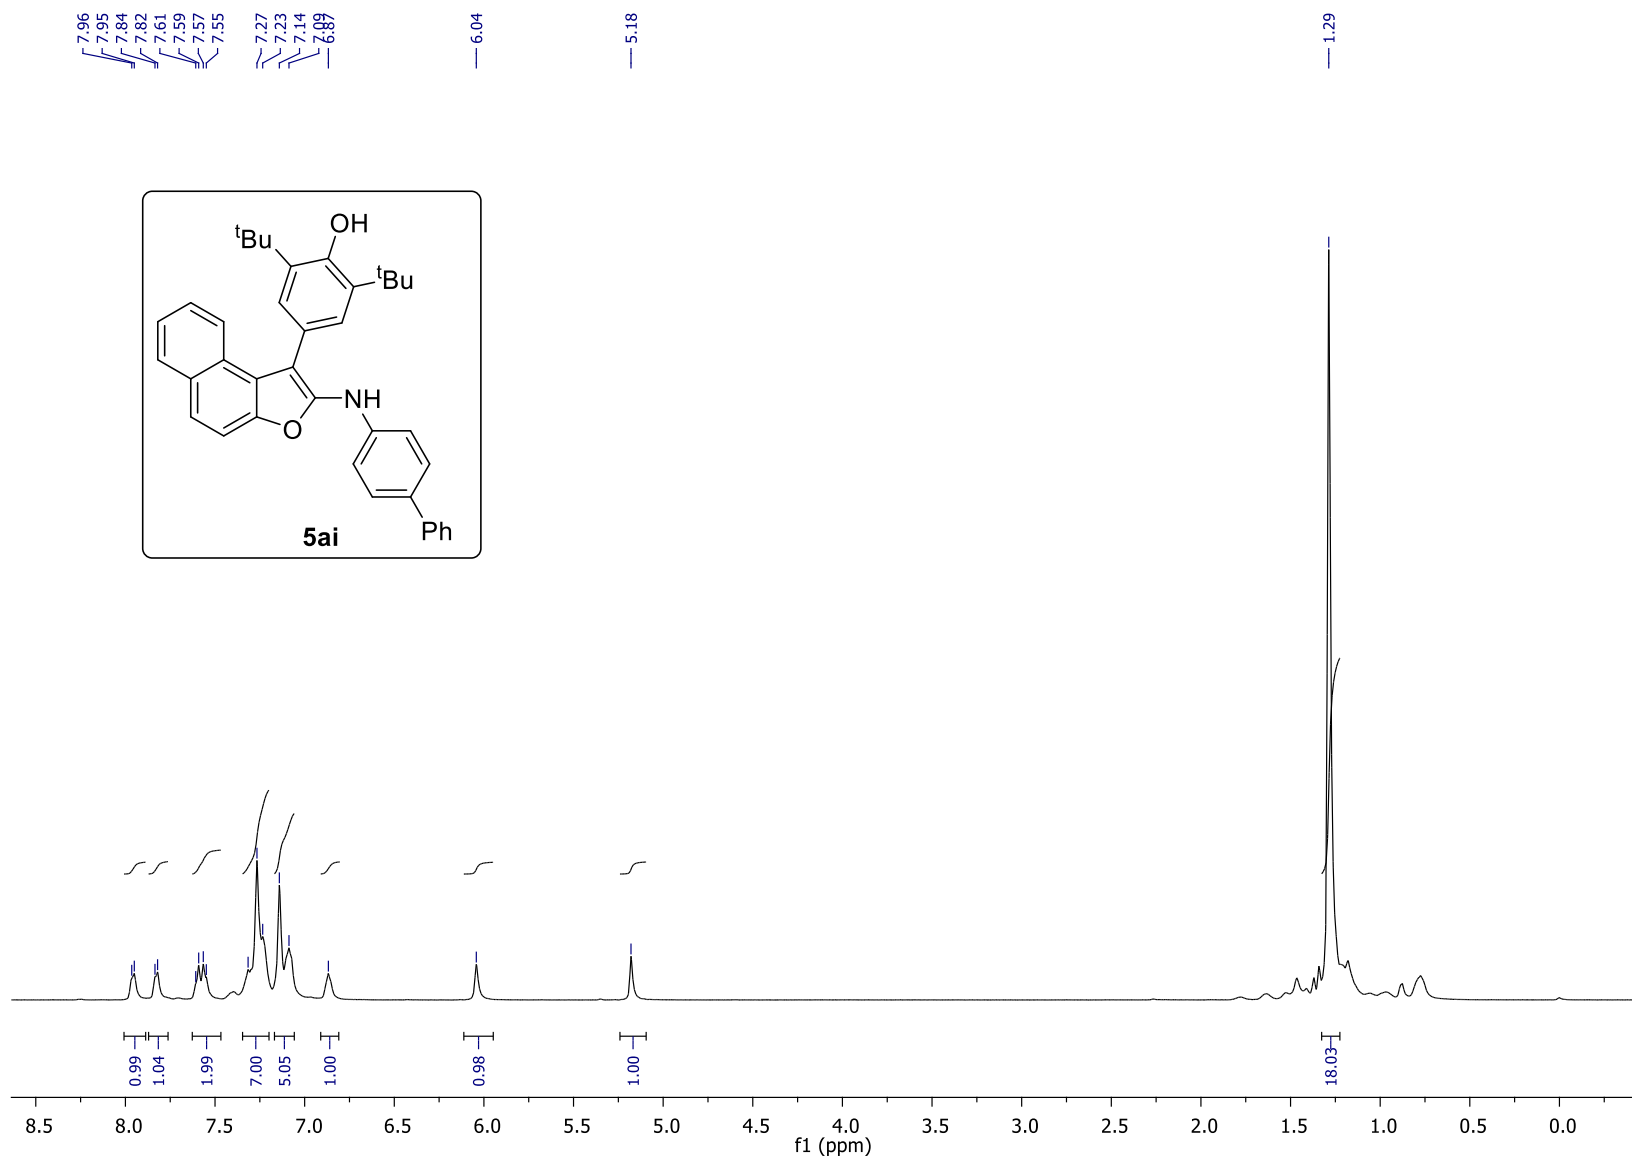

$^{13}\text{C}$  NMR of compound **5ai** in  $\text{CDCl}_3$

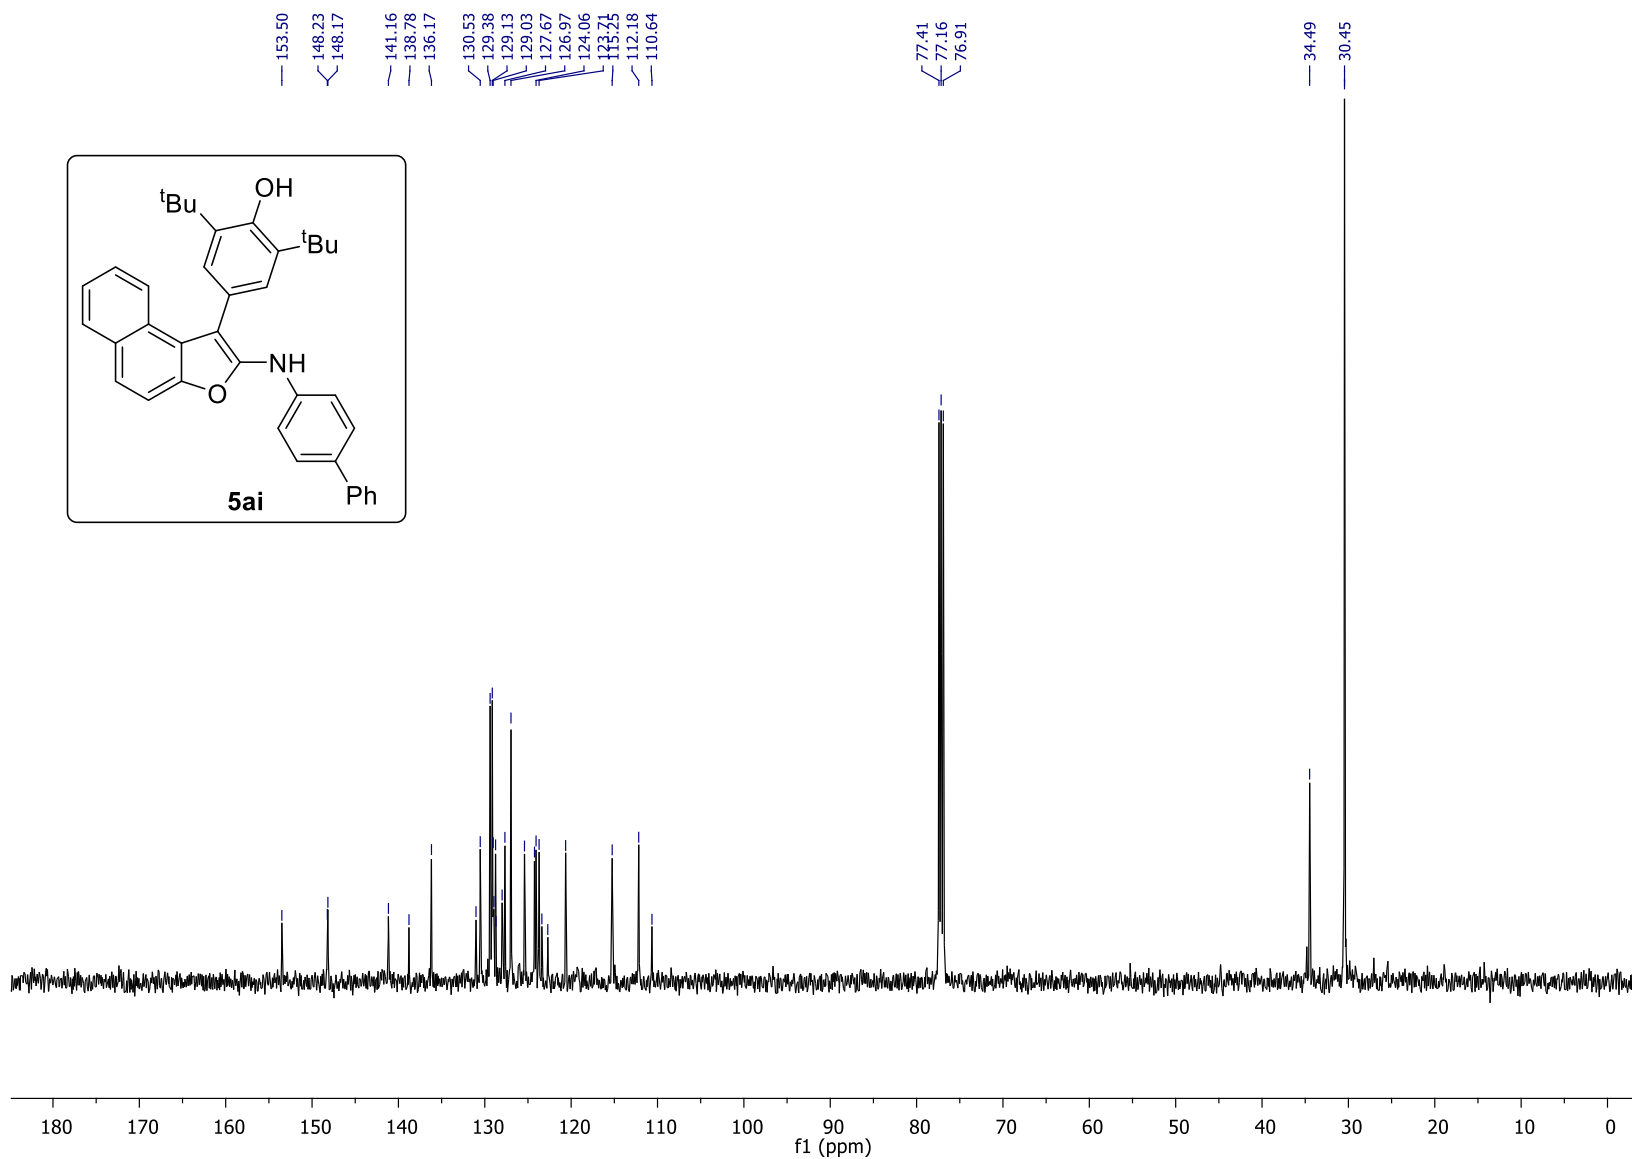



$^1\text{H}$  NMR of compound **5aj** in  $\text{CDCl}_3$

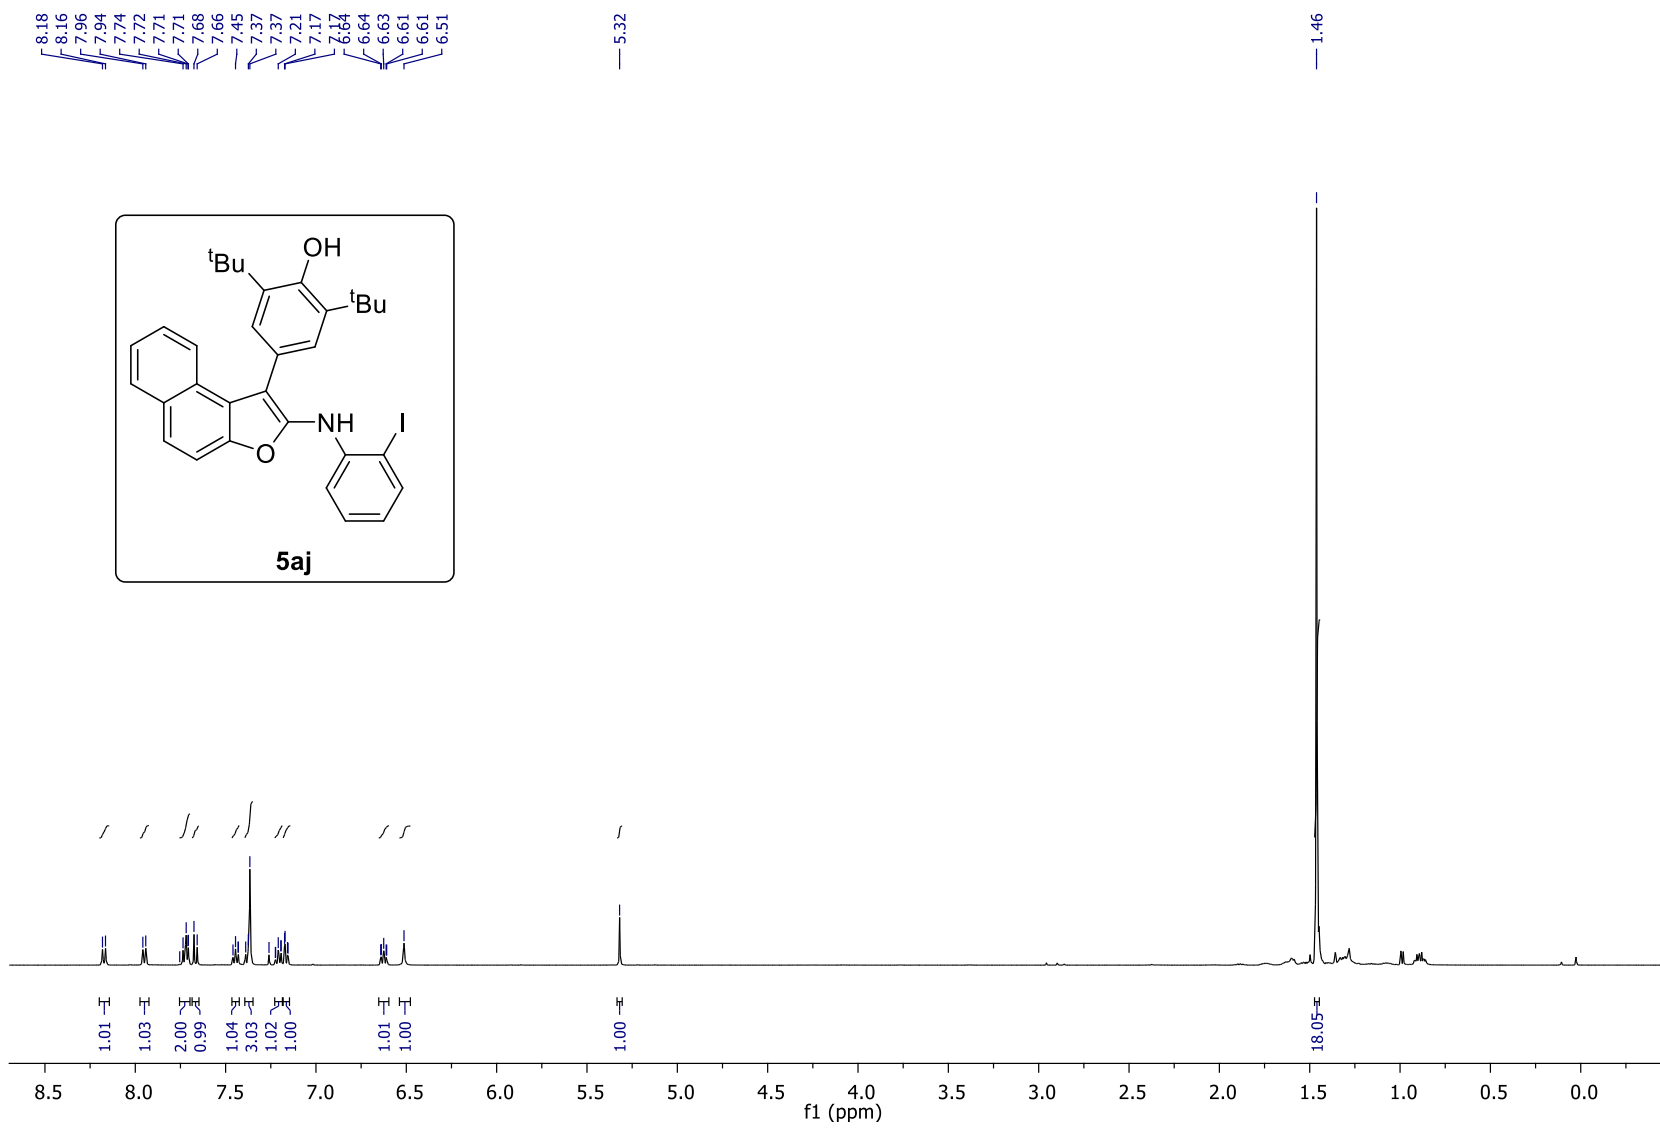

$^{13}\text{C}$  NMR of compound **5aj** in  $\text{CDCl}_3$

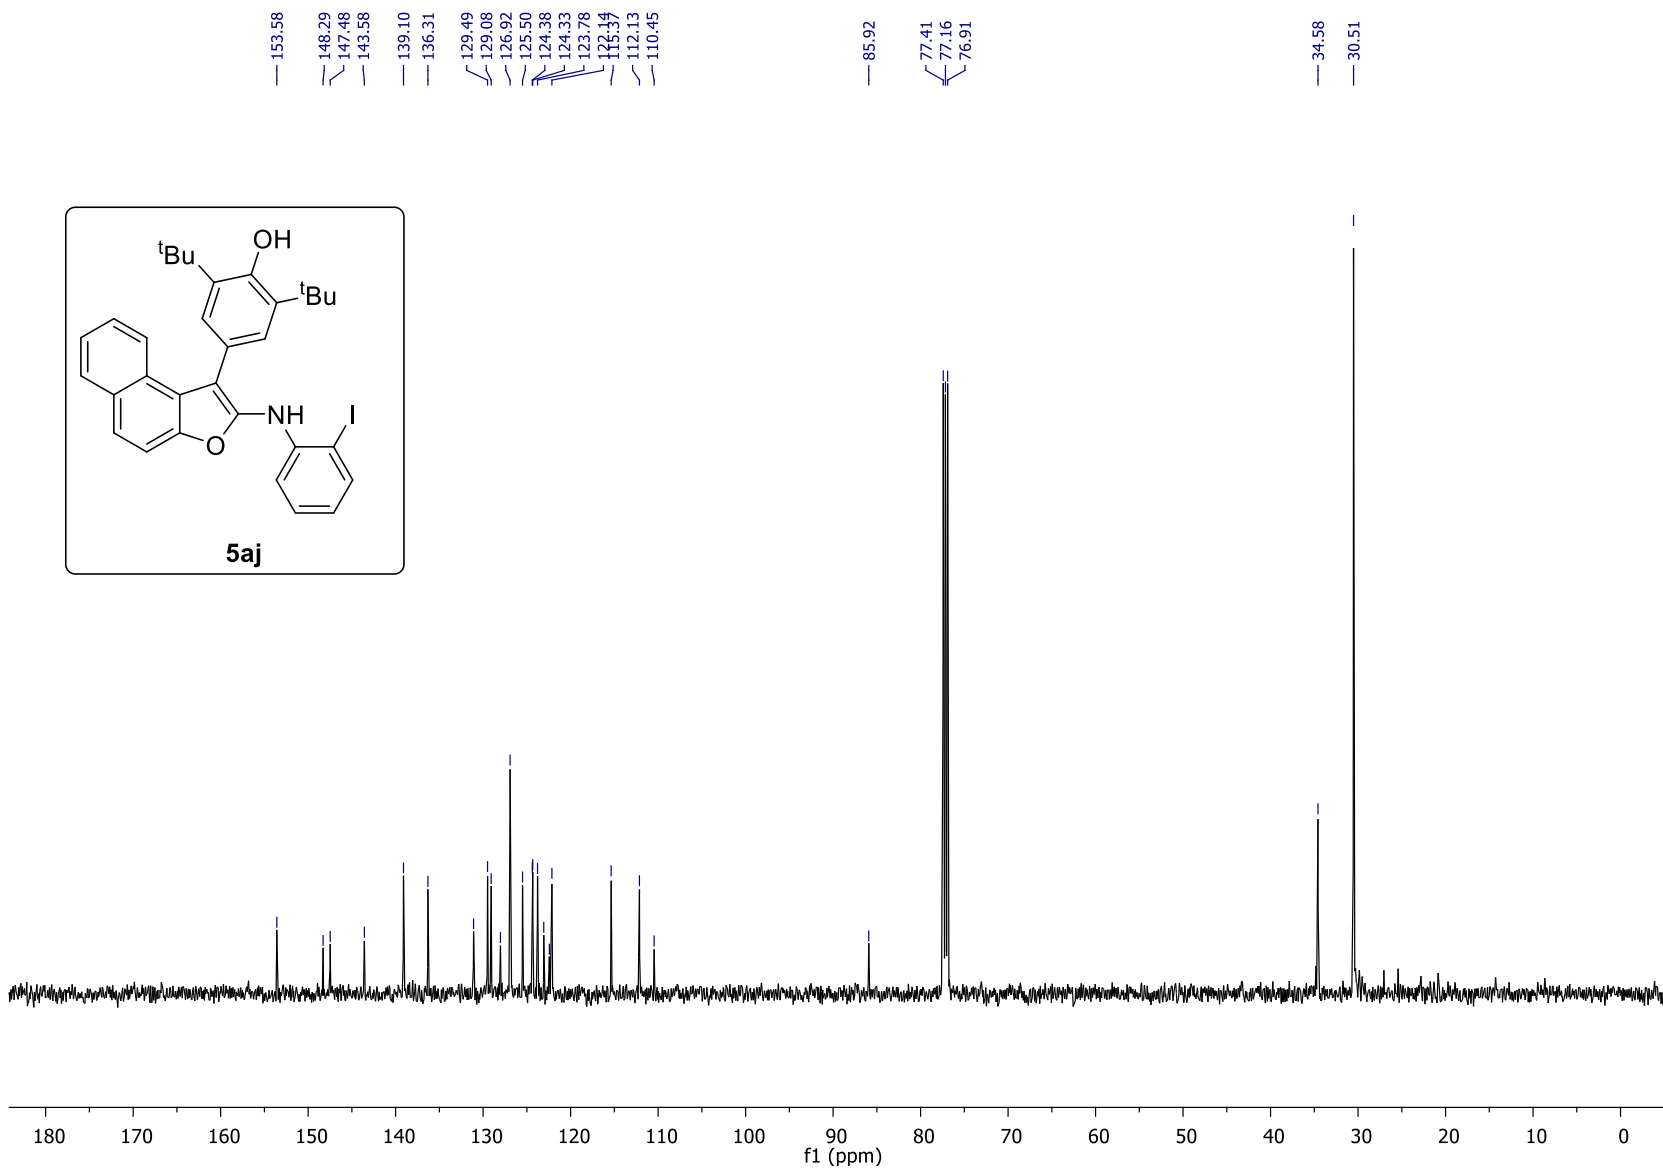

$^1\text{H}$  NMR of compound **5ak** in  $\text{CDCl}_3$

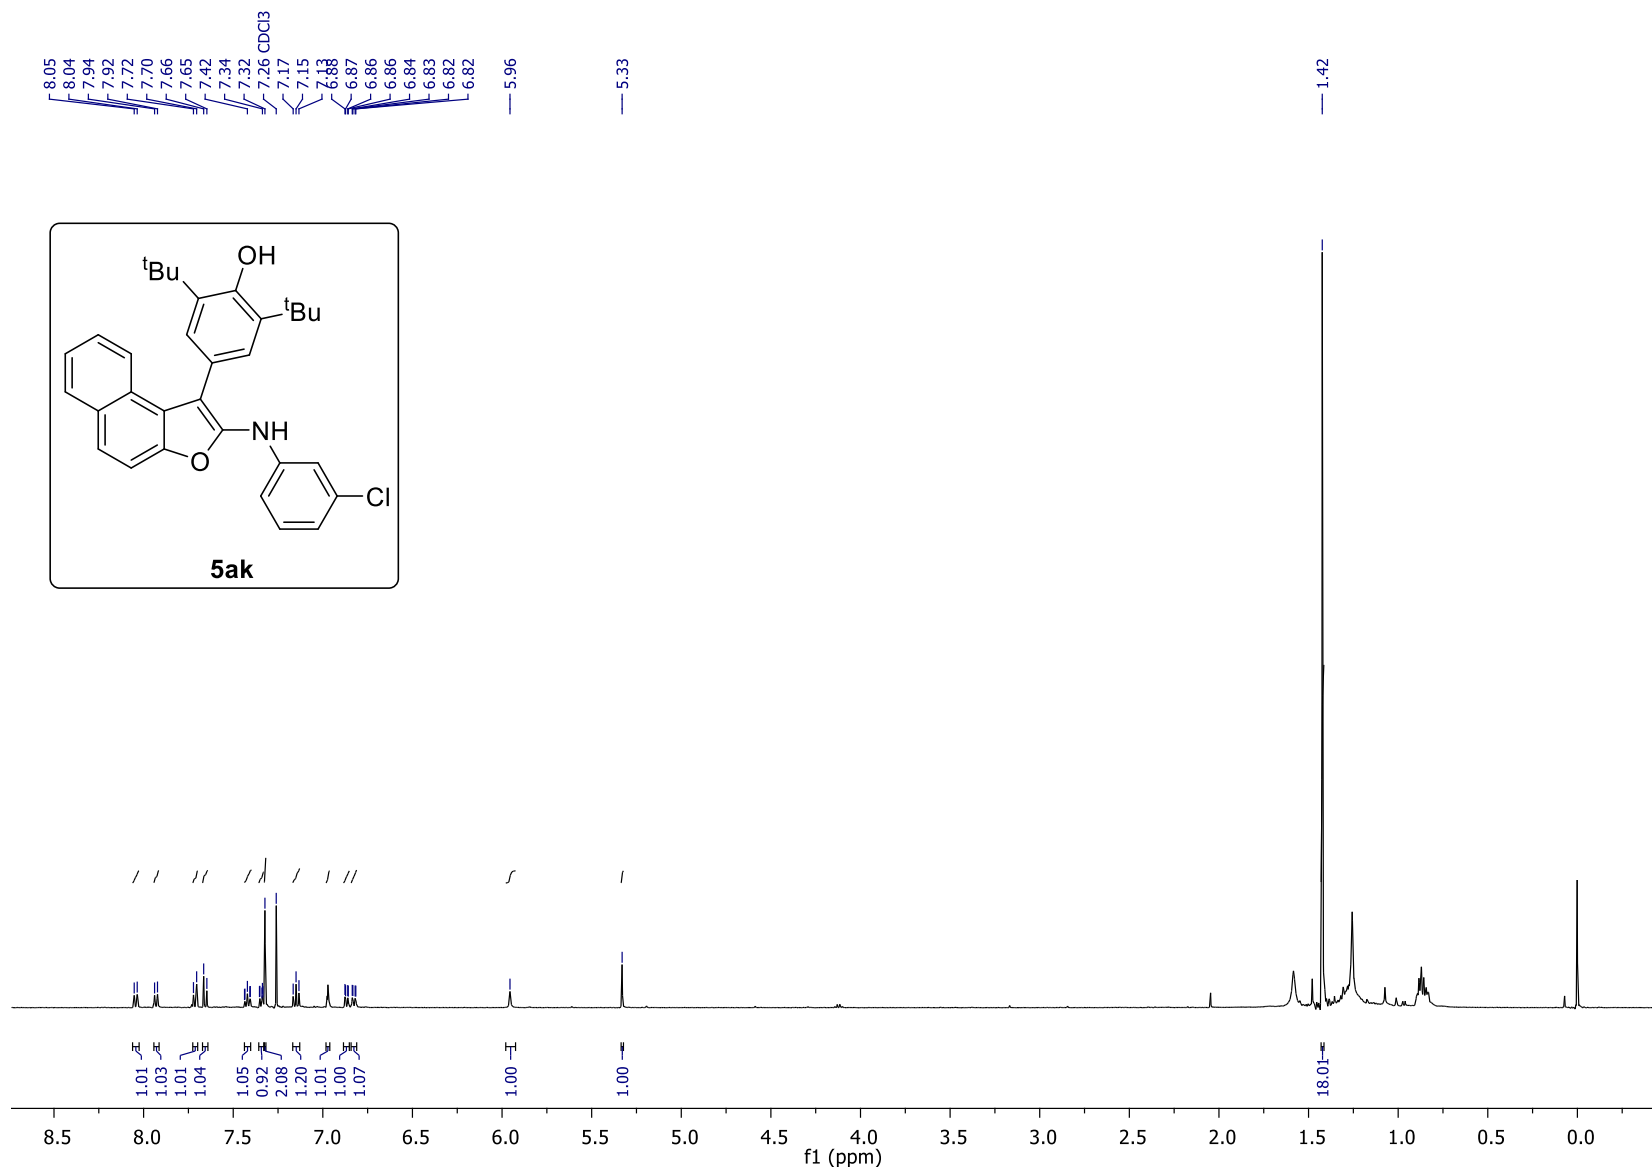

$^{13}\text{C}$  NMR of compound **5ak** in  $\text{CDCl}_3$

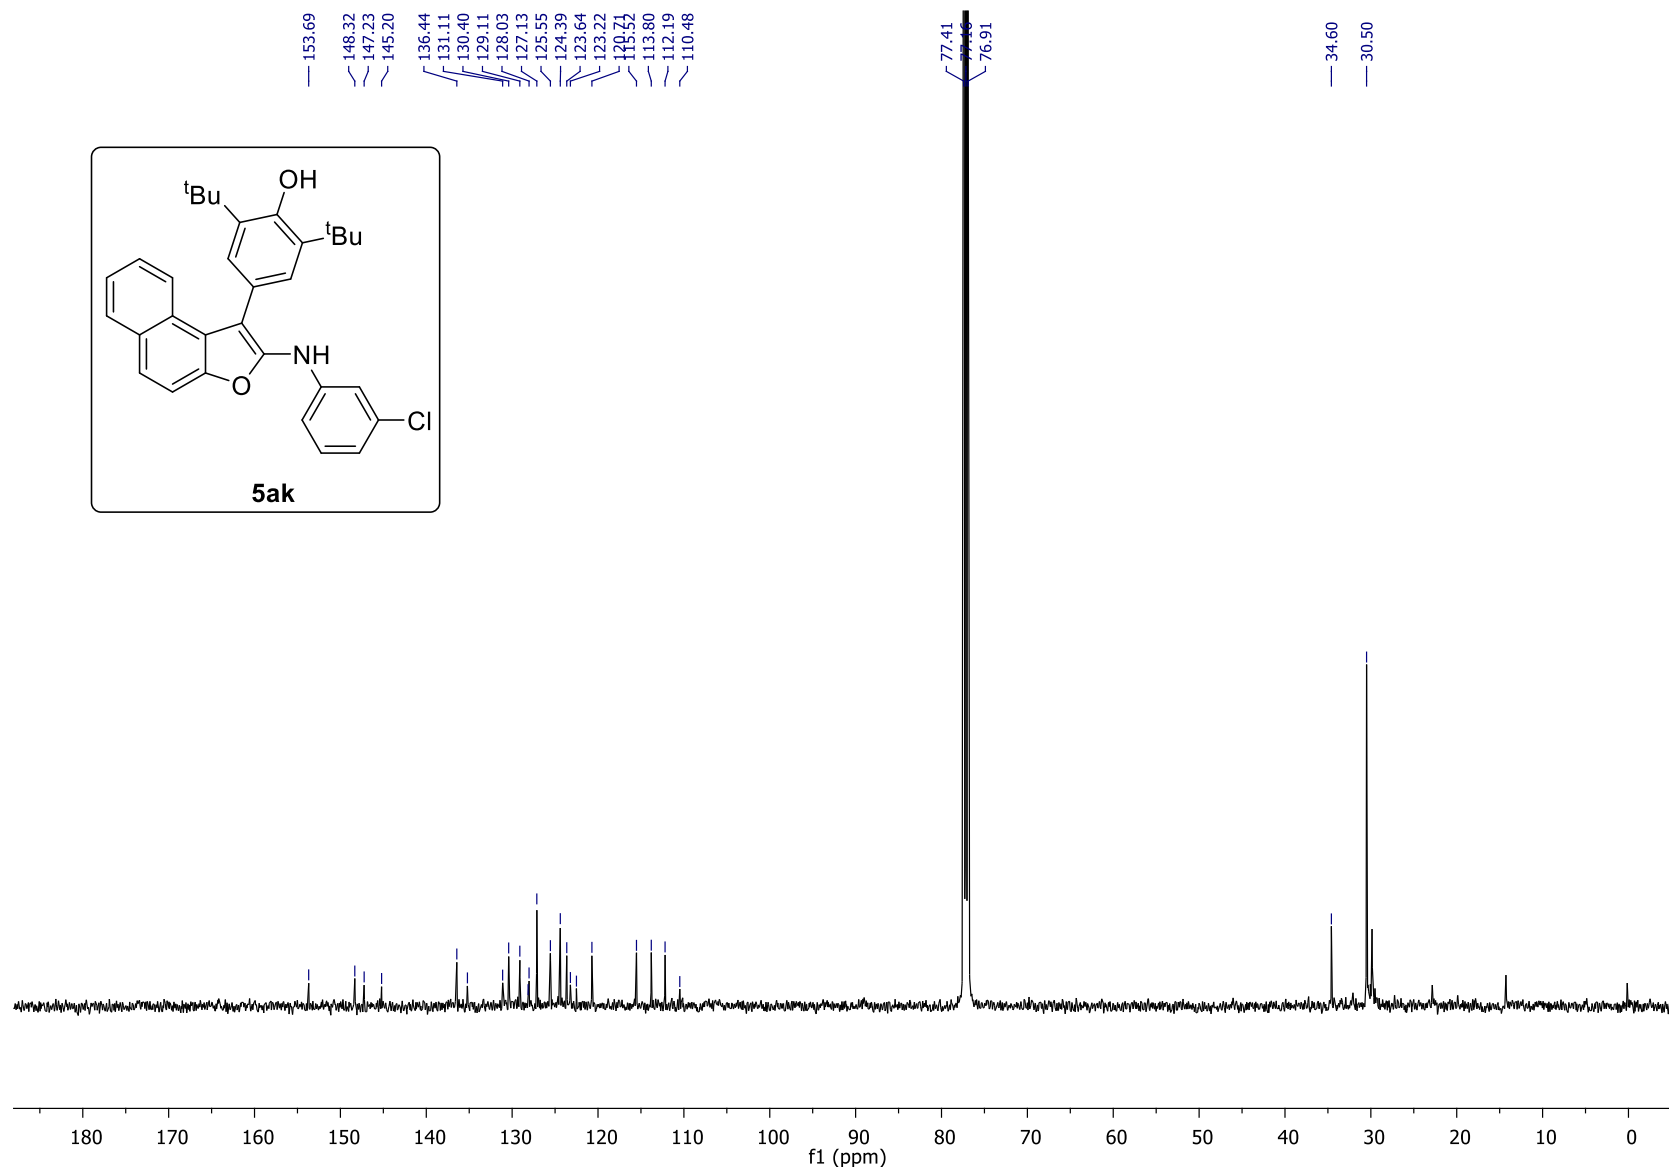

$^1\text{H}$  NMR of compound **5al** in  $\text{CDCl}_3$

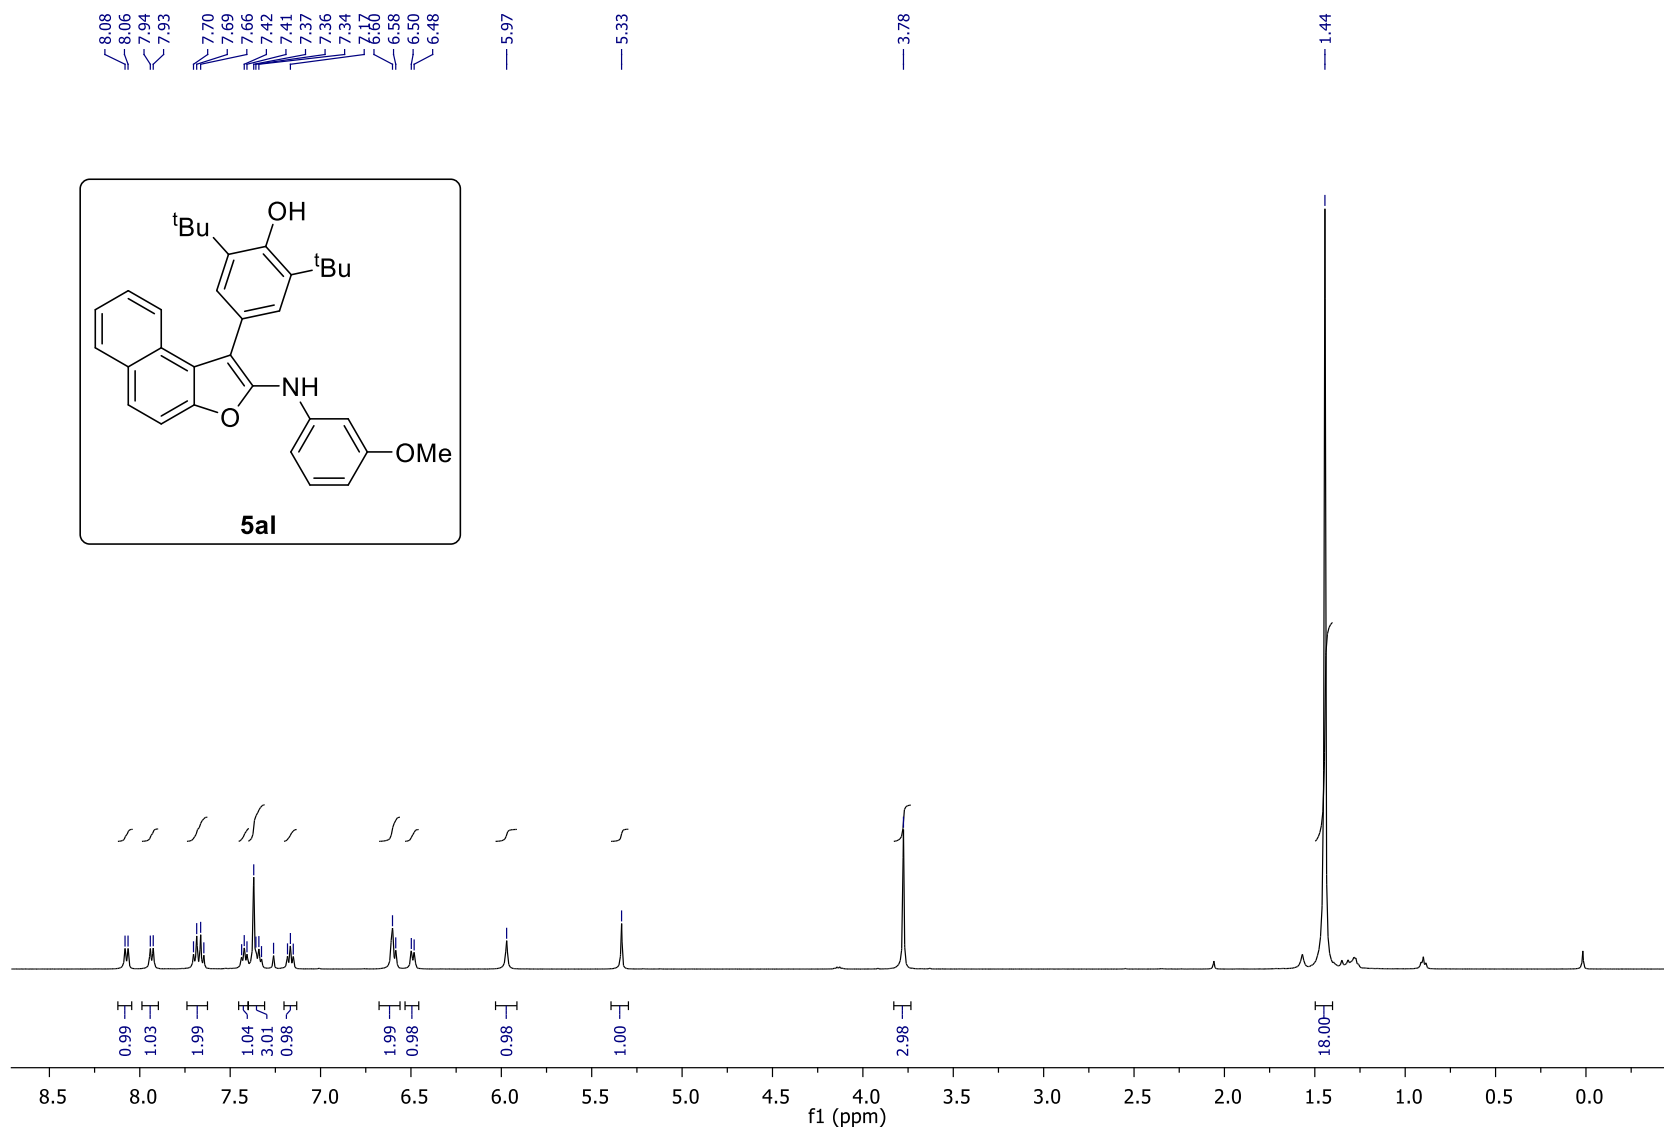

$^{13}\text{C}$  NMR of compound **5al** in  $\text{CDCl}_3$

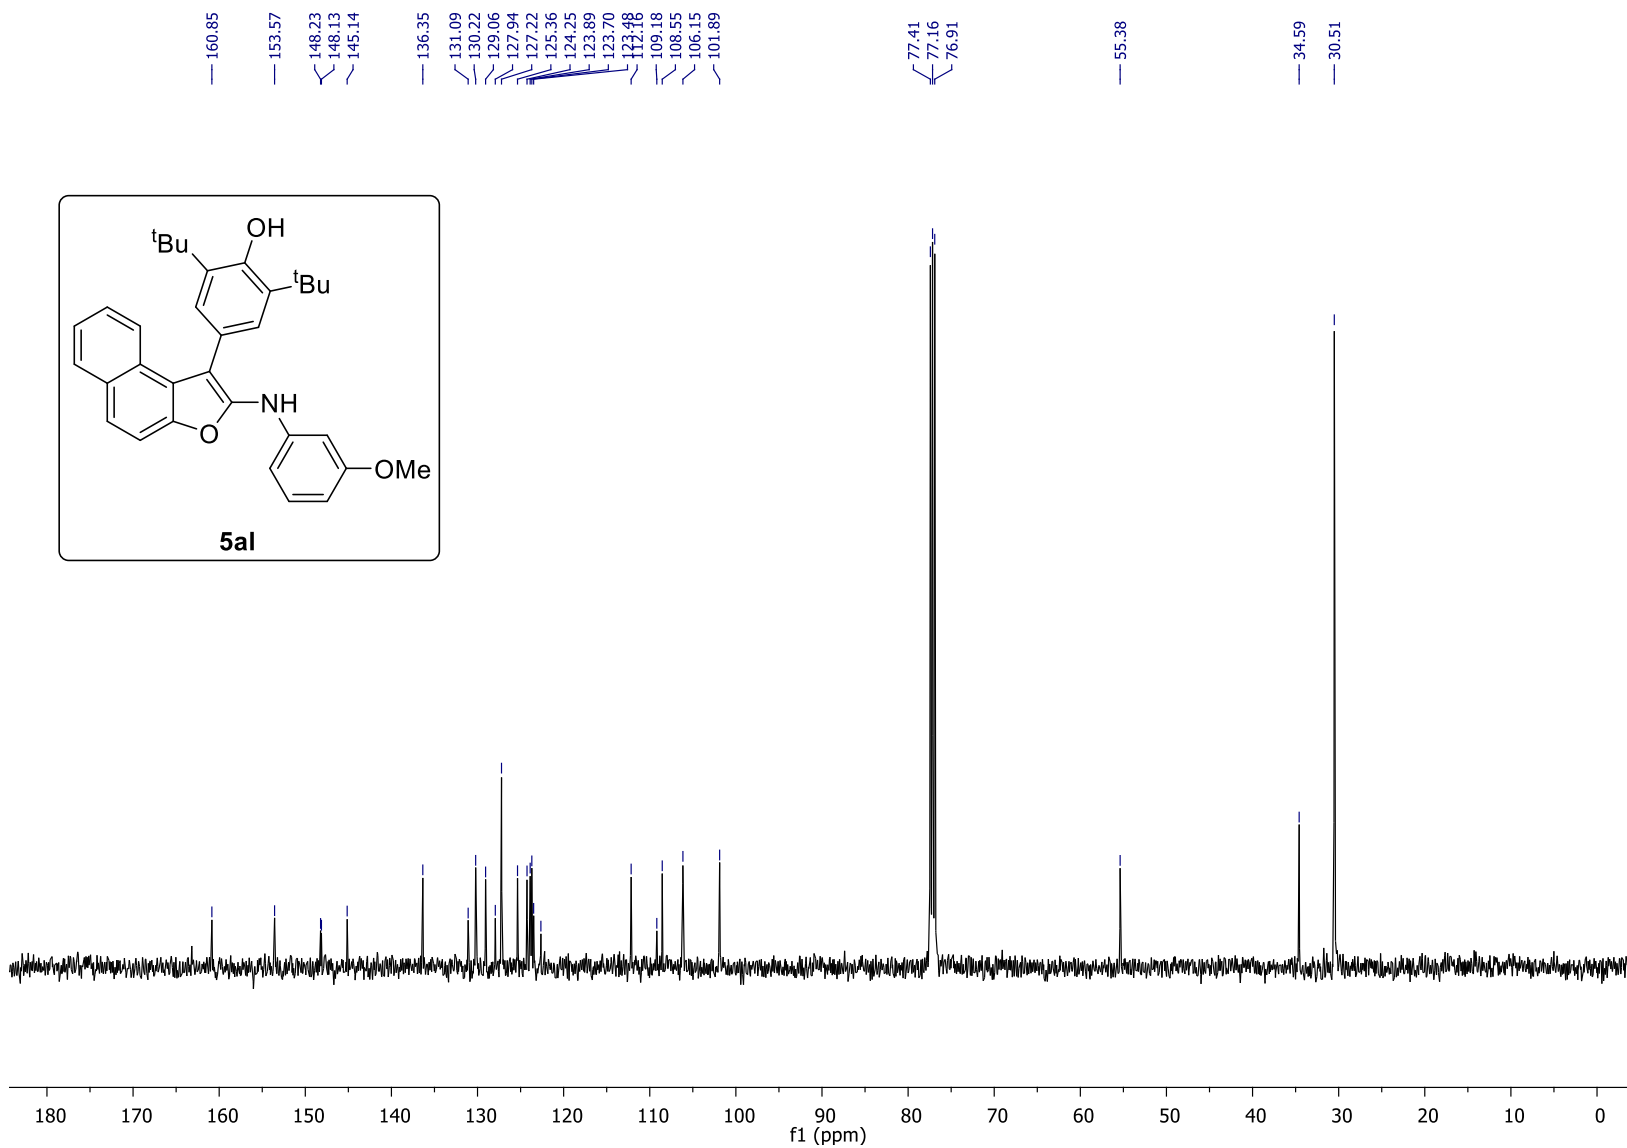

$^1\text{H}$  NMR of compound **5am** in  $\text{CDCl}_3$

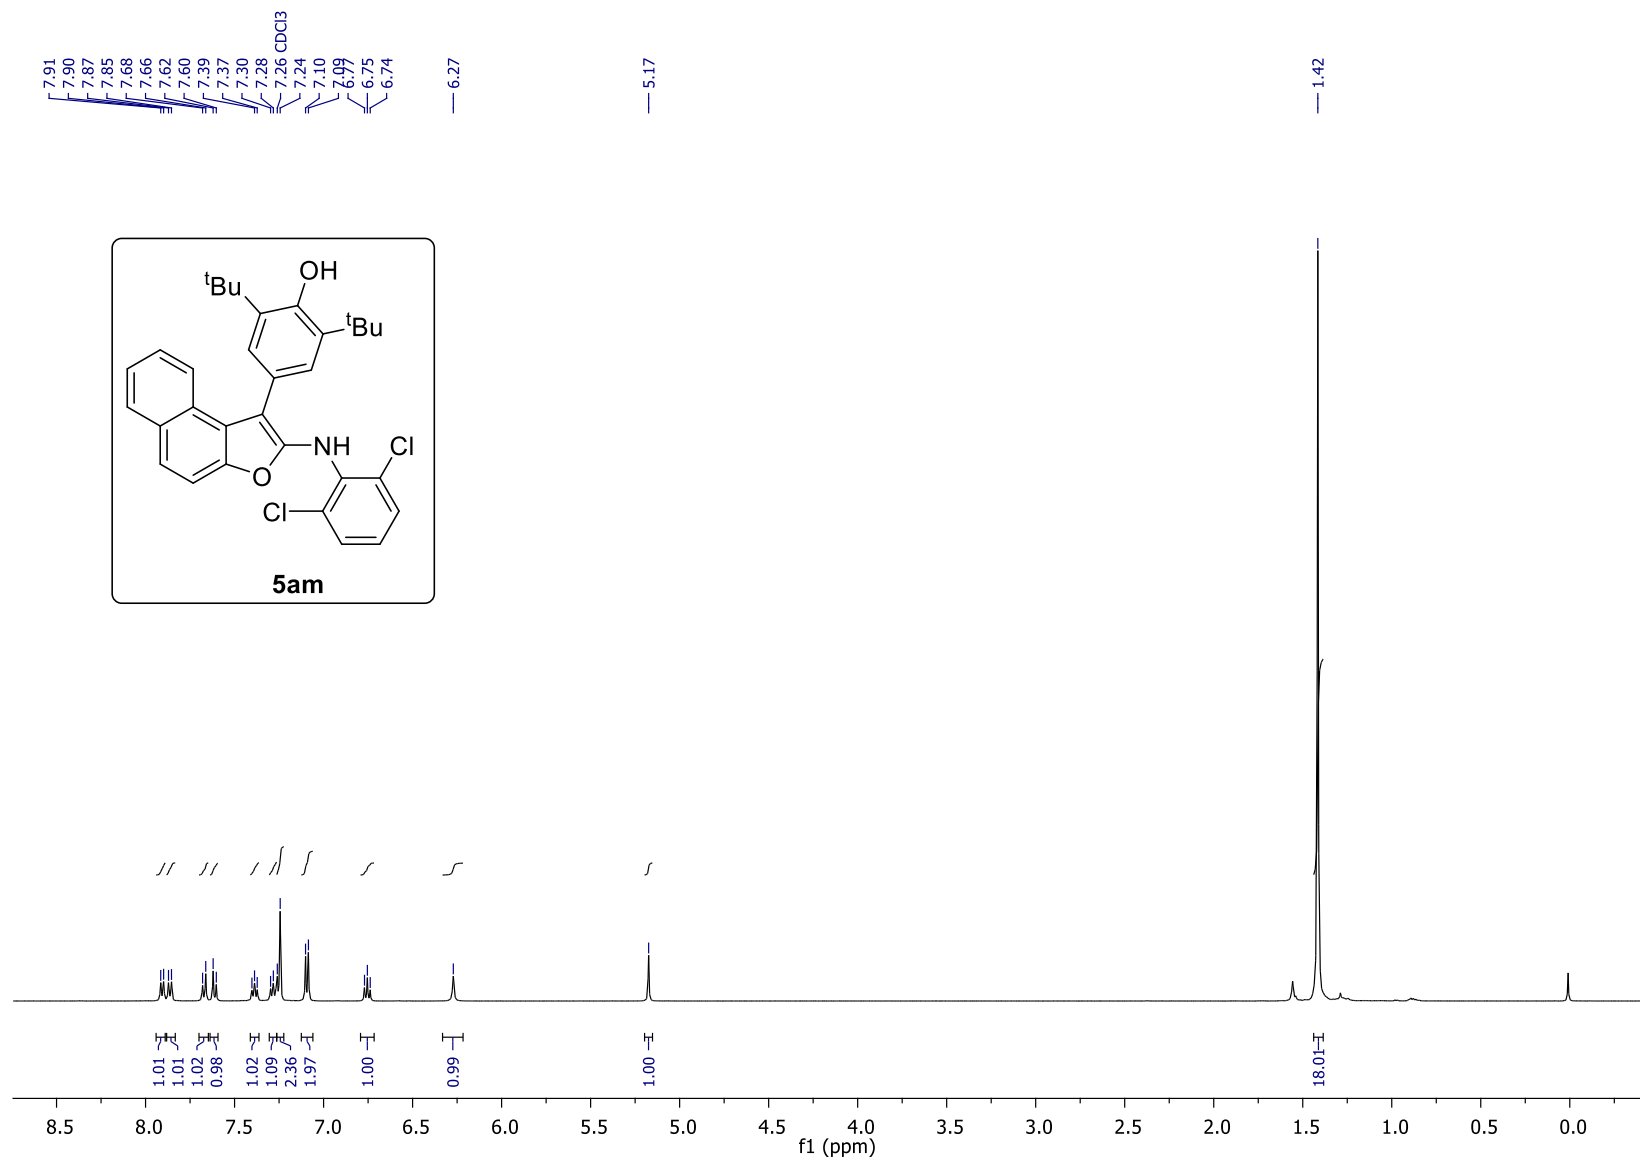

$^{13}\text{C}$  NMR of compound **5am** in  $\text{CDCl}_3$

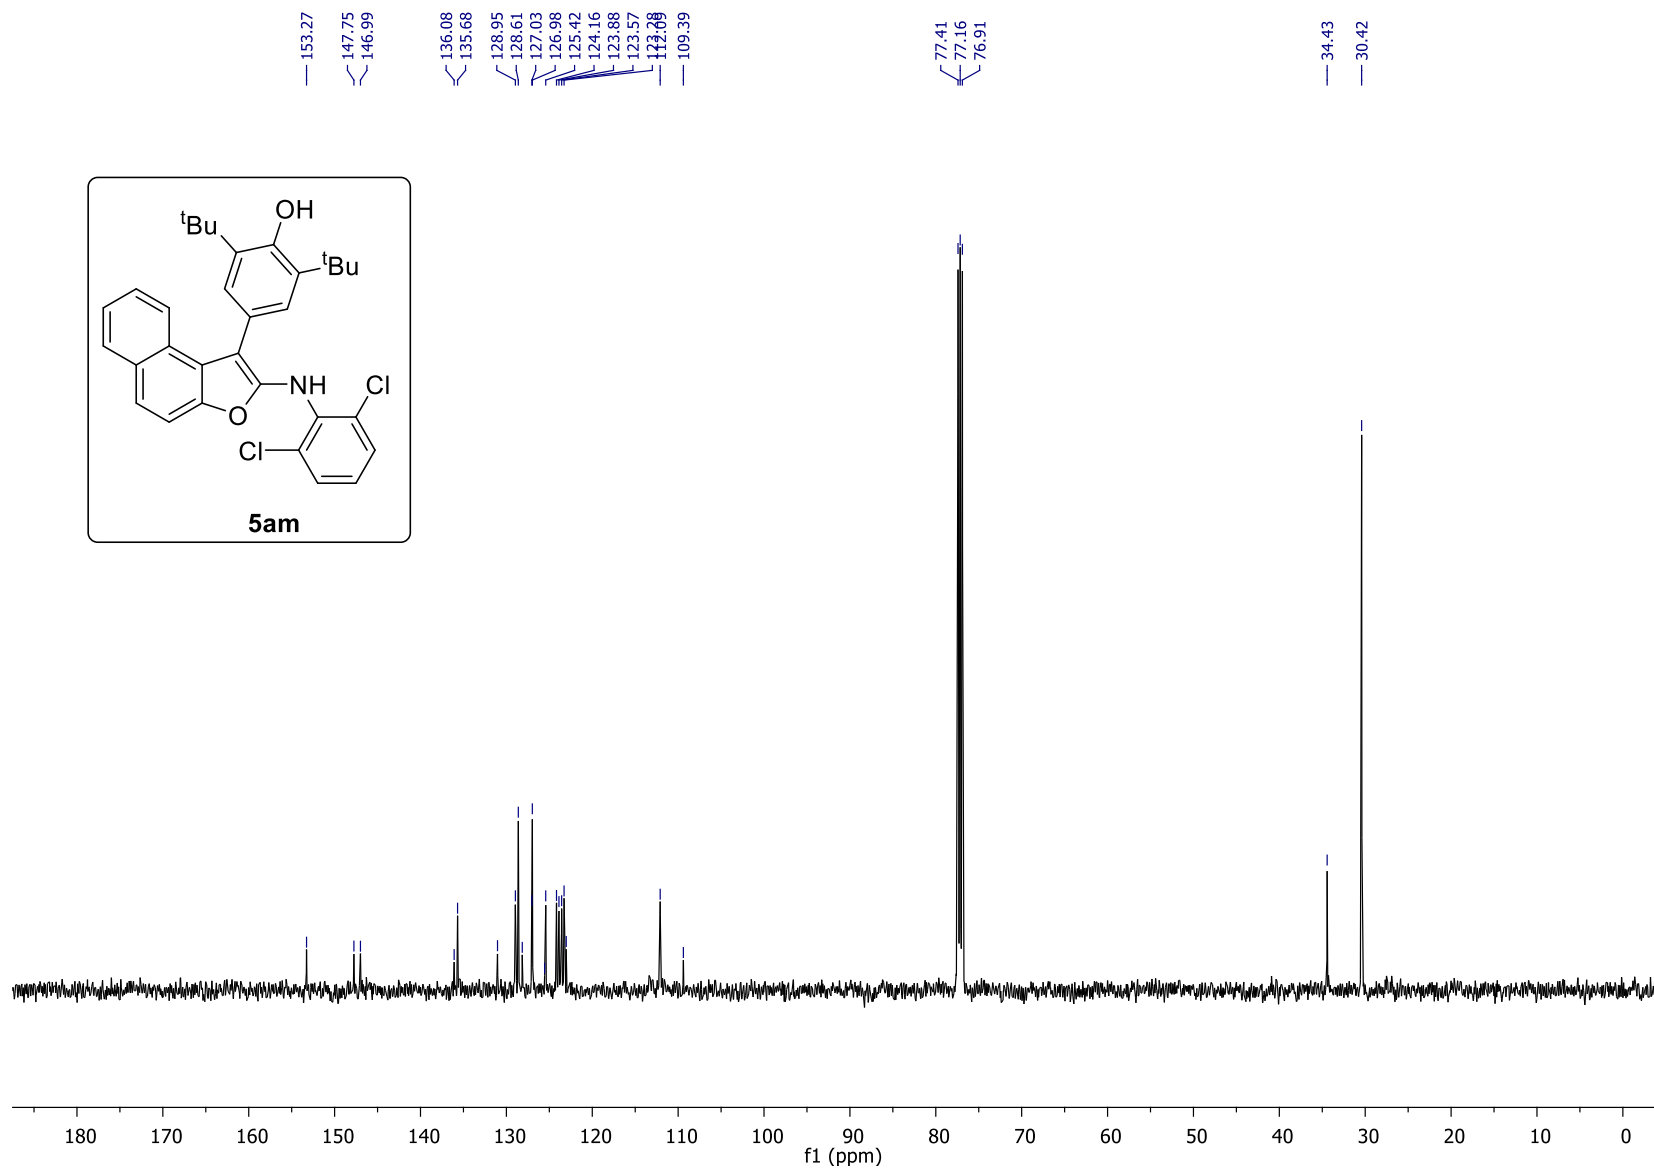



$^1\text{H}$  NMR of compound **5an** in  $\text{CDCl}_3$

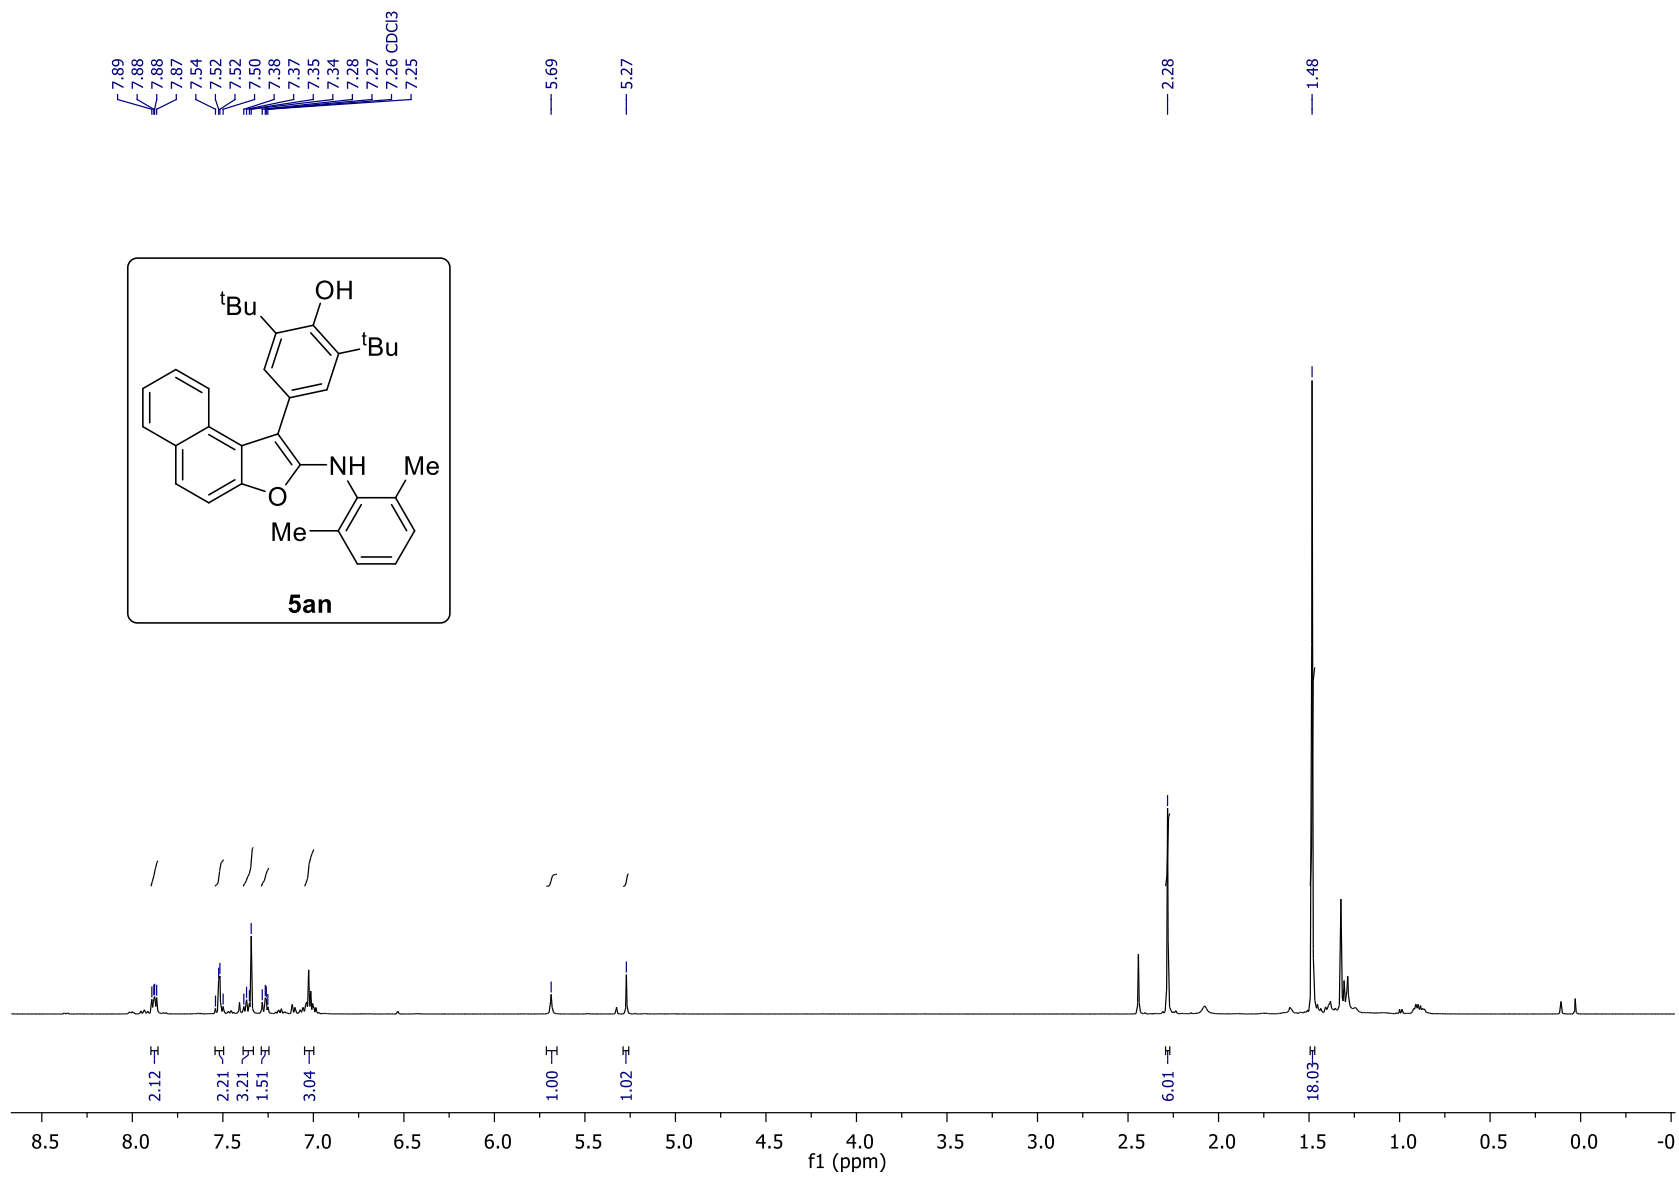

$^{13}\text{C}$  NMR of compound **5an** in  $\text{CDCl}_3$

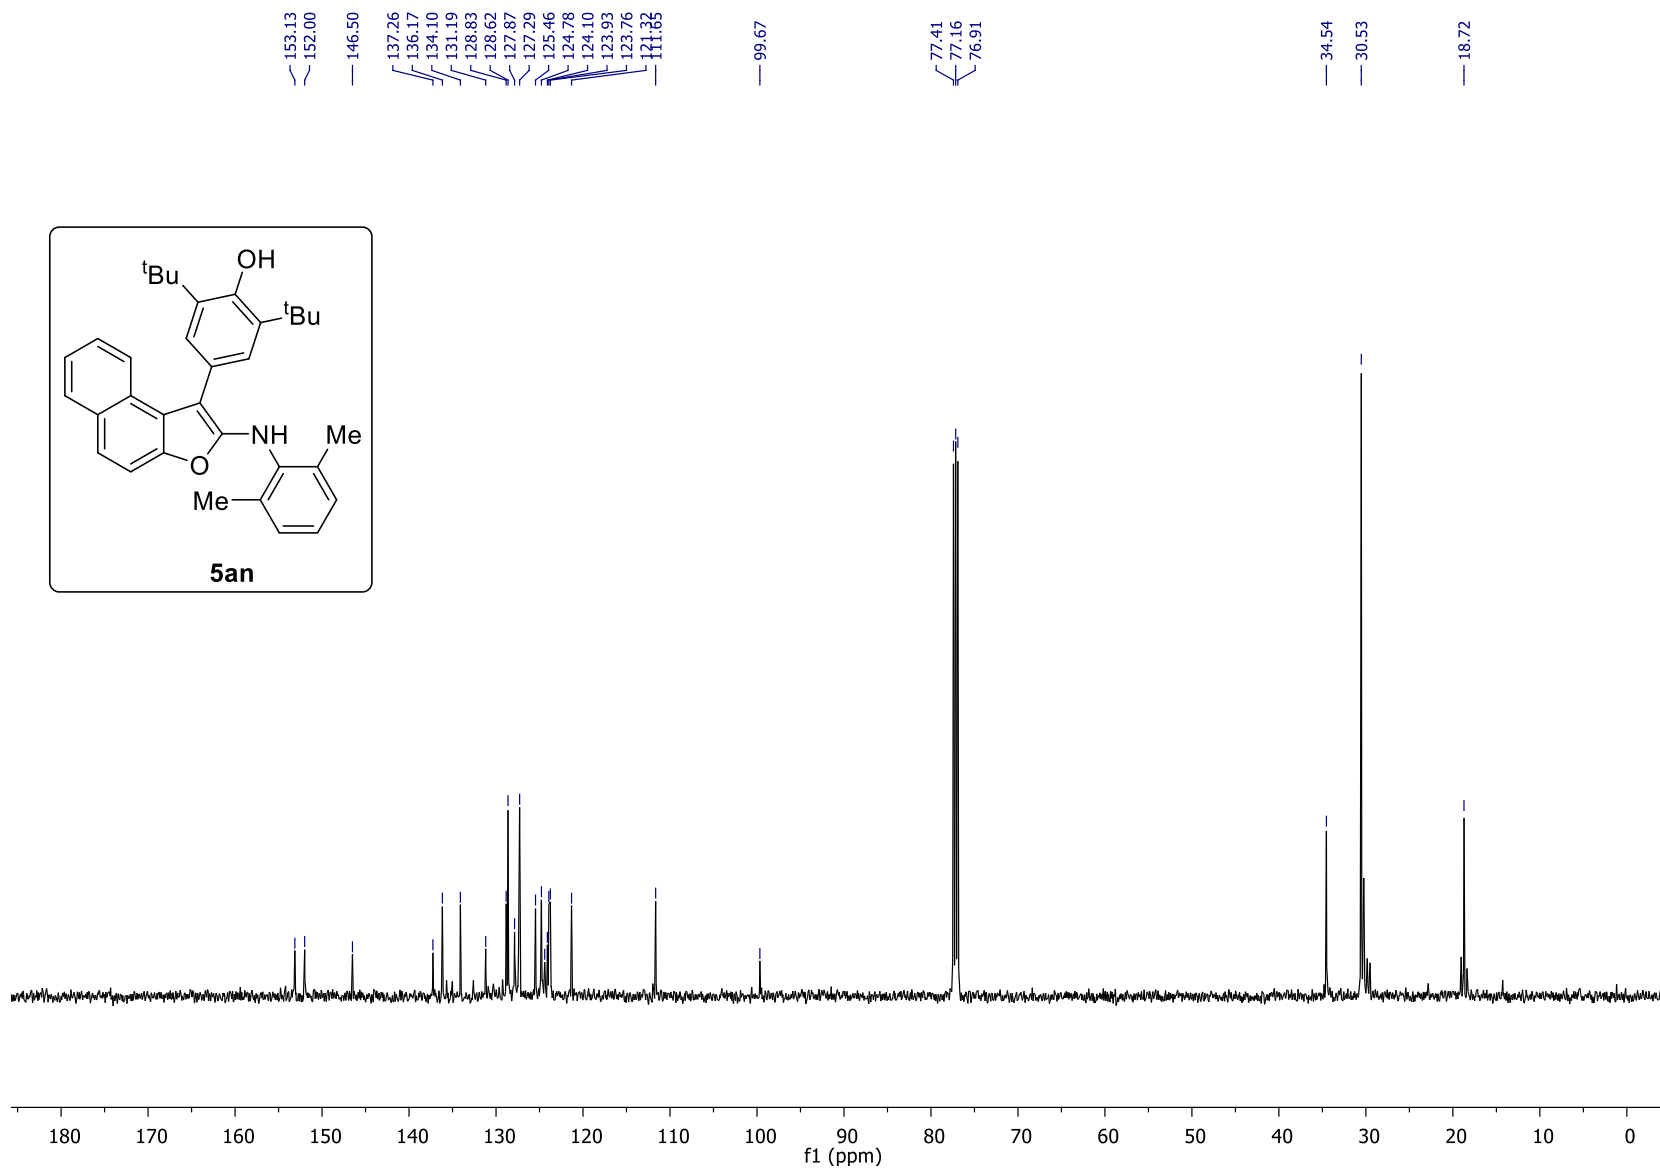

$^1\text{H}$  NMR of compound **5ao** in  $\text{CDCl}_3$

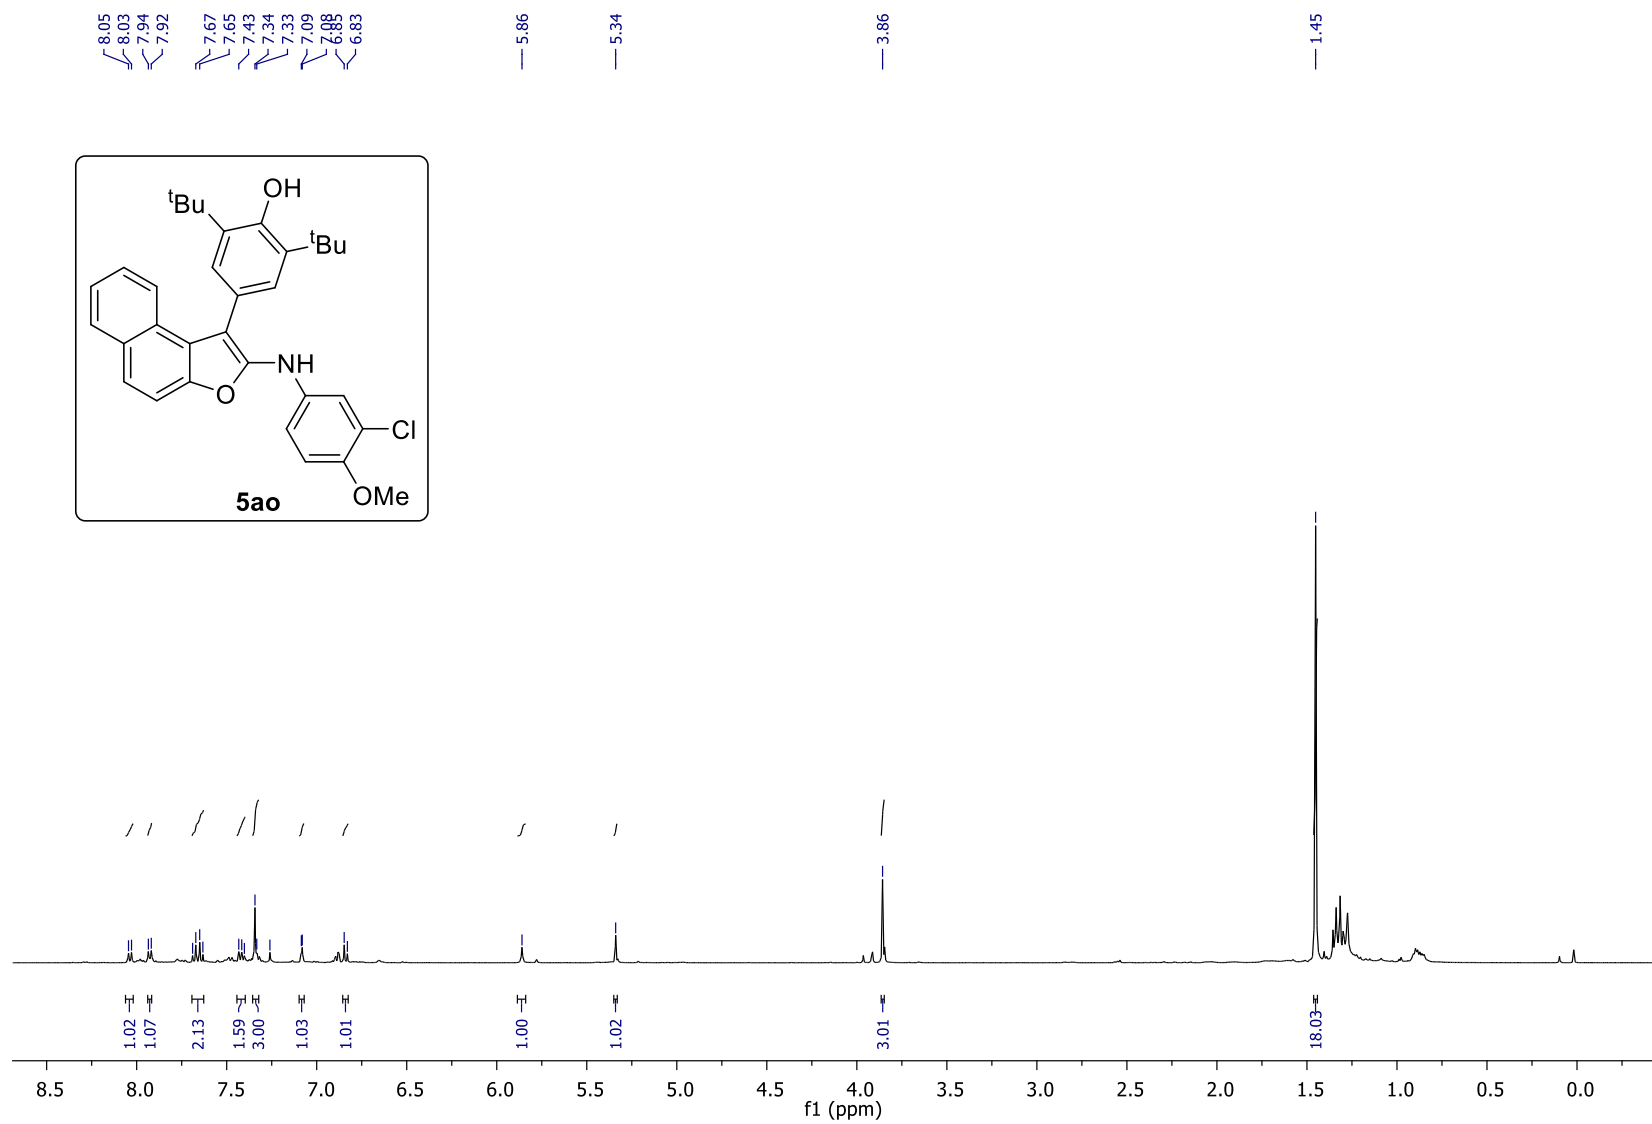

$^{13}\text{C}$  NMR of compound **5ao** in  $\text{CDCl}_3$

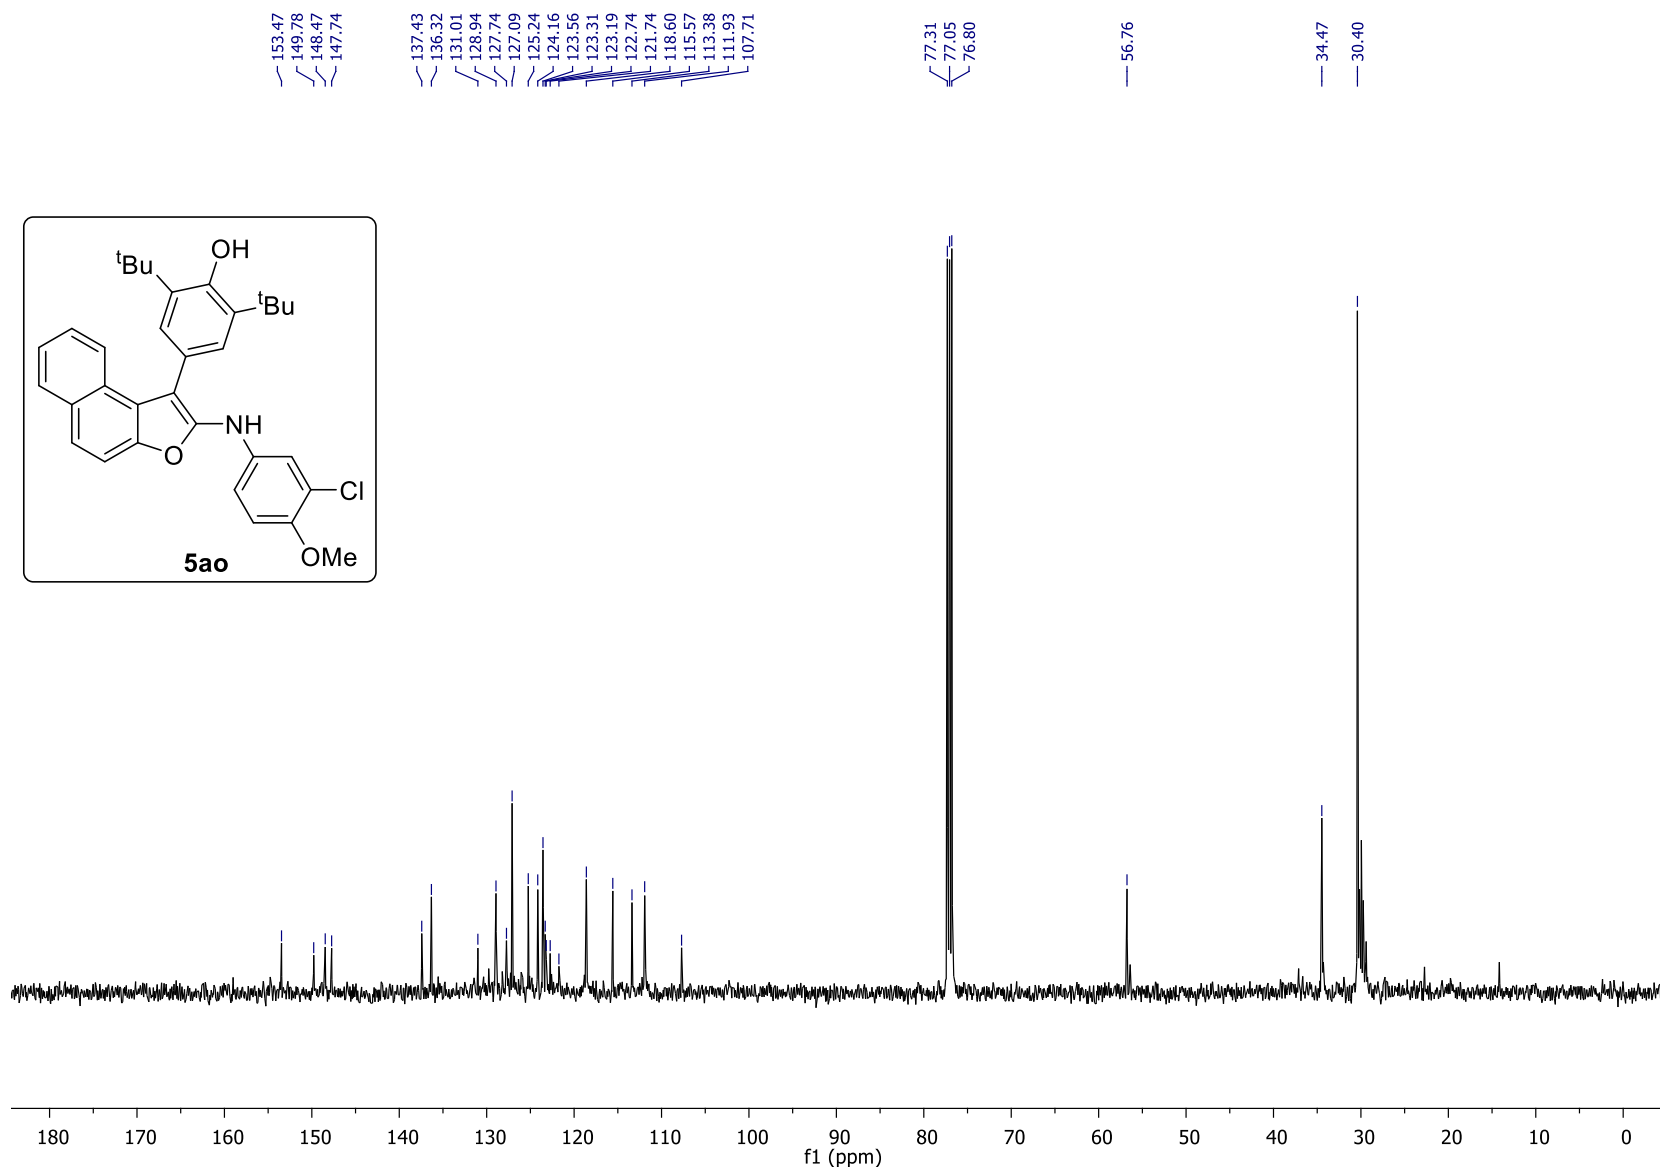

$^1\text{H}$  NMR of compound **5ap** in  $\text{CDCl}_3$

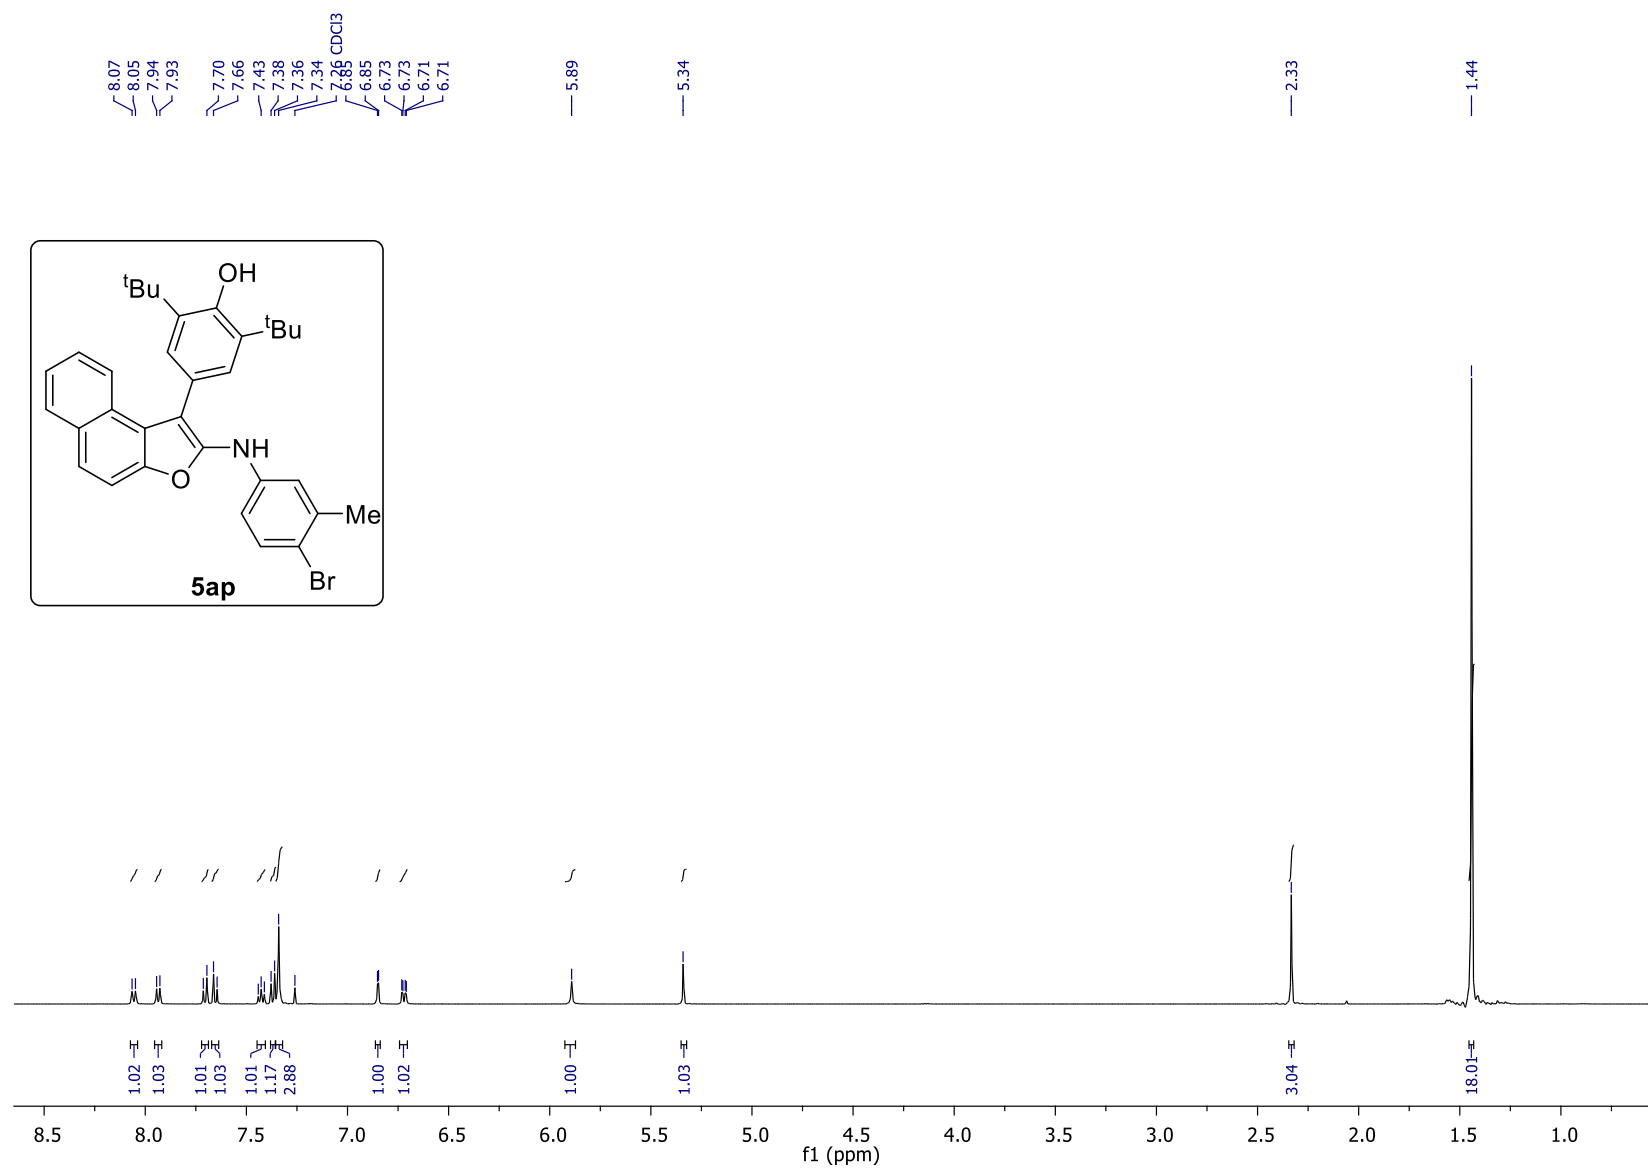

$^{13}\text{C}$  NMR of compound **5ap** in  $\text{CDCl}_3$

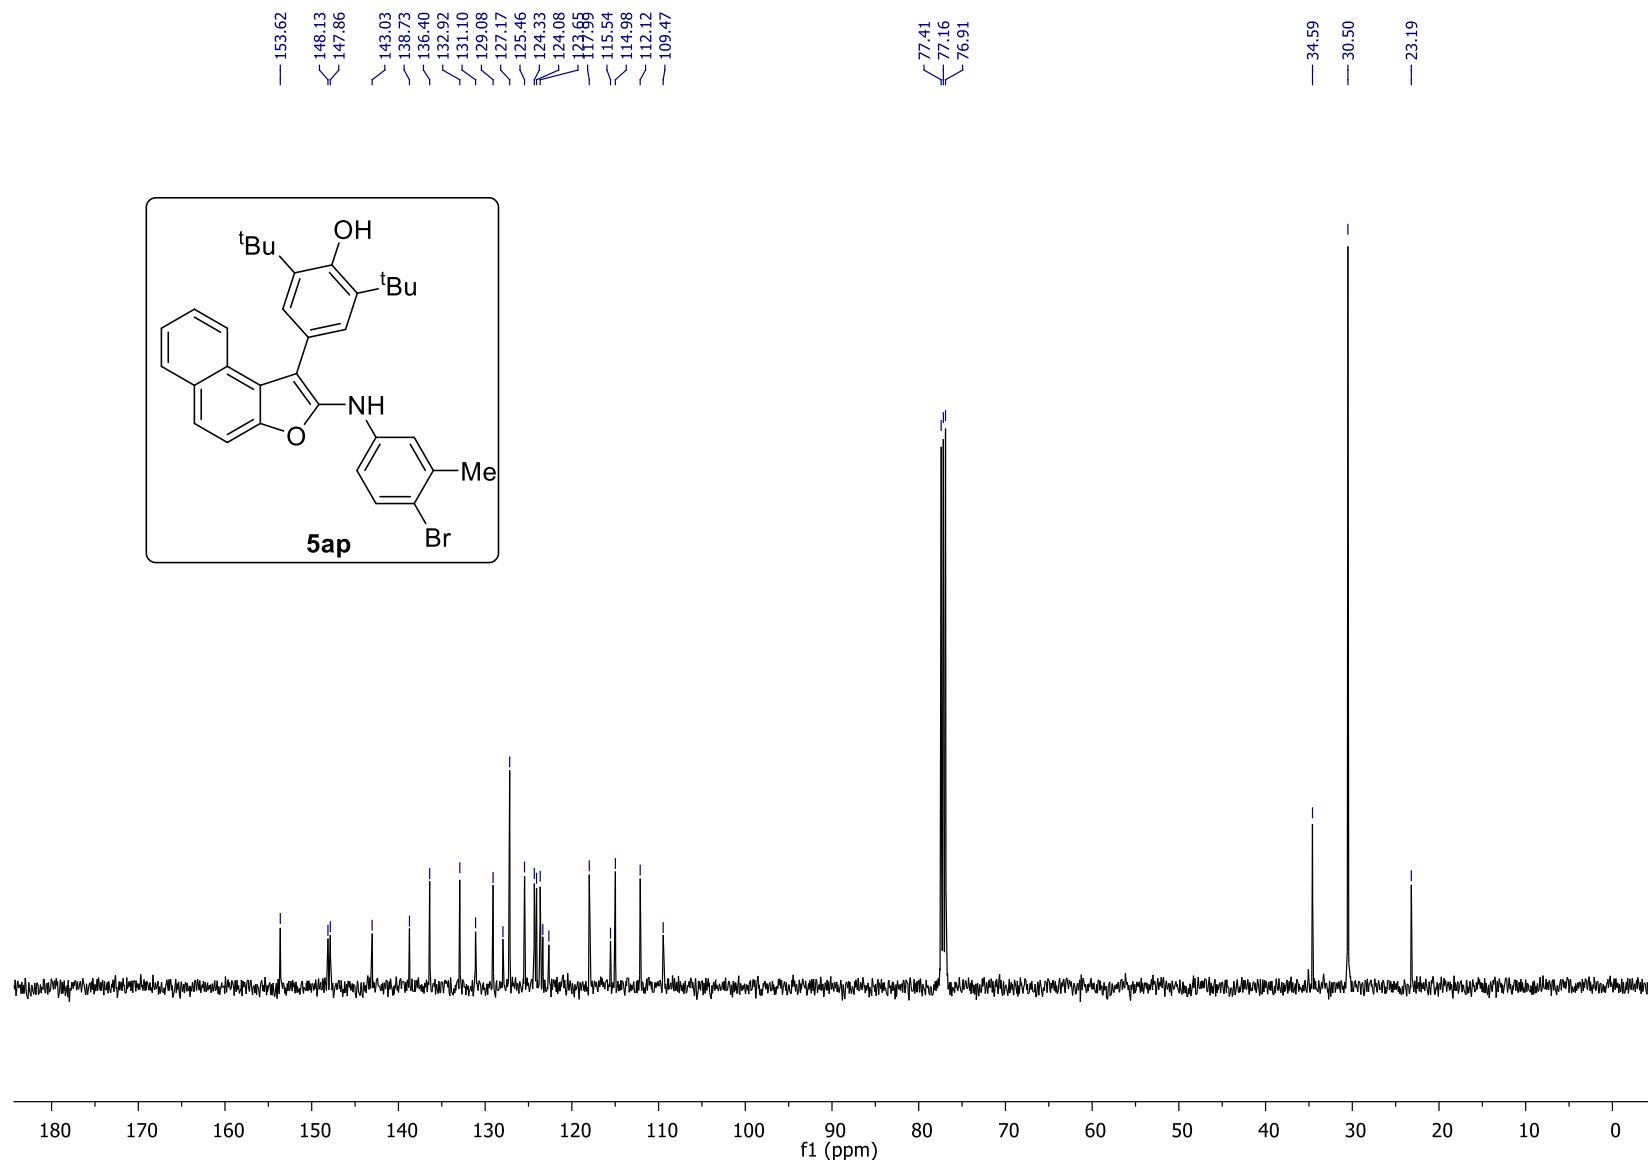

$^1\text{H}$  NMR of compound **5aq** in  $\text{CDCl}_3$

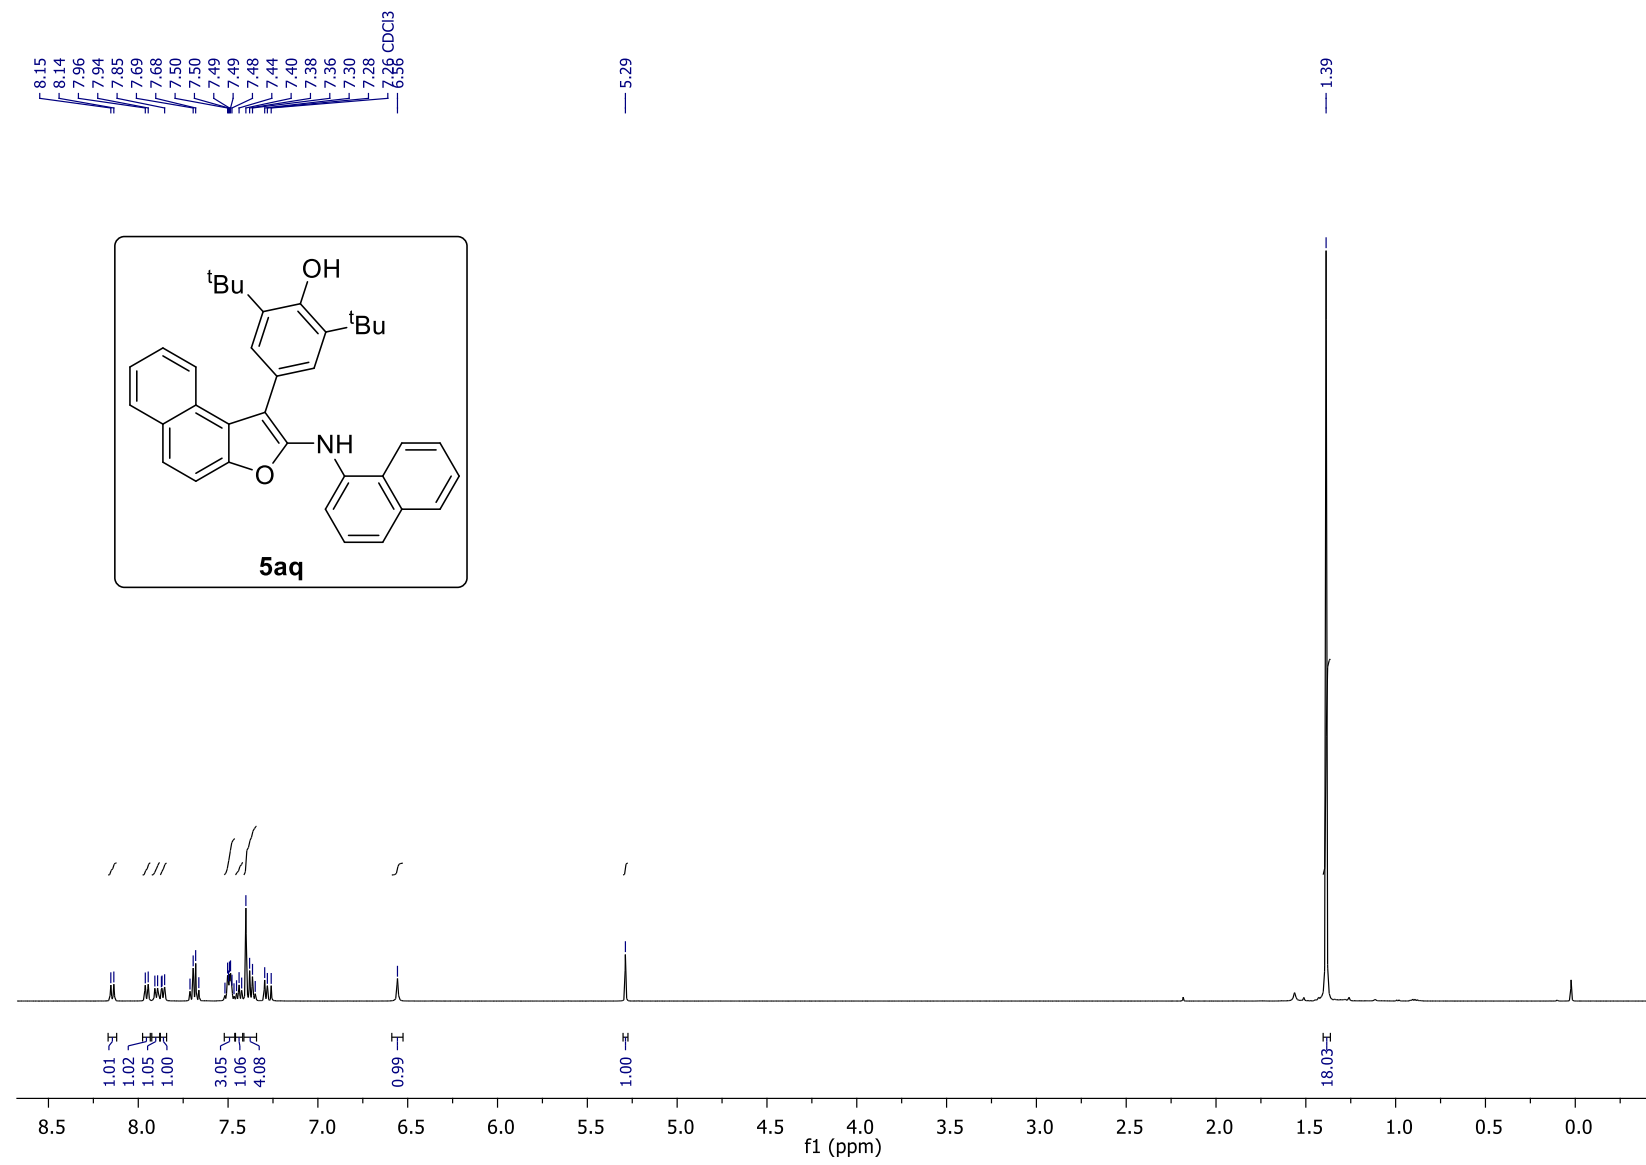

$^{13}\text{C}$  NMR of compound **5aq** in  $\text{CDCl}_3$

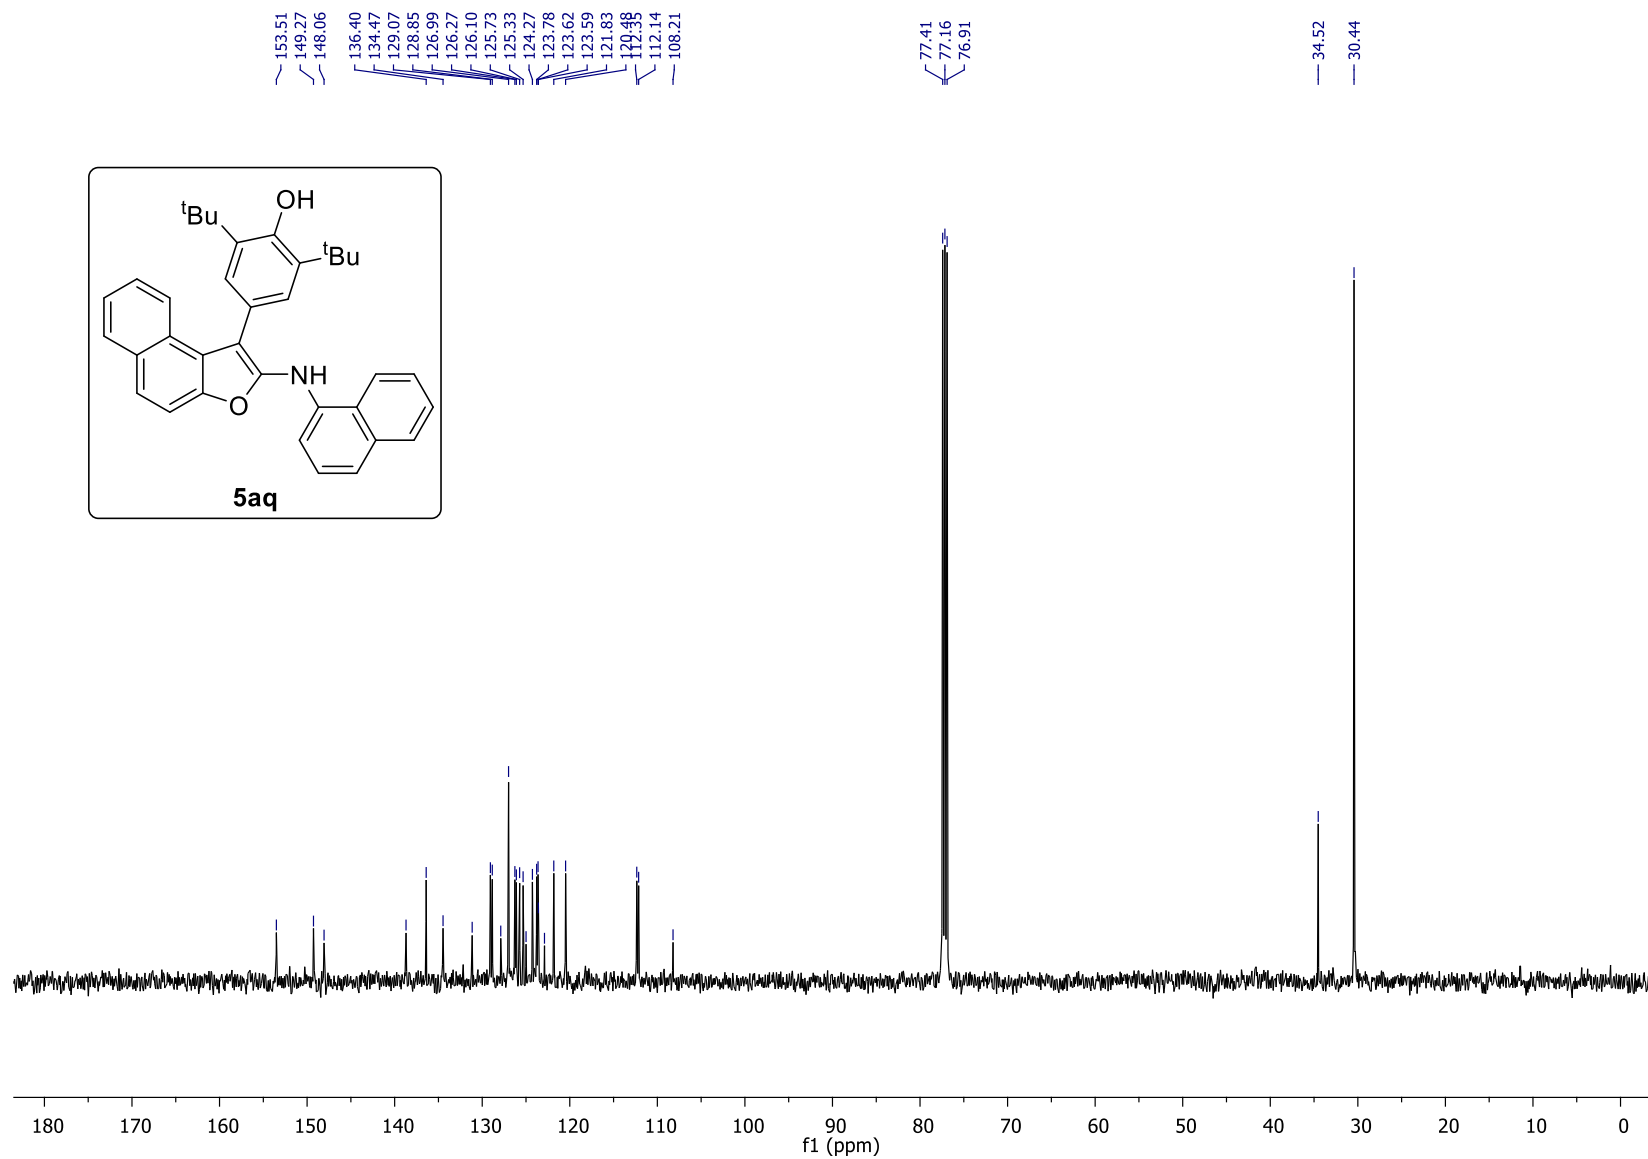



$^1\text{H}$  NMR of compound **5ar** in  $\text{CDCl}_3$

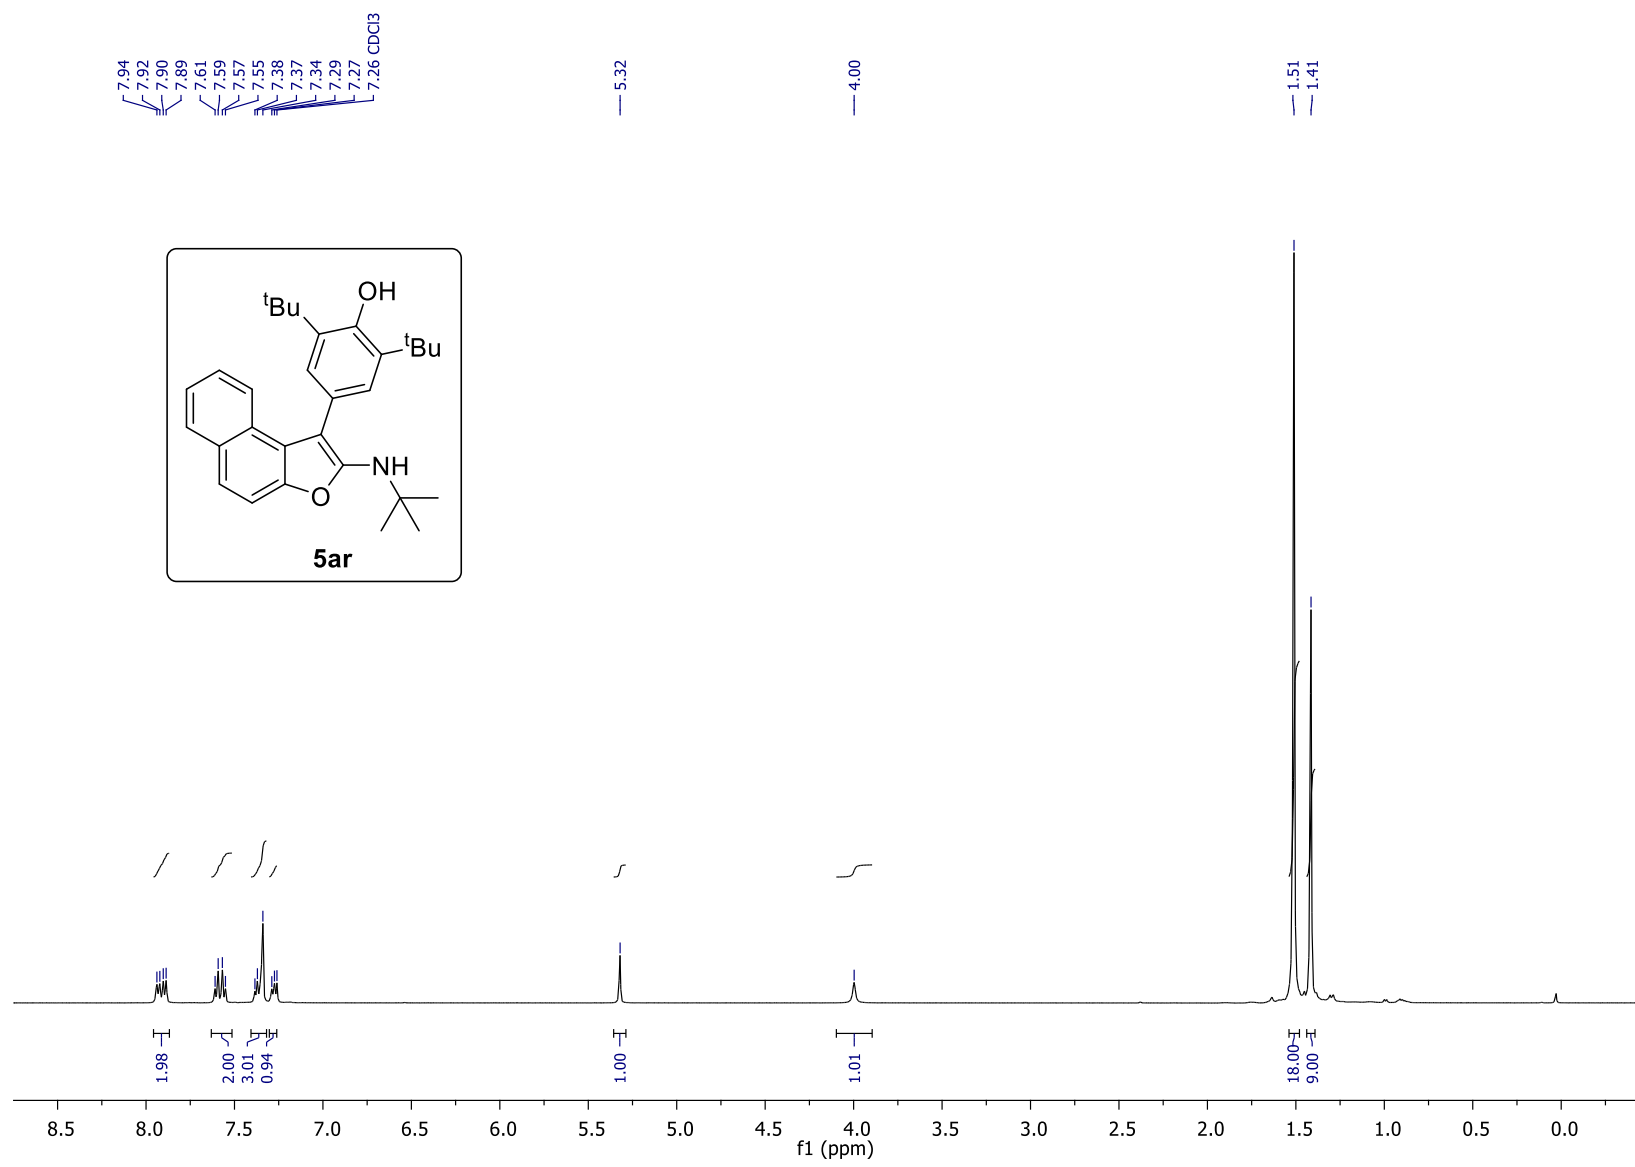

$^{13}\text{C}$  NMR of compound **5ar** in  $\text{CDCl}_3$

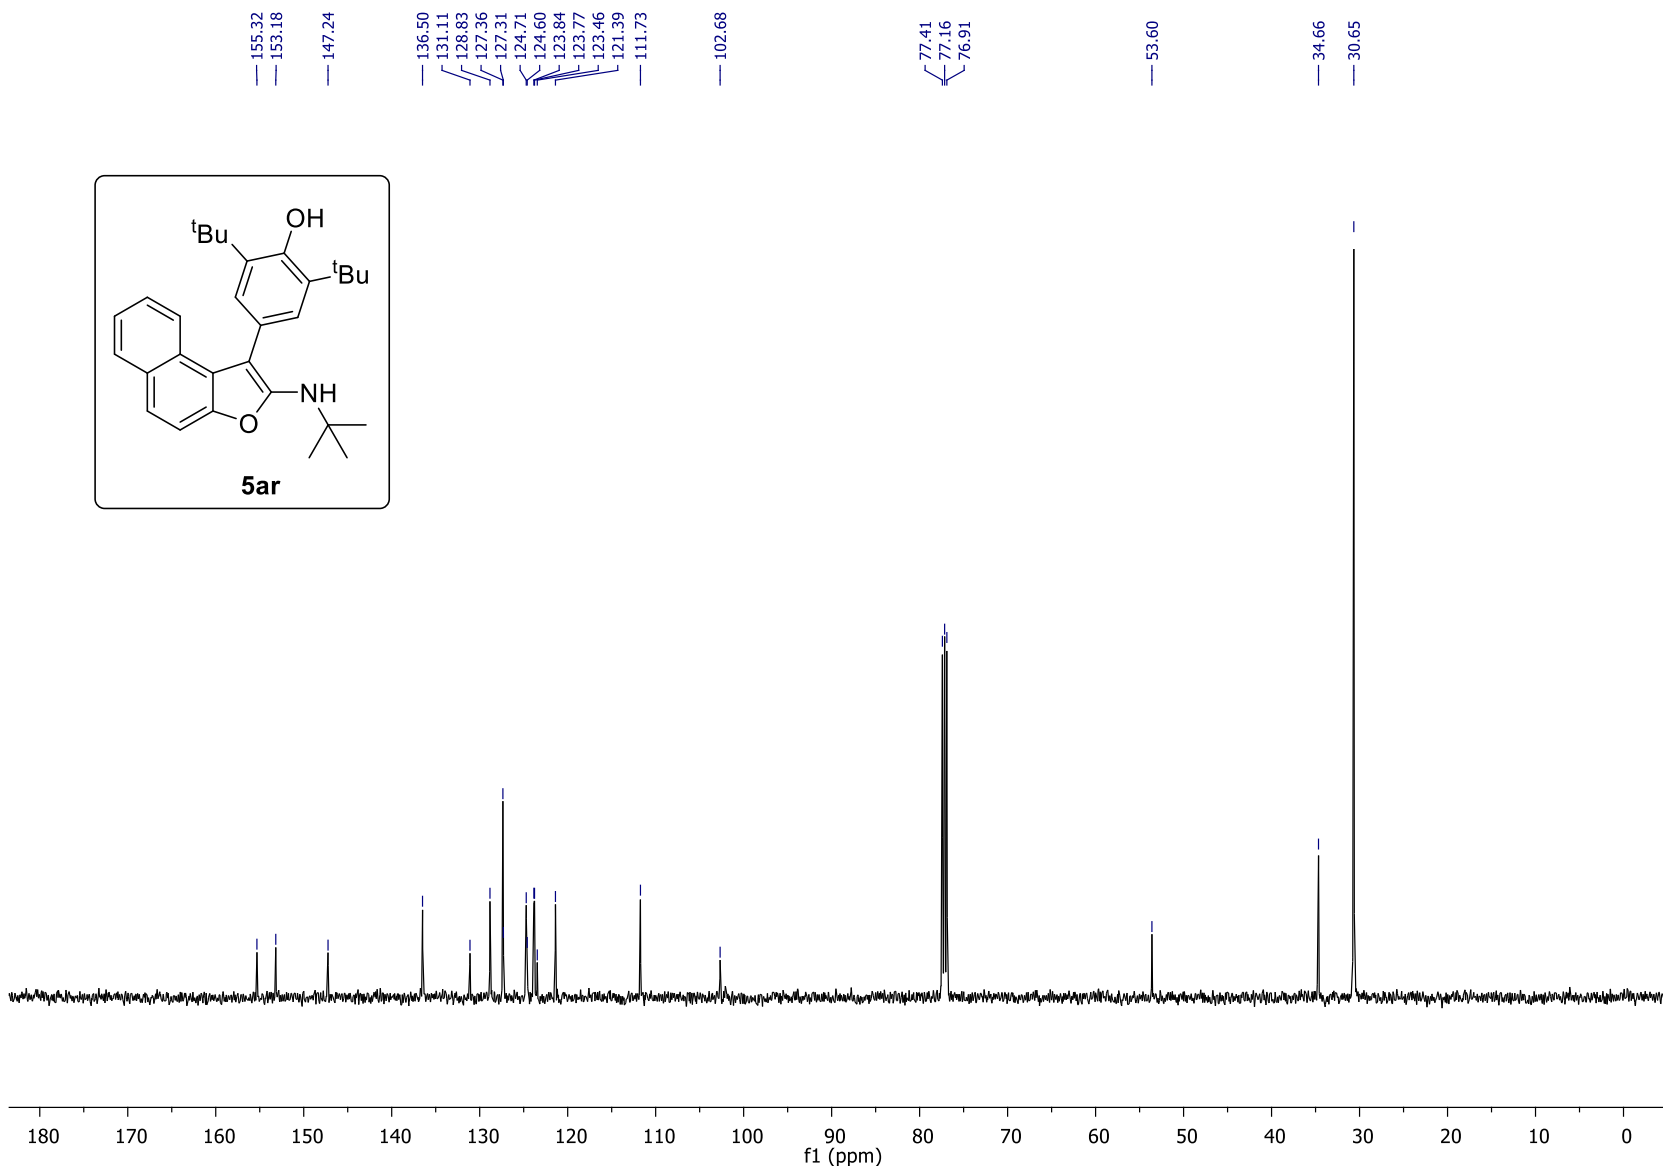

$^1\text{H}$  NMR of compound **5as** in  $\text{CDCl}_3$

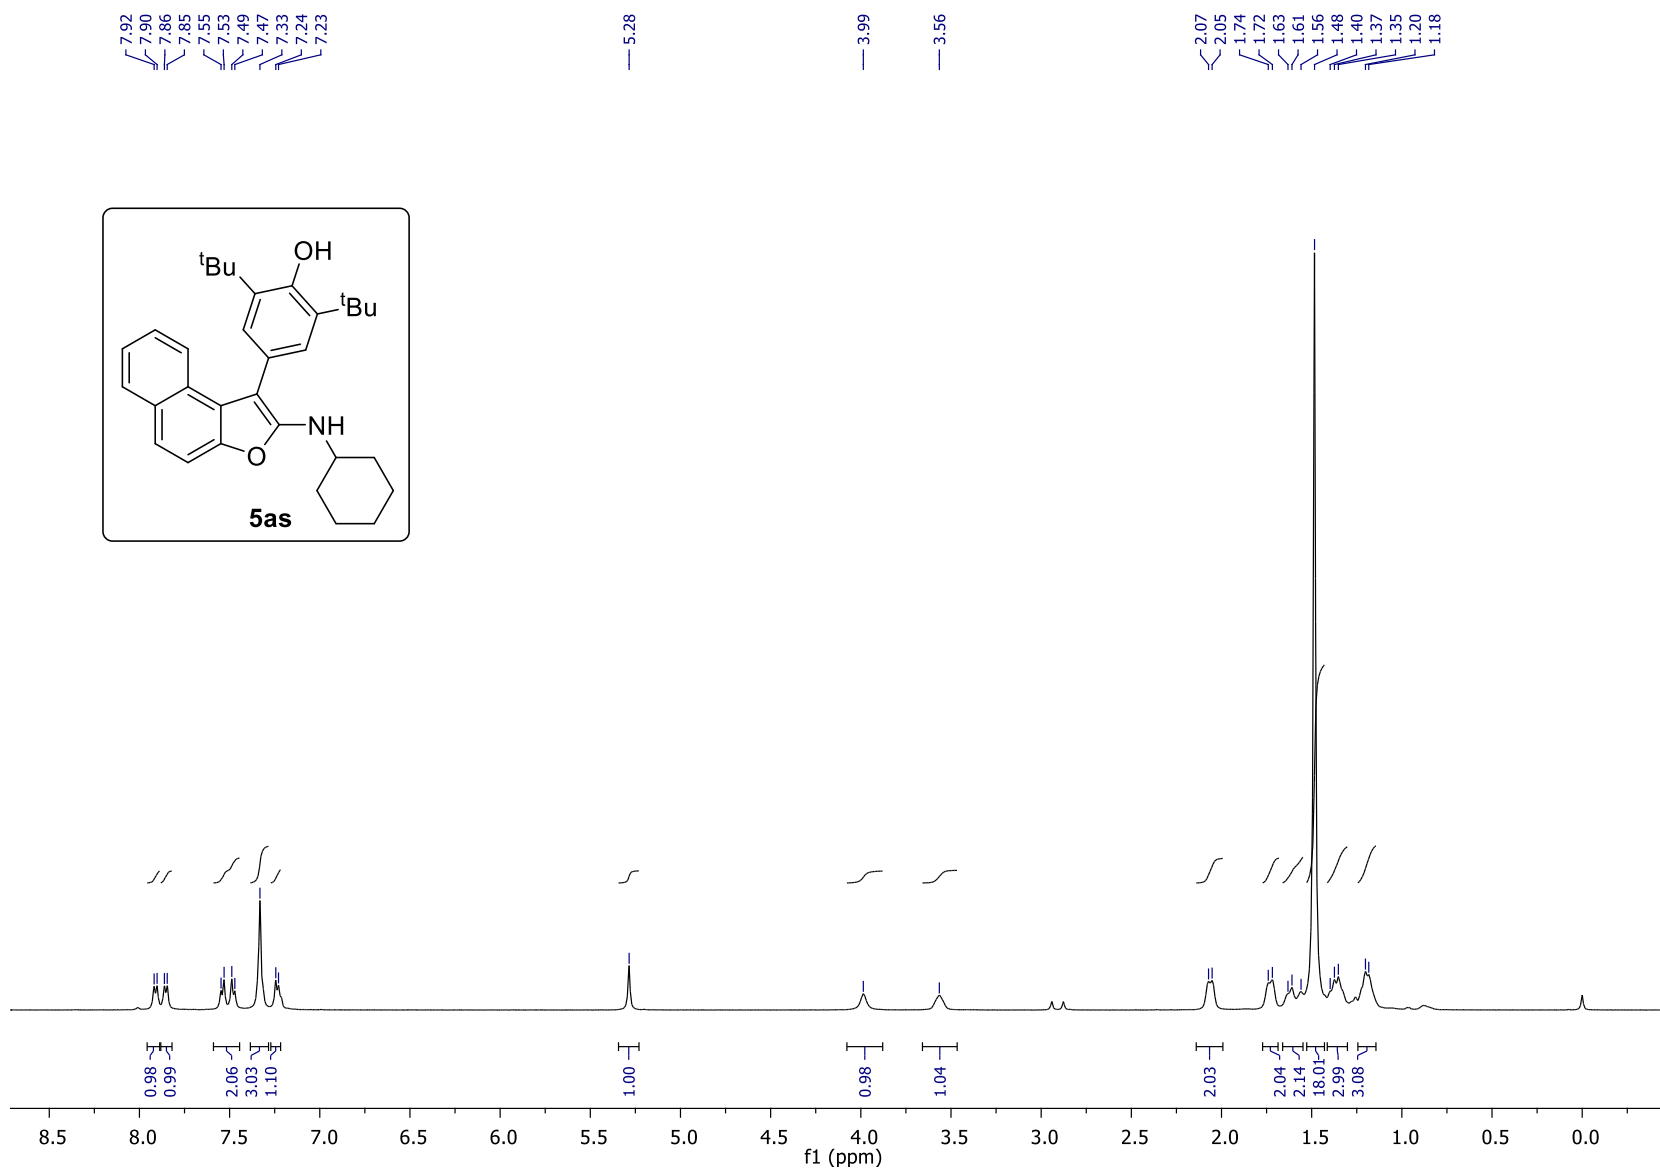

$^{13}\text{C}$  NMR of compound **5as** in  $\text{CDCl}_3$

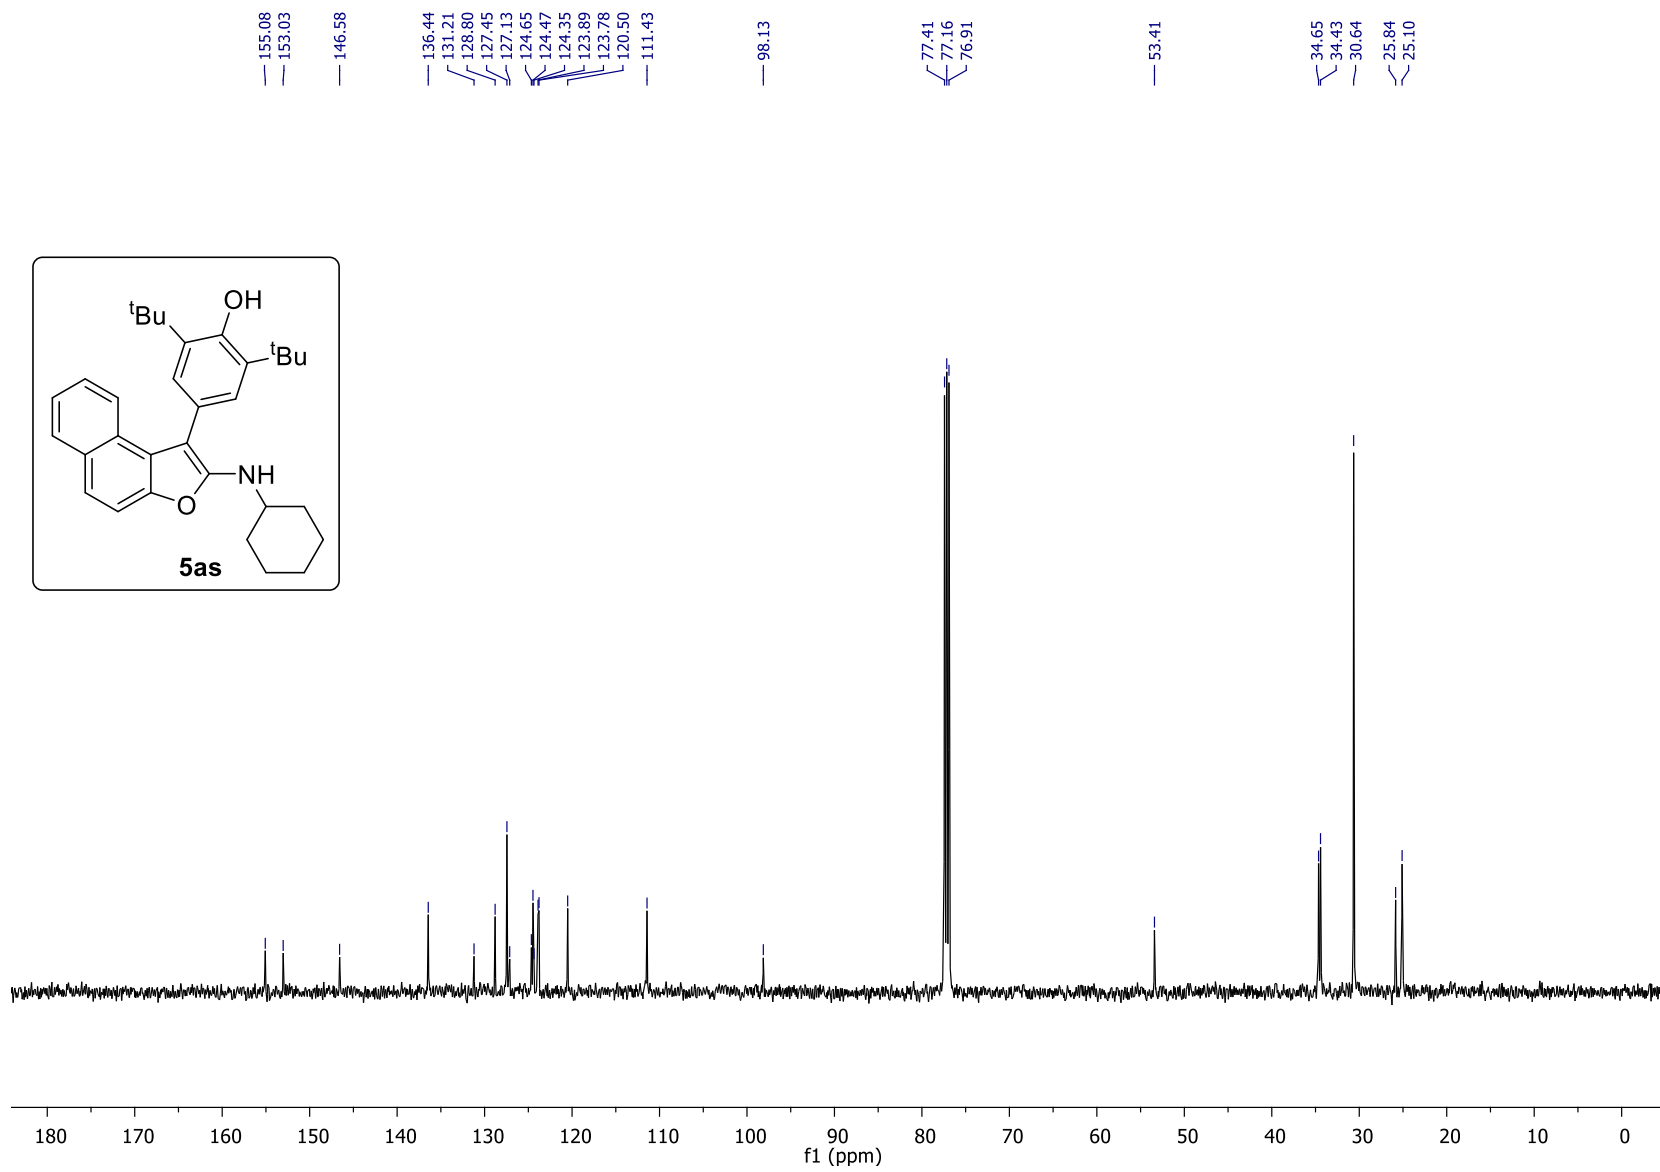

$^1\text{H}$  NMR of compound **5at** in  $\text{CDCl}_3$

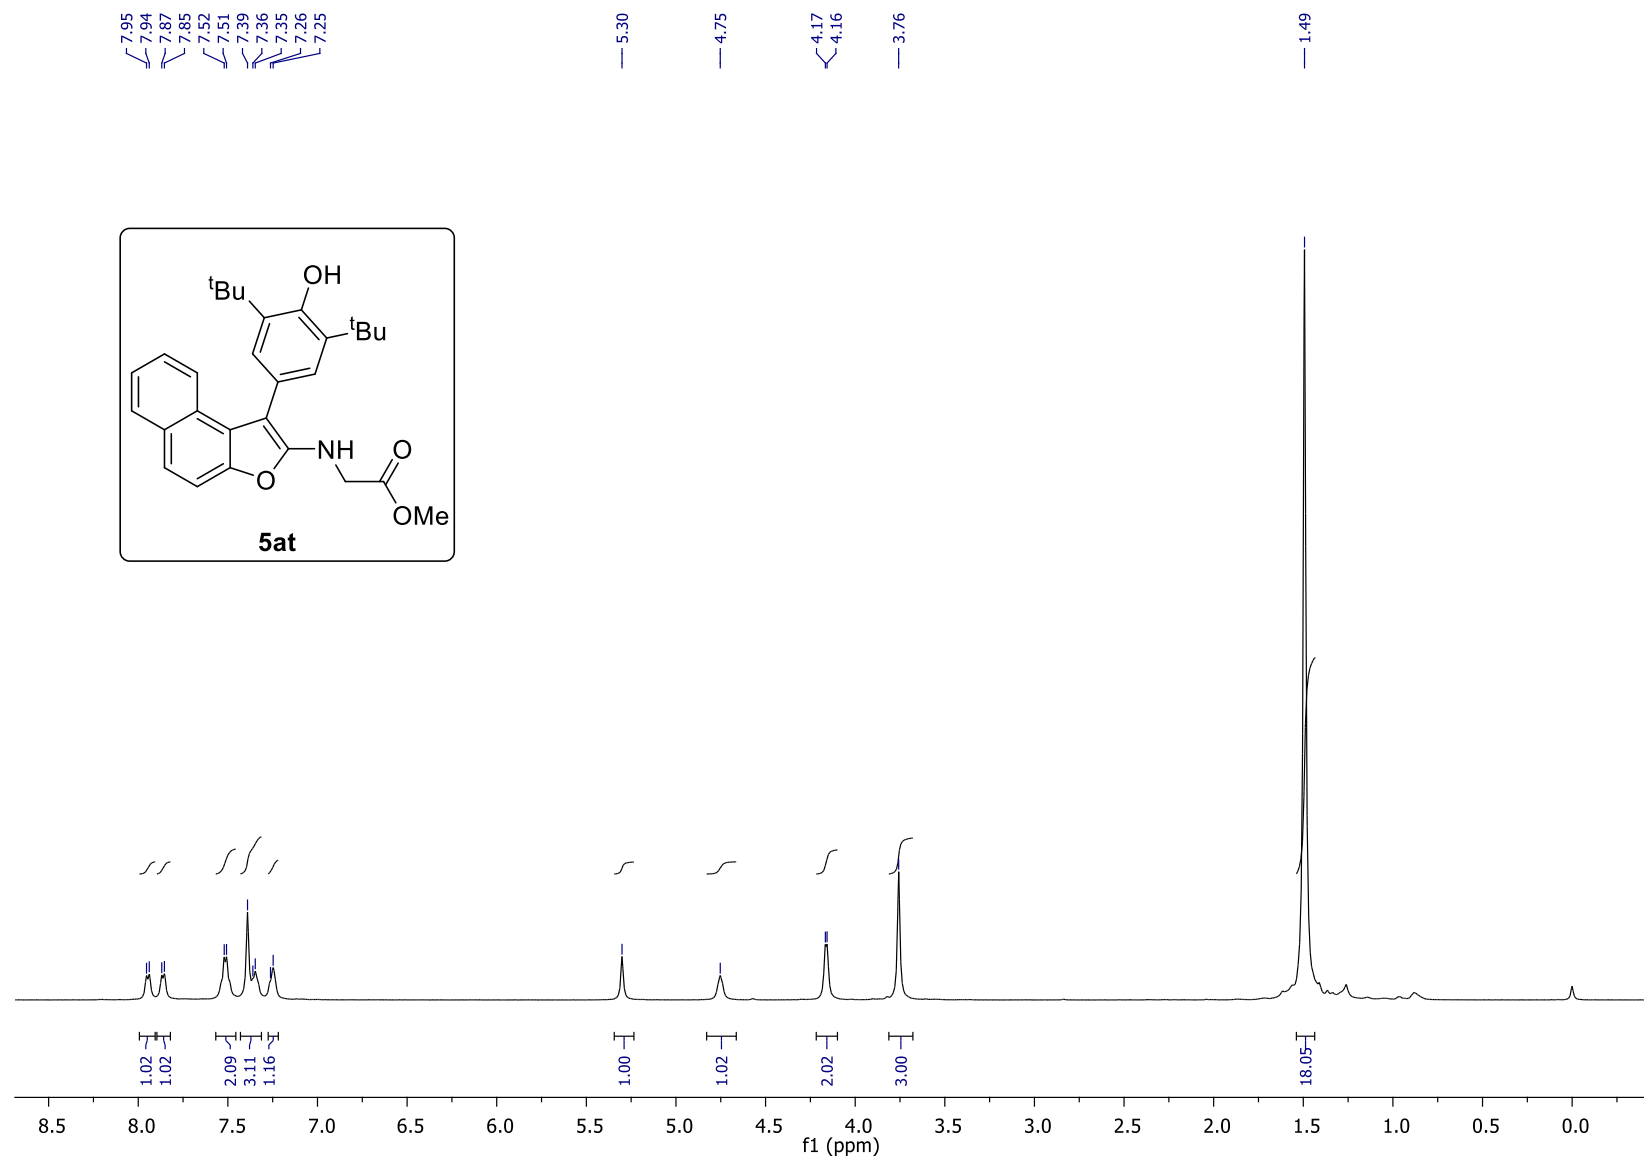

$^{13}\text{C}$  NMR of compound **5at** in  $\text{CDCl}_3$

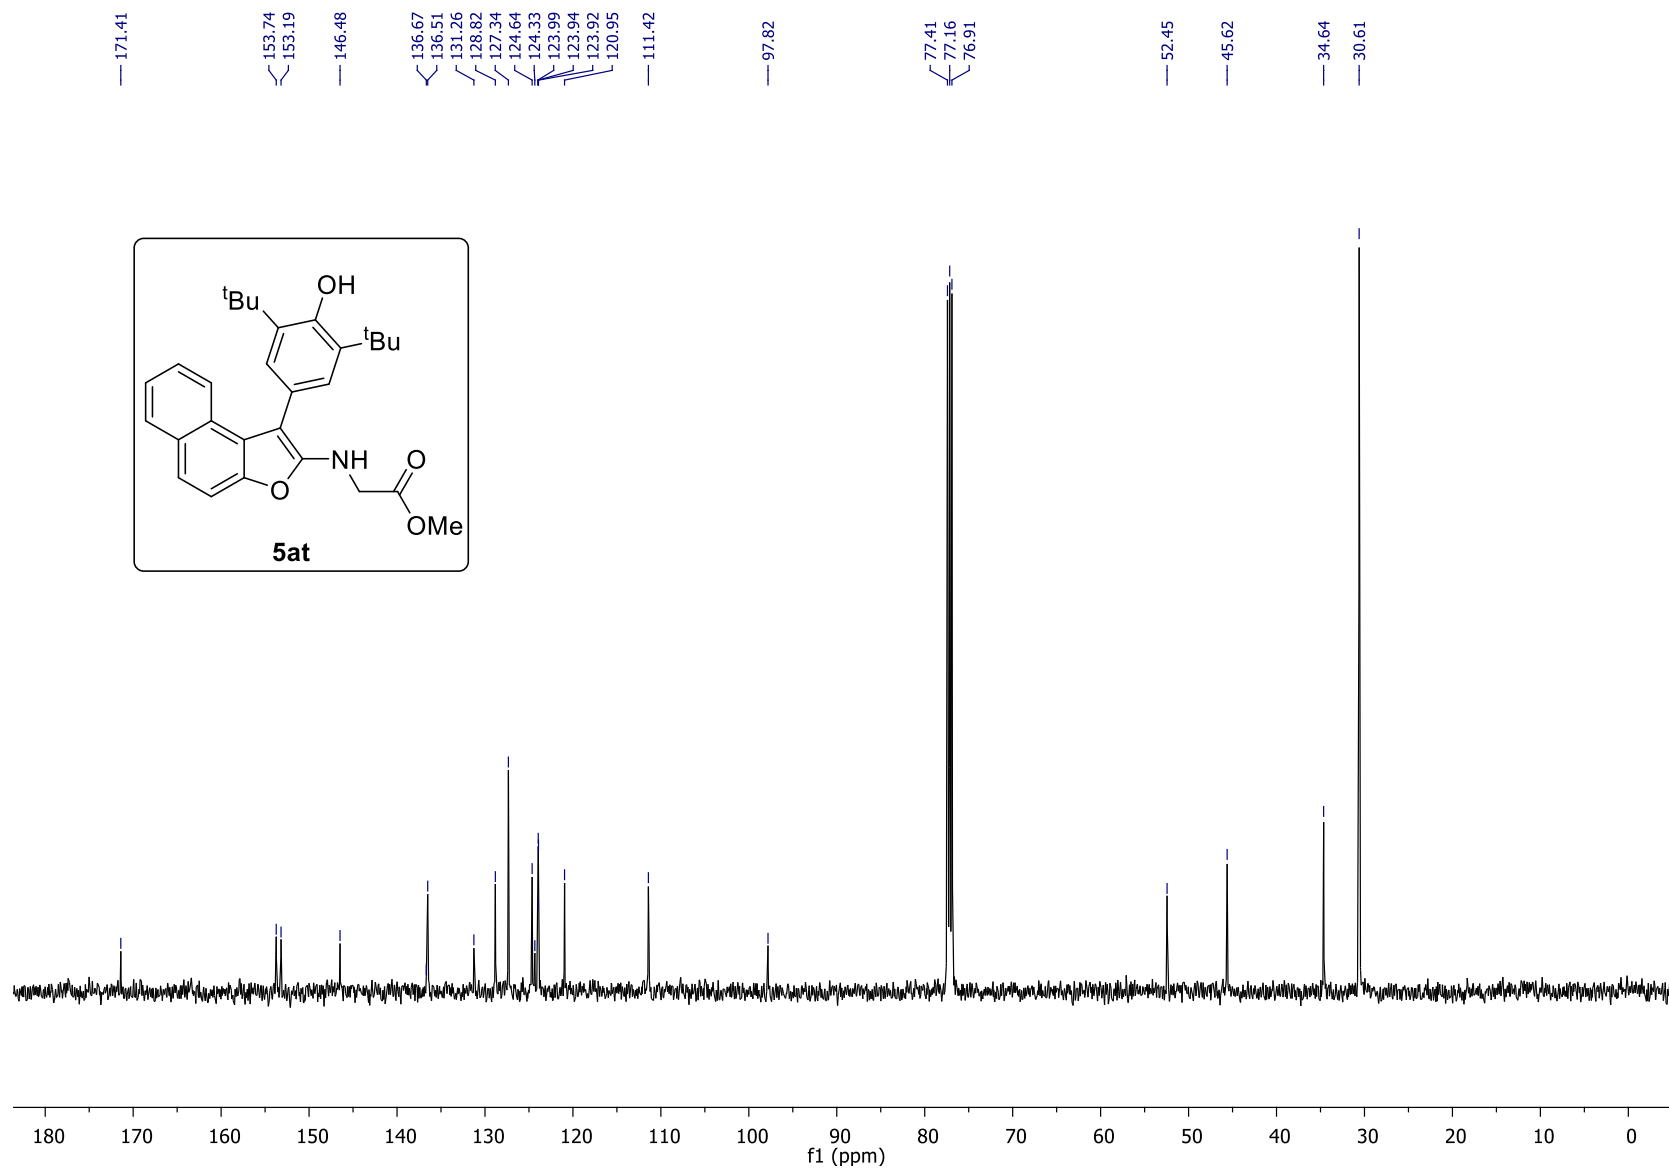

$^1\text{H}$  NMR of compound **5au** in  $\text{CDCl}_3$

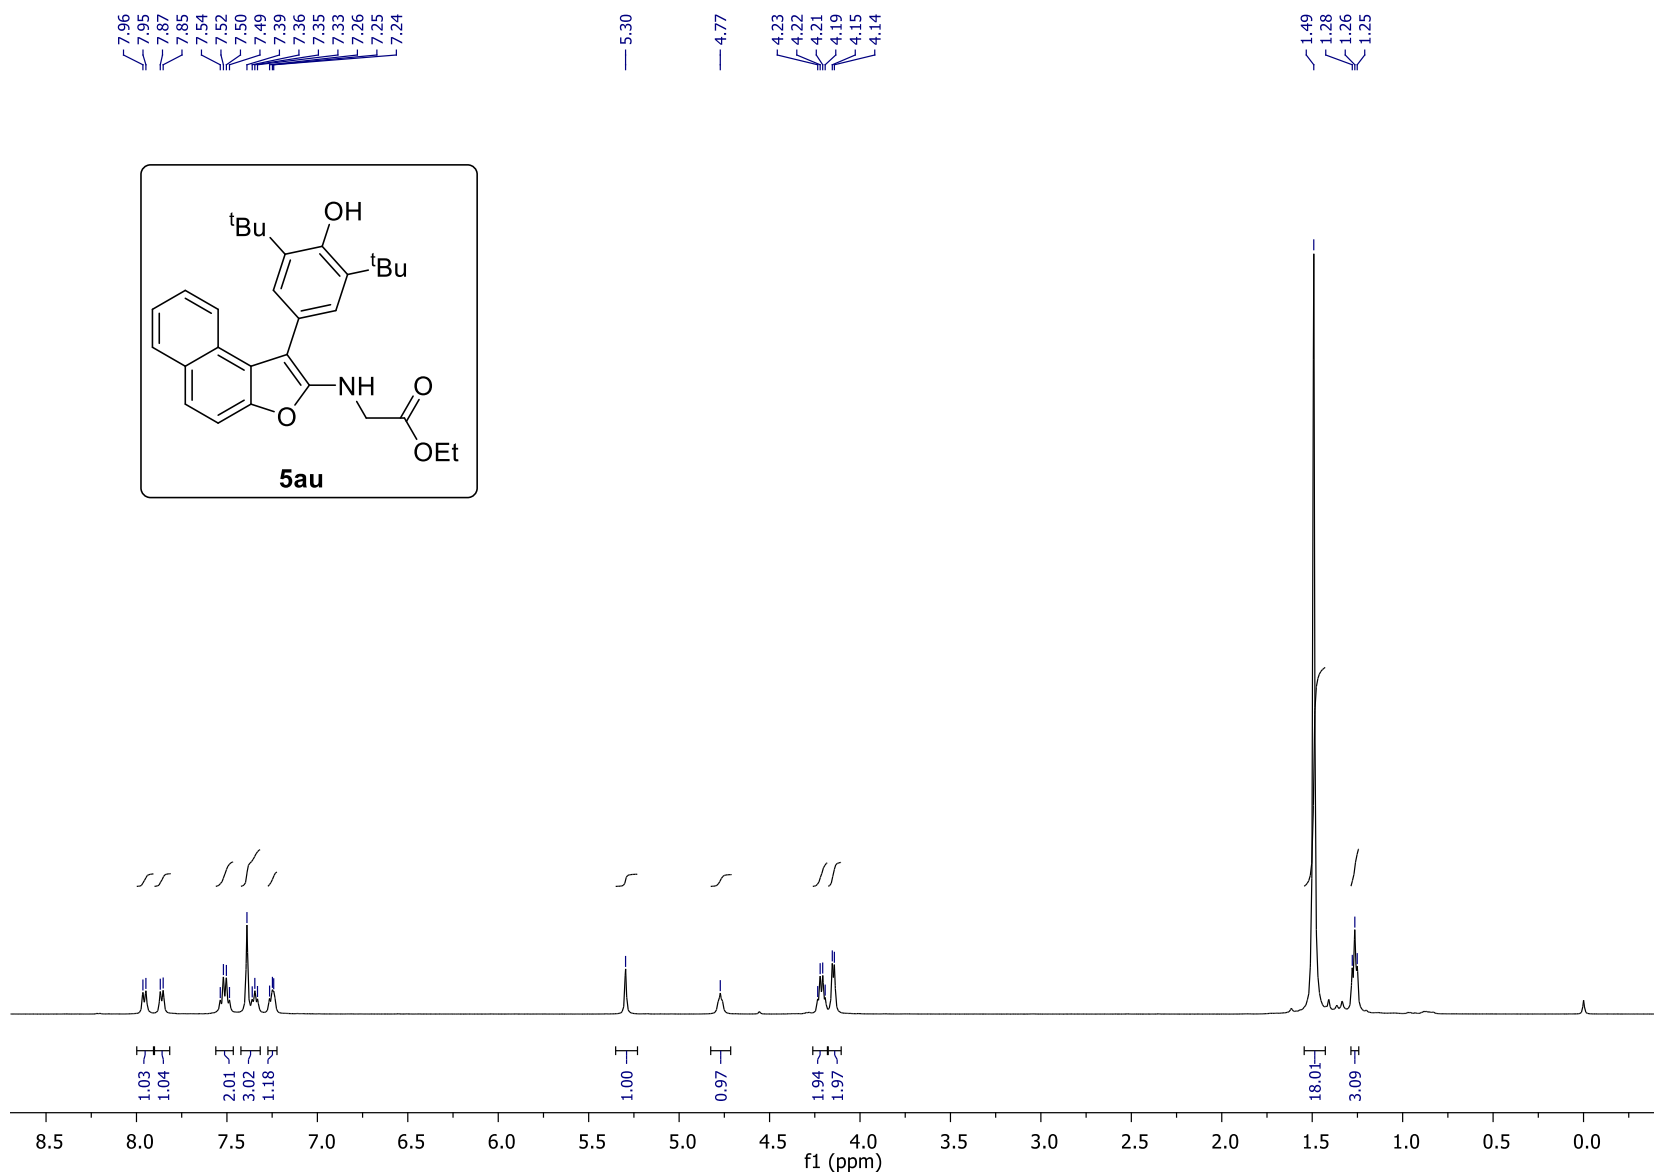

$^{13}\text{C}$  NMR of compound **5au** in  $\text{CDCl}_3$

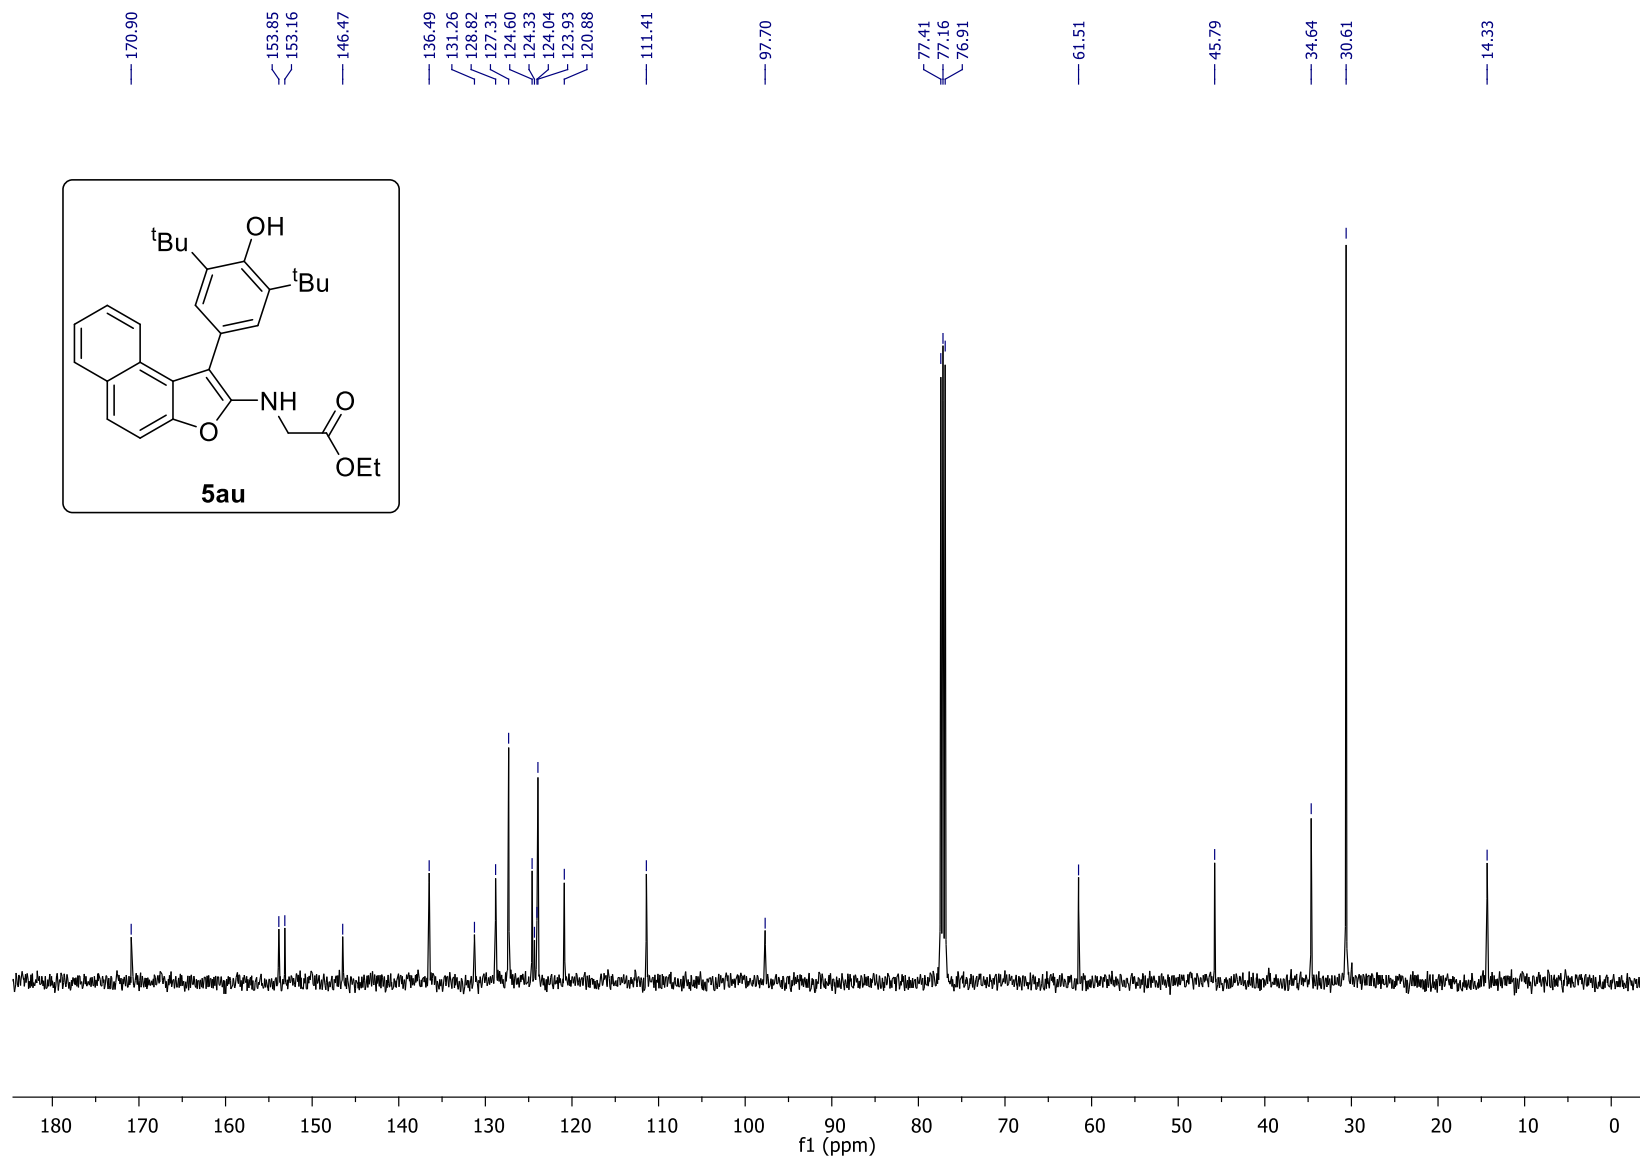



$^1\text{H}$  NMR of compound **6** in  $\text{CDCl}_3$

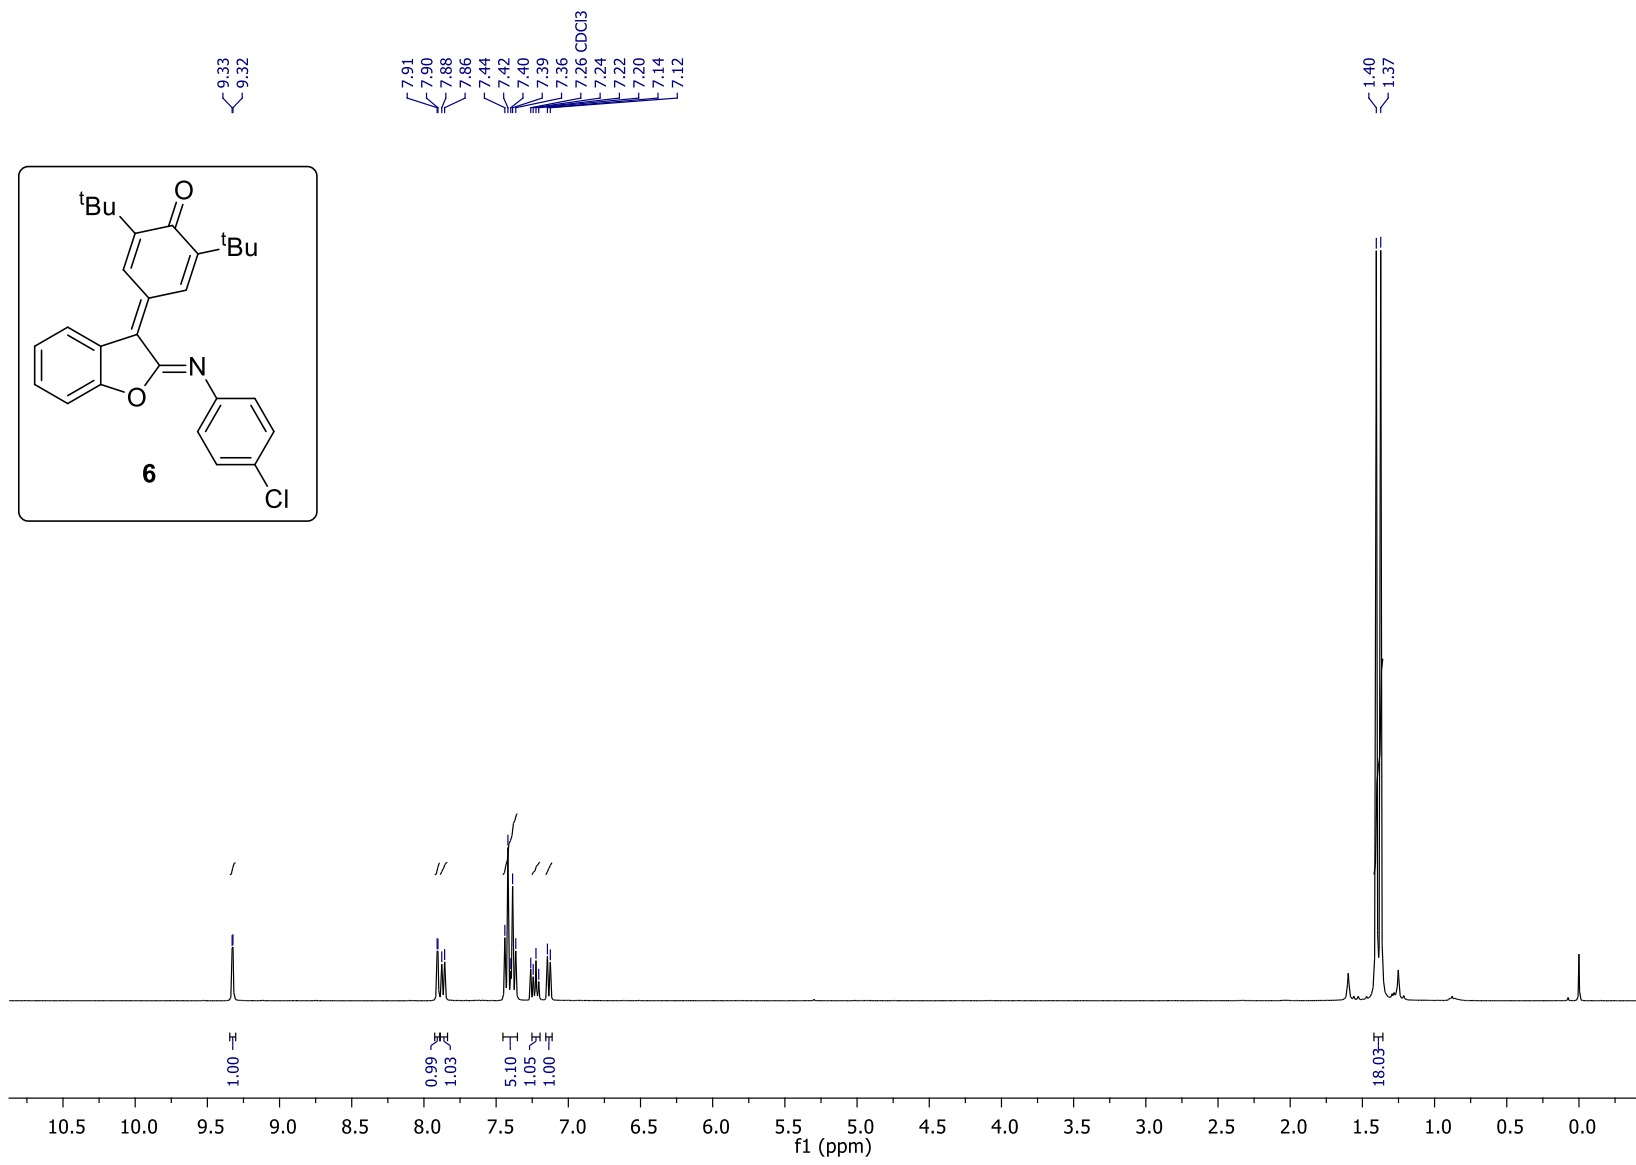

$^{13}\text{C}$  NMR of compound **6** in  $\text{CDCl}_3$

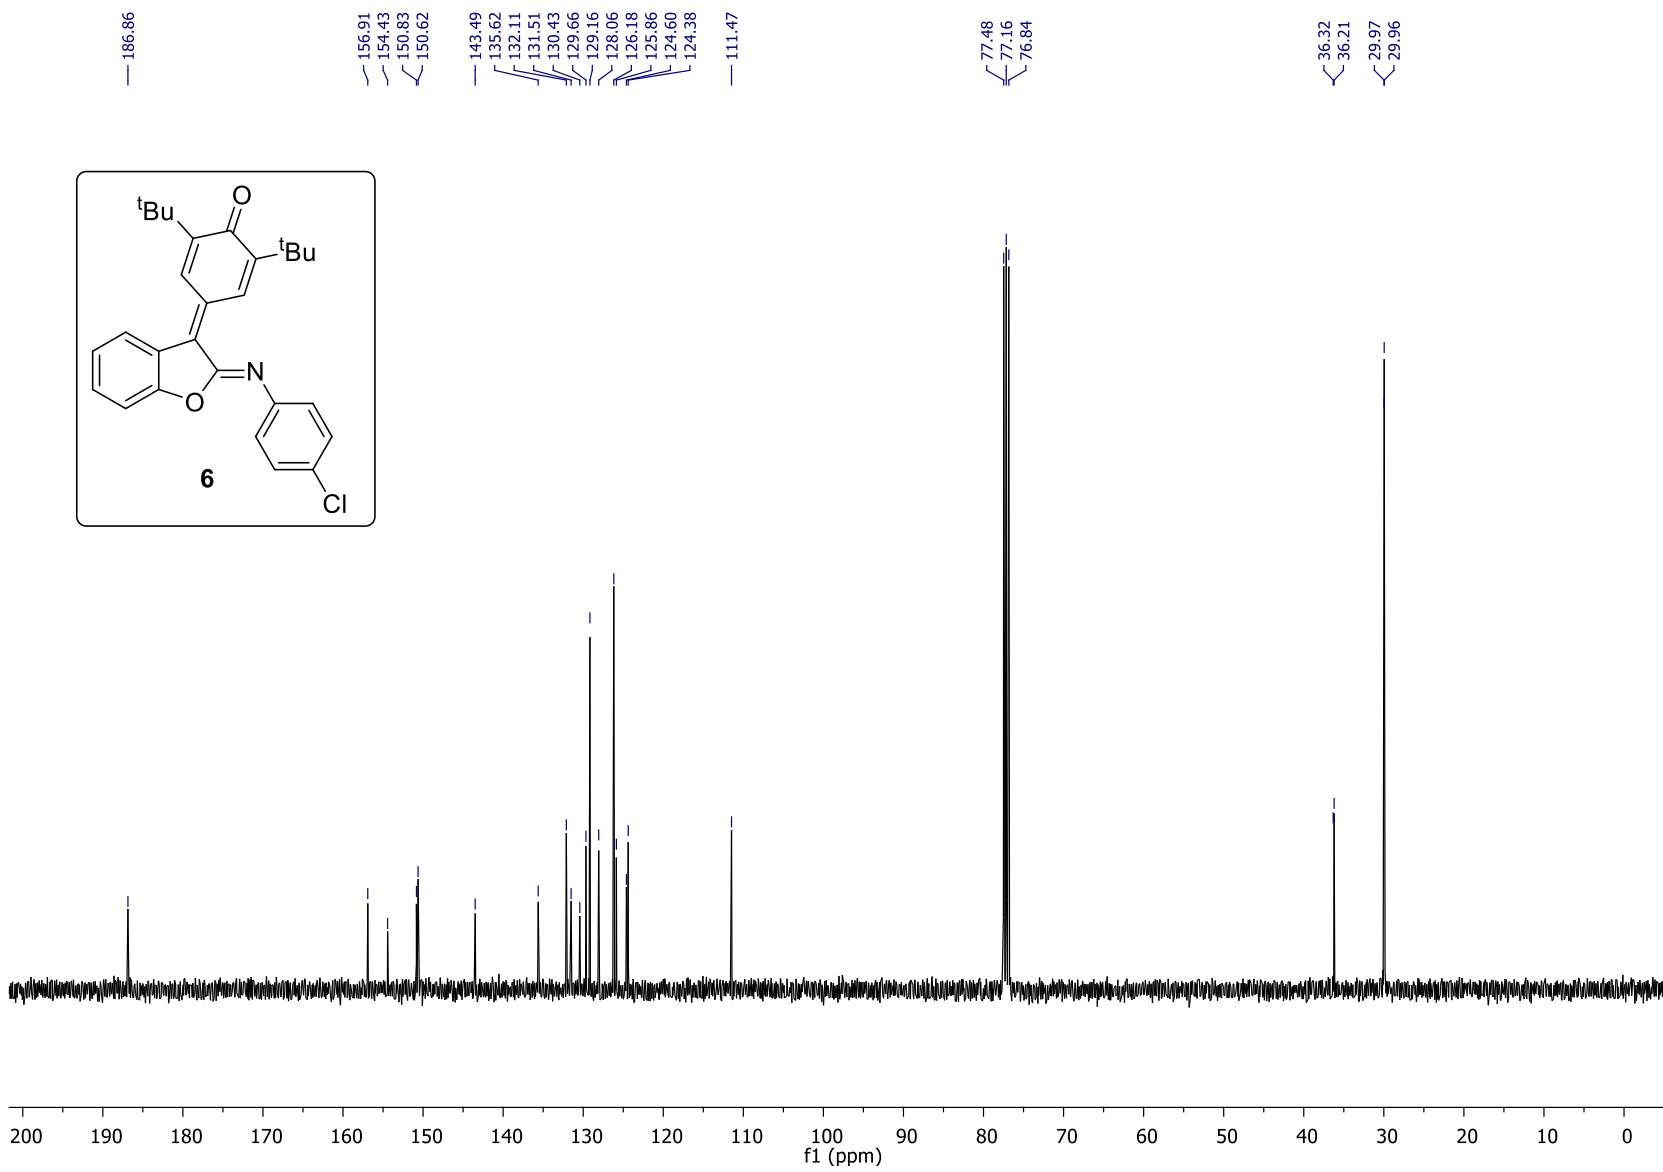

$^1\text{H}$  NMR of compound **7a** in  $\text{CDCl}_3$

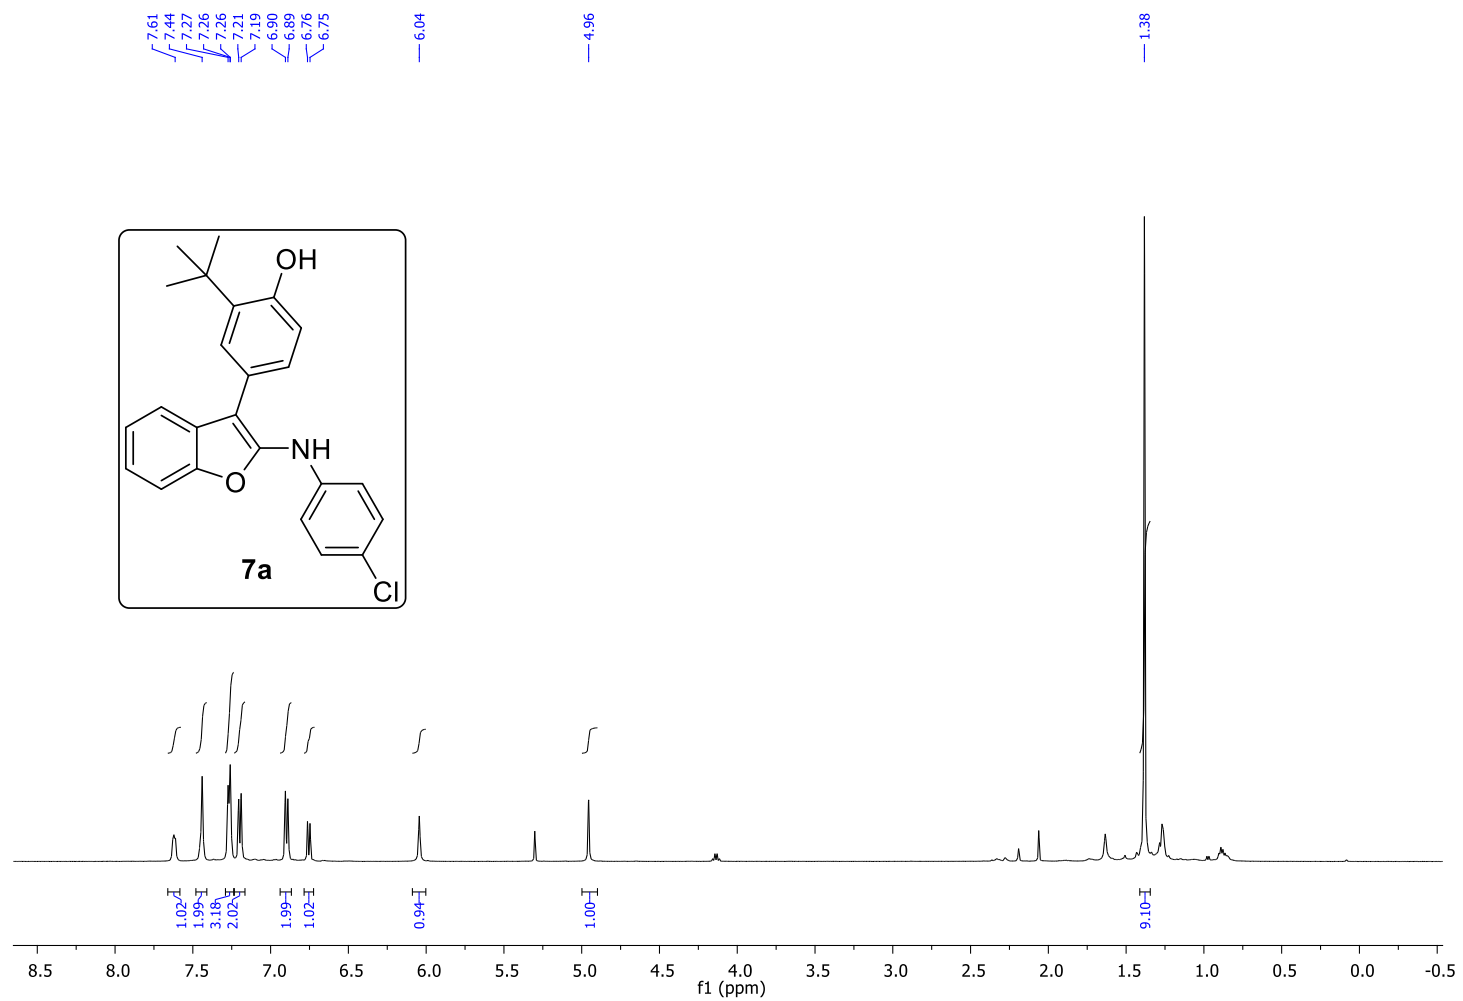

$^{13}\text{C}$  NMR of compound **7a** in  $\text{CDCl}_3$

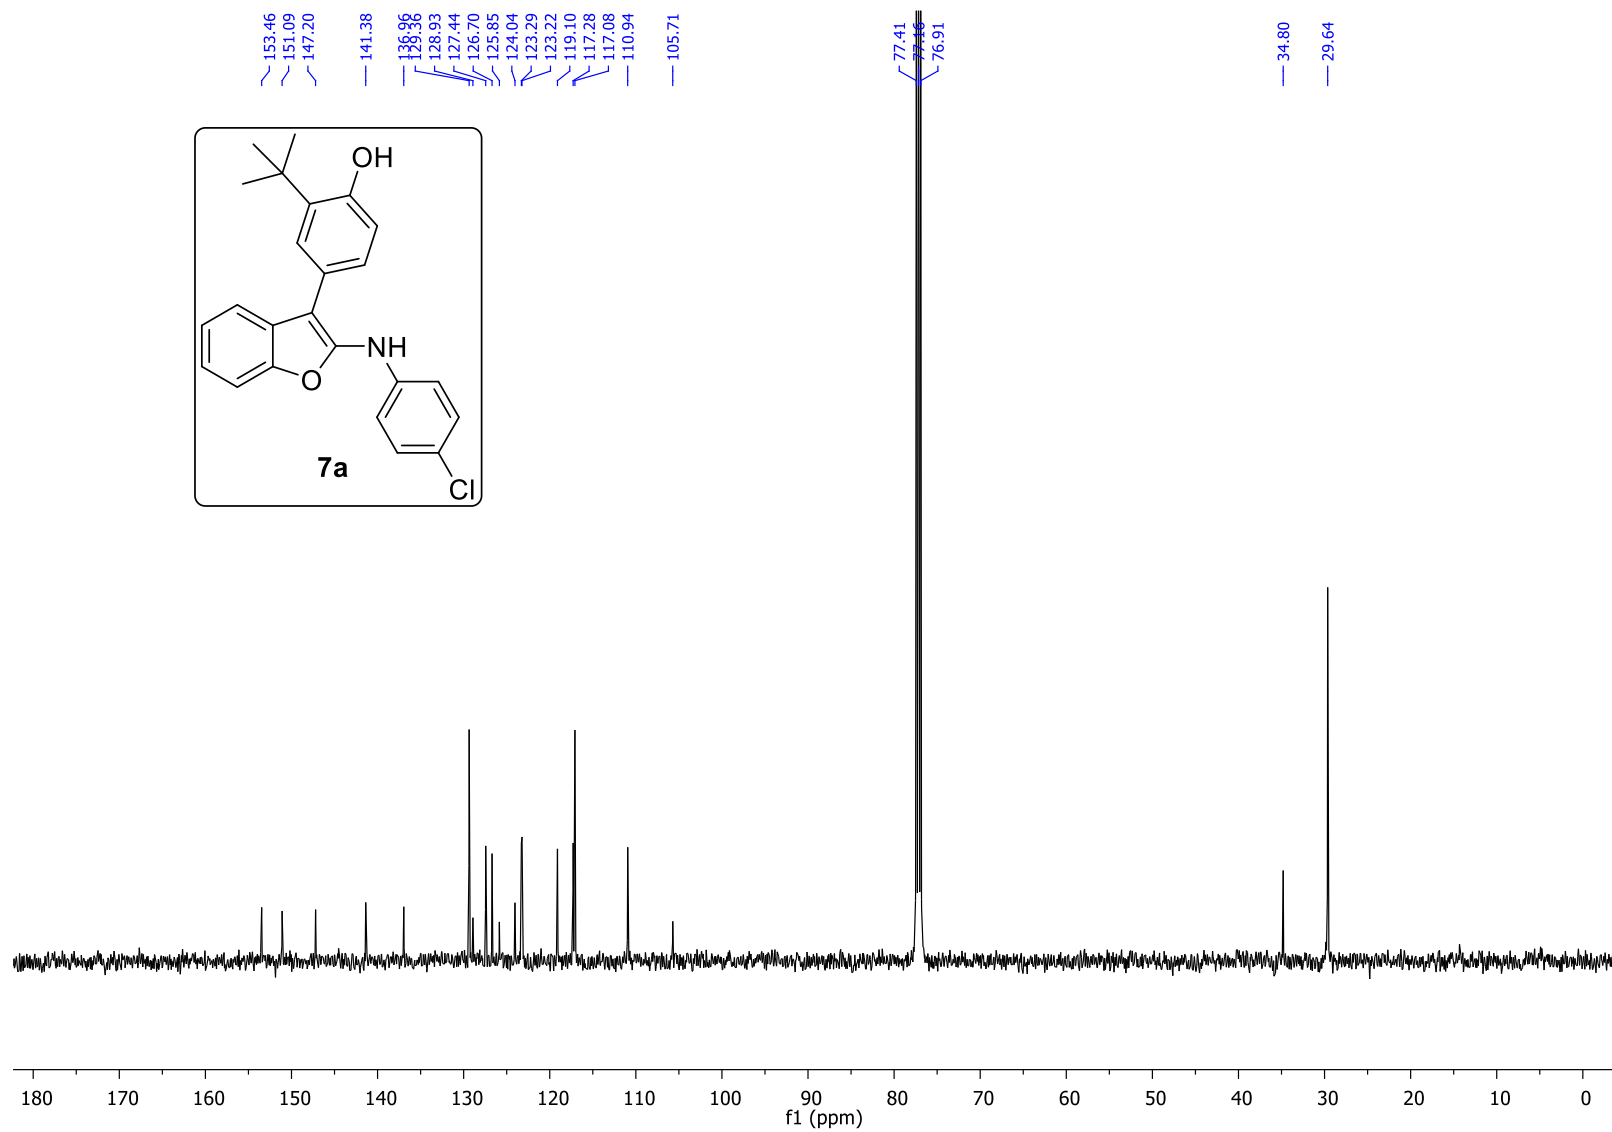

DEPT 135NMR of compound **7a** in CDCl<sub>3</sub>

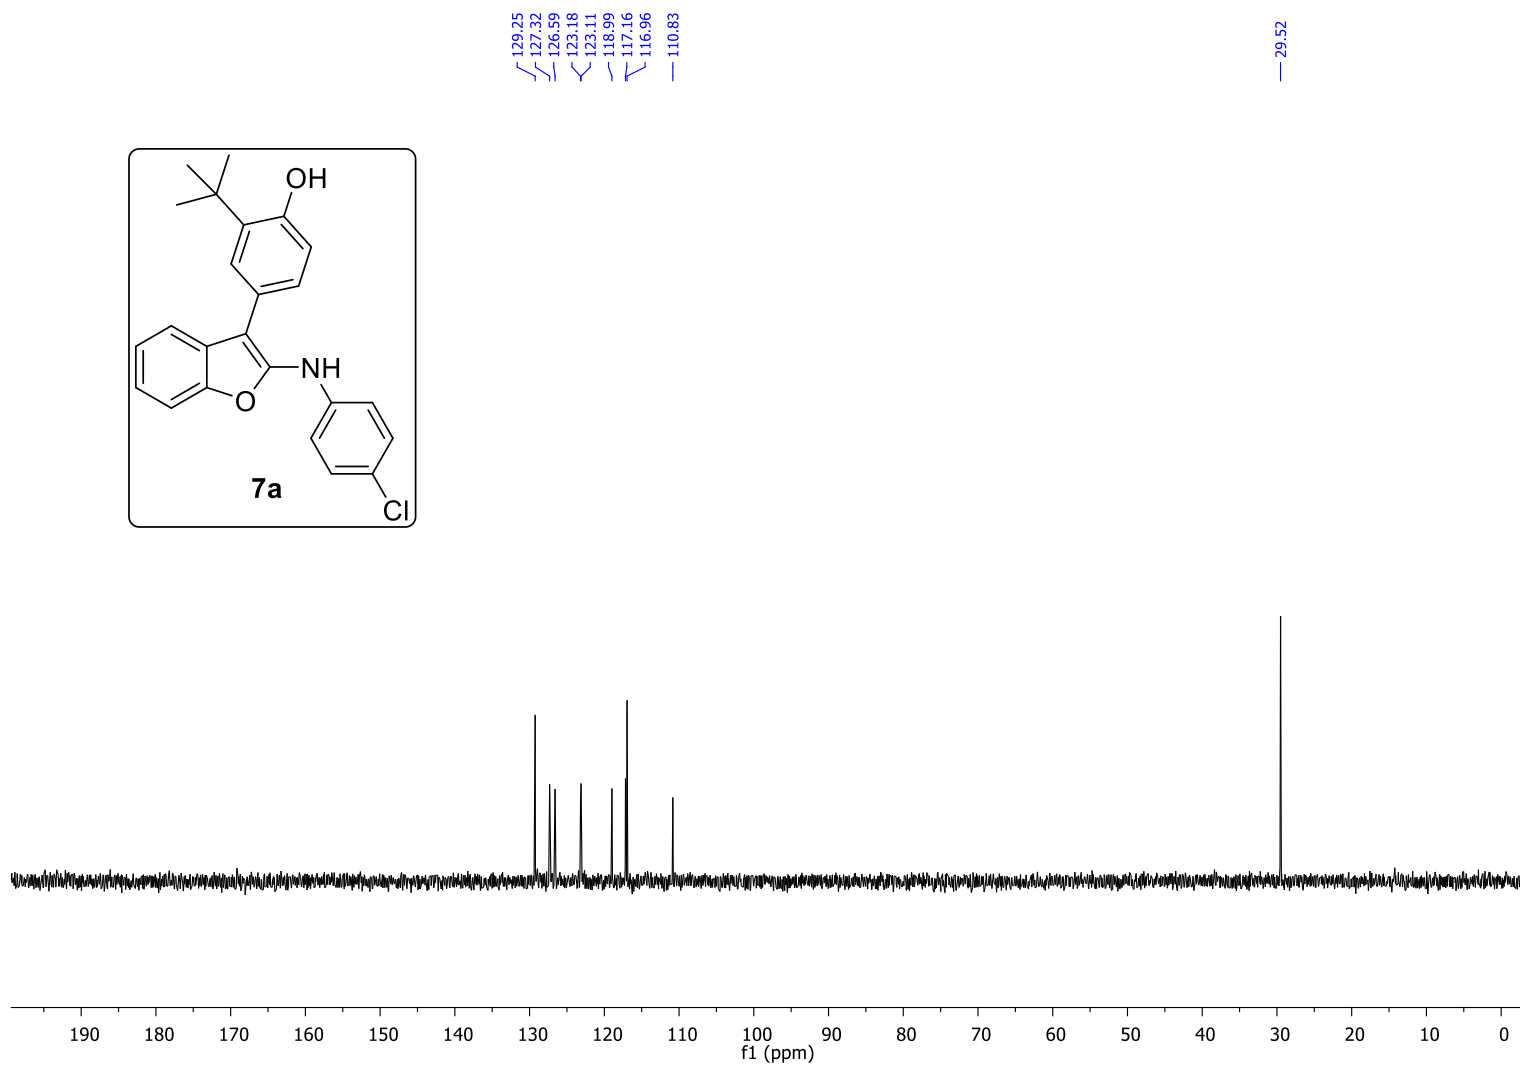



$^{13}\text{C}$  NMR of compound **7b** in  $\text{CDCl}_3$

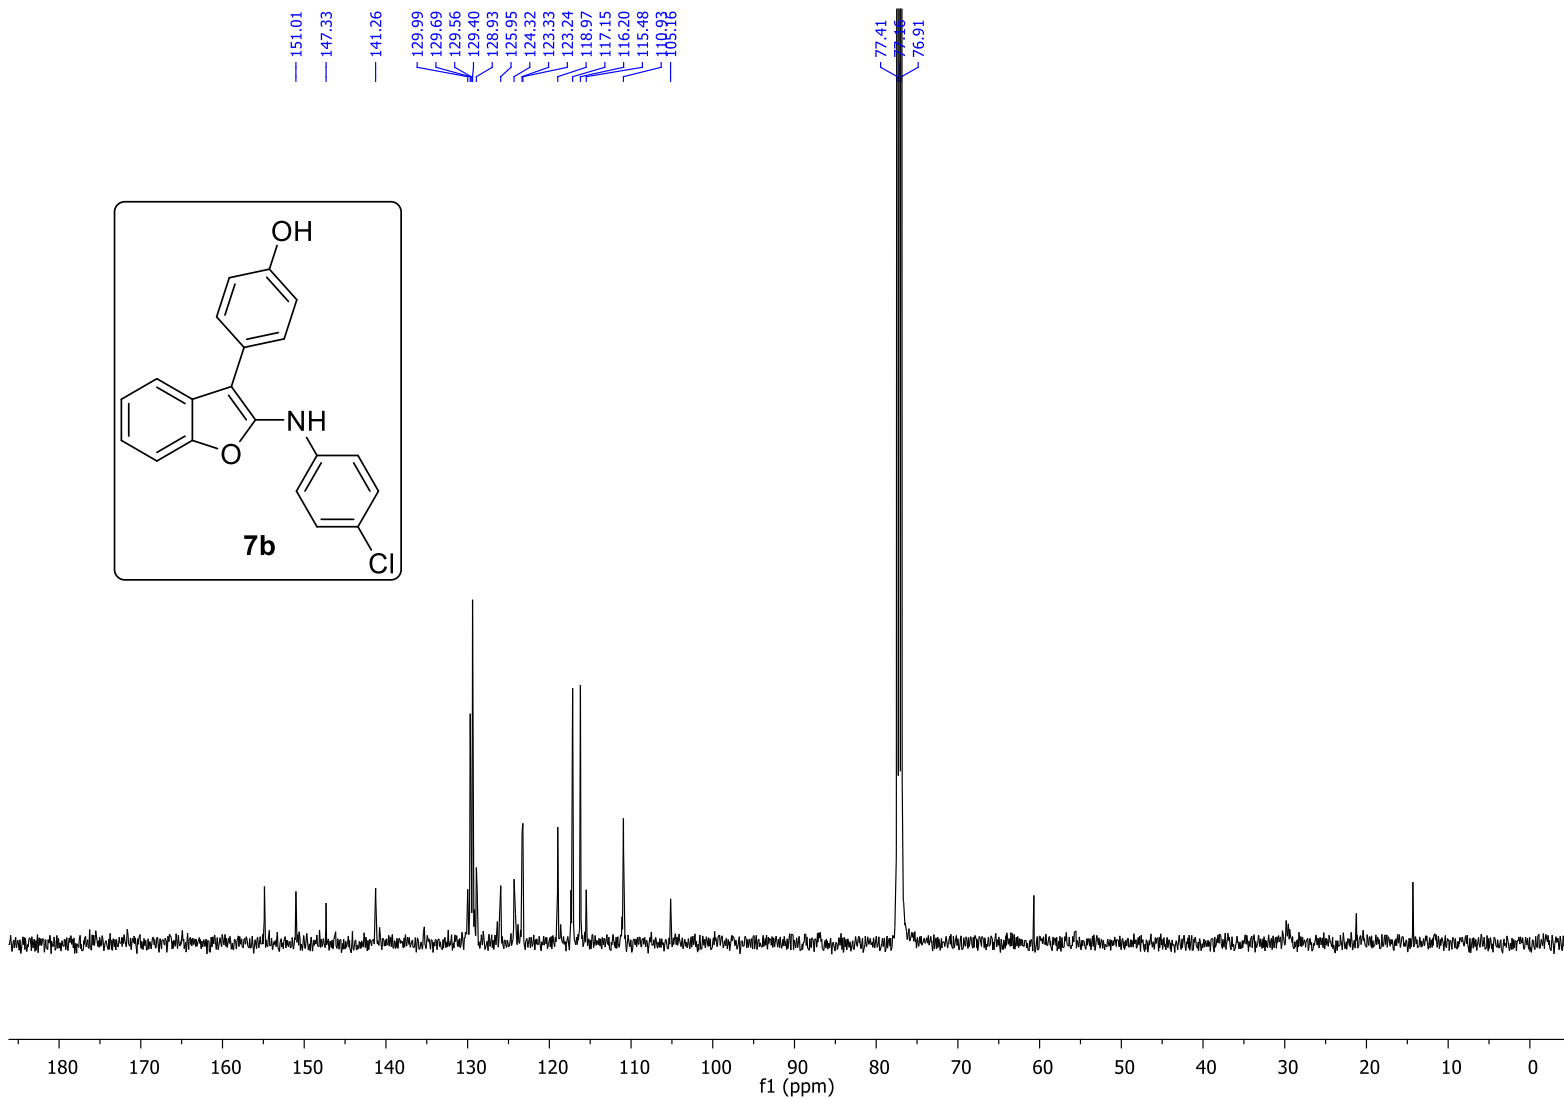

$^1\text{H}$  NMR of compound **9** in  $\text{CDCl}_3$

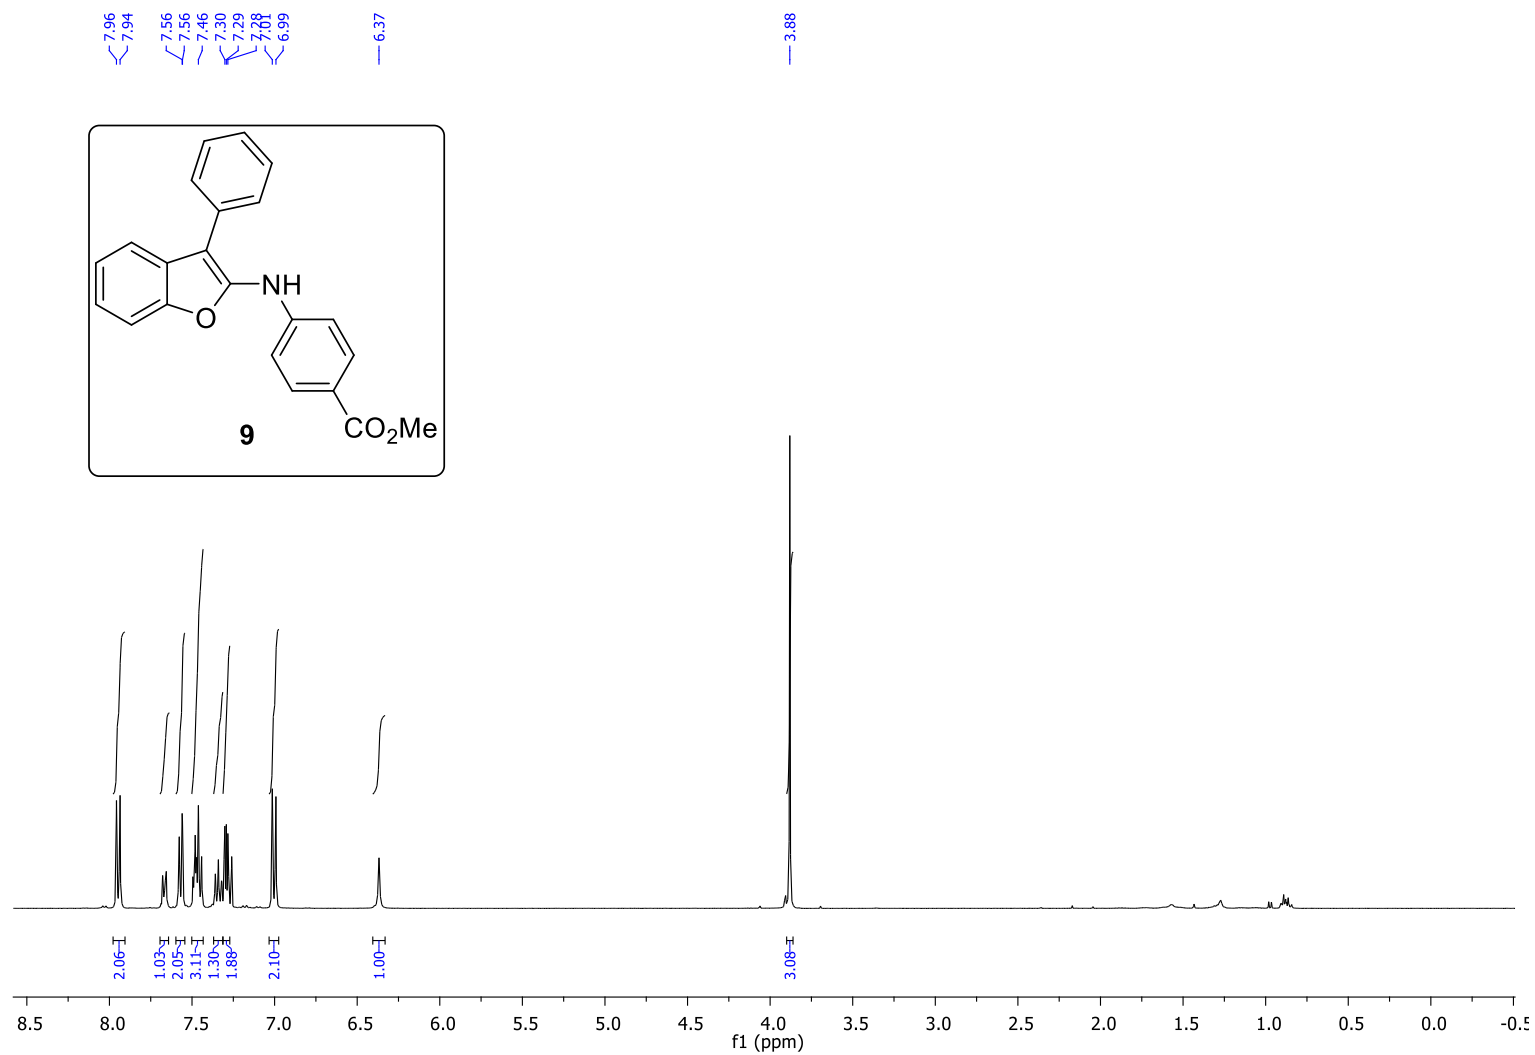

$^{13}\text{C}$  NMR of compound **9** in  $\text{CDCl}_3$



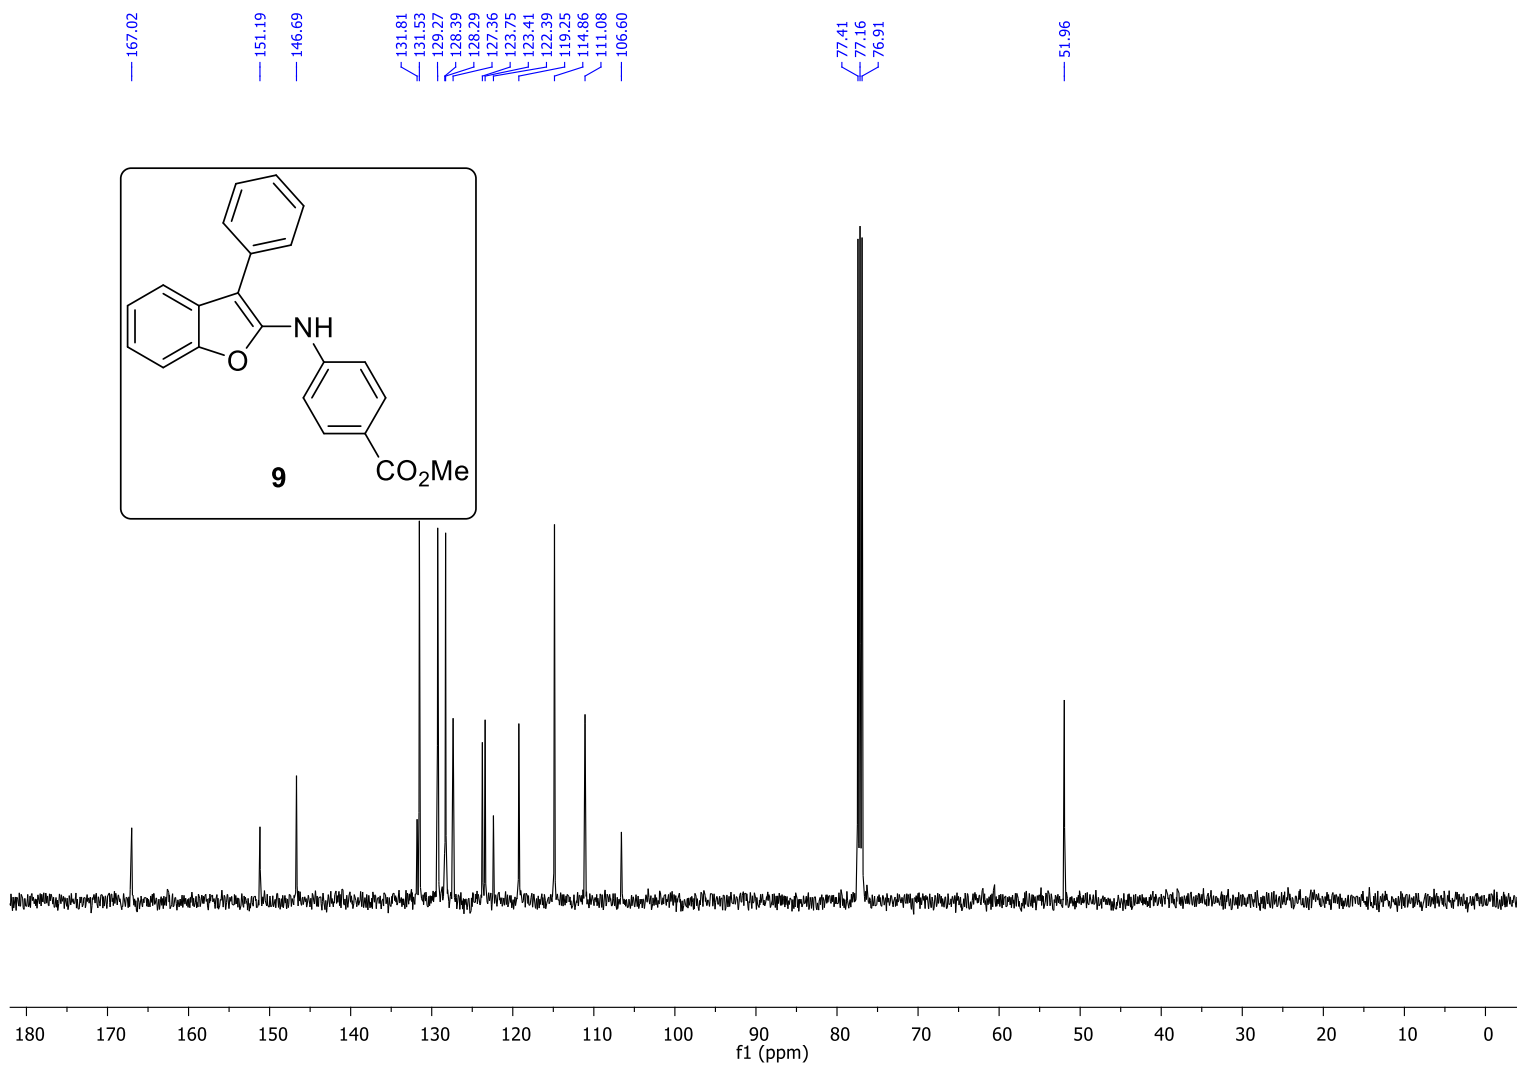

## 8. X-Ray Crystal Data

### X-Ray Crystal Data of Compound 3da

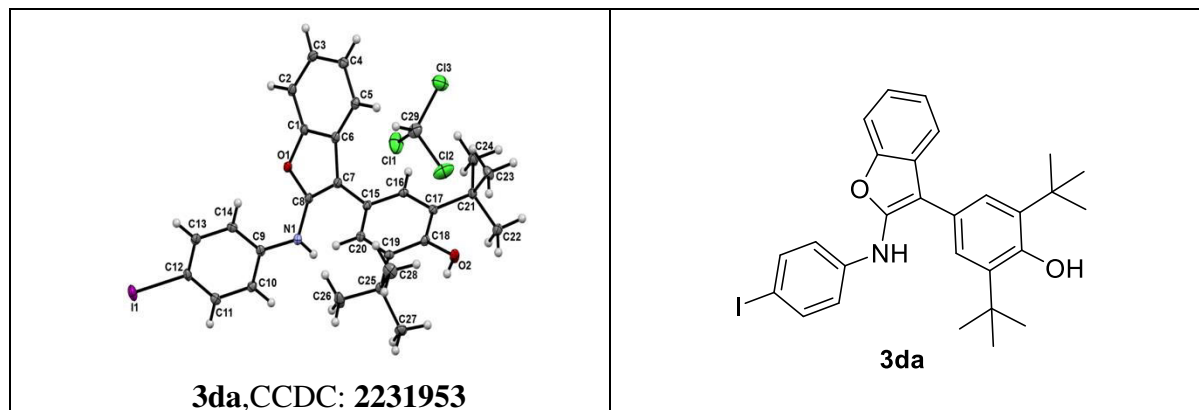

|                        |                                                                          |                                                                          |
|------------------------|--------------------------------------------------------------------------|--------------------------------------------------------------------------|
| Bond precision:        | C-C = 0.0020 Å                                                           | Wavelength=0.71073                                                       |
| Cell:                  | a=9.7428(8)    b=12.0230(12)    c=12.5462(12)                            |                                                                          |
|                        | alpha=91.228(3)    beta=94.255(3)    gamma=108.270(3)                    |                                                                          |
| Temperature:           | 100 K                                                                    |                                                                          |
|                        | Calculated                                                               | Reported                                                                 |
| Volume                 | 1390.2(2)                                                                | 1390.2(2)                                                                |
| Space group            | P -1                                                                     | P -1                                                                     |
| Hall group             | -P 1                                                                     | -P 1                                                                     |
| Moiety formula         | C <sub>28</sub> H <sub>30</sub> I N O <sub>2</sub> , C H Cl <sub>3</sub> | C <sub>28</sub> H <sub>30</sub> I N O <sub>2</sub> , C H Cl <sub>3</sub> |
| Sum formula            | C <sub>29</sub> H <sub>31</sub> Cl <sub>3</sub> I N O <sub>2</sub>       | C <sub>29</sub> H <sub>31</sub> Cl <sub>3</sub> I N O <sub>2</sub>       |
| Mr                     | 658.80                                                                   | 658.80                                                                   |
| Dx, g cm <sup>-3</sup> | 1.574                                                                    | 1.574                                                                    |
| Z                      | 2                                                                        | 2                                                                        |
| Mu (mm <sup>-1</sup> ) | 1.468                                                                    | 1.468                                                                    |
| F <sub>000</sub>       | 664.0                                                                    | 664.0                                                                    |
| F <sub>000</sub> '     | 664.15                                                                   |                                                                          |
| h, k, lmax             | 12, 15, 16                                                               | 12, 15, 16                                                               |
| Nref                   | 6080                                                                     | 5967                                                                     |
| Tmin, Tmax             | 0.824, 0.876                                                             | 0.614, 0.746                                                             |
| Tmin'                  | 0.735                                                                    |                                                                          |
| Correction method= #   | Reported T Limits: Tmin=0.614 Tmax=0.746                                 |                                                                          |
| AbsCorr = MULTI-SCAN   |                                                                          |                                                                          |
| Data completeness=     | 0.981                                                                    | Theta(max)= 27.000                                                       |
| R(reflections)=        | 0.0201( 5821)                                                            | wR2(reflections)=0.0510( 5967)                                           |
| S = 1.069              | Npar= 351                                                                |                                                                          |

### X-Ray Crystal Data of Compound 5am

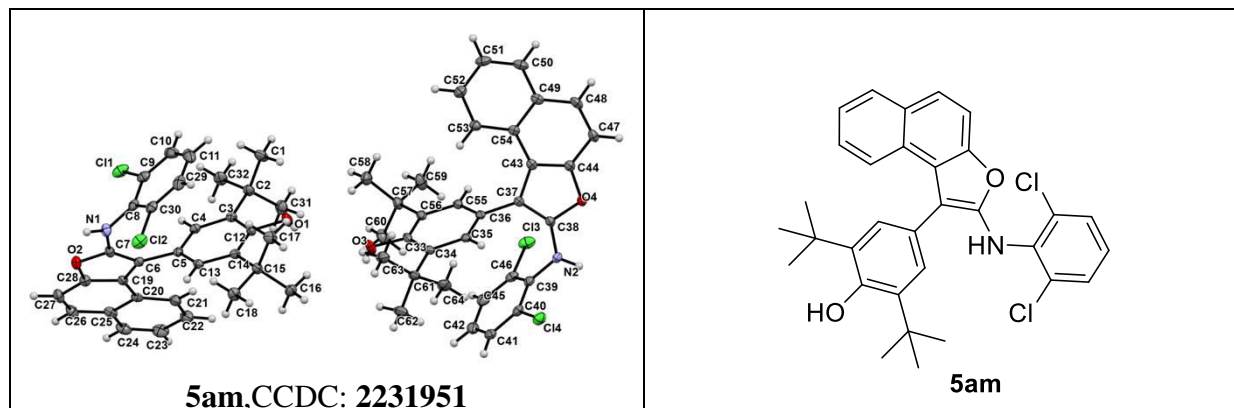

|                        |                                          |                                  |
|------------------------|------------------------------------------|----------------------------------|
| Bond precision:        | C-C = 0.0021 Å                           | Wavelength=0.71073               |
| Cell:                  | a=12.4014 (18)                           | b=26.842 (4)    c=16.599 (3)     |
|                        | alpha=90                                 | beta=98.868 (6)    gamma=90      |
| Temperature:           | 293 K                                    |                                  |
|                        | Calculated                               | Reported                         |
| Volume                 | 5459.4 (15)                              | 5459.4 (14)                      |
| Space group            | P 21/n                                   | P 21/n                           |
| Hall group             | -P 2yn                                   | -P 2yn                           |
| Moiety formula         | C32 H31 Cl2 N O2                         | ?                                |
| Sum formula            | C32 H31 Cl2 N O2                         | C64 H62 Cl4 N2 O4                |
| Mr                     | 532.48                                   | 1064.95                          |
| Dx, g cm <sup>-3</sup> | 1.296                                    | 1.296                            |
| Z                      | 8                                        | 4                                |
| Mu (mm <sup>-1</sup> ) | 0.268                                    | 0.268                            |
| F000                   | 2240.0                                   | 2240.0                           |
| F000'                  | 2243.18                                  |                                  |
| h, k, lmax             | 15, 34, 21                               | 15, 34, 21                       |
| Nref                   | 11928                                    | 11921                            |
| Tmin, Tmax             | 0.968, 0.976                             | 0.678, 0.746                     |
| Tmin'                  | 0.950                                    |                                  |
| Correction method= #   | Reported T Limits: Tmin=0.678 Tmax=0.746 |                                  |
| AbsCorr = MULTI-SCAN   |                                          |                                  |
| Data completeness=     | 0.999                                    | Theta(max)= 26.998               |
| R(reflections)=        | 0.0367 ( 10505)                          | wR2(reflections)=0.0943 ( 11921) |
| S = 1.025              | Npar= 685                                |                                  |

## X-Ray Crystal Data of Compound 6

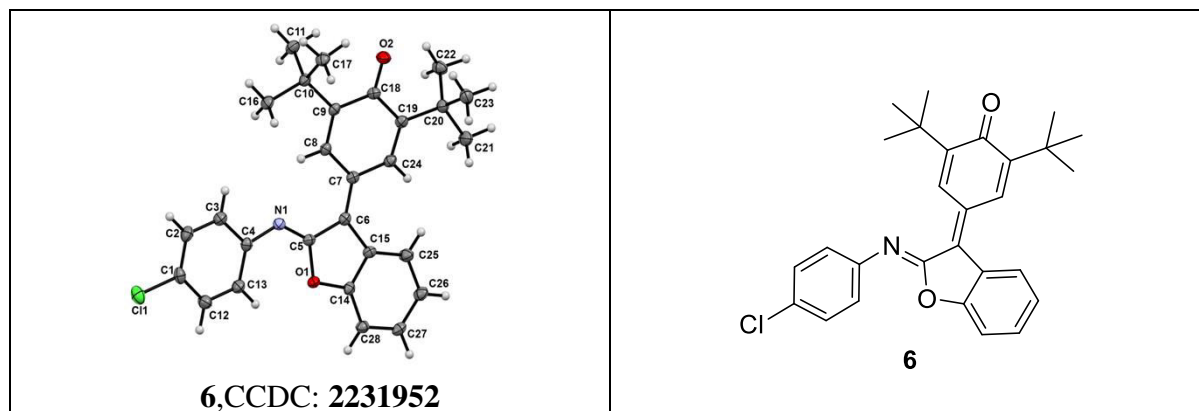

|                                     |                                                                    |                                                     |
|-------------------------------------|--------------------------------------------------------------------|-----------------------------------------------------|
| Bond precision:                     | C-C = 0.0019 Å                                                     | Wavelength=0.71073                                  |
| Cell:                               | a=8.5276(9)                                                        | b=15.1024(13) c=17.9533(17)                         |
|                                     | alpha=90                                                           | beta=93.727(4) gamma=90                             |
| Temperature:                        | 293 K                                                              |                                                     |
|                                     | Calculated                                                         | Reported                                            |
| Volume                              | 2307.3(4)                                                          | 2307.3(4)                                           |
| Space group                         | P 21/n                                                             | P 21/n                                              |
| Hall group                          | -P 2yn                                                             | -P 2yn                                              |
| Moiety formula                      | C <sub>28</sub> H <sub>28</sub> Cl N O <sub>2</sub>                | ?                                                   |
| Sum formula                         | C <sub>28</sub> H <sub>28</sub> Cl N O <sub>2</sub>                | C <sub>28</sub> H <sub>28</sub> Cl N O <sub>2</sub> |
| Mr                                  | 445.96                                                             | 445.96                                              |
| D <sub>x</sub> , g cm <sup>-3</sup> | 1.284                                                              | 1.284                                               |
| Z                                   | 4                                                                  | 4                                                   |
| Mu (mm <sup>-1</sup> )              | 0.191                                                              | 0.191                                               |
| F <sub>000</sub>                    | 944.0                                                              | 944.0                                               |
| F <sub>000</sub> '                  | 944.95                                                             |                                                     |
| h, k, l <sub>max</sub>              | 10, 19, 22                                                         | 10, 19, 22                                          |
| N <sub>ref</sub>                    | 5027                                                               | 5022                                                |
| T <sub>min</sub> , T <sub>max</sub> | 0.975, 0.983                                                       | 0.678, 0.746                                        |
| T <sub>min</sub> '                  | 0.961                                                              |                                                     |
| Correction method= #                | Reported T Limits: T <sub>min</sub> =0.678 T <sub>max</sub> =0.746 |                                                     |
| AbsCorr = MULTI-SCAN                |                                                                    |                                                     |
| Data completeness=                  | 0.999                                                              | Theta (max) = 26.999                                |
| R(Reflections)=                     | 0.0338 ( 4304)                                                     | wR2(Reflections)=0.0873 ( 5022)                     |
| S = 1.068                           | N <sub>par</sub> = 296                                             |                                                     |

## 9. References

- (1) (a) Zhao, K.; Zhi, Y.; Shu, T.; Valkonen, A.; Rissanen, K.; Enders, D.; *Angew. Chem. Int. Ed.* **2016**, *55*, 12104. (b) Chu, W.-D.; Zhang, L.-F.; Bao, X.; Zhao, X.-H.; Zeng, C.; Du, J.-Y.; Zhang, G.-B.; Wang, F.-X.; Ma, X.-Y.; Fan, C.-A.; *Angew. Chem. Int. Ed.* **2013**, *52*, 9229.

(2)Škoch, K.; Císařová, I.; Štěpnička, P.; *Chem. - Eur. J.*, **2018**, *24*, 13788-13791.
